# Supplementary material for: Pattern Recognition in Pulmonary Tuberculosis Defined by High Content Peptide Microarray Chip Analysis Representing 61 Proteins from M. tuberculosis
Source: PubMed Central journal article supplement (PMC2588537; doi:10.1371/journal.pone.0003840), 2008-12-09
Supplement: pone.0003840.s002.pdf [file pone.0003840.s002.pdf]

**Supplementary Table 2. 89 peptides predictive of TB+ (n=34) vs TB- (n=35) by PAM analysis**

| Peptide ID       | Protein                                                                      | Healthy-score | TB -score |
|------------------|------------------------------------------------------------------------------|---------------|-----------|
| VLLESMKMEIPVLA   | CAB08316.1; BIOTINYLATED PROTEIN TB7.3                                       | -0,2588       | 0,2664    |
| IRGSVTPAVSQFNAR  | CAB06500.1; IMMUNOGENIC PROTEIN MPT63                                        | -0,2535       | 0,2609    |
| WGPSSDPAWERNDPT  | CAB10044.1; SECRETED ANTIGEN 85-B FBPB (85B)                                 | -0,2346       | 0,2415    |
| AMEDLVRAYHAMSST  | CAA17363.1; LOW MOLECULAR WEIGHT PROTEIN ANTIGEN 7 ESXH                      | -0,2123       | 0,2186    |
| GFSEIMRSTLEKDNT  | RNA POLYMERASE BETA-SUBUNIT AAA21416                                         | -0,1427       | 0,1469    |
| EGWGKSPGFGTTVDF  | PERIPLASMIC PHOSPHATE-BINDING LIPOPROTEIN PSTS1 YP_177770                    | -0,1226       | 0,1262    |
| ACGGGTNSSSSGAGG  | PERIPLASMIC PHOSPHATE-BINDING LIPOPROTEIN PSTS2 YP_177769                    | -0,1217       | 0,1252    |
| GDLPTIGTAVSARNT  | CAE55335.1; PE FAMILY PROTEIN                                                | -0,1073       | 0,1104    |
| FEETFEVTAAPVAV   | CAB07109.1; PROBABLE 50S RIBOSOMAL PROTEIN L7/L12 RPLL                       | -0,0993       | 0,1022    |
| QDPEGWGKSPGFGTT  | PERIPLASMIC PHOSPHATE-BINDING LIPOPROTEIN PSTS1 YP_177770                    | -0,0917       | 0,0944    |
| NGEYILSARDVLA    | CAB01005.1; 10 KDA CHAPERONIN GROES                                          | -0,0905       | 0,0932    |
| LGGGVGAFNLNLFAG  | YP_177963; PPE FAMILY PROTEIN                                                | -0,0702       | 0,0723    |
| VFGGAASCAAIQAD   | CAB10947.1; PROBABLE LIPOPROTEIN LPRJ                                        | -0,0655       | 0,0675    |
| AAAGDLVGPGEAAYA  | CAA98373.1; MAJOR SECRETED IMMUNOGENIC PROTEIN                               | -0,0592       | 0,0609    |
| TNDGVIFFFNPGEELL | CAA98382.1; IMMUNOGENIC PROTEIN MPT64                                        | -0,0568       | 0,0585    |
| ENYIAQTRDKFLSAA  | CAA98382.1; IMMUNOGENIC PROTEIN MPT64                                        | -0,0526       | 0,0542    |
| DEMTRVIVKLIKDML  | CAA17111.1; PROBABLE ISOCITRATE DEHYDROGENASE                                | -0,0501       | 0,0516    |
| SAAAKNTPGSITYNE  | PERIPLASMIC PHOSPHATE-BINDING LIPOPROTEIN PSTS3 YP_177768                    | -0,0486       | 0,0501    |
| GPGQEGLDQYGSYPL  | PERIPLASMIC PHOSPHATE-BINDING LIPOPROTEIN PSTS2 YP_177769                    | -0,044        | 0,0453    |
| LCKTTSNFIWQQLLL  | CAB06237.1; CONSERVED HYPOTHETICAL PROTEIN                                   | -0,0395       | 0,0407    |
| PVAGQVWEATATVNA  | CAB06500.1; IMMUNOGENIC PROTEIN MPT63                                        | -0,0385       | 0,0397    |
| GVIFFNPGELLPEA   | CAA98382.1; IMMUNOGENIC PROTEIN MPT64                                        | -0,0383       | 0,0394    |
| MTLLELSDFVKKFEE  | CAB07109.1; PROBABLE 50S RIBOSOMAL PROTEIN L7/L12 RPLL                       | -0,038        | 0,0391    |
| SVPANVSRRRAKVDVL | CAB08889.1; IRON-REGULATED CONSERVED HYPOTHETICAL PROTEIN                    | -0,0328       | 0,0338    |
| GFLMPPSDGSGVTPG  | MTB48 AAK31576                                                               | -0,0316       | 0,0325    |
| KTLDAAIGKLLDNDK  | PROBABLE ISOCITRATE DEHYDROGENASE CAA16247                                   | -0,0284       | 0,0293    |
| YEEQMADAFAETGVMF | PROBABLE ISOCITRATE DEHYDROGENASE CAA16247                                   | -0,0251       | 0,0259    |
| AEGDTVYISKYGGTE  | CAB01005.1; 10 KDA CHAPERONIN GROES                                          | -0,0244       | 0,0251    |
| LPLLEKVIAGAKPLL  | 60 kDa chaperonin 2 P0A521                                                   | -0,0227       | 0,0234    |
| TSELPQWLSANRAVK  | CAB10044.1; SECRETED ANTIGEN 85-B FBPB (85B)                                 | -0,022        | 0,0227    |
| PGGTTTTVEHVMGIL  | CAA16030.1; PROBABLE MOLYBDOPTERIN-GUANINE DINUCLEOTIDE BIOSYNTHESIS PROTEIN | -0,0217       | 0,0223    |
| LSEGDMAAHKGLMNI  | PERIPLASMIC PHOSPHATE-BINDING LIPOPROTEIN PSTS1 YP_177770                    | -0,0122       | 0,0125    |
| TIEQLLTIPLAKELA  | MTB81                                                                        | -0,0078       | 0,0081    |
| AKVRRERMGHIELAA  | RNA POLYMERASE BETA'-SUBUNIT AAA21417                                        | -0,0064       | 0,0066    |
| RGEHRDEHTQDAGDK  | CAA17343.1; HEAT SHOCK PROTEIN HSP                                           | -0,0052       | 0,0054    |
| QVVLGWKVSCLKSST  | CAB06500.1; IMMUNOGENIC PROTEIN MPT63                                        | -0,0028       | 0,0029    |
| SPHPLLTHAVEQTGR  | MYCOBACTERIUM BOVIS MYCOCEROSIC ACID SYNTHASE GENE; M95808                   | -0,0015       | 0,0015    |
| VDVFAHWPRAGQLPV  | MYCOBACTERIUM BOVIS MYCOCEROSIC ACID SYNTHASE GENE; M95808                   | 0,0059        | -0,006    |
| GDVGTSVLSWLSDHQ  | MYCOBACTERIUM BOVIS MYCOCEROSIC ACID SYNTHASE GENE; M95808                   | 0,0059        | -0,0061   |
| ATMPYVLELADHGWR  | SECRETED L-ALANINE DEHYDROGENASE ALD CAA15575                                | 0,0059        | -0,0061   |
| RGLERGLNALADAVK  | 60 kDa chaperonin 2 P0A521                                                   | 0,007         | -0,0072   |
| NEDVIVRELTEVQGE  | PROBABLE ISOCITRATE DEHYDROGENASE CAA16247                                   | 0,0147        | -0,0151   |
| VLDDLNSRMPQSRHD  | MCE-FAMILY PROTEIN MCE1AYP_177701                                            | 0,0188        | -0,0194   |
| GAGSSGWWNQAAHAL  | YP_177963; PPE FAMILY PROTEIN                                                | 0,0203        | -0,0209   |
| ASTGQRSRGPSPKFRM | MYCOBACTERIUM BOVIS MYCOCEROSIC ACID SYNTHASE GENE; M95808                   | 0,0227        | -0,0234   |
| VPGRSVSRWGGFLDD  | MYCOBACTERIUM BOVIS MYCOCEROSIC ACID SYNTHASE GENE; M95808                   | 0,0234        | -0,024    |
| YVIAGDIPLINIPPT  | YP_177963; PPE FAMILY PROTEIN                                                | 0,0237        | -0,0244   |
| TDEQAITAATAHATA  | MYCOBACTERIUM BOVIS MYCOCEROSIC ACID SYNTHASE GENE; M95808                   | 0,0288        | -0,0296   |
| LGGVVAANLGRAASV  | CAE55371.1; PPE FAMILY PROTEIN                                               | 0,0325        | -0,0334   |
| PMSTRLGIRLVIVLV  | POSSIBLE GLYCOSYL TRANSFERASE CAB05419                                       | 0,0332        | -0,0342   |
| GIRLVIVLVRWPKV   | POSSIBLE GLYCOSYL TRANSFERASE CAB05419                                       | 0,0338        | -0,0348   |
| ERYPEWNEGVKGAUV  | CONSERVED HYPOTHETICAL PROTEIN TB18.5CAD93033                                | 0,0339        | -0,0349   |
| FAHWPRAGQLPVSAI  | MYCOBACTERIUM BOVIS MYCOCEROSIC ACID SYNTHASE GENE; M95808                   | 0,0368        | -0,0379   |
| GEIWWHGDVNGNGYW  | MYCOBACTERIUM BOVIS ACYL-COA SYNTHASE GENE; U75685                           | 0,0381        | -0,0392   |
| SDALRQTARQLATWV  | MYCOBACTERIUM BOVIS MYCOCEROSIC ACID SYNTHASE GENE; M95808                   | 0,0386        | -0,0397   |
| GTMKSQPWILAYEDH  | MTB81                                                                        | 0,039         | -0,0401   |
| MLEMRTHVETETGIR  | MYCOBACTERIUM BOVIS MYCOCEROSIC ACID SYNTHASE GENE; M95808                   | 0,0392        | -0,0403   |
| DELIDRDWSPKVFSGS | MYCOBACTERIUM BOVIS MYCOCEROSIC ACID SYNTHASE GENE; M95808                   | 0,0446        | -0,0459   |

|                  |                                                                        |        |         |
|------------------|------------------------------------------------------------------------|--------|---------|
| LIATGEQVLVNEHLI  | CONSERVED HYPOTHETICAL PROTEIN CAB08634                                | 0,0452 | -0,0465 |
| VLWSPDVKPPTWWHS  | POSSIBLE GLYCOSYL TRANSFERASE CAB05418                                 | 0,0549 | -0,0565 |
| SQVGTAVKAFQSTI   | PERIPLASMIC PHOSPHATE-BINDING LIPOPROTEIN PSTS3 YP_177768              | 0,0636 | -0,0655 |
| FGANMSGWVNQAHTA  | YP_177963; PPE FAMILY PROTEIN                                          | 0,0645 | -0,0663 |
| GTAVLAGASLVAVSW  | POSSIBLE HEMOLYSIN-LIKE PROTEIN CAA17201                               | 0,0663 | -0,0682 |
| PIVFLPSMTIGGQT   | YP_177963; PPE FAMILY PROTEIN                                          | 0,0668 | -0,0688 |
| TLTDALKSHGPQGTE  | MYCOBACTERIUM BOVIS MYCOCEROSIC ACID SYNTHASE GENE; M95808             | 0,068  | -0,07   |
| VGWANMGLGNIGFGN  | YP_177963; PPE FAMILY PROTEIN                                          | 0,0755 | -0,0777 |
| RSVSRWGGFLDDVAG  | MYCOBACTERIUM BOVIS MYCOCEROSIC ACID SYNTHASE GENE; M95808             | 0,0765 | -0,0787 |
| IDKWHRRRVIEPIDM  | MTB81                                                                  | 0,0827 | -0,0851 |
| ANHEYLGVLWSPAG   | POSSIBLE GLYCOSYL TRANSFERASE CAB05415                                 | 0,0961 | -0,0989 |
| EGVTGHQVGDVGGF   | MYCOBACTERIUM BOVIS MYCOCEROSIC ACID SYNTHASE GENE; M95808             | 0,1032 | -0,1062 |
| GTPCALGSAKSNMGH  | MYCOBACTERIUM BOVIS MYCOCEROSIC ACID SYNTHASE GENE; M95808             | 0,1115 | -0,1148 |
| LALRDQVIPPTLNLV  | 3-OXOACYL-[ACYL-CARRIER PROTEIN] SYNTHASE 2 KASB CAA94642              | 0,1121 | -0,1154 |
| SNAVDTPDMLASTLT  | MYCOBACTERIUM BOVIS MYCOCEROSIC ACID SYNTHASE GENE; M95808             | 0,1142 | -0,1175 |
| AEHTGKLVLDVPRSG  | MYCOBACTERIUM BOVIS MYCOCEROSIC ACID SYNTHASE GENE; M95808             | 0,1144 | -0,1177 |
| GFGNFGAGSSGWWNQ  | YP_177963; PPE FAMILY PROTEIN                                          | 0,1191 | -0,1226 |
| GFGPIAVPSVTIPAL  | YP_177963; PPE FAMILY PROTEIN                                          | 0,1311 | -0,135  |
| FGNFGANMSGWVNQA  | YP_177963; PPE FAMILY PROTEIN                                          | 0,1314 | -0,1353 |
| APGCWQPITRDLWPA  | MCE-FAMILY PROTEIN MCE1AYP_177701                                      | 0,1422 | -0,1463 |
| GNFGAGSSGWWNQA   | YP_177963; PPE FAMILY PROTEIN                                          | 0,1442 | -0,1484 |
| CAMFTDLLAQPTPAW  | PUTATIVE CYCLOPROPANE-FATTY-ACYL-PHOSPHOLIPID SYNTHASE UFAA1 NP_854118 | 0,1475 | -0,1518 |
| IQVAIPLTSATLGGL  | YP_177963; PPE FAMILY PROTEIN                                          | 0,16   | -0,1647 |
| AAAAMAAAATPYVGVW | PPE FAMILY PROTEIN CAE55334                                            | 0,1614 | -0,1662 |
| NMSGWVNQAHTALAG  | YP_177963; PPE FAMILY PROTEIN                                          | 0,1817 | -0,1871 |
| IPIDIPIDIPASTI   | YP_177963; PPE FAMILY PROTEIN                                          | 0,1909 | -0,1966 |
| CIECPDGTVEIWWH   | MYCOBACTERIUM BOVIS ACYL-COA SYNTHASE GENE; U75685                     | 0,1933 | -0,199  |
| EPGVPGRSVSRWGGF  | MYCOBACTERIUM BOVIS MYCOCEROSIC ACID SYNTHASE GENE; M95808             | 0,2218 | -0,2284 |
| KRLPMSTRLGIRLVI  | POSSIBLE GLYCOSYL TRANSFERASE CAB05419                                 | 0,2232 | -0,2298 |
| TRLGIRLVIVLVRW   | POSSIBLE GLYCOSYL TRANSFERASE CAB05419                                 | 0,3283 | -0,3379 |
| WHRRRVIEPIDMDAY  | MTB81                                                                  | 0,395  | -0,4067 |
