# Supplementary material for: Pattern Recognition in Pulmonary Tuberculosis Defined by High Content Peptide Microarray Chip Analysis Representing 61 Proteins from M. tuberculosis
Source: PubMed Central journal article supplement (PMC2588537; doi:10.1371/journal.pone.0003840), 2008-12-09
Supplement: pone.0003840.s003.pdf [file pone.0003840.s003.pdf]

**Supplementary Table 3. Peptides predictive of TB+ (n=34) vs TB- (n=35) by SAM analysis**

| Peptide ID       | Protein                                                                      | Score(d)    | Fold Change |
|------------------|------------------------------------------------------------------------------|-------------|-------------|
| WGPSSDPAWERNDPT  | CAB10044.1; SECRETED ANTIGEN 85-B FBPB (85B)                                 | 7,543056466 | 1,492452594 |
| IRGSVTPAV/SQFNAR | CAB06500.1; IMMUNOGENIC PROTEIN MPT63                                        | 7,226410972 | 1,605744998 |
| VLLESMKMEIPVLAE  | CAB08316.1; BIOTINYLATED PROTEIN TB7.3                                       | 6,395170976 | 2,659637684 |
| AMEDLVRAYHAMSST  | CAA17363.1; LOW MOLECULAR WEIGHT PROTEIN ANTIGEN 7 ESXH                      | 6,359877451 | 1,64631432  |
| EGWGKSPGFGTTVDF  | PERIPLASMIC PHOSPHATE-BINDING LIPOPROTEIN PSTS1 YP_177770                    | 5,952928524 | 1,453083374 |
| GFSEIMRSTLEKDNT  | RNA POLYMERASE BETA-SUBUNIT AAA21416                                         | 5,824780797 | 1,49666428  |
| ACGGGTNSSSSGAGG  | PERIPLASMIC PHOSPHATE-BINDING LIPOPROTEIN PSTS2 YP_177769                    | 5,630151939 | 1,487331017 |
| FEETFEVTAAPVAV   | CAB07109.1; PROBABLE 50S RIBOSOMAL PROTEIN L7/L12 RPLL                       | 5,397598823 | 1,428631429 |
| LGGVGGAFLNALFAG  | YP_177963; PPE FAMILY PROTEIN                                                | 5,249389006 | 1,373591334 |
| QDPEGWGKSPGFGTT  | PERIPLASMIC PHOSPHATE-BINDING LIPOPROTEIN PSTS1 YP_177770                    | 5,164393514 | 1,535252696 |
| SAAAKNTPGSITYNE  | PERIPLASMIC PHOSPHATE-BINDING LIPOPROTEIN PSTS3 YP_177768                    | 5,073107234 | 1,340551209 |
| NGEEYLILSARDVLA  | CAB01005.1; 10 KDA CHAPERONIN GROES                                          | 5,046942792 | 1,57280672  |
| GDLPTIGTAVSARNT  | CAE55335.1; PE FAMILY PROTEIN                                                | 5,019799543 | 1,549150717 |
| VFGGAASCAPIQAD   | CAB10947.1; PROBABLE LIPOPROTEIN LPRJ                                        | 4,996426873 | 1,431101124 |
| GPGQEGLDQYGSIFL  | PERIPLASMIC PHOSPHATE-BINDING LIPOPROTEIN PSTS2 YP_177769                    | 4,95040986  | 1,343962311 |
| ENYIAQTRDKFLSAA  | CAA98382.1; IMMUNOGENIC PROTEIN MPT64                                        | 4,913217198 | 1,391534609 |
| AAAGDLVGPGEAIEYA | CAA98373.1; MAJOR SECRETED IMMUNOGENIC PROTEIN                               | 4,838836065 | 1,424093299 |
| PVAGQVWEATATVNA  | CAB06500.1; IMMUNOGENIC PROTEIN MPT63                                        | 4,805006274 | 1,379400624 |
| LSEGDMAAHKGLMNI  | PERIPLASMIC PHOSPHATE-BINDING LIPOPROTEIN PSTS1 YP_177770                    | 4,787581389 | 1,291054396 |
| GFLMPPSDGSGVTPG  | MTB48 AAK31576                                                               | 4,612601363 | 1,360779775 |
| DEMTRVIWKLKIDML  | CAA17111.1; PROBABLE ISOCITRATE DEHYDROGENASE                                | 4,557135764 | 1,493835585 |
| KTLDAAIGKLLDNDK  | PROBABLE ISOCITRATE DEHYDROGENASE CAA16247                                   | 4,543138388 | 1,43383417  |
| MTLLELSDFVKKFEE  | CAB07109.1; PROBABLE 50S RIBOSOMAL PROTEIN L7/L12 RPLL                       | 4,529431708 | 1,480964789 |
| SVPANVSRRAKVDVL  | CAB08889.1; IRON-REGULATED CONSERVED HYPOTHETICAL PROTEIN                    | 4,525562693 | 1,37587643  |
| AEGDVTIYSKYGGTE  | CAB01005.1; 10 KDA CHAPERONIN GROES                                          | 4,506372376 | 1,39241218  |
| AKVRRERMGHIELAA  | RNA POLYMERASE BETA'-SUBUNIT AAA21417                                        | 4,504619992 | 1,317442718 |
| TSELQWLSANRAVK   | CAB10044.1; SECRETED ANTIGEN 85-B FBPB (85B)                                 | 4,419395015 | 1,37466625  |
| CGGVSTANATVYIMD  | CAA98373.1; MAJOR SECRETED IMMUNOGENIC PROTEIN                               | 4,382030526 | 1,289270173 |
| QVVLGWKVSCLKSST  | CAB06500.1; IMMUNOGENIC PROTEIN MPT63                                        | 4,36325164  | 1,324089833 |
| RKVVVTKDETTIVEG  | 60 kDa chaperonin 2 POA521                                                   | 4,346190145 | 1,249218162 |
| TGGGGGSGFSNSGSG  | YP_177963; PPE FAMILY PROTEIN                                                | 4,340725478 | 1,277469926 |
| GDDDRHLHMLTDRDI  | HYPOTHETICAL PROTEIN RV2626C NP_217142                                       | 4,321666353 | 1,30931065  |
| HRSDGSGDTFLFTQY  | PERIPLASMIC PHOSPHATE-BINDING LIPOPROTEIN PSTS1 YP_177770                    | 4,295379775 | 1,264835122 |
| LEAAGDKKIGVIVV   | CAB07109.1; PROBABLE 50S RIBOSOMAL PROTEIN L7/L12 RPLL                       | 4,282202095 | 1,281240425 |
| RGEHRDEHTQDAGDK  | CAA17343.1; HEAT SHOCK PROTEIN HSP                                           | 4,278446467 | 1,327223015 |
| WISEYKEVEILEADD  | CONSERVED HYPOTHETICAL PROTEIN TB16.3CAD97060                                | 4,276759181 | 1,308237261 |
| PGGTTTLVEHMGVIL  | CAA16030.1; PROBABLE MOLYBDOPTERIN-GUANINE DINUCLEOTIDE BIOSYNTHESIS PROTEIN | 4,26813859  | 1,355496021 |
| TLQAFHLHWAITDGNK | PERIPLASMIC PHOSPHATE-BINDING LIPOPROTEIN PSTS1 YP_177770                    | 4,260838908 | 1,31242242  |
| YEEQMDFAFETGVMF  | PROBABLE ISOCITRATE DEHYDROGENASE CAA16247                                   | 4,221681026 | 1,702239193 |
| AMMARDTAEAAKWGG  | CAA17363.1; LOW MOLECULAR WEIGHT PROTEIN ANTIGEN 7 ESXH                      | 4,199424311 | 1,27612978  |
| RGLRAAAEAGVRLAF  | CAA16030.1; PROBABLE MOLYBDOPTERIN-GUANINE DINUCLEOTIDE BIOSYNTHESIS PROTEIN | 4,186145299 | 1,292019249 |
| TNDGVIFFFNPGELL  | CAA98382.1; IMMUNOGENIC PROTEIN MPT64                                        | 4,166409029 | 2,874073623 |
| GVIFFFNPGELLPEA  | CAA98382.1; IMMUNOGENIC PROTEIN MPT64                                        | 4,141959035 | 1,847326701 |
| LPGVSEHLKLNKVL   | PERIPLASMIC PHOSPHATE-BINDING LIPOPROTEIN PSTS1 YP_177770                    | 4,133968498 | 1,32288704  |
| TIEQLLTIPLAKELA  | MTB81                                                                        | 4,129069409 | 1,452230375 |
| LCKTTSNFIWGQLLL  | CAB06237.1; CONSERVED HYPOTHETICAL PROTEIN                                   | 4,128641073 | 2,84585048  |
| SPHLLTHAVEQTGR   | MYCOBACTERIUM BOVIS MYCOCEROSIC ACID SYNTHASE GENE; M95808                   | 4,053212382 | 1,36357465  |
| IADIEAYPQWISEYK  | CONSERVED HYPOTHETICAL PROTEIN TB16.3CAD97060                                | 4,049527406 | 1,57286585  |
| SKVSTVKDLLPLLEK  | 60 kDa chaperonin 2 POA521                                                   | 4,020404419 | 1,301176314 |
| LFSRVEDVLGLPQNT  | MTB81                                                                        | 4,020399162 | 1,251941384 |
| MWELYLAYSEAGFRS  | PUTATIVE CYCLOPROPANE-FATTY-ACYL-PHOSPHOLIPID SYNTHASE UFAA1 NP_854118       | 4,014670768 | 1,301045967 |
| AAHKGLMNIALAISA  | PERIPLASMIC PHOSPHATE-BINDING LIPOPROTEIN PSTS1 YP_177770                    | 4,011051567 | 1,292531068 |
| DTLNGGEYTVFAPTN  | CAA98350.1; CELL SURFACE LIPOPROTEIN MPT83                                   | 3,98438077  | 1,306070988 |
| YDREKLQERLAKLAG  | 60 kDa chaperonin 2 POA521                                                   | 3,968710251 | 1,355865331 |
| VRERMTTQDVEAITP  | RNA POLYMERASE BETA-SUBUNIT AAA21416                                         | 3,92827977  | 1,35216364  |
| GDLVGPGEAYAAAN   | CAA98373.1; MAJOR SECRETED IMMUNOGENIC PROTEIN                               | 3,913998348 | 1,346280476 |
| ANRAVKPTGSAAIIGL | CAB10044.1; SECRETED ANTIGEN 85-B FBPB (85B)                                 | 3,908915102 | 1,254393918 |
| MSFVTIQPVVLAAT   | CAE55335.1; PE FAMILY PROTEIN                                                | 3,847796095 | 1,323958723 |

|                  |                                                                              |             |             |
|------------------|------------------------------------------------------------------------------|-------------|-------------|
| LPLLEKVIAGKPLL   | 60 kDa chaperonin 2 P0A521                                                   | 3,799506967 | 5,966619148 |
| EDEMKEGRYEVRAEL  | CAA17245.1; HEAT SHOCK PROTEIN HSPX                                          | 3,794948053 | 1,233490479 |
| PPGYDITALLQAHPH  | MYCOBACTERIUM BOVIS MYCOCEROSIC ACID SYNTHASE GENE; M95808                   | 3,770023725 | 1,258515759 |
| VGPGRWDEDGEKRI   | CAB01005.1; 10 KDA CHAPERONIN GROES                                          | 3,73008544  | 1,219942489 |
| LGWKVSDLKSSTAVI  | CAB06500.1; IMMUNOGENIC PROTEIN MPT63                                        | 3,728183404 | 1,691886699 |
| AAASLAAIAIAFLAG  | CAA98350.1; CELL SURFACE LIPOPROTEIN MPT83                                   | 3,726944335 | 1,218451245 |
| AGTVNIGASDAYLSE  | PERIPLASMIC PHOSPHATE-BINDING LIPOPROTEIN PSTS1 YP_177770                    | 3,718066062 | 1,261432497 |
| QQQWRGAAGTAAQAA  | CAA17966.1; 10 KDA CULTURE FILTRATE ANTIGEN ESXB                             | 3,714141845 | 1,266013899 |
| VGQVTATMGQLQLV   | CAB06237.1; CONSERVED HYPOTHETICAL PROTEIN                                   | 3,69540828  | 1,239482592 |
| AGGYKAADMWGPSSD  | CAB10044.1; SECRETED ANTIGEN 85-B FBPB (85B)                                 | 3,685083925 | 1,22459453  |
| PGQGAYAAANSWVDV  | MYCOBACTERIUM BOVIS MYCOCEROSIC ACID SYNTHASE GENE; M95808                   | 3,678353448 | 1,311166881 |
| QVGSQFGPYQLRL    | TRANSMEMBRANE SERINE/THREONINE-PROTEIN KINASE D PKND NP_215446               | 3,648920557 | 1,972064128 |
| RIFYKDAFAKHQELF  | PROBABLE ISOCITRATE DEHYDROGENASE CAA16247                                   | 3,641917277 | 2,174705555 |
| TCELSRVEDVGLGP   | MTB81                                                                        | 3,635983241 | 1,244140777 |
| DVGSNLNGTYVNR    | CAB01474.1; CONSERVED HYPOTHETICAL PROTEIN CFP17                             | 3,635236196 | 1,330963304 |
| SEFDVLEAAGDKKI   | CAB07109.1; PROBABLE 50S RIBOSOMAL PROTEIN L7/L12 RPLL                       | 3,629166901 | 1,763418706 |
| LGENGNGMVTGCAE   | PERIPLASMIC PHOSPHATE-BINDING LIPOPROTEIN PSTS1 YP_177770                    | 3,595085324 | 1,198416921 |
| TSEQIVERFGFSEIM  | RNA POLYMERASE BETA-SUBUNIT AAA21416                                         | 3,593269783 | 1,441432449 |
| EAEHQAIVRDVLAA   | PUTATIVE ESAT-6 LIKE PROTEIN ESXN YP_177838                                  | 3,580808637 | 1,260995712 |
| YIGISFLDQASQRL   | PERIPLASMIC PHOSPHATE-BINDING LIPOPROTEIN PSTS1 YP_177770                    | 3,553659689 | 1,239501957 |
| RGLGEAQLGNSSGNF  | PERIPLASMIC PHOSPHATE-BINDING LIPOPROTEIN PSTS1 YP_177770                    | 3,544484337 | 1,229393291 |
| LSIVMPVGGQSSFY   | CAB10044.1; SECRETED ANTIGEN 85-B FBPB (85B)                                 | 3,543904042 | 1,279160099 |
| VALFGPSSGFSMML   | PROBABLE CUTINASE PRECURSOR CFP21 NP_216500                                  | 3,533941308 | 2,016206769 |
| TWQTKSGGTRTGNVT  | CAB09453.1; PROBABLE SERINE PROTEASE PEPA                                    | 3,525451301 | 1,244619216 |
| TGNMISNQAQYVSDT  | CAB06237.1; CONSERVED HYPOTHETICAL PROTEIN                                   | 3,516965266 | 1,285557713 |
| LASTLTDALKSHGPQ  | MYCOBACTERIUM BOVIS MYCOCEROSIC ACID SYNTHASE GENE; M95808                   | 3,512910002 | 1,219803845 |
| SAAIGLSMAGSSAMI  | CAB10044.1; SECRETED ANTIGEN 85-B FBPB (85B)                                 | 3,5118702   | 1,202126625 |
| ESGTTDNFQRYLQAA  | PERIPLASMIC PHOSPHATE-BINDING LIPOPROTEIN PSTS3 YP_177768                    | 3,508094545 | 1,236890001 |
| HVIAGQASPSRIDGT  | CAA98350.1; CELL SURFACE LIPOPROTEIN MPT83                                   | 3,487395491 | 1,219266395 |
| CVAYIGISFLDQASQ  | PERIPLASMIC PHOSPHATE-BINDING LIPOPROTEIN PSTS1 YP_177770                    | 3,455200032 | 1,237933076 |
| PETINYRTLKPEKDG  | RNA POLYMERASE BETA-SUBUNIT AAA21417                                         | 3,43476377  | 1,218566129 |
| FPSFAGLRPTFDTRL  | CAA17245.1; HEAT SHOCK PROTEIN HSPX                                          | 3,414098855 | 3,988954005 |
| VSVAVSEGKPTKHI   | CAA17245.1; HEAT SHOCK PROTEIN HSPX                                          | 3,39206489  | 1,22861781  |
| NTPAIAVNNEAEYGEN | CAE55371.1; PPE FAMILY PROTEIN                                               | 3,37521295  | 1,205161367 |
| HQQGGGAKSKGSQQE  | MTB48 AAK31576                                                               | 3,370006917 | 1,270127225 |
| PDRSAERCSPAWDL   | PERIPLASMIC PHOSPHATE-BINDING LIPOPROTEIN PSTS2 YP_177769                    | 3,357336369 | 1,306068486 |
| EKVAKAADEAKAKL   | CAB07109.1; PROBABLE 50S RIBOSOMAL PROTEIN L7/L12 RPLL                       | 3,355732495 | 1,293919875 |
| PLDTPPAPAPPFRL   | YP_177963; PPE FAMILY PROTEIN                                                | 3,340030267 | 1,538360375 |
| QAQLISSQAQQGGQQ  | CAB06237.1; CONSERVED HYPOTHETICAL PROTEIN                                   | 3,339075582 | 1,236887404 |
| LQAHPHAVNGTAMRE  | MYCOBACTERIUM BOVIS MYCOCEROSIC ACID SYNTHASE GENE; M95808                   | 3,337000624 | 1,357036006 |
| PGYPVAGQVWEATAT  | CAB06500.1; IMMUNOGENIC PROTEIN MPT63                                        | 3,32944389  | 1,225800503 |
| MWLSPNGTIRNIGG   | CAA17111.1; PROBABLE ISOCITRATE DEHYDROGENASE                                | 3,327732928 | 1,362672629 |
| LAPDTVPLAGVVL    | CAA16030.1; PROBABLE MOLYBDOPTERIN-GUANINE DINUCLEOTIDE BIOSYNTHESIS PROTEIN | 3,30935192  | 1,257127895 |
| LGDVGEAFVDSLTSQ  | PROBABLE CUTINASE PRECURSOR CFP21 NP_216500                                  | 3,307123473 | 1,596342397 |
| IGLSMAGSSAMILAA  | CAB10044.1; SECRETED ANTIGEN 85-B FBPB (85B)                                 | 3,301643613 | 1,201574684 |
| LPADTAAQLTSAGRE  | MTB48 AAK31576                                                               | 3,290558179 | 1,273146998 |
| TAQTLQAFLHWAITD  | PERIPLASMIC PHOSPHATE-BINDING LIPOPROTEIN PSTS1 YP_177770                    | 3,267335637 | 1,258025181 |
| FGLQLELTEGMRFDK  | 60 kDa chaperonin 2 P0A521                                                   | 3,258657142 | 1,238047797 |
| LMILIATNLLGQNT   | CAE55371.1; PPE FAMILY PROTEIN                                               | 3,234562697 | 1,308607794 |
| DGYPIINYEYAVN    | PERIPLASMIC PHOSPHATE-BINDING LIPOPROTEIN PSTS1 YP_177770                    | 3,205355936 | 1,182148257 |
| FLGGFAGLPSLGFNG  | CAB06237.1; CONSERVED HYPOTHETICAL PROTEIN                                   | 3,203788718 | 1,24289223  |
| ADEEQQALSSQMGF   | CAA17966.1; 10 KDA CULTURE FILTRATE ANTIGEN ESXB                             | 3,201730961 | 1,216068513 |
| WLSANRAVKPTGSAA  | CAB10044.1; SECRETED ANTIGEN 85-B FBPB (85B)                                 | 3,188504025 | 1,201013879 |
| ITSAGRHPDSDIFLD  | CAB01474.1; CONSERVED HYPOTHETICAL PROTEIN CFP17                             | 3,178927462 | 1,205186836 |
| VTVTGQGNLSLKV    | CAA98373.1; MAJOR SECRETED IMMUNOGENIC PROTEIN                               | 3,175083854 | 1,220301187 |
| AFLHWAITDGNKASF  | PERIPLASMIC PHOSPHATE-BINDING LIPOPROTEIN PSTS1 YP_177770                    | 3,172954376 | 1,231614409 |
| VLCNNGSPTTQQALA  | POSSIBLE GLYCOSYL TRANSFERASE CAB05418                                       | 3,161437936 | 1,167273448 |
| ASFLDQVHFQPLPPA  | PERIPLASMIC PHOSPHATE-BINDING LIPOPROTEIN PSTS1 YP_177770                    | 3,157875045 | 1,2905779   |
| LLDIYRKLRPGEPT   | RNA POLYMERASE BETA-SUBUNIT AAA21416                                         | 3,148263079 | 1,327553186 |
| QNAGGHTPTTYKAF   | CAA98382.1; IMMUNOGENIC PROTEIN MPT64                                        | 3,128768113 | 2,131662258 |
| AQAQHLTMANIYVSA  | PERIPLASMIC PHOSPHATE-BINDING LIPOPROTEIN PSTS3 YP_177768                    | 3,125150591 | 1,195761817 |
| LEPGVVAEKVRNLPA  | 60 kDa chaperonin 2 P0A521                                                   | 3,111776807 | 1,229392988 |
| GVPSRLGYLLDLAPK  | RNA POLYMERASE BETA-SUBUNIT AAA21417                                         | 3,110843745 | 2,243846408 |
| FPHHPHIVTVPSEVL  | POSSIBLE GLYCOSYL TRANSFERASE CAB05418                                       | 3,110761094 | 1,413178556 |

|                  |                                                                              |              |             |
|------------------|------------------------------------------------------------------------------|--------------|-------------|
| IAFLAGCSSTKPVSQ  | CAA98350.1; CELL SURFACE LIPOPROTEIN MPT83                                   | 3,106179311  | 1,235403909 |
| PPTPISVIFRSKSG   | PERIPLASMIC PHOSPHATE-BINDING LIPOPROTEIN PSTS2 YP_177769                    | 3,097047657  | 1,187984157 |
| QSGGNNSPAVYLLDG  | CAB10044.1; SECRETED ANTIGEN 85-B FBPB (85B)                                 | 3,093192001  | 1,178910156 |
| QSLGDNNGYIIPDE   | PERIPLASMIC PHOSPHATE-BINDING LIPOPROTEIN PSTS3 YP_177768                    | 3,082781854  | 1,199339641 |
| LTTYILLPSQDLPLL  | PPE FAMILY PROTEIN CAE55504                                                  | 3,076699053  | 2,270394617 |
| LILTSYTSDEAMLDA  | TWO COMPONENT TRANSCRIPTIONAL REGULATORY PROTEIN DEVR NP_217649              | 3,076065886  | 1,211003625 |
| GNKASFLDQVHFQPL  | PERIPLASMIC PHOSPHATE-BINDING LIPOPROTEIN PSTS1 YP_177770                    | 3,065912657  | 1,272041941 |
| SAFAAKAGLMRHTIG  | CONSERVED HYPOTHETICAL PROTEIN TB9.8 CAD93159                                | 3,053479759  | 1,158366214 |
| SAERCGSPAOWLPTV  | PERIPLASMIC PHOSPHATE-BINDING LIPOPROTEIN PSTS2 YP_177769                    | 3,027222134  | 1,298749663 |
| KGLMNIALISAQQV   | PERIPLASMIC PHOSPHATE-BINDING LIPOPROTEIN PSTS1 YP_177770                    | 3,023121017  | 1,163210728 |
| QSVCPILAEPPGGSFN | CONSERVED HYPOTHETICAL PROTEIN CAA15739                                      | 3,018149855  | 1,204792503 |
| VCAVDMPLYLVELIE  | CAA16030.1; PROBABLE MOLYBDOPTERIN-GUANINE DINUCLEOTIDE BIOSYNTHESIS PROTEIN | 3,016545971  | 1,561980797 |
| DVVQHVARRPGESPP  | MYCOBACTERIUM BOVIS ACYL-COA SYNTHASE GENE; U75685                           | 3,015671163  | 1,278025275 |
| GYPVHKPVTAGWNGY  | CONSERVED HYPOTHETICAL PROTEIN CAB08634                                      | 3,012111853  | 1,158727608 |
| QEAGNFERISGLKT   | CAA17966.1; 10 KDA CULTURE FILTRATE ANTIGEN ESXB                             | 3,007125532  | 1,181144787 |
| PVIAENRAELMILIA  | CAE55371.1; PPE FAMILY PROTEIN                                               | 3,005612498  | 1,173936112 |
| ISMIDGPAPDGYPII  | PERIPLASMIC PHOSPHATE-BINDING LIPOPROTEIN PSTS1 YP_177770                    | 3,005418763  | 1,221429185 |
| TDVIPETDGAKEGPT  | MTB81                                                                        | 3,002446553  | 1,349117711 |
| YHVAVAGTSPANVVG  | CAA98373.1; MAJOR SECRETED IMMUNOGENIC PROTEIN                               | 2,998347757  | 1,158727608 |
| ILKDESYKVTGTAPI  | CAB08889.1; IRON-REGULATED CONSERVED HYPOTHETICAL PROTEIN                    | 2,995338559  | 1,216757313 |
| HGTCANQCPIVDAGD  | RNA POLYMERASE BETA-SUBUNIT AAA21416                                         | 2,988744517  | 1,270881516 |
| NAFLTALTNAGIAYD  | CAB10947.1; PROBABLE LIPOPROTEIN LPRJ                                        | 2,985448864  | 1,235463484 |
| DSIYYVDANASIQEM  | HYPOTHETICAL PROTEIN RV2626C NP_217142                                       | 2,978585453  | 1,186318964 |
| AAQAVQTAQNGVRA   | CAE55371.1; PPE FAMILY PROTEIN                                               | 2,968766547  | 1,226101594 |
| PAEFLENFVRSSNLK  | CAB10044.1; SECRETED ANTIGEN 85-B FBPB (85B)                                 | 2,963694769  | 1,208556386 |
| TPPAPAPPPFRLPLL  | YP_177963; PPE FAMILY PROTEIN                                                | 2,962157075  | 5,003206502 |
| KTINLCPADDPICGT  | PROBABLE CUTINASE PRECURSOR CFP21 NP_216500                                  | 2,954247002  | 1,175523886 |
| YNANGSGAGVTQFLN  | PERIPLASMIC PHOSPHATE-BINDING LIPOPROTEIN PSTS2 YP_177769                    | 2,952168417  | 1,160137969 |
| RSCPGYTLDYANGS   | PERIPLASMIC PHOSPHATE-BINDING LIPOPROTEIN PSTS2 YP_177769                    | 2,950124484  | 1,184885013 |
| AGAGTVATTPASSPV  | PERIPLASMIC PHOSPHATE-BINDING LIPOPROTEIN PSTS1 YP_177770                    | 2,947458296  | 1,219207153 |
| IWKLIKDMLILPYLD  | CAA17111.1; PROBABLE ISOCITRATE DEHYDROGENASE                                | 2,939266202  | 1,26928518  |
| AYVITSVDEEMRHNE  | RNA POLYMERASE BETA'-SUBUNIT AAA21417                                        | 2,931773398  | 1,211631869 |
| DRFADFPALPLDPSA  | CAB09453.1; PROBABLE SERINE PROTEASE PEPA                                    | 2,928754666  | 1,182858938 |
| VGNVGLSTIAGRLLG  | CAB08889.1; IRON-REGULATED CONSERVED HYPOTHETICAL PROTEIN                    | 2,928257998  | 1,219082627 |
| FGDVAHAGAMIRAQA  | PUTATIVE ESAT-6 LIKE PROTEIN ESXN YP_177838                                  | 2,923999807  | 1,185013956 |
| VHNVAALPGAAYCEM  | MYCOBACTERIUM BOVIS MYCOCEROSIC ACID SYNTHASE GENE; M95808                   | 2,923964425  | 1,154112332 |
| TAVLLCCSGVATAA   | CAA98382.1; IMMUNOGENIC PROTEIN MPT64                                        | 2,920743115  | 1,206995716 |
| LAALPDFLGGFAGLP  | CAB06237.1; CONSERVED HYPOTHETICAL PROTEIN                                   | 2,917871383  | 1,288715308 |
| TVIAATAGRNHLKNV  | POSSIBLE GLYCOSYL TRANSFERASE CAB05418                                       | 2,912023904  | 1,192106149 |
| IVMSTNNDPAGACR   | 3-OXOACYL-[ACYL-CARRIER PROTEIN] SYNTHASE 2 KASB CAA94642                    | 2,89912101   | 1,20047952  |
| DPRYNQLLGLPFRFH  | POSSIBLE GLYCOSYL TRANSFERASE CAB05415                                       | 2,883700431  | 1,179960428 |
| MNIALAISQAQVNYN  | PERIPLASMIC PHOSPHATE-BINDING LIPOPROTEIN PSTS1 YP_177770                    | 2,879796278  | 1,177018598 |
| WSFAVGKQLNMAQII  | PERIPLASMIC PHOSPHATE-BINDING LIPOPROTEIN PSTS2 YP_177769                    | 2,879236187  | 1,196378184 |
| YTFKEDEYPSTAYLQ  | MYCOBACTERIUM BOVIS ACYL-COA SYNTHASE GENE; U75685                           | 2,879175615  | 1,299438787 |
| GASVTVTGQGNLSKV  | CAA98373.1; MAJOR SECRETED IMMUNOGENIC PROTEIN                               | 2,879140981  | 1,163393009 |
| ATIPQGEQSTGKIYF  | CAB06500.1; IMMUNOGENIC PROTEIN MPT63                                        | 2,874760041  | 1,191895829 |
| TAALRAAEDDCPPPG  | MYCOBACTERIUM BOVIS MYCOCEROSIC ACID SYNTHASE GENE; M95808                   | 2,871508551  | 1,146331184 |
| AGFTAPATLLSALG   | YP_177963; PPE FAMILY PROTEIN                                                | 2,863206106  | 1,469672565 |
| MAEDVRAEIVASVLE  | CAB08316.1; BIOTINYLATED PROTEIN TB7.3                                       | 2,862835875  | 1,235696419 |
| ALTGLGDKFGESIVN  | MCE-FAMILY PROTEIN MCE1AYP_177701                                            | 2,860193555  | 1,300904653 |
| WHRRRVIEPIDMDAY  | MTB81 (publication)                                                          | -7,977690023 | 0,393926473 |
| TRLGIRLVIVLVRW   | POSSIBLE GLYCOSYL TRANSFERASE CAB05419                                       | -7,878118104 | 0,522570785 |
| IPIDIPPIDIPASTI  | YP_177963; PPE FAMILY PROTEIN                                                | -6,85023435  | 0,686345944 |
| KRLPMSTRLGIRLVI  | POSSIBLE GLYCOSYL TRANSFERASE CAB05419                                       | -6,741303355 | 0,574535454 |
| EPGVPGRSVSRWGGF  | MYCOBACTERIUM BOVIS MYCOCEROSIC ACID SYNTHASE GENE; M95808                   | -6,697487634 | 0,580394207 |
| IQVAIPLTSATLGGL  | YP_177963; PPE FAMILY PROTEIN                                                | -6,581101808 | 0,707024085 |
| CIECPDGTGVEIWHVH | MYCOBACTERIUM BOVIS ACYL-COA SYNTHASE GENE; U75685                           | -6,358414308 | 0,583806535 |
| LALRDQVIPPTLNLV  | 3-OXOACYL-[ACYL-CARRIER PROTEIN] SYNTHASE 2 KASB CAA94642                    | -6,174626856 | 0,732640634 |
| NMSGWNNQAHTALAG  | YP_177963; PPE FAMILY PROTEIN                                                | -6,009783795 | 0,560224326 |
| AAAAMAAAATPYVGW  | PPE FAMILY PROTEIN CAE55334                                                  | -5,899224666 | 0,572044128 |
| GFGPIAVPSVTIPAL  | YP_177963; PPE FAMILY PROTEIN                                                | -5,872792378 | 0,697076072 |
| PPIVFLPSMTIGGQT  | YP_177963; PPE FAMILY PROTEIN                                                | -5,844150874 | 0,773709564 |
| GNFGAGSSGWWNQAHA | YP_177963; PPE FAMILY PROTEIN                                                | -5,701177999 | 0,625028336 |
| SQVGTAVKAFQLQSTI | PERIPLASMIC PHOSPHATE-BINDING LIPOPROTEIN PSTS3 YP_177768                    | -5,588282549 | 0,75128722  |

|                  |                                                                           |              |             |
|------------------|---------------------------------------------------------------------------|--------------|-------------|
| VGWANMGLGNIGFGN  | YP_177963; PPE FAMILY PROTEIN                                             | -5,47613507  | 0,722184313 |
| APGCWQPITRDLWPA  | MCE-FAMILY PROTEIN MCE1AYP_177701                                         | -5,47423812  | 0,58374356  |
| CAMFTDLLAQPTPAW  | PUTATIVE CYCLOPROPANE-FATTY-ACYL-PHOSPHOLIPID SYNTHASE<br>UFAA1 NP_854118 | -5,425741858 | 0,529908514 |
| AEHTGKLVLDVPRSG  | MYCOBACTERIUM BOVIS MYCOCEROSIC ACID SYNTHASE GENE; M95808                | -5,306983761 | 0,634503903 |
| FGNFGANMSGWVNQA  | YP_177963; PPE FAMILY PROTEIN                                             | -5,23042175  | 0,590999338 |
| EGVTGHQVGDVGGF   | MYCOBACTERIUM BOVIS MYCOCEROSIC ACID SYNTHASE GENE; M95808                | -5,207458819 | 0,637440969 |
| GFGNFGAGSSGWWNQ  | YP_177963; PPE FAMILY PROTEIN                                             | -5,165235502 | 0,53674499  |
| FAHWPRAGLPSAI    | MYCOBACTERIUM BOVIS MYCOCEROSIC ACID SYNTHASE GENE; M95808                | -5,127146231 | 0,752019111 |
| GTPCALGSAKSNMGH  | MYCOBACTERIUM BOVIS MYCOCEROSIC ACID SYNTHASE GENE; M95808                | -5,12271031  | 0,545474831 |
| SNAVDTPDMLASTLT  | MYCOBACTERIUM BOVIS MYCOCEROSIC ACID SYNTHASE GENE; M95808                | -5,105028429 | 0,524860921 |
| IDKWHRRRVIEPIDM  | MTB81 (publication)                                                       | -5,062134837 | 0,628037561 |
| NEDVIVRELTEVQGE  | PROBABLE ISOCITRATE DEHYDROGENASE CAA16247                                | -5,031957593 | 0,785590376 |
| RSVSRVGGFLDDVAG  | MYCOBACTERIUM BOVIS MYCOCEROSIC ACID SYNTHASE GENE; M95808                | -4,989951623 | 0,646631039 |
| SDALRQATARQLATWV | MYCOBACTERIUM BOVIS MYCOCEROSIC ACID SYNTHASE GENE; M95808                | -4,982332949 | 0,732383702 |
| LGGGVAANLGRAASV  | CAE55371.1; PPE FAMILY PROTEIN                                            | -4,977263706 | 0,752498409 |
| YVIAGDIPLINIPPT  | YP_177963; PPE FAMILY PROTEIN                                             | -4,972580266 | 0,763786885 |
| ANHEYLGPVLWSPAG  | POSSIBLE GLYCOSYL TRANSFERASE CAB05415                                    | -4,922874027 | 0,587678958 |
| VDVFAHWPRAGLPLV  | MYCOBACTERIUM BOVIS MYCOCEROSIC ACID SYNTHASE GENE; M95808                | -4,89373758  | 0,78158946  |
| MLEMRTHVETETGIR  | MYCOBACTERIUM BOVIS MYCOCEROSIC ACID SYNTHASE GENE; M95808                | -4,889360013 | 0,735019525 |
| ISIPNNPLALASAS   | YP_177963; PPE FAMILY PROTEIN                                             | -4,889140073 | 0,802321204 |
| DELIDRDWSPKVFSG  | MYCOBACTERIUM BOVIS MYCOCEROSIC ACID SYNTHASE GENE; M95808                | -4,879828288 | 0,709308043 |
| GTAVLAGASLVAVSW  | POSSIBLE HEMOLYSIN-LIKE PROTEIN CAA17201                                  | -4,866213262 | 0,65133847  |
| LIATGEQVLVNEHLI  | CONSERVED HYPOTHETICAL PROTEIN CAB08634                                   | -4,726528798 | 0,66499837  |
| PMSTRLGIRLVIVLV  | POSSIBLE GLYCOSYL TRANSFERASE CAB05419                                    | -4,685977343 | 0,690026531 |
| GIRLVIVLVRWPKV   | POSSIBLE GLYCOSYL TRANSFERASE CAB05419                                    | -4,641480239 | 0,684143195 |
| VLWSPDVKPTWWHS   | POSSIBLE GLYCOSYL TRANSFERASE CAB05418                                    | -4,638316745 | 0,659365874 |
| TLTDALKSHGPGQTE  | MYCOBACTERIUM BOVIS MYCOCEROSIC ACID SYNTHASE GENE; M95808                | -4,60526696  | 0,587346652 |
| LTNATMPYVLELADH  | SECRETED L-ALANINE DEHYDROGENASE ALD CAA15575                             | -4,559720896 | 0,75694855  |
| TRQAQIVKPHDSGER  | MYCOBACTERIUM BOVIS MYCOCEROSIC ACID SYNTHASE GENE; M95808                | -4,5398754   | 0,816310403 |
| KLTAQVLTAPQCTH   | MYCOBACTERIUM BOVIS MYCOCEROSIC ACID SYNTHASE GENE; M95808                | -4,534385515 | 0,78368222  |
| TDEQAITAATAHATA  | MYCOBACTERIUM BOVIS MYCOCEROSIC ACID SYNTHASE GENE; M95808                | -4,51808827  | 0,664164467 |
| GAGSSGWWNQAAHAL  | YP_177963; PPE FAMILY PROTEIN                                             | -4,48663606  | 0,703376824 |
| ASTGQRSRGPSPKFRM | MYCOBACTERIUM BOVIS MYCOCEROSIC ACID SYNTHASE GENE; M95808                | -4,48614906  | 0,744503526 |
| FGANMSGWVNQAHTA  | YP_177963; PPE FAMILY PROTEIN                                             | -4,467565814 | 0,595440925 |
| VPGRSVSRWGGFLDD  | MYCOBACTERIUM BOVIS MYCOCEROSIC ACID SYNTHASE GENE; M95808                | -4,460064573 | 0,689737768 |
| GEIIVHGDVNGNGYW  | MYCOBACTERIUM BOVIS ACYL-COA SYNTHASE GENE; U75685                        | -4,457694816 | 0,658389207 |
| QIDIPALNPVTVGSV  | YP_177963; PPE FAMILY PROTEIN                                             | -4,454495314 | 0,786259657 |
| GTMKSQLWILAYEDH  | MTB81 (publication)                                                       | -4,410186348 | 0,592277135 |
| RGLERGLNALADAVK  | 60 kDa chaperonin 2 POA521                                                | -4,333916983 | 0,748260341 |
| SFNTGIGNGGTGSTG  | YP_177963; PPE FAMILY PROTEIN                                             | -4,332885809 | 0,815750498 |
| VLDDLNSRMPQSRHD  | MCE-FAMILY PROTEIN MCE1AYP_177701                                         | -4,277221669 | 0,689118528 |
| ERYPEWNEGVKGAUV  | CONSERVED HYPOTHETICAL PROTEIN TB18.5CAD93033                             | -4,269413392 | 0,60265187  |
| DEVFARMWELYLAYS  | PUTATIVE CYCLOPROPANE-FATTY-ACYL-PHOSPHOLIPID SYNTHASE<br>UFAA1 NP_854118 | -4,258584888 | 0,726920542 |
| TPIGDPIEYRSLARV  | MYCOBACTERIUM BOVIS MYCOCEROSIC ACID SYNTHASE GENE; M95808                | -4,250415609 | 0,745217404 |
| YVAADAAAASYTYGF  | CONSERVED HYPOTHETICAL PROTEIN TB9.8 CAD93159                             | -4,217274253 | 0,687545434 |
| ISYMLPRSPIVRIVD  | MYCOBACTERIUM BOVIS ACYL-COA SYNTHASE GENE; U75685                        | -4,206825327 | 0,753331902 |
| INSVLMYSGAGSSPL  | YP_177963; PPE FAMILY PROTEIN                                             | -4,187171109 | 0,766572955 |
| LSGSEEDETAWRNGD  | MYCOBACTERIUM BOVIS MYCOCEROSIC ACID SYNTHASE GENE; M95808                | -4,17239579  | 0,763738891 |
| DLPANHEYLGPVLWS  | POSSIBLE GLYCOSYL TRANSFERASE CAB05415                                    | -4,161997667 | 0,732910409 |
| VGTPGATIPAITFPE  | YP_177963; PPE FAMILY PROTEIN                                             | -4,160236437 | 0,799829856 |
| LTIPGLSLDAVSEI   | YP_177963; PPE FAMILY PROTEIN                                             | -4,155198128 | 0,82945517  |
| QASSPMVGTLSGLGN  | YP_177963; PPE FAMILY PROTEIN                                             | -4,124039724 | 0,738438182 |
| AANLGDNLNLGLNIG  | YP_177963; PPE FAMILY PROTEIN                                             | -4,119920787 | 0,824807034 |
| GDVGTSVLSWLSDHQ  | MYCOBACTERIUM BOVIS MYCOCEROSIC ACID SYNTHASE GENE; M95808                | -4,118100841 | 0,681292571 |
| ATMPYVLELADHGWR  | SECRETED L-ALANINE DEHYDROGENASE ALD CAA15575                             | -4,113085135 | 0,653979296 |
| EQVLAERLAGWQERY  | HYPOTHETICAL PROTEIN RV2623 NP_217139                                     | -4,106338391 | 0,70789415  |
| AVRWPDWPPTTFGYH  | POSSIBLE HEMOLYSIN-LIKE PROTEIN CAA17201                                  | -4,061143621 | 0,712233687 |
| EYVVAFLGALQAGRI  | MYCOBACTERIUM BOVIS ACYL-COA SYNTHASE GENE; U75685                        | -4,037209623 | 0,798570489 |
| EALPFAAIVGAALV   | CONSERVED HYPOTHETICAL PROTEIN CAB08634                                   | -4,009837033 | 0,760790007 |
| DRIPVHASTTIGP    | YP_177963; PPE FAMILY PROTEIN                                             | -3,98171913  | 0,733567849 |
| AGPINISIIDIPALP  | YP_177963; PPE FAMILY PROTEIN                                             | -3,953655312 | 0,793180911 |
| LDAVERREATWRDVR  | CONSERVED HYPOTHETICAL PROTEIN CAB08634                                   | -3,945011151 | 0,745610463 |
| SLPQDEWAGRLRLL   | MYCOBACTERIUM BOVIS MYCOCEROSIC ACID SYNTHASE GENE; M95808                | -3,941861887 | 0,820437085 |
| WPRAQGLPVSIAIAGW | MYCOBACTERIUM BOVIS MYCOCEROSIC ACID SYNTHASE GENE; M95808                | -3,932855663 | 0,789734482 |

|                  |                                                                        |              |             |
|------------------|------------------------------------------------------------------------|--------------|-------------|
| PVLAINAHLTGNAAM  | YP_177963; PPE FAMILY PROTEIN                                          | -3,924762633 | 0,746625593 |
| APPIAHSTVLVAPV   | PPE FAMILY PROTEIN CAE55489                                            | -3,889123749 | 0,82262788  |
| ANMGLGNIGFGNTGT  | YP_177963; PPE FAMILY PROTEIN                                          | -3,887586504 | 0,836958406 |
| VVADKPEKEKASVPG  | 60 kDa chaperonin 2 P0A521                                             | -3,883446387 | 0,809213459 |
| SRWGGFLDDVAGFDA  | MYCOBACTERIUM BOVIS MYCOCEROSIC ACID SYNTHASE GENE; M95808             | -3,87959803  | 0,772067915 |
| CWAMQAYGAAAYTLQE | RNA POLYMERASE BETA-SUBUNIT AAA21416                                   | -3,860537931 | 0,758720787 |
| RRVIEPIDMDAYRQF  | MTB81 (publication)                                                    | -3,855791074 | 0,679812234 |
| AISDPLLSASGFAN   | YP_177963; PPE FAMILY PROTEIN                                          | -3,849649955 | 0,763441076 |
| PQSTVIGGTSDTVVD  | MYCOBACTERIUM BOVIS MYCOCEROSIC ACID SYNTHASE GENE; M95808             | -3,824229017 | 0,831646335 |
| SRGPSKFRMELLSLP  | MYCOBACTERIUM BOVIS MYCOCEROSIC ACID SYNTHASE GENE; M95808             | -3,823956285 | 0,758113449 |
| PEVATWLEVPPLPGV  | HYPOTHETICAL PROTEIN RV2623 NP_217139                                  | -3,806931281 | 0,765064016 |
| RFGEMECWAMQAYGA  | RNA POLYMERASE BETA-SUBUNIT AAA21416                                   | -3,805095458 | 0,677584646 |
| YIVKPKMHGPAEAVF  | MTB81 (publication)                                                    | -3,804251642 | 0,696314142 |
| EFPIHWTSTGGIGPI  | YP_177963; PPE FAMILY PROTEIN                                          | -3,790421089 | 0,750093863 |
| YTPFALLALPAHDGR  | POSSIBLE HEMOLYSIN-LIKE PROTEIN CAA17201                               | -3,781084082 | 0,730068036 |
| FRIEPIDVPAVLDI   | YP_177963; PPE FAMILY PROTEIN                                          | -3,769208893 | 0,785093984 |
| AIPIGLELNGGVGPI  | YP_177963; PPE FAMILY PROTEIN                                          | -3,768761582 | 0,796780928 |
| SGLYNIAIVGLGTPA  | YP_177963; PPE FAMILY PROTEIN                                          | -3,763699999 | 0,615548474 |
| RTIDADRSFIEYGLD  | MYCOBACTERIUM BOVIS MYCOCEROSIC ACID SYNTHASE GENE; M95808             | -3,761252796 | 0,770145603 |
| PVTAGWNGYGDFFQHT | CONSERVED HYPOTHETICAL PROTEIN CAB08634                                | -3,735927147 | 0,716207526 |
| AGMGNLGNAGSGN    | YP_177963; PPE FAMILY PROTEIN                                          | -3,735741874 | 0,823867314 |
| LNLGAANIGDVNLGF  | YP_177963; PPE FAMILY PROTEIN                                          | -3,723509207 | 0,826511729 |
| LPVSAIAWGAWGEVG  | MYCOBACTERIUM BOVIS MYCOCEROSIC ACID SYNTHASE GENE; M95808             | -3,721255739 | 0,788442057 |
| HDTLDAVERREATWR  | CONSERVED HYPOTHETICAL PROTEIN CAB08634                                | -3,698316163 | 0,577199554 |
| GPVLWSPAGKPPTWW  | POSSIBLE GLYCOSYL TRANSFERASE CAB05415                                 | -3,688163603 | 0,688874078 |
| TGSIALAITNTARPW  | PPE FAMILY PROTEIN CAE55334                                            | -3,686084576 | 0,755231612 |
| LVHAVSPEVATWLEV  | HYPOTHETICAL PROTEIN RV2623 NP_217139                                  | -3,682993475 | 0,836598483 |
| PLTLVHAVSPEVATW  | HYPOTHETICAL PROTEIN RV2623 NP_217139                                  | -3,682478837 | 0,84240897  |
| SGLGALPGIGNILG   | YP_177963; PPE FAMILY PROTEIN                                          | -3,674644112 | 0,845111103 |
| LWSPAGKPPTWWDSL  | POSSIBLE GLYCOSYL TRANSFERASE CAB05415                                 | -3,657732882 | 0,699884776 |
| LMSVTQPDREVRELLA | MYCOBACTERIUM BOVIS MYCOCEROSIC ACID SYNTHASE GENE; M95808             | -3,647438973 | 0,680060513 |
| LAHLGFDEVFARMWE  | PUTATIVE CYCLOPROPANE-FATTY-ACYL-PHOSPHOLIPID SYNTHASE UFAA1 NP_854118 | -3,629301324 | 0,697474586 |
| QLLTIPLAKELAWAP  | MTB81 (publication)                                                    | -3,603599133 | 0,772774144 |
| ASVILRRITIDARSP  | MYCOBACTERIUM BOVIS MYCOCEROSIC ACID SYNTHASE GENE; M95808             | -3,584639086 | 0,793443532 |
| NLGLADVGSVNVGFG  | YP_177963; PPE FAMILY PROTEIN                                          | -3,571369491 | 0,845321123 |
| TGHQVGDVRVGGFSEG | MYCOBACTERIUM BOVIS MYCOCEROSIC ACID SYNTHASE GENE; M95808             | -3,566179562 | 0,711955944 |
| CPDGTVGEIWWHGDN  | MYCOBACTERIUM BOVIS ACYL-COA SYNTHASE GENE; U75685                     | -3,563738637 | 0,645718137 |
| PNDQAGLEKLGSQLR  | MYCOBACTERIUM BOVIS MYCOCEROSIC ACID SYNTHASE GENE; M95808             | -3,551896943 | 0,792664934 |
| NIISGIPTLSTGPV   | YP_177963; PPE FAMILY PROTEIN                                          | -3,539531845 | 0,824648824 |
| TGKLVLDVPRSGRRS  | MYCOBACTERIUM BOVIS MYCOCEROSIC ACID SYNTHASE GENE; M95808             | -3,53948196  | 0,808785429 |
| PYAVEYVWGRQVGDN  | MCE-FAMILY PROTEIN MCE1AYP_177701                                      | -3,531853784 | 0,776077832 |
| IIPDTTILPPIHGL   | YP_177963; PPE FAMILY PROTEIN                                          | -3,520255727 | 0,800513737 |
| GSYIYVVKPMHGPAE  | MTB81 (publication)                                                    | -3,519690205 | 0,692864136 |
| SGTANFLFNLSGSYN  | YP_177963; PPE FAMILY PROTEIN                                          | -3,512158326 | 0,850074279 |
| SGIAMAVVGGALLYL  | CAB06237.1; CONSERVED HYPOTHETICAL PROTEIN                             | -3,512045996 | 0,750934617 |
| LEEFDHQLTRIELRR  | 3-OXOACYL-[ACYL-CARRIER PROTEIN] SYNTHASE 2 KASB CAA94642              | -3,5109865   | 0,78742779  |
| PITRDLWPAPYLVMD  | MCE-FAMILY PROTEIN MCE1AYP_177701                                      | -3,485875774 | 0,715819981 |
| LNSGLVNVGSGISGL  | YP_177963; PPE FAMILY PROTEIN                                          | -3,484476542 | 0,81301396  |
| TIPLAKELAWAPDEI  | MTB81 (publication)                                                    | -3,473145011 | 0,837246828 |
| AETTWKLLLDQRSGI  | 3-OXOACYL-[ACYL-CARRIER PROTEIN] SYNTHASE 2 KASB CAA94642              | -3,470564498 | 0,867400783 |
| AASVGATSEIEPFIV  | YP_177963; PPE FAMILY PROTEIN                                          | -3,469337406 | 0,821376338 |
| QAGLEKLGSQLRGRD  | MYCOBACTERIUM BOVIS MYCOCEROSIC ACID SYNTHASE GENE; M95808             | -3,463759968 | 0,739666898 |
| ATLAQLPPGILSDIL  | PPE FAMILY PROTEIN CAE55334                                            | -3,455996475 | 0,702505753 |
| IEPFIVWSSGAIGP   | YP_177963; PPE FAMILY PROTEIN                                          | -3,451124196 | 0,842272705 |
| RPAVYAPKSALGHSV  | 3-OXOACYL-[ACYL-CARRIER PROTEIN] SYNTHASE 2 KASB CAA94642              | -3,444563885 | 0,820134662 |
| GPIIPDTTILPPIH   | YP_177963; PPE FAMILY PROTEIN                                          | -3,428421435 | 0,83422836  |
| TAQENAMEQFVYAYV  | PERIPLASMIC PHOSPHATE-BINDING LIPOPROTEIN PSTS2 YP_177769              | -3,424520118 | 0,707454626 |
| KSHGPQGTecasLSW  | MYCOBACTERIUM BOVIS MYCOCEROSIC ACID SYNTHASE GENE; M95808             | -3,423423527 | 0,721930646 |
| TDSFEWLIGSPRWRE  | RNA POLYMERASE BETA-SUBUNIT AAA21416                                   | -3,420992251 | 0,783092146 |
| PSIPLGFAAIGHIP   | YP_177963; PPE FAMILY PROTEIN                                          | -3,411144805 | 0,601587185 |
| KSFQAKLAAAVNAIS  | PERIPLASMIC PHOSPHATE-BINDING LIPOPROTEIN PSTS2 YP_177769              | -3,401878841 | 0,789566805 |
| QVGDRVGGFSEGGCW  | MYCOBACTERIUM BOVIS MYCOCEROSIC ACID SYNTHASE GENE; M95808             | -3,401437497 | 0,755701118 |
| DEDELPAVGNELVRV  | RNA POLYMERASE BETA-SUBUNIT AAA21416                                   | -3,401332371 | 0,860608022 |
| NVGFNGSLGAALGI   | YP_177963; PPE FAMILY PROTEIN                                          | -3,398533577 | 0,84967499  |
| IVGASNSTGMSGGFV  | YP_177963; PPE FAMILY PROTEIN                                          | -3,397731326 | 0,836129271 |

|                  |                                                                           |              |             |
|------------------|---------------------------------------------------------------------------|--------------|-------------|
| LPTVVDIRIPVELHA  | YP_177963; PPE FAMILY PROTEIN                                             | -3,385460538 | 0,830259135 |
| PFAAIVGAALVRDD   | CONSERVED HYPOTHETICAL PROTEIN CAB08634                                   | -3,385116365 | 0,82250264  |
| ERLLRAIFGEKAREV  | RNA POLYMERASE BETA-SUBUNIT AAA21416                                      | -3,381286707 | 0,758733301 |
| MRTHVETETGIRLTP  | MYCOBACTERIUM BOVIS MYCOCEROSIC ACID SYNTHASE GENE; M95808                | -3,372194997 | 0,818432223 |
| HVLEIGTGWGEICIR  | PUTATIVE CYCLOPROPANE-FATTY-ACYL-PHOSPHOLIPID SYNTHASE<br>UFAA1 NP_854118 | -3,368540712 | 0,848464499 |
| PLGFAAIGHIGPISI  | YP_177963; PPE FAMILY PROTEIN                                             | -3,363981649 | 0,836774407 |
| TVEVTADAASIMAIIV | CONSERVED HYPOTHETICAL PROTEIN TB18.5CAD93033                             | -3,362388462 | 0,794266407 |
| TVIGGTSDTVDRDLIA | MYCOBACTERIUM BOVIS MYCOCEROSIC ACID SYNTHASE GENE; M95808                | -3,35506598  | 0,793227731 |
| EGPNIIGLIGLSVYA  | RNA POLYMERASE BETA-SUBUNIT AAA21416                                      | -3,350285965 | 0,780174935 |
| MVAPDPNGERAGHAI  | 3-OXOACYL-[ACYL-CARRIER PROTEIN] SYNTHASE 2 KASB CAA94642                 | -3,345854553 | 0,653023489 |
| GGPVAIQAITMPHHR  | PUTATIVE CYCLOPROPANE-FATTY-ACYL-PHOSPHOLIPID SYNTHASE<br>UFAA1 NP_854118 | -3,337308215 | 0,71422506  |
| PGATIPAITFPEIPA  | YP_177963; PPE FAMILY PROTEIN                                             | -3,326350355 | 0,812299069 |
| ETVGVEAHGTGTPI   | MYCOBACTERIUM BOVIS MYCOCEROSIC ACID SYNTHASE GENE; M95808                | -3,32316333  | 0,840622835 |
| NPAKRAMLDRDMGVEH | MYCOBACTERIUM BOVIS MYCOCEROSIC ACID SYNTHASE GENE; M95808                | -3,321655881 | 0,664767512 |
| RAAVAAFEAALAATV  | YP_177963; PPE FAMILY PROTEIN                                             | -3,320911006 | 0,856207142 |
| VLNVGTLNSGVLVNG  | YP_177963; PPE FAMILY PROTEIN                                             | -3,316904482 | 0,828835136 |
| SLMFVRNVGHLMTND  | MTB81 (publication)                                                       | -3,312815623 | 0,816963737 |
| HETMVIPPIVFLPSM  | YP_177963; PPE FAMILY PROTEIN                                             | -3,304522698 | 0,599950009 |
| PGNVNTGWFNAGHTN  | YP_177963; PPE FAMILY PROTEIN                                             | -3,273753908 | 0,712488405 |
| QQDHGRHLIDDALKV  | HYPOTHETICAL PROTEIN RV2623 NP_217139                                     | -3,267030283 | 0,866011087 |
| DVQTDSEFWLIGSPR  | RNA POLYMERASE BETA-SUBUNIT AAA21416                                      | -3,263731604 | 0,861151219 |
| GGEVSILQPFVAPI   | YP_177963; PPE FAMILY PROTEIN                                             | -3,251171831 | 0,813372569 |
| PRLFVVTRQAQIVKP  | MYCOBACTERIUM BOVIS MYCOCEROSIC ACID SYNTHASE GENE; M95808                | -3,249078609 | 0,831953815 |
| TIYTLTDEAPLLAT   | PROBABLE ISOCITRATE DEHYDROGENASE CAA16247                                | -3,246615631 | 0,650493733 |
| TIPAITFPEIPANAD  | YP_177963; PPE FAMILY PROTEIN                                             | -3,238956164 | 0,829179187 |
| VNDALSGGLPPPWWQ  | PPE FAMILY PROTEIN CAE55504                                               | -3,238233783 | 0,686932316 |
| ARRRRILFVAEAVTL  | POSSIBLE GLYCOSYL TRANSFERASE CAB05415                                    | -3,220465919 | 0,794249534 |
| GGLALPLQQTIDAIE  | YP_177963; PPE FAMILY PROTEIN                                             | -3,218599282 | 0,818680452 |
| TWWDSLPTDRPIVYA  | POSSIBLE GLYCOSYL TRANSFERASE CAB05415                                    | -3,208029692 | 0,773045154 |
| FPVGPFFGLGVVNIS  | YP_177963; PPE FAMILY PROTEIN                                             | -3,201569019 | 0,817496876 |
| MARGIDDVVVSVVAS  | MYCOBACTERIUM BOVIS MYCOCEROSIC ACID SYNTHASE GENE; M95808                | -3,198353224 | 0,783189197 |
| RLVDAPLPAWTHARL  | MYCOBACTERIUM BOVIS MYCOCEROSIC ACID SYNTHASE GENE; M95808                | -3,196809999 | 0,851601152 |
| PFGLFPDWDVAEVAA  | PPE FAMILY PROTEIN CAE55504                                               | -3,192899778 | 0,781884133 |
| SLVAHMKPGAVLVDI  | SECRETED L-ALANINE DEHYDROGENASE ALD CAA15575                             | -3,192365202 | 0,878677187 |
| WQGDGTGTYQGWQQTQ | CAA16104.1; SECRETED ESAT-6 LIKE PROTEIN ESXR                             | -3,180591721 | 0,729294636 |
| TGNFSNGILWRGNYE  | YP_177963; PPE FAMILY PROTEIN                                             | -3,180220613 | 0,785885828 |
| GGFLDDVAGFDAEFF  | MYCOBACTERIUM BOVIS MYCOCEROSIC ACID SYNTHASE GENE; M95808                | -3,170309916 | 0,72840058  |
| AGLTLAYTAATITM   | POSSIBLE HEMOLYSIN-LIKE PROTEIN CAA17201                                  | -3,161428215 | 0,73203082  |
| QPLDWFCFLSSGAAL  | MYCOBACTERIUM BOVIS MYCOCEROSIC ACID SYNTHASE GENE; M95808                | -3,160807238 | 0,872516081 |
| AVVLDIHETMVIPPI  | YP_177963; PPE FAMILY PROTEIN                                             | -3,159279248 | 0,782915368 |
| ALSGGLPPPWPAL    | PPE FAMILY PROTEIN CAE55504                                               | -3,155771415 | 0,771416738 |
| PGPESMLAAAADWDG  | PPE FAMILY PROTEIN CAE55334                                               | -3,154145803 | 0,863168367 |
| GNTTTPVSSGFFNTG  | YP_177963; PPE FAMILY PROTEIN                                             | -3,149960583 | 0,85226891  |
| VLIAFGRFPIIDRE   | MYCOBACTERIUM BOVIS MYCOCEROSIC ACID SYNTHASE GENE; M95808                | -3,137678059 | 0,878219814 |
| LPIVRAFAEPAGIKI  | PROBABLE ISOCITRATE DEHYDROGENASE CAA16247                                | -3,134148491 | 0,86853694  |
| RACACLQPHDPAFTF  | MYCOBACTERIUM BOVIS ACYL-COA SYNTHASE GENE; U75685                        | -3,130895034 | 0,723351513 |
| LPRVNARGGPGGAPG  | MCE-FAMILY PROTEIN MCE1AYP_177701                                         | -3,115862551 | 0,869292104 |
| FDPREQVPCDGAYWV  | MYCOBACTERIUM BOVIS MYCOCEROSIC ACID SYNTHASE GENE; M95808                | -3,111285466 | 0,78825179  |
| KLAGRHHGNKGVIGKI | RNA POLYMERASE BETA-SUBUNIT AAA21416                                      | -3,110418544 | 0,873121778 |
| AWGAWGEVGRATFLA  | MYCOBACTERIUM BOVIS MYCOCEROSIC ACID SYNTHASE GENE; M95808                | -3,102833563 | 0,872328753 |
| IALLYASIATGSIAL  | PPE FAMILY PROTEIN CAE55334                                               | -3,099916767 | 0,821647855 |
| RQATTLALLAGVFG   | CAB10947.1; PROBABLE LIPOPROTEIN LPRJ                                     | -3,095099211 | 0,84924794  |
| YPLAEAADAIRAMSN  | MYCOBACTERIUM BOVIS MYCOCEROSIC ACID SYNTHASE GENE; M95808                | -3,092450842 | 0,679699496 |
| KPPTWWDLSLPTDRPI | POSSIBLE GLYCOSYL TRANSFERASE CAB05415                                    | -3,076596906 | 0,771761944 |
| TIPEFPIHWTSTGGI  | YP_177963; PPE FAMILY PROTEIN                                             | -3,074332658 | 0,748139712 |
| ATLFDPREQPVCDDGA | MYCOBACTERIUM BOVIS MYCOCEROSIC ACID SYNTHASE GENE; M95808                | -3,070611364 | 0,758716368 |
| RRILFVAEAVTLAHV  | POSSIBLE GLYCOSYL TRANSFERASE CAB05415                                    | -3,066118742 | 0,820522898 |
| IVIPTPIGELDVIAL  | PPE FAMILY PROTEIN CAE55334                                               | -3,061426739 | 0,797548048 |
| APQCTHYPLAEADA   | MYCOBACTERIUM BOVIS MYCOCEROSIC ACID SYNTHASE GENE; M95808                | -3,059236362 | 0,829602017 |
| AELSALLAAAGFGN   | MCE-FAMILY PROTEIN MCE1AYP_177701                                         | -3,059031463 | 0,820990245 |
| IPIPAIHDFDGAAD   | YP_177963; PPE FAMILY PROTEIN                                             | -3,049875639 | 0,814075489 |
| FPEIPANADGELYVI  | YP_177963; PPE FAMILY PROTEIN                                             | -3,049474623 | 0,823497914 |
| MREHDIGALPICGDD  | HYPOTHETICAL PROTEIN RV2626C NP_217142                                    | -3,049339391 | 0,737781004 |
| SINFADVLIAGFRFP  | MYCOBACTERIUM BOVIS MYCOCEROSIC ACID SYNTHASE GENE; M95808                | -3,046802306 | 0,844460122 |

|                  |                                                                        |              |             |
|------------------|------------------------------------------------------------------------|--------------|-------------|
| AVSPEVATWLEVPLP  | HYPOTHETICAL PROTEIN RV2623 NP_217139                                  | -3,046130652 | 0,820995476 |
| GAAQRAGLELLPFGG  | MYCOBACTERIUM BOVIS MYCO CEROSIC ACID SYNTHASE GENE; M95808            | -3,045909749 | 0,809419367 |
| GTAFLRLVLRDRNYT  | MTB81                                                                  | -3,03974115  | 0,777029731 |
| DALKSHGPGQTECAS  | MYCOBACTERIUM BOVIS MYCO CEROSIC ACID SYNTHASE GENE; M95808            | -3,039540242 | 0,792844761 |
| GNVGDFNLGAANLGD  | YP_177963; PPE FAMILY PROTEIN                                          | -3,038461686 | 0,831214255 |
| CSKVPDIHDVALMED  | MTB81                                                                  | -3,029235697 | 0,83199424  |
| GILWRGNYEGLAGFS  | YP_177963; PPE FAMILY PROTEIN                                          | -3,029144077 | 0,817167163 |
| LHALHYHQVDVAAVQ  | MTB81 (publication)                                                    | -3,029022556 | 0,875760866 |
| ISNFHSPSDVIDDAS  | PROBABLE ISOCITRATE DEHYDROGENASE CAA16247                             | -3,027880335 | 0,877600593 |
| WVFGGQSQWAAMGT   | MYCOBACTERIUM BOVIS MYCO CEROSIC ACID SYNTHASE GENE; M95808            | -3,026061966 | 0,731992904 |
| WQGDGTGYQAWQAQ   | CAA17363.1; LOW MOLECULAR WEIGHT PROTEIN ANTIGEN 7 ESXH                | -3,020949729 | 0,820481894 |
| DELQAQIDKWHRRRV  | MTB81                                                                  | -3,017902997 | 0,817201513 |
| DILVGKVTPKGETEL  | RNA POLYMERASE BETA-SUBUNIT AAA21416                                   | -3,017197581 | 0,800332091 |
| PFDLPTVVDIRPVE   | YP_177963; PPE FAMILY PROTEIN                                          | -3,008423826 | 0,833102289 |
| HQIPLGFQVPGSIDA  | YP_177963; PPE FAMILY PROTEIN                                          | -3,003339412 | 0,871580282 |
| LHSVKVIPSRGAWLE  | RNA POLYMERASE BETA-SUBUNIT AAA21416                                   | -3,002009962 | 0,801639394 |
| FNSGILWRGNYEGLA  | YP_177963; PPE FAMILY PROTEIN                                          | -2,99853645  | 0,793885605 |
| GQPVSRLVIRGEHRD  | CAA17343.1; HEAT SHOCK PROTEIN HSP                                     | -2,995767003 | 0,861172447 |
| ANSGNVDTGALMSGN  | YP_177963; PPE FAMILY PROTEIN                                          | -2,995338631 | 0,876255969 |
| DADRSFIEYGLDSL   | MYCOBACTERIUM BOVIS MYCO CEROSIC ACID SYNTHASE GENE; M95808            | -2,986803333 | 0,879494501 |
| LVTGKAFYVVVTGI   | 3-OXOACYL-[ACYL-CARRIER PROTEIN] SYNTHASE 2 KASB CAA94642              | -2,983513149 | 0,768702173 |
| VAAGFGHRVEIDL    | PUTATIVE CYCLOPROPANE-FATTY-ACYL-PHOSPHOLIPID SYNTHASE UFAA1 NP_854118 | -2,98274266  | 0,844885109 |
| RKHGLSSLGWDLCRI  | POSSIBLE GLYCOSYL TRANSFERASE CAB05418                                 | -2,974585333 | 0,593443274 |
| QRAGLELLPFGGRFV  | MYCOBACTERIUM BOVIS MYCO CEROSIC ACID SYNTHASE GENE; M95808            | -2,968527236 | 0,860280542 |
| LGSQLRGRDGVVIVY  | MYCOBACTERIUM BOVIS MYCO CEROSIC ACID SYNTHASE GENE; M95808            | -2,967713369 | 0,799805226 |
| DAEFCGRIHTRYSSA  | SECRETED L-ALANINE DEHYDROGENASE ALD CAA15575                          | -2,964818972 | 0,838367424 |
| EFDLVPRVIGHLL    | 3-OXOACYL-[ACYL-CARRIER PROTEIN] SYNTHASE 2 KASB CAA94642              | -2,95765668  | 0,864267002 |
| NAGDVAYRPMAPNFD  | MTB81                                                                  | -2,953293108 | 0,86873004  |
| TGDITPIPIPIHI    | YP_177963; PPE FAMILY PROTEIN                                          | -2,951860987 | 0,877164132 |
| ITGTRIDPIPLNFDV  | YP_177963; PPE FAMILY PROTEIN                                          | -2,946548793 | 0,860420859 |
| RNWLGLNKGDLAAAV  | MTB81                                                                  | -2,945377828 | 0,841053286 |
| PGFTIPTGPIHIGLP  | YP_177963; PPE FAMILY PROTEIN                                          | -2,942366696 | 0,845243696 |
| DAAKGVPDWAARLPD  | RNA POLYMERASE BETA-SUBUNIT AAA21416                                   | -2,941656386 | 0,892461976 |
| VLNSLTGAAQRAGLE  | MYCOBACTERIUM BOVIS MYCO CEROSIC ACID SYNTHASE GENE; M95808            | -2,930937479 | 0,845699732 |
| GTGTPIGDPIEYRSL  | MYCOBACTERIUM BOVIS MYCO CEROSIC ACID SYNTHASE GENE; M95808            | -2,926924819 | 0,787648857 |
| PPPQRAAMAAQLQAV  | LOW MOLECULAR WEIGHT T-CELL ANTIGEN TB8.4 NP_215690                    | -2,911737914 | 0,840604462 |
| FALLALPAHDGRVVL  | POSSIBLE HEMOLYSIN-LIKE PROTEIN CAA17201                               | -2,906493991 | 0,823730751 |
| AGSPEVDNRLMVISI  | 3-OXOACYL-[ACYL-CARRIER PROTEIN] SYNTHASE 2 KASB CAA94642              | -2,902112966 | 0,874942999 |
| NTRIVLGGYSQGATV  | PROBABLE CUTINASE PRECURSOR CFP21 NP_216500                            | -2,901489482 | 0,884338297 |
| ANRSRLMSLVAANIL  | PPE FAMILY PROTEIN CAE55334                                            | -2,88702449  | 0,805486857 |
| TAVAACHYIAMWVFW  | POSSIBLE HEMOLYSIN-LIKE PROTEIN CAA17201                               | -2,884487775 | 0,784671686 |
| VLADWDFNIRCFNSP  | POSSIBLE GLYCOSYL TRANSFERASE CAB05419                                 | -2,882895966 | 0,735910945 |
| FLALGAGFEDIGIKT  | PROBABLE ISOCITRATE DEHYDROGENASE CAA16247                             | -2,879490031 | 0,864893835 |
| GYVVRWVDQGVGCSK  | MTB81                                                                  | -2,874252389 | 0,782502817 |
| TVTIDKVPVAVFAV   | MYCOBACTERIUM BOVIS MYCO CEROSIC ACID SYNTHASE GENE; M95808            | -2,870184496 | 0,833750751 |
| GTGNIGFFNSGTGNW  | YP_177963; PPE FAMILY PROTEIN                                          | -2,869443987 | 0,849980214 |
| MAPNFDDSI AFLAAQ | MTB81                                                                  | -2,854075636 | 0,843307029 |
| LPLGLGLSGGTPPFD  | YP_177963; PPE FAMILY PROTEIN                                          | -2,850171103 | 0,849764137 |
| NTGGFNPSTNTGWF   | YP_177963; PPE FAMILY PROTEIN                                          | -2,850042114 | 0,86480222  |
| FAVPGDMPGGEVSI   | YP_177963; PPE FAMILY PROTEIN                                          | -2,848596564 | 0,848204503 |
| CWTLVSSRSARASSR  | MYCOBACTERIUM BOVIS MYCO CEROSIC ACID SYNTHASE GENE; M95808            | -2,848569275 | 0,789816579 |
| LVIVLVRWPKVISR   | POSSIBLE GLYCOSYL TRANSFERASE CAB05419                                 | -2,836868054 | 0,821151497 |
| TIGGQTYTIPLDTPP  | YP_177963; PPE FAMILY PROTEIN                                          | -2,832010431 | 0,822025173 |
| ATGFTVQDQGLVVAL  | MTB81                                                                  | -2,823693246 | 0,849406137 |
| FLLDQAITSAGRHPD  | CAB01474.1; CONSERVED HYPOTHETICAL PROTEIN CFP17                       | -2,821870586 | 0,822659656 |
| GFAVPDIPAIHID    | YP_177963; PPE FAMILY PROTEIN                                          | -2,814319606 | 0,809103725 |
| AQGLPVSAIWAAGAWG | MYCOBACTERIUM BOVIS MYCO CEROSIC ACID SYNTHASE GENE; M95808            | -2,811294741 | 0,856839955 |
| PAGRLVDAPLPAWTH  | MYCOBACTERIUM BOVIS MYCO CEROSIC ACID SYNTHASE GENE; M95808            | -2,811132491 | 0,82653376  |
| WAQELAAQTDDQQLA  | PROBABLE ISOCITRATE DEHYDROGENASE CAA16247                             | -2,800095559 | 0,869593256 |
| LGSFGQAYAAANSW   | MYCOBACTERIUM BOVIS MYCO CEROSIC ACID SYNTHASE GENE; M95808            | -2,799631118 | 0,791273241 |
| GPQGTECASLSWSVQ  | MYCOBACTERIUM BOVIS MYCO CEROSIC ACID SYNTHASE GENE; M95808            | -2,799597152 | 0,798137416 |
| MNCRAVDHLTRLVD   | CONSERVED HYPOTHETICAL PROTEIN CAB08634                                | -2,793288989 | 0,778448266 |
| GVLNSGVDISGMFNV  | YP_177963; PPE FAMILY PROTEIN                                          | -2,792326279 | 0,877373241 |
| GIVRIGAEVRDGDIL  | RNA POLYMERASE BETA-SUBUNIT AAA21416                                   | -2,790902181 | 0,73182861  |
| PYNHMEVGGSPYAVEY | MCE-FAMILY PROTEIN MCE1AYP_177701                                      | -2,790349876 | 0,742528254 |

|                  |                                                            |              |             |
|------------------|------------------------------------------------------------|--------------|-------------|
| EITGSTLVLDINETLN | YP_177963; PPE FAMILY PROTEIN                              | -2,788763747 | 0,711488252 |
| PTPIGELDVIALYIA  | PPE FAMILY PROTEIN CAE55334                                | -2,786721116 | 0,831422713 |
| TPGSITYNEWSFAQA  | PERIPLASMIC PHOSPHATE-BINDING LIPOPROTEIN PSTS3 YP_177768  | -2,77675836  | 0,739815139 |
| DPDSFWAGVDKVVAD  | MTB81                                                      | -2,776748082 | 0,745378443 |
| SGSTAQENAMEQFVY  | PERIPLASMIC PHOSPHATE-BINDING LIPOPROTEIN PSTS2 YP_177769  | -2,775316035 | 0,748105541 |
| TSTGGIGPIIPDIT   | YP_177963; PPE FAMILY PROTEIN                              | -2,775197692 | 0,864121774 |
| FSFFAVGPDGMPGGE  | YP_177963; PPE FAMILY PROTEIN                              | -2,765628636 | 0,822297957 |
| SEGGCWRFTLCDAN   | MYCOBACTERIUM BOVIS MYCOCEROSIC ACID SYNTHASE GENE; M95808 | -2,758393326 | 0,865358021 |
| GINYRVLWQAAGPDT  | CAB06500.1; IMMUNOGENIC PROTEIN MPT63                      | -2,752265033 | 0,836818079 |
| NADGELYVIAGDIPL  | YP_177963; PPE FAMILY PROTEIN                              | -2,743611558 | 0,789817279 |
| YLQSLPAHLRPLDE   | PPE FAMILY PROTEIN CAE55504                                | -2,743170572 | 0,868746704 |
| RSGRRSVAVTPEQRP  | MYCOBACTERIUM BOVIS MYCOCEROSIC ACID SYNTHASE GENE; M95808 | -2,741850957 | 0,864278325 |
| SLAHFADGWNTFNLT  | MTB48 AAK31576                                             | -2,737532922 | 0,790848624 |
| PLTIDIDGQIDGFST  | YP_177963; PPE FAMILY PROTEIN                              | -2,733579275 | 0,856021963 |
| QDEWAGRLRRLVEQ   | MYCOBACTERIUM BOVIS MYCOCEROSIC ACID SYNTHASE GENE; M95808 | -2,728793042 | 0,869269784 |
| DTPPNDAQGLEKLS   | MYCOBACTERIUM BOVIS MYCOCEROSIC ACID SYNTHASE GENE; M95808 | -2,726771959 | 0,816248238 |
| LAKELAWAPDEIRIEE | MTB81                                                      | -2,724639047 | 0,867206115 |
| REQPVCDCGAYWVDNL | MYCOBACTERIUM BOVIS MYCOCEROSIC ACID SYNTHASE GENE; M95808 | -2,717266352 | 0,878766459 |
| DYSALYPAGRLVDAP  | MYCOBACTERIUM BOVIS MYCOCEROSIC ACID SYNTHASE GENE; M95808 | -2,716185962 | 0,809328202 |
| MSGGFVTAPTQGILI  | YP_177963; PPE FAMILY PROTEIN                              | -2,713502485 | 0,855242486 |
| VEHVYDSRSVEFAEQ  | MYCOBACTERIUM BOVIS MYCOCEROSIC ACID SYNTHASE GENE; M95808 | -2,711688174 | 0,877841057 |
| WMHLMASDFHAFSAA  | MYCOBACTERIUM BOVIS ACYL-COA SYNTHASE GENE; U75685         | -2,709535161 | 0,815426548 |
| AGVNELVRVYVAQKR  | RNA POLYMERASE BETA-SUBUNIT AAA21416                       | -2,708687035 | 0,866858883 |
| DVPRSGRRSVAVTPE  | MYCOBACTERIUM BOVIS MYCOCEROSIC ACID SYNTHASE GENE; M95808 | -2,702215351 | 0,861398978 |
| GDVLVDADGKAMLFD  | RNA POLYMERASE BETA-SUBUNIT AAA21416                       | -2,698728865 | 0,845657119 |
| MRESFAERGVTLGAA  | MYCOBACTERIUM BOVIS MYCOCEROSIC ACID SYNTHASE GENE; M95808 | -2,680320564 | 0,858515307 |
| FAPNLGERLIHRDT   | POSSIBLE GLYCOSYL TRANSFERASE CAB05419                     | -2,676180043 | 0,83333613  |
| DVLAAGDFWGGAGSV  | PUTATIVE ESAT-6 LIKE PROTEIN ESXN YP_177838                | -2,673770913 | 0,815865195 |
| YAEYQQRSEKVLTEY  | MTB48 AAK31576                                             | -2,67201692  | 0,565350017 |
