# Supplementary material for: Pattern Recognition in Pulmonary Tuberculosis Defined by High Content Peptide Microarray Chip Analysis Representing 61 Proteins from M. tuberculosis
Source: PubMed Central journal article supplement (PMC2588537; doi:10.1371/journal.pone.0003840), 2008-12-09
Supplement: pone.0003840.s004.pdf [file pone.0003840.s004.pdf]

**Supplementary Table 4. Top 24 peptides recognized by TB+ patients(n=35) but not by TB- controls (n=34) and vice versa**

| Target Protein                                                           | Only in TB + individuals<br>aa sequence and peptide location      | Only in TB- individuals<br>aa sequence and peptide location        |
|--------------------------------------------------------------------------|-------------------------------------------------------------------|--------------------------------------------------------------------|
| SECRETED ANTIGEN 85-B FBPB (85B) CAB10044 Rv1886c                        | QSSFYSDWYSPACGK 39                                                | YNGWDINTPAFEWYY 030<br>SPACGKAGCQTYKWE 042                         |
| PROBABLE LIPOPROTEIN LPRJ CAB10947 Rv1690                                | MTAHTHDGTRTWRTG 1                                                 |                                                                    |
| POSSIBLE GLYCOSYL TRANSFERASE CAB05415 Rv2962c                           | YRLERPLLALQCMP 204<br>VRRRHGLSSLGWNLC 210<br>RHGLSSLGWNLCRIF 211  |                                                                    |
| POSSIBLE GLYCOSYL TRANSFERASE CAB05418 Rv2958c                           | AIANAYWSPQARRRF 50<br>RRFPLPDVPWTRFFG 54                          | PLIFALYCLPLNWLR 063                                                |
| POSSIBLE GLYCOSYL TRANSFERASE CAB05419 Rv2957                            | AFDLDRLLFKRNICH 52                                                |                                                                    |
| M. BOVIS MYCOCEROSIC ACID SYNTHASE GENE M95808                           | GYIPILGAPWLADLV 660<br>PILGAPWLADLVRRS 661<br>FRMELLSLPQDEWAG 672 | TVFKLTADGVLTAPO 056<br>SSGAALLGSPGQGAY 063<br>VHPLLGSHVRLTEEP 029  |
| RNA POLYMERASE BETA-SUBUNIT AAA21416 L27989                              | KAMLFDRSGEPFPY 336                                                |                                                                    |
| POSSIBLE HEMOLYSIN CAA16235, Rv3922c                                     | IRLAKCGPWHRGGWD 24<br>LRPASCRFVPTCSQY 13                          | AVDALTEYGLLRGSW 018                                                |
| PPE FAMILY PROTEIN YP_177963 (Rv3347c)                                   | ALMSGNFNSGILWRG 333<br>PFNVNLKQLFLHDAF 373                        | AAAAAMAAAAAPYAGW 021<br>FRLPLLNVNALGDNW 578<br>NIGNANVGFGNIGHG 674 |
| PPE FAMILY ROTEIN CAE55489 (Rv2430c)                                     | WRSLDVEMTAVQRSV 011                                               | NRTLLESLMDAWAGPV 016<br>AMTRAASPYVGLWNT 022                        |
| TRANSMEMBRANE SERINE/THREONINE-PROTEIN KINASE D PKND NP_215446 Rv0931c   | YRADSVERLIAAHLM 072                                               | APWGIAVDEAGTVVYV 199                                               |
| PROBABLE ISOCITRATE DEHYDROGENASE CAA16247 Rv0066c                       | GELDNRRGSQFYLAMY 219                                              | RMCIKVDAPIRDWVK 154                                                |
| PUTATIVE CYCLOPROPANE-FATTY-ACYL-PHOSPHOLIPID-SYNTHASE NP_854118 Mb0455c | HWLRPITPTFRPSWP 042<br>EMIEAVGYRSWPRYF 094                        | LGDFEVFARMWELYL 130                                                |
| CONSERVED HYPOTHETICAL PROTEIN CAB06237 Rv3864                           | GVYKVCKGLEKIPLL 038                                               |                                                                    |
| MTB48 AAK31576 AY029285                                                  | QAQYVAQLHVWARRE 070                                               |                                                                    |
| SECRETED L-ALANINE DEHYDROGENASE ALD CAA15575 Rv2780                     | FCGRIHTRYSSAYEL 071                                               |                                                                    |
| IMMUNOGENIC PROTEIN MPT64 CAA98382 Rv1980c                               |                                                                   | GGTHPTTTYKAFDWD 090<br>TTYKAFDWDQAYRKP 092                         |
| SECRETED ESAT6-LIKE PROTEIN ESXR CAA16104 (Rv3019c) = TB10.3             |                                                                   | IMYNYPAMMAHAGDM 002                                                |
| LOW MOLECULAR WEIGHT PROTEIN ANTIGEN 7 ESXH CAA17363 Rv0288              |                                                                   | IMYNYPAMLGHAGDM 002                                                |
| PROBABLE CUTINASE PRECURSOR CFP21 NP_216500                              |                                                                   | GFSSMLWGGGSLPTI 051                                                |

|                                                                             |  |                     |
|-----------------------------------------------------------------------------|--|---------------------|
| Rv1984c                                                                     |  |                     |
| CONSERVED HYPOTHETICAL<br>PROTEIN CAB08634 Rv2629                           |  | AIAVGAALVRDDNRI 113 |
| 6 KDA EARLY SECRETORY<br>ANTIGENIC TARGET ESXA (ESAT-<br>6) CAE55648 Rv3875 |  | AAASAIQGNVTSIHS 005 |

Listing of the peptides was defined by the index. Note that IgG target epitope recognition segregates not into distinct proteins, yet the recognition pattern segregates into specific, different locations on proteins.
