# Supplementary material for: Pattern Recognition in Pulmonary Tuberculosis Defined by High Content Peptide Microarray Chip Analysis Representing 61 Proteins from M. tuberculosis
Source: PubMed Central journal article supplement (PMC2588537; doi:10.1371/journal.pone.0003840), 2008-12-09
Supplement: pone.0003840.s007.pdf [file pone.0003840.s007.pdf]

Supplementary Table 7: Blast search of the top 12 peptide exclusively recognized in healthy, PPD-, Quantiferon-negative individuals.

**YNGWDINTPAFEWYY-030 (CAB10044, Rv1886c)**

|                          |                  |
|--------------------------|------------------|
| YNGWDINTPAFEWYY          | M.tuberculosis   |
| YNGWDINTPAFEWYY          | M.marinum        |
| YNGWDINTPAFEWYY          | M.ulcerans       |
| YNGWDINTPAFEWYY          | M.bovis          |
| YNGWDINTPAFEWYY          | M.avium          |
| YNGWDINTPAFEWYY          | M.intracellulare |
| YNGWDINTPAFEW <b>F</b> Y | M.smegmatis      |
| YNGWDINTPAFEW <b>F</b> Y | M.vanbaalenii    |

**SPACGKAGCQTYKWE-042 (CAB10044, Rv1886c)**

|                          |                 |
|--------------------------|-----------------|
| SPACGKAGCQTYKWE          | M. tuberculosis |
| SPACGKAGCQTYKWE          | M. bovis        |
| SPACGKAGCQTYKWE          | M. leprae       |
| SPACGKAGC <b>S</b> TYKWE | M. gilvum       |
| -PACGKAGC <b>T</b> TYKWE | M. marinum      |
| -PACGKAGC <b>T</b> TYKWE | M. avium        |
| -PACGKAGC <b>S</b> TYKWE | M. vanbaalenii  |
| -PACGKAGC <b>S</b> TYKWE | M. flavescens   |

**PLIFALYCLPLNWLR-063 (CAB05418, Rv2958c)**

|                        |                                                     |
|------------------------|-----------------------------------------------------|
| PLIFALYCLPLNWLR        | M. tuberculosis                                     |
| PLIFALYCLPLNWLR        | M. bovis                                            |
| PLIFALYCLPLNW <b>R</b> | M.leprae                                            |
| LYCLPL <b>HWM</b> *    | Infectious hypodermal & hematopoieticnecrosis virus |

**TVFKLTADGVLTAPQ-056 (M95808)**

|                                           |                        |
|-------------------------------------------|------------------------|
| TVFKLTADGVLTAPQ                           | M. tuberculosis        |
| TVFKLTADGVLTAPQ                           | M. bovis               |
| TVF <b>N</b> L <b>T</b> ADGVLTAP <b>E</b> | M. leprae              |
| KLTADGV <b>S</b> L <b>TAKQ</b> *          | Caenorhabditis elegans |
| TVFKL <b>S</b> LDGVL*                     | Parabacteroides merdae |
| KLT <b>S</b> LDGVL*                       | Plasmodium vivax       |
| ADGVLTAP*                                 | Methylobacterium sp.   |

**SSGAALLGSPGQAY-063 (M95808)**

|                                  |                      |
|----------------------------------|----------------------|
| SSGAALLGSPGQAY                   | M. tuberculosis      |
| SSGAALLGSPGQAY                   | M. leprae            |
| SSGAALLGSPGQAY                   | M. bovis             |
| SSGAAL <b>M</b> GSPGQAY          | M. marinum           |
| SSGAAL <b>M</b> GSPGQAY          | M. ulcerans          |
| SS <b>S</b> SALLGSPGQAY          | Streptomyces fradiae |
| SS <b>A</b> AGLLGSPGQAY          | Streptomyces sp      |
| SS <b>A</b> AAL <b>V</b> GSPGQAY | M.smegmatis          |
| SS <b>A</b> AAL <b>V</b> GSPGQAY | M. avium             |

**VHPLLGSVRLTEEP-029 (M95808)**

|                  |                            |
|------------------|----------------------------|
| VHPLLGS HVRLTEEP | M. tuberculosis            |
| VHPLLGS HVRLTEEP | M. bovis                   |
| VHPLLGS HVRLPEEP | M. avium                   |
| VHPLLGAHVRLAEEP  | M. abscessus               |
| VHPLLGS HVRLLEEP | M. leprae                  |
| VHPLLGS HVVLPQEP | M. smegmatis               |
| HPLLGS VVRLAE*   | Streptomyces hygroscopicus |

**AVDALTEYGLLRGSW -018 (CAA16235, Rv3922c)**

|                 |                                       |
|-----------------|---------------------------------------|
| AVDALTEYGLLRGSW | M. tuberculosis                       |
| AVDALTEYGLIRGTW | M. smegmatis                          |
| AVDALSEYGLIRGSW | M. ulcerans                           |
| AVDALDEYGLIRGSW | M. avium                              |
| YGLLRGSW*       | Novosphingobium aromaticivorans       |
| YGLLRGSW*       | Rhodopseudomonas palustris            |
| VDGLTESGLLRG*   | Saccharopolyspora erythraea NRRL 2338 |

**AAAAMAAAAAPYAGW-021 (YP\_177963, Rv3347c)**

|                 |                 |
|-----------------|-----------------|
| AAAAMAAAAAPYAGW | M. tuberculosis |
| AAAAMAAAAAPYAGW | M. marinum      |
| AAAAMAAAAAPYAGW | M. bovis        |
| AAAAMAAAAAPYAGW | M. ulcerans     |

**FRLPLLFVNALGDNW-578 (YP\_177963, Rv3347c)**

|                 |                        |
|-----------------|------------------------|
| FRLPLLFVNALGDNW | M. tuberculosis        |
| FRLPLLFVNALGDNW | M. bovis               |
| FR-PLLFVNAL*    | Marinobacter algicola  |
| FKLPLLFVIAL*    | Lactococcus lactis     |
| FRVPLLFVAAL*    | Aspergillus clavatus   |
| FR-PLLFINAL*    | Marinobacter aquaeolei |

**NIGNANVGFGNIGHG-674 (YP\_177963, Rv3347c)**

|                 |                 |
|-----------------|-----------------|
| NIGNANVGFGNIGHG | M. tuberculosis |
| NIGNANVGFGNIGHG | M. bovis        |

**NRTLLSLMDAWAGPV-016 (CAE55489, Rv2430c)**

|                 |                         |
|-----------------|-------------------------|
| NRTLLSLMDAWAGPV | M. tuberculosis         |
| NRTLLSLMDAWAGPV | M. bovis                |
| TLLDLMDAWA*     | Akkermansia muciniphila |

**AMTRAASPYVGLWNT-022 (CAE55489, Rv2430c)**

|                 |                 |
|-----------------|-----------------|
| AMTRAASPYVGLWNT | M. tuberculosis |
| AMTRAASPYVGLWNT | M. bovis        |
