# Supplementary material for: Pattern Recognition in Pulmonary Tuberculosis Defined by High Content Peptide Microarray Chip Analysis Representing 61 Proteins from M. tuberculosis
Source: PLoS One. 2008 Dec 9;3(12):e3840. doi: 10.1371/journal.pone.0003840 (PMC2588537; doi:10.1371/journal.pone.0003840)
Supplement: Table S5 — Comparison of MTB peptides defined by IgG in patients from Armenia and from Sweden. (0.19 MB PDF) [file pone.0003840.s005.pdf]

**Supplementary Table 5. Comparison of MTB peptides defined by IgG in patients from Armenia and from Sweden.**

| Peptides         | Protein                                                        | Index value in 34 TB+ patients from Armenia | Peptides         | Protein                                                    | Index value in 6 TB+ patients from Sweden |
|------------------|----------------------------------------------------------------|---------------------------------------------|------------------|------------------------------------------------------------|-------------------------------------------|
| QSSFYSDWYSPACGK  | CAB10044.1; SECRETED ANTIGEN 85-B FBPB (85B)                   | 1,7776                                      | MGCRLPGGINSPODKL | MYCOBACTERIUM BOVIS MYCOCEROSIC ACID SYNTHASE GENE; M95808 | 3,2663                                    |
| MTAHTHDGTRTWRTG  | CAB10947.1; PROBABLE LIPOPROTEIN LPRJ                          | 1,4567                                      | WLADLVRRSPWGEMF  | MYCOBACTERIUM BOVIS MYCOCEROSIC ACID SYNTHASE GENE; M95808 | 2,0054                                    |
| VRRRHGLSSLGWNL   | POSSIBLE GLYCOSYL TRANSFERASE CAB05415                         | 1,3994                                      | TGRSLDMSVAALAGM  | MYCOBACTERIUM BOVIS MYCOCEROSIC ACID SYNTHASE GENE; M95808 | 1,9423                                    |
| PILGAPWLADLVRRS  | MYCOBACTERIUM BOVIS MYCOCEROSIC ACID SYNTHASE GENE; M95808     | 1,3324                                      | PILGAPWLADLVRRS  | MYCOBACTERIUM BOVIS MYCOCEROSIC ACID SYNTHASE GENE; M95808 | 1,8986                                    |
| KAMLFDRSGEPFPY   | RNA POLYMERASE BETA-SUBUNIT AAA21416                           | 1,2314                                      | KAMLFDRSGEPFPY   | RNA POLYMERASE BETA-SUBUNIT AAA21416                       | 1,8126                                    |
| IRLAKCGPWHRGGWD  | POSSIBLE HEMOLYSIN CAA16235                                    | 1,141                                       | VKAPGFGDRRKAMLQ  | 60 kDa chaperonin 2 P0A521                                 | 1,7968                                    |
| ALMSGNFSNGILWRG  | YP_177963; PPE FAMILY PROTEIN                                  | 1,0973                                      | PTIMGEVRRHFRDNS  | ALTERNATE RNA POLYMERASE SIGMA FACTOR SIGF CAB07069        | 1,7872                                    |
| YRADSVRLIAAHL    | TRANSMEMBRANE SERINE/THREONINE-PROTEIN KINASE D PKND NP_215446 | 1,0307                                      | GMYNFKESIRDFARA  | CAA17111.1; PROBABLE ISOCITRATE DEHYDROGENASE              | 1,7756                                    |
| GYIPILGAPWLADLV  | MYCOBACTERIUM BOVIS MYCOCEROSIC ACID SYNTHASE GENE; M95808     | 0,956                                       | GELDNRRGSQFYLYMY | PROBABLE ISOCITRATE DEHYDROGENASE CAA16247                 | 1,7505                                    |
| FRMELLSLPQDEWAG  | MYCOBACTERIUM BOVIS MYCOCEROSIC ACID SYNTHASE GENE; M95808     | 0,9553                                      | LTAANTKKVAMAAPM  | POSSIBLE GLYCOSYL TRANSFERASE CAB05419                     | 1,7085                                    |
| AFDLDRLLFKRNICH  | POSSIBLE GLYCOSYL TRANSFERASE CAB05419                         | 0,9176                                      | AFDLDRLLFKRNICH  | POSSIBLE GLYCOSYL TRANSFERASE CAB05419                     | 1,6717                                    |
| GELDNRRGSQFYLYMY | PROBABLE ISOCITRATE DEHYDROGENASE CAA16247                     | 0,8795                                      | MTAHTHDGTRTWRTG  | CAB10947.1; PROBABLE LIPOPROTEIN LPRJ                      | 1,6451                                    |
| YRLERPLLALQCMF   | POSSIBLE GLYCOSYL TRANSFERASE CAB05415                         | 0,8753                                      | QSSFYSDWYSPACGK  | CAB10044.1; SECRETED ANTIGEN 85-B FBPB (85B)               | 1,6311                                    |
| HWLRPITPTFRPSWP  | PUTATIVE CYCLOPROPANE-FATTY-ACYL-                              | 0,783                                       | VIPTMTPPPGMVRQR  | CAA17582.1; PROBABLE SERINE PROTEASE PEPD                  | 1,5876                                    |

|                 |                                                                                         |        |  |                  |                                                                                         |        |
|-----------------|-----------------------------------------------------------------------------------------|--------|--|------------------|-----------------------------------------------------------------------------------------|--------|
|                 | PHOSPHOLIPID<br>SYNTHASE UFAA1<br>NP_854118                                             |        |  |                  |                                                                                         |        |
| PFNVNLKLQFLHDAF | YP_177963; PPE<br>FAMILY PROTEIN                                                        | 0,7652 |  | LKMCWPAAPRSVGVP  | POSSIBLE<br>HEMOLYSIN-LIKE<br>PROTEIN CAA17201                                          | 1,5409 |
| AIANAYWSPQARRRF | POSSIBLE<br>GLYCOSYL<br>TRANSFERASE<br>CAB05418                                         | 0,7299 |  | RSLHWLRPITPTFRP  | PUTATIVE<br>CYCLOPROPANE-<br>FATTY-ACYL-<br>PHOSPHOLIPID<br>SYNTHASE UFAA1<br>NP_854118 | 1,5054 |
| WRSLDVEMTAVQRSF | PPE FAMILY<br>PROTEIN CAE55489                                                          | 0,7127 |  | ALMSGNFSNGILWRG  | YP_177963; PPE<br>FAMILY PROTEIN                                                        | 1,4496 |
| RRFPLDPVPWTRFFG | POSSIBLE<br>GLYCOSYL<br>TRANSFERASE<br>CAB05418                                         | 0,6965 |  | YRADSVRLIAAHL    | TRANSMEMBRANE<br>SERINE/THREONINE-<br>PROTEIN KINASE D<br>PKND NP_215446                | 1,432  |
| GVYKVCKGLEKIPLL | CAB06237.1;<br>CONSERVED<br>HYPOTHETICAL<br>PROTEIN                                     | 0,6757 |  | FCGRIHTRYSSAYEL  | SECRETED L-<br>ALANINE<br>DEHYDROGENASE<br>ALD CAA15575                                 | 1,4222 |
| EMIEAVGYRSWPRYF | PUTATIVE<br>CYCLOPROPANE-<br>FATTY-ACYL-<br>PHOSPHOLIPID<br>SYNTHASE UFAA1<br>NP_854118 | 0,6748 |  | GLRGLLRVISSEHPM  | MYCOBACTERIUM<br>BOVIS<br>MYCOCEROSIC ACID<br>SYNTHASE GENE;<br>M95808                  | 1,3622 |
| QAQYVAQLHVWARRE | MTB48 AAK31576                                                                          | 0,6624 |  | HWLRPITPTFRPSWP  | PUTATIVE<br>CYCLOPROPANE-<br>FATTY-ACYL-<br>PHOSPHOLIPID<br>SYNTHASE UFAA1<br>NP_854118 | 1,3283 |
| FCGRIHTRYSSAYEL | SECRETED L-<br>ALANINE<br>DEHYDROGENASE<br>ALD CAA15575                                 | 0,6143 |  | GYIPILGAPWLADLV  | MYCOBACTERIUM<br>BOVIS<br>MYCOCEROSIC ACID<br>SYNTHASE GENE;<br>M95808                  | 1,27   |
| LRPASCRFVPTCSQY | POSSIBLE<br>HEMOLYSIN<br>CAA16235                                                       | 0,6097 |  | WGGAFDLDRLLFKRN  | POSSIBLE<br>GLYCOSYL<br>TRANSFERASE<br>CAB05419                                         | 1,2687 |
| RHGLSSLGWNLCRIF | POSSIBLE<br>GLYCOSYL<br>TRANSFERASE<br>CAB05415                                         | 0,5962 |  | AMRTLRYKYVEADLRV | POSSIBLE<br>GLYCOSYL<br>TRANSFERASE<br>CAB05415                                         | 1,2657 |
| WGGAFDLDRLLFKRN | POSSIBLE<br>GLYCOSYL<br>TRANSFERASE<br>CAB05419                                         | 0,5502 |  | LSPLRPASCRFVPTC  | POSSIBLE<br>HEMOLYSIN<br>CAA16235                                                       | 1,2146 |
| RLVKLLYRLERPLLF | POSSIBLE<br>GLYCOSYL<br>TRANSFERASE<br>CAB05415                                         | 0,5502 |  | LRPASCRFVPTCSQY  | POSSIBLE<br>HEMOLYSIN<br>CAA16235                                                       | 1,2138 |
| ARASFSYGLNAKWPV | CAA17111.1;<br>PROBABLE<br>ISOCITRATE<br>DEHYDROGENASE                                  | 0,5338 |  | YCGKYKRVRFKGIIC  | RNA POLYMERASE<br>BETA'-SUBUNIT<br>AAA21417                                             | 1,1718 |
| DVPWTRFFGVRPVS  | POSSIBLE<br>GLYCOSYL<br>TRANSFERASE<br>CAB05418                                         | 0,5333 |  | PKVISRAMVMRTVIS  | POSSIBLE<br>GLYCOSYL<br>TRANSFERASE<br>CAB05419                                         | 1,1702 |
| WLADLVRRSPWGEMF | MYCOBACTERIUM<br>BOVIS<br>MYCOCEROSIC ACID<br>SYNTHASE GENE;<br>M95808                  | 0,5301 |  | PEFQRHRDKIVQRCL  | ALTERNATE RNA<br>POLYMERASE<br>SIGMA FACTOR SIGF<br>CAB07069                            | 1,1516 |
| PWDGRNHLYAAVYRT | CAA16030.1;                                                                             | 0,5262 |  | LRLMPENRPTWLAS   | POSSIBLE                                                                                | 1,125  |

|                 |                                                                                                 |        |  |                 |                                                                                                 |        |
|-----------------|-------------------------------------------------------------------------------------------------|--------|--|-----------------|-------------------------------------------------------------------------------------------------|--------|
|                 | PROBABLE<br>MOLYBDOPTERIN-<br>GUANINE<br>DINUCLEOTIDE<br>BIOSYNTHESIS<br>PROTEIN                |        |  |                 | GLYCOSYL<br>TRANSFERASE<br>CAB05415                                                             |        |
| LVVKRGPNAGSRFLL | CAB01474.1;<br>CONSERVED<br>HYPOTHETICAL<br>PROTEIN CFP17                                       | 0,5166 |  | PVTHIWYFKGVPSRL | RNA POLYMERASE<br>BETA'-SUBUNIT<br>AAA21417                                                     | 1,0922 |
| GVRLAFVCAVDMPYL | CAA16030.1;<br>PROBABLE<br>MOLYBDOPTERIN-<br>GUANINE<br>DINUCLEOTIDE<br>BIOSYNTHESIS<br>PROTEIN | 0,5089 |  | IRLAKCGPWHRGGWD | POSSIBLE<br>HEMOLYSIN<br>CAA16235                                                               | 1,0881 |
| LSPLRPASCRFVPTC | POSSIBLE<br>HEMOLYSIN<br>CAA16235                                                               | 0,4868 |  | AVAVGCAQPACLRAY | MYCOBACTERIUM<br>BOVIS<br>MYCOCEROSIC ACID<br>SYNTHASE GENE;<br>M95808                          | 1,0307 |
| PVTHIWYFKGVPSRL | RNA POLYMERASE<br>BETA'-SUBUNIT<br>AAA21417                                                     | 0,4781 |  | YRLERPLLALQCMP  | POSSIBLE<br>GLYCOSYL<br>TRANSFERASE<br>CAB05415                                                 | 1,0282 |
| VKGAWVLARYDDGRP | CONSERVED<br>HYPOTHETICAL<br>PROTEIN<br>TB18.5CAD93033                                          | 0,4771 |  | DVPWTRFFGVRPVS  | POSSIBLE<br>GLYCOSYL<br>TRANSFERASE<br>CAB05418                                                 | 1,0253 |
| AITNTARPHWIGLYG | PPE FAMILY<br>PROTEIN CAE55334                                                                  | 0,4769 |  | NMREYLAAGAKERQR | MTB48 AAK31576                                                                                  | 1,001  |
| FRHHAIHTIPSERFF | POSSIBLE<br>GLYCOSYL<br>TRANSFERASE<br>CAB05415                                                 | 0,465  |  | GVRLAFVCAVDMPYL | CAA16030.1;<br>PROBABLE<br>MOLYBDOPTERIN-<br>GUANINE<br>DINUCLEOTIDE<br>BIOSYNTHESIS<br>PROTEIN | 0,9976 |
| FNIRCFSPALVTRY  | POSSIBLE<br>GLYCOSYL<br>TRANSFERASE<br>CAB05419                                                 | 0,4586 |  | VRRRHGLSSLGWNLC | POSSIBLE<br>GLYCOSYL<br>TRANSFERASE<br>CAB05415                                                 | 0,9946 |
| PSERFFGNLTQGRFY | POSSIBLE<br>GLYCOSYL<br>TRANSFERASE<br>CAB05415                                                 | 0,4571 |  | PVAVIGMGCRLPGGI | MYCOBACTERIUM<br>BOVIS<br>MYCOCEROSIC ACID<br>SYNTHASE GENE;<br>M95808                          | 0,9943 |
| PTIMGEVRRHFRDNS | ALTERNATE RNA<br>POLYMERASE<br>SIGMA FACTOR SIGF<br>CAB07069                                    | 0,4569 |  | WRSLDVEMTAVQRSF | PPE FAMILY<br>PROTEIN CAE55489                                                                  | 0,9935 |
| FTLPGRSLMFVRNVG | MTB81 (publication)                                                                             | 0,4539 |  | AIANAYWSPQARRRF | POSSIBLE<br>GLYCOSYL<br>TRANSFERASE<br>CAB05418                                                 | 0,9873 |
| SQFGPYQLLRLLGRG | TRANSMEMBRANE<br>SERINE/THREONINE-<br>PROTEIN KINASE D<br>PKND NP_215446                        | 0,451  |  | FRMELLSLPQDEWAG | MYCOBACTERIUM<br>BOVIS<br>MYCOCEROSIC ACID<br>SYNTHASE GENE;<br>M95808                          | 0,9579 |
| PDFKWPPTPGSPLFP | CAB06237.1;<br>CONSERVED<br>HYPOTHETICAL<br>PROTEIN                                             | 0,4411 |  | RMRKFARSNHGTCAN | RNA POLYMERASE<br>BETA-SUBUNIT<br>AAA21416                                                      | 0,9493 |
| RTLRYIAADRKILN  | POSSIBLE<br>GLYCOSYL<br>TRANSFERASE<br>CAB05418                                                 | 0,4273 |  | GVYKVCKGLEKIPLL | CAB06237.1;<br>CONSERVED<br>HYPOTHETICAL<br>PROTEIN                                             | 0,9396 |

|                 |                                                                                         |        |  |                 |                                                                                         |        |
|-----------------|-----------------------------------------------------------------------------------------|--------|--|-----------------|-----------------------------------------------------------------------------------------|--------|
| IQMSDPAYNINISLP | CAA98382.1;<br>IMMUNOGENIC<br>PROTEIN MPT64                                             | 0,4247 |  | QAQYVAQLHVWARRE | MTB48 AAK31576                                                                          | 0,8876 |
| NYRYAINNSFGFGGH | 3-OXOACYL-[ACYL-<br>CARRIER PROTEIN]<br>SYNTHASE 2 KASB<br>CAA94642                     | 0,4105 |  | FACDPRFNKLLGLPL | POSSIBLE<br>GLYCOSYL<br>TRANSFERASE<br>CAB05418                                         | 0,8726 |
| SFYRPKRPGSYPIVL | PERIPLASMIC<br>PHOSPHATE-<br>BINDING<br>LIPOPROTEIN PSTS3<br>YP_177768                  | 0,407  |  | LVVKRGNAGSRFLL  | CAB01474.1;<br>CONSERVED<br>HYPOTHETICAL<br>PROTEIN CFP17                               | 0,869  |
| AATIKRFADRFARFN | MYCOBACTERIUM<br>BOVIS ACYL-COA<br>SYNTHASE GENE;<br>U75685                             | 0,4066 |  | HPIVFGHAVRIFYKD | PROBABLE<br>ISOCITRATE<br>DEHYDROGENASE<br>CAA16247                                     | 0,8627 |
| LRISQLLANWLRHG  | MTB81 (publication)                                                                     | 0,4058 |  | KIHARSTGPYMITQ  | RNA POLYMERASE<br>BETA-SUBUNIT<br>AAA21416                                              | 0,855  |
| YNQLLGPLPFRHHAI | POSSIBLE<br>GLYCOSYL<br>TRANSFERASE<br>CAB05415                                         | 0,4034 |  | SRTGSIYIVKPKMHG | MTB81 (publication)                                                                     | 0,8511 |
| FTLPGERIHVVFRSD | PERIPLASMIC<br>PHOSPHATE-<br>BINDING<br>LIPOPROTEIN PSTS3<br>YP_177768                  | 0,392  |  | RRFPLDPVPWTRFFG | POSSIBLE<br>GLYCOSYL<br>TRANSFERASE<br>CAB05418                                         | 0,8376 |
| HPIVFGHAVRIFYKD | PROBABLE<br>ISOCITRATE<br>DEHYDROGENASE<br>CAA16247                                     | 0,3856 |  | PDFKWPPTPGSPLFP | CAB06237.1;<br>CONSERVED<br>HYPOTHETICAL<br>PROTEIN                                     | 0,8202 |
| RSLHWLRPITPTFRP | PUTATIVE<br>CYCLOPROPANE-<br>FATTY-ACYL-<br>PHOSPHOLIPID<br>SYNTHASE UFAA1<br>NP_854118 | 0,3799 |  | RQRVAAAGFGHRVEI | PUTATIVE<br>CYCLOPROPANE-<br>FATTY-ACYL-<br>PHOSPHOLIPID<br>SYNTHASE UFAA1<br>NP_854118 | 0,7801 |
| MLATRHTQTWIQYI  | PUTATIVE<br>CYCLOPROPANE-<br>FATTY-ACYL-<br>PHOSPHOLIPID<br>SYNTHASE UFAA1<br>NP_854118 | 0,3777 |  | ARASFSYGLNAKWPV | CAA17111.1;<br>PROBABLE<br>ISOCITRATE<br>DEHYDROGENASE                                  | 0,7763 |
| SCVYATASRWGGPPV | POSSIBLE<br>GLYCOSYL<br>TRANSFERASE<br>CAB05415                                         | 0,3697 |  | RCLPLADHIARRFEG | ALTERNATE RNA<br>POLYMERASE<br>SIGMA FACTOR SIGF<br>CAB07069                            | 0,7725 |
| VRPVSILYRLYRPLI | POSSIBLE<br>GLYCOSYL<br>TRANSFERASE<br>CAB05418                                         | 0,3589 |  | AVLDPDHDGMRVQVR | MYCOBACTERIUM<br>BOVIS<br>MYCOCEROSIC ACID<br>SYNTHASE GENE;<br>M95808                  | 0,7721 |
| FYRRGLFGTIGPYNL | POSSIBLE<br>GLYCOSYL<br>TRANSFERASE<br>CAB05419                                         | 0,3525 |  | MLATRHTQTWIQYI  | PUTATIVE<br>CYCLOPROPANE-<br>FATTY-ACYL-<br>PHOSPHOLIPID<br>SYNTHASE UFAA1<br>NP_854118 | 0,7599 |
| TRYSSAYELEGAVKR | SECRETED L-<br>ALANINE<br>DEHYDROGENASE<br>ALD CAA15575                                 | 0,3507 |  | SCVYATASRWGGPPV | POSSIBLE<br>GLYCOSYL<br>TRANSFERASE<br>CAB05415                                         | 0,7582 |
| AVAVGCAQPACLRAY | MYCOBACTERIUM<br>BOVIS<br>MYCOCEROSIC ACID<br>SYNTHASE GENE;<br>M95808                  | 0,3436 |  | FTLPGRSLMFVRNVG | MTB81 (publication)                                                                     | 0,747  |
| RYARCLGSAVNPVLR | PROBABLE                                                                                | 0,3428 |  | EMIEAVGYRSWPRYF | PUTATIVE                                                                                | 0,7395 |

|                  |                                                                                         |        |  |                  |                                                                                                 |        |
|------------------|-----------------------------------------------------------------------------------------|--------|--|------------------|-------------------------------------------------------------------------------------------------|--------|
|                  | ISOCITRATE<br>DEHYDROGENASE<br>CAA16247                                                 |        |  |                  | CYCLOPROPANE-<br>FATTY-ACYL-<br>PHOSPHOLIPID<br>SYNTHASE UFAA1<br>NP_854118                     |        |
| QAIFYRRGLFGTIGP  | POSSIBLE<br>GLYCOSYL<br>TRANSFERASE<br>CAB05419                                         | 0,3288 |  | PWDGRNHLYAAVYRT  | CAA16030.1;<br>PROBABLE<br>MOLYBDOPTERIN-<br>GUANINE<br>DINUCLEOTIDE<br>BIOSYNTHESIS<br>PROTEIN | 0,7307 |
| EAVGYRSWPRYFAAL  | PUTATIVE<br>CYCLOPROPANE-<br>FATTY-ACYL-<br>PHOSPHOLIPID<br>SYNTHASE UFAA1<br>NP_854118 | 0,3231 |  | MIDGTSLRALLKQYG  | TRANSMEMBRANE<br>SERINE/THREONINE-<br>PROTEIN KINASE D<br>PKND NP_215446                        | 0,7116 |
| RSEYRQAAARLADAF  | POSSIBLE<br>GLYCOSYL<br>TRANSFERASE<br>CAB05415                                         | 0,3201 |  | SPAMVAANRTRLASL  | PPE FAMILY<br>PROTEIN CAE55504                                                                  | 0,7048 |
| RKYIAADRKILNEIA  | POSSIBLE<br>GLYCOSYL<br>TRANSFERASE<br>CAB05418                                         | 0,3156 |  | EQAGLRGLLRVISSE  | MYCOBACTERIUM<br>BOVIS<br>MYCOCEROSIC ACID<br>SYNTHASE GENE;<br>M95808                          | 0,6865 |
| LFIHRPDALARRIGR  | PUTATIVE<br>CYCLOPROPANE-<br>FATTY-ACYL-<br>PHOSPHOLIPID<br>SYNTHASE UFAA1<br>NP_854118 | 0,3114 |  | KYKRVRFKGIICERC  | RNA POLYMERASE<br>BETA'-SUBUNIT<br>AAA21417                                                     | 0,6861 |
| NGDEVQIGKFRLVFL  | CAB01474.1;<br>CONSERVED<br>HYPOTHETICAL<br>PROTEIN CFP17                               | 0,2974 |  | MSVAALAGMRREQPL  | MYCOBACTERIUM<br>BOVIS<br>MYCOCEROSIC ACID<br>SYNTHASE GENE;<br>M95808                          | 0,6787 |
| FGVRLVKLLYRLERP  | POSSIBLE<br>GLYCOSYL<br>TRANSFERASE<br>CAB05415                                         | 0,2921 |  | RTLRYIAADRKILN   | POSSIBLE<br>GLYCOSYL<br>TRANSFERASE<br>CAB05418                                                 | 0,6733 |
| RVNPFPGFIETPYRKV | RNA POLYMERASE<br>BETA-SUBUNIT<br>AAA21416                                              | 0,2893 |  | RVNPFPGFIETPYRKV | RNA POLYMERASE<br>BETA-SUBUNIT<br>AAA21416                                                      | 0,6619 |
| GMYNFKESIRDFARA  | CAA17111.1;<br>PROBABLE<br>ISOCITRATE<br>DEHYDROGENASE                                  | 0,2874 |  | GDFYAGEKSMTLDRA  | PROBABLE<br>ISOCITRATE<br>DEHYDROGENASE<br>CAA16247                                             | 0,6608 |
| FRSGYLDVYQWTLIR  | PUTATIVE<br>CYCLOPROPANE-<br>FATTY-ACYL-<br>PHOSPHOLIPID<br>SYNTHASE UFAA1<br>NP_854118 | 0,2852 |  | RGPGQMLGGLPVGQM  | CAE55371.1; PPE<br>FAMILY PROTEIN                                                               | 0,6593 |
| YRATNFKVDQPGTVT  | CAA17111.1;<br>PROBABLE<br>ISOCITRATE<br>DEHYDROGENASE                                  | 0,2784 |  | DLVRRSPWGEMFAST  | MYCOBACTERIUM<br>BOVIS<br>MYCOCEROSIC ACID<br>SYNTHASE GENE;<br>M95808                          | 0,6586 |
| FGTIGPYNLRYRVLA  | POSSIBLE<br>GLYCOSYL<br>TRANSFERASE<br>CAB05419                                         | 0,2738 |  | RVGFQPHVENALRLM  | POSSIBLE<br>GLYCOSYL<br>TRANSFERASE<br>CAB05415                                                 | 0,6453 |
| TGDEVTYRADIYALA  | TRANSMEMBRANE<br>SERINE/THREONINE-<br>PROTEIN KINASE D<br>PKND NP_215446                | 0,2714 |  | KIRAWGRRLMIGTAA  | CAB10044.1;<br>SECRETED ANTIGEN<br>85-B FBPB (85B)                                              | 0,6345 |
| PLNWLRRKHGLSSLG  | POSSIBLE                                                                                | 0,2405 |  | AITNTARPWHIGLYG  | PPE FAMILY                                                                                      | 0,6268 |

|                 |                                                                                         |        |  |                  |                                                                                         |        |
|-----------------|-----------------------------------------------------------------------------------------|--------|--|------------------|-----------------------------------------------------------------------------------------|--------|
|                 | GLYCOSYL<br>TRANSFERASE<br>CAB05418                                                     |        |  |                  | PROTEIN CAE55334                                                                        |        |
| WSVKVPRRLKELHLR | ALTERNATE RNA<br>POLYMERASE<br>SIGMA FACTOR SIGF<br>CAB07069                            | 0,2347 |  | PPSLVAANRSRLMSL  | PPE FAMILY<br>PROTEIN CAE55334                                                          | 0,6126 |
| KAVKEYARKHPHSMG | PROBABLE<br>ISOCITRATE<br>DEHYDROGENASE<br>CAA16247                                     | 0,2334 |  | DPTQQIPKLVANNTR  | CAB10044.1;<br>SECRETED ANTIGEN<br>85-B FBPB (85B)                                      | 0,5906 |
| AAIANRLLRRTATHL | PUTATIVE<br>CYCLOPROPANE-<br>FATTY-ACYL-<br>PHOSPHOLIPID<br>SYNTHASE UFAA1<br>NP_854118 | 0,2259 |  | QRVAVRVSQLHAGPR  | CONSERVED<br>HYPOTHETICAL<br>PROTEIN CAB08634                                           | 0,585  |
| WPVYLSTKNTILKAY | CAA17111.1;<br>PROBABLE<br>ISOCITRATE<br>DEHYDROGENASE                                  | 0,2243 |  | TRYSSAYELEGAVKR  | SECRETED L-<br>ALANINE<br>DEHYDROGENASE<br>ALD CAA15575                                 | 0,5797 |
| EVQIGKFRLVFLTGP | CAB01474.1;<br>CONSERVED<br>HYPOTHETICAL<br>PROTEIN CFP17                               | 0,2181 |  | WSVKVPRRLKELHLR  | ALTERNATE RNA<br>POLYMERASE<br>SIGMA FACTOR SIGF<br>CAB07069                            | 0,5761 |
| YGSFRRSFRLPAHVT | CAA17343.1; HEAT<br>SHOCK PROTEIN<br>HSP                                                | 0,2164 |  | AATIKRFADRFARFN  | MYCOBACTERIUM<br>BOVIS ACYL-COA<br>SYNTHASE GENE;<br>U75685                             | 0,5613 |
| IEYRSLARVYGAGTP | MYCOBACTERIUM<br>BOVIS<br>MYCOCEROSIC ACID<br>SYNTHASE GENE;<br>M95808                  | 0,208  |  | DAARVICRRSKLMTR  | MYCOBACTERIUM<br>BOVIS<br>MYCOCEROSIC ACID<br>SYNTHASE GENE;<br>M95808                  | 0,5602 |
| RDFARASFSYGLNAK | CAA17111.1;<br>PROBABLE<br>ISOCITRATE<br>DEHYDROGENASE                                  | 0,2078 |  | VYVTSEGMYGRVVKL  | TRANSMEMBRANE<br>SERINE/THREONINE-<br>PROTEIN KINASE D<br>PKND NP_215446                | 0,5358 |
| IKRFADRFARFNLQE | MYCOBACTERIUM<br>BOVIS ACYL-COA<br>SYNTHASE GENE;<br>U75685                             | 0,2071 |  | LLEQAAAVEEASDTA  | CAE55371.1; PPE<br>FAMILY PROTEIN                                                       | 0,534  |
| LKIAQGRLFYNRTL  | POSSIBLE<br>GLYCOSYL<br>TRANSFERASE<br>CAB05418                                         | 0,1868 |  | FYRRGLFGTIGPYNL  | POSSIBLE<br>GLYCOSYL<br>TRANSFERASE<br>CAB05419                                         | 0,5246 |
| DGRTLREIRYGSFRR | CAA17343.1; HEAT<br>SHOCK PROTEIN<br>HSP                                                | 0,1839 |  | SQMHSVSRLLAKSLAR | ALTERNATE RNA<br>POLYMERASE<br>SIGMA FACTOR SIGF<br>CAB07069                            | 0,5245 |
| VGDPDEHSLLAGREQ | MYCOBACTERIUM<br>BOVIS<br>MYCOCEROSIC ACID<br>SYNTHASE GENE;<br>M95808                  | 0,1807 |  | CIRAAARGAHIRSVT  | PUTATIVE<br>CYCLOPROPANE-<br>FATTY-ACYL-<br>PHOSPHOLIPID<br>SYNTHASE UFAA1<br>NP_854118 | 0,5159 |
| FTAHTKHRYVVSHPA | CAE55335.1; PE<br>FAMILY PROTEIN                                                        | 0,1789 |  | ERCGVEVTRAKVRRE  | RNA POLYMERASE<br>BETA'-SUBUNIT<br>AAA21417                                             | 0,5031 |
| KADVYGNTLGLFPF  | MYCOBACTERIUM<br>BOVIS<br>MYCOCEROSIC ACID<br>SYNTHASE GENE;<br>M95808                  | 0,1781 |  | GGATSLISYMLPRSP  | MYCOBACTERIUM<br>BOVIS ACYL-COA<br>SYNTHASE GENE;<br>U75685                             | 0,5025 |
| LRLMPENRPRTWLAS | POSSIBLE<br>GLYCOSYL<br>TRANSFERASE<br>CAB05415                                         | 0,1776 |  | AGAVMQVISRSEYRQ  | POSSIBLE<br>GLYCOSYL<br>TRANSFERASE<br>CAB05415                                         | 0,4996 |
| GPMVRKGTMKSQPWI | MTB81 (publication)                                                                     | 0,1774 |  | VKGAWVLARYDDGRP  | CONSERVED                                                                               | 0,499  |

|                 |                                                                                         |        |  |                 |                                                                                         |        |
|-----------------|-----------------------------------------------------------------------------------------|--------|--|-----------------|-----------------------------------------------------------------------------------------|--------|
|                 |                                                                                         |        |  |                 | HYPOTHETICAL<br>PROTEIN<br>TB18.5CAD93033                                               |        |
| WDLTSAEFTRRRYAE | CONSERVED<br>HYPOTHETICAL<br>PROTEIN CAB08634                                           | 0,1748 |  | LFIHRPDALARRIGR | PUTATIVE<br>CYCLOPROPANE-<br>FATTY-ACYL-<br>PHOSPHOLIPID<br>SYNTHASE UFAA1<br>NP_854118 | 0,4989 |
| FFGVRPVSILYRLYR | POSSIBLE<br>GLYCOSYL<br>TRANSFERASE<br>CAB05418                                         | 0,1699 |  | TELAQAQRRKIDRL  | PUTATIVE<br>CYCLOPROPANE-<br>FATTY-ACYL-<br>PHOSPHOLIPID<br>SYNTHASE UFAA1<br>NP_854118 | 0,495  |
| ANRLLRRTATHPLR  | PUTATIVE<br>CYCLOPROPANE-<br>FATTY-ACYL-<br>PHOSPHOLIPID<br>SYNTHASE UFAA1<br>NP_854118 | 0,1695 |  | NYRYAINNSFGFGGH | 3-OXOACYL-[ACYL-<br>CARRIER PROTEIN]<br>SYNTHASE 2 KASB<br>CAA94642                     | 0,4885 |
| FACDPRFNKLLGPLP | POSSIBLE<br>GLYCOSYL<br>TRANSFERASE<br>CAB05418                                         | 0,1662 |  | RLARQRVAAAGFGHR | PUTATIVE<br>CYCLOPROPANE-<br>FATTY-ACYL-<br>PHOSPHOLIPID<br>SYNTHASE UFAA1<br>NP_854118 | 0,4731 |
| EIGKADVYGNTLGL  | MYCOBACTERIUM<br>BOVIS<br>MYCOCEROSIC ACID<br>SYNTHASE GENE;<br>M95808                  | 0,1651 |  | RRERMGHIELAAPVT | RNA POLYMERASE<br>BETA'-SUBUNIT<br>AAA21417                                             | 0,473  |
| VRPFVLARSLDPSRY | POSSIBLE<br>GLYCOSYL<br>TRANSFERASE<br>CAB05418                                         | 0,1648 |  | RSEYRQAAARLADAF | POSSIBLE<br>GLYCOSYL<br>TRANSFERASE<br>CAB05415                                         | 0,4708 |
| RMRKFARSNHGTCAN | RNA POLYMERASE<br>BETA-SUBUNIT<br>AAA21416                                              | 0,1633 |  | DIILNTHGVPRRMNI | RNA POLYMERASE<br>BETA-SUBUNIT<br>AAA21416                                              | 0,4596 |
| MGCRLPGGINSPOKL | MYCOBACTERIUM<br>BOVIS<br>MYCOCEROSIC ACID<br>SYNTHASE GENE;<br>M95808                  | 0,1605 |  | KAVKEYARKHPHSMG | PROBABLE<br>ISOCITRATE<br>DEHYDROGENASE<br>CAA16247                                     | 0,4521 |
| YCGKYKRVRFKGIIC | RNA POLYMERASE<br>BETA'-SUBUNIT<br>AAA21417                                             | 0,1555 |  | RKYIAADRKILNEIA | POSSIBLE<br>GLYCOSYL<br>TRANSFERASE<br>CAB05418                                         | 0,4468 |
| ASDFAYLVDFGIARA | TRANSMEMBRANE<br>SERINE/THREONINE-<br>PROTEIN KINASE D<br>PKND NP_215446                | 0,1554 |  | NRAAALMAKLRGAA  | TWO COMPONENT<br>TRANSCRIPTIONAL<br>REGULATORY<br>PROTEIN DEVR<br>NP_217649             | 0,4113 |
| TIRVGSFRGRWLDPR | CAA16102.1; ESAT-6<br>LIKE PROTEIN ESXQ                                                 | 0,1474 |  | RVGRYKVNKKLGLHV | RNA POLYMERASE<br>BETA-SUBUNIT<br>AAA21416                                              | 0,4071 |
| SRTGSIYIVKPKMHG | MTB81 (publication)                                                                     | 0,1458 |  | RLVKLLYRLERPLL  | POSSIBLE<br>GLYCOSYL<br>TRANSFERASE<br>CAB05415                                         | 0,404  |
| VAITLWSQLYRRTL  | MYCOBACTERIUM<br>BOVIS ACYL-COA<br>SYNTHASE GENE;<br>U75685                             | 0,1403 |  | KGSQQEDEALYTEDR | MTB48 AAK31576                                                                          | 0,4011 |
| GAAFGLTTAHTPRR  | MYCOBACTERIUM<br>BOVIS<br>MYCOCEROSIC ACID<br>SYNTHASE GENE;<br>M95808                  | 0,1389 |  | WDLTSAEFTRRRYAE | CONSERVED<br>HYPOTHETICAL<br>PROTEIN CAB08634                                           | 0,3953 |

|                 |                                                                        |        |  |                  |                                                            |        |
|-----------------|------------------------------------------------------------------------|--------|--|------------------|------------------------------------------------------------|--------|
| DLVRRSPWGEMFAST | MYCOBACTERIUM BOVIS MYCOCEROSIC ACID SYNTHASE GENE; M95808             | 0,1389 |  | RDFARASFSYGLNAK  | CAA17111.1; PROBABLE ISOCITRATE DEHYDROGENASE              | 0,3855 |
| GRAGGGAALGGGGMG | MTB48 AAK31576                                                         | 0,1355 |  | SFYRPKRPGSYPIVL  | PERIPLASMIC PHOSPHATE-BINDING LIPOPROTEIN PSTS3 YP_177768  | 0,3787 |
| YVAWMSVTAGQAELT | CAE55371.1; PPE FAMILY PROTEIN                                         | 0,1354 |  | MTSAGGLLEQAAAVE  | CAE55371.1; PPE FAMILY PROTEIN                             | 0,3707 |
| TILKAYDGMFKDEFE | CAA17111.1; PROBABLE ISOCITRATE DEHYDROGENASE                          | 0,1256 |  | DSGFVTDGKMFIIGR  | MYCOBACTERIUM BOVIS ACYL-COA SYNTHASE GENE; U75685         | 0,3603 |
| AAAQFNASPVAQSYL | LOW MOLECULAR WEIGHT T-CELL ANTIGEN TB8.4 NP_215690                    | 0,1232 |  | GPMVRKGTMTKSQPWI | MTB81 (publication)                                        | 0,3553 |
| PPSLVAANRSRLMSL | PPE FAMILY PROTEIN CAE55334                                            | 0,1203 |  | WPVYLSTKNTILKAY  | CAA17111.1; PROBABLE ISOCITRATE DEHYDROGENASE              | 0,3529 |
| DPTQQIPKLVANNTR | CAB10044.1; SECRETED ANTIGEN 85-B FBPB (85B)                           | 0,1202 |  | FRHHAIHTIPSERFF  | POSSIBLE GLYCOSYL TRANSFERASE CAB05415                     | 0,3521 |
| FGGLTTAHTPRREPR | MYCOBACTERIUM BOVIS MYCOCEROSIC ACID SYNTHASE GENE; M95808             | 0,1178 |  | VGDPDEHSLLAGREQ  | MYCOBACTERIUM BOVIS MYCOCEROSIC ACID SYNTHASE GENE; M95808 | 0,3507 |
| RAPTESTRRCWTLVS | MYCOBACTERIUM BOVIS MYCOCEROSIC ACID SYNTHASE GENE; M95808             | 0,1167 |  | RFARFNLQERVIRPS  | MYCOBACTERIUM BOVIS ACYL-COA SYNTHASE GENE; U75685         | 0,3472 |
| AFAMTVPPSLVAANR | PPE FAMILY PROTEIN CAE55334                                            | 0,1164 |  | TATLLPFEEAPEMTS  | CAE55371.1; PPE FAMILY PROTEIN                             | 0,3462 |
| DARAADILKDESYKV | CAB08889.1; IRON-REGULATED CONSERVED HYPOTHETICAL PROTEIN              | 0,1123 |  | PSERFFGNLTQGRFY  | POSSIBLE GLYCOSYL TRANSFERASE CAB05415                     | 0,3446 |
| SSGLLRHAHCPVVII | HYPOTHETICAL PROTEIN RV2623 NP_217139                                  | 0,1105 |  | PSVMADVASGNLPAL  | CONSERVED HYPOTHETICAL PROTEIN CAA15739                    | 0,3374 |
| MSVAALAGMRREQPL | MYCOBACTERIUM BOVIS MYCOCEROSIC ACID SYNTHASE GENE; M95808             | 0,1071 |  | RVTPVAVIGMGCRPL  | MYCOBACTERIUM BOVIS MYCOCEROSIC ACID SYNTHASE GENE; M95808 | 0,3348 |
| RLARQRVAAAGFGHR | PUTATIVE CYCLOPROPANE-FATTY-ACYL-PHOSPHOLIPID SYNTHASE UFAA1 NP_854118 | 0,1052 |  | IKRFADRFARFNLQE  | MYCOBACTERIUM BOVIS ACYL-COA SYNTHASE GENE; U75685         | 0,3329 |
| RRSGSSRAPTESTRR | MYCOBACTERIUM BOVIS MYCOCEROSIC ACID SYNTHASE GENE; M95808             | 0,1045 |  | QAAAVEEASDTAAAN  | CAE55371.1; PPE FAMILY PROTEIN                             | 0,319  |
| QRVAVRVSQLHAGPR | CONSERVED HYPOTHETICAL PROTEIN CAB08634                                | 0,1039 |  | IAAAAKPPLGSPPPK  | CAA17582.1; PROBABLE SERINE PROTEASE PEPD                  | 0,3094 |
| TRHTQTWIKYIFPG  | PUTATIVE CYCLOPROPANE-                                                 | 0,1036 |  | MMGNAFLTALTNAGI  | CAB10947.1; PROBABLE                                       | 0,3017 |

|                 |                                                                                         |        |  |                 |                                                                             |        |
|-----------------|-----------------------------------------------------------------------------------------|--------|--|-----------------|-----------------------------------------------------------------------------|--------|
|                 | FATTY-ACYL-<br>PHOSPHOLIPID<br>SYNTHASE UFAA1<br>NP_854118                              |        |  |                 | LIPOPROTEIN LPRJ                                                            |        |
| AEDDCPPPGYDITAL | MYCOBACTERIUM<br>BOVIS<br>MYCOCEROSIC ACID<br>SYNTHASE GENE;<br>M95808                  | 0,1033 |  | NGIELCRDLLSRMPD | TWO COMPONENT<br>TRANSCRIPTIONAL<br>REGULATORY<br>PROTEIN DEVR<br>NP_217649 | 0,3012 |
| KDTKAVNPESTFSRI | PROBABLE<br>ISOCITRATE<br>DEHYDROGENASE<br>CAA16247                                     | 0,1023 |  | RRSGSSRAPTESTRR | MYCOBACTERIUM<br>BOVIS<br>MYCOCEROSIC ACID<br>SYNTHASE GENE;<br>M95808      | 0,2936 |
| AGAVMQVISRSEYRQ | POSSIBLE<br>GLYCOSYL<br>TRANSFERASE<br>CAB05415                                         | 0,0998 |  | FGGLTTAHTPRREPR | MYCOBACTERIUM<br>BOVIS<br>MYCOCEROSIC ACID<br>SYNTHASE GENE;<br>M95808      | 0,2863 |
| AMSLTVGAGVASADP | LOW MOLECULAR<br>WEIGHT T-CELL<br>ANTIGEN TB8.4<br>NP_215690                            | 0,0961 |  | DGRTLREIRYGSFRR | CAA17343.1; HEAT<br>SHOCK PROTEIN<br>HSP                                    | 0,2843 |
| TELAAQRRKIDRLL  | PUTATIVE<br>CYCLOPROPANE-<br>FATTY-ACYL-<br>PHOSPHOLIPID<br>SYNTHASE UFAA1<br>NP_854118 | 0,0959 |  | RHGLSSLGWNLCRIF | POSSIBLE<br>GLYCOSYL<br>TRANSFERASE<br>CAB05415                             | 0,284  |
| DLVYGDVIMRSTNFR | POSSIBLE<br>GLYCOSYL<br>TRANSFERASE<br>CAB05419                                         | 0,0952 |  | ATATATLLPFEEAPE | CAE55371.1; PPE<br>FAMILY PROTEIN                                           | 0,2801 |
| MIDGTSLRALLKQYG | TRANSMEMBRANE<br>SERINE/THREONINE-<br>PROTEIN KINASE D<br>PKND NP_215446                | 0,0949 |  | ATVSPAMVAANRTRL | PPE FAMILY<br>PROTEIN CAE55504                                              | 0,2754 |
| SADNMREYLAAGAKE | MTB48 AAK31576                                                                          | 0,0933 |  | PLNWLRRKHGLSSLG | POSSIBLE<br>GLYCOSYL<br>TRANSFERASE<br>CAB05418                             | 0,2735 |
| WSQLYRRTLNVAREL | MYCOBACTERIUM<br>BOVIS ACYL-COA<br>SYNTHASE GENE;<br>U75685                             | 0,0842 |  | MAKTIAYDEEARRGL | 60 kDa chaperonin 2<br>P0A521                                               | 0,2711 |
| VKKPETINYRTLKPE | RNA POLYMERASE<br>BETA'-SUBUNIT<br>AAA21417                                             | 0,0832 |  | YTEPILHRRRREFKA | MTB81 (publication)                                                         | 0,27   |
| RQRVAAAGFGHRVEI | PUTATIVE<br>CYCLOPROPANE-<br>FATTY-ACYL-<br>PHOSPHOLIPID<br>SYNTHASE UFAA1<br>NP_854118 | 0,0809 |  | AGAATEVELKERKHR | 60 kDa chaperonin 2<br>P0A521                                               | 0,2637 |
| PVAVIGMGCRLPGGI | MYCOBACTERIUM<br>BOVIS<br>MYCOCEROSIC ACID<br>SYNTHASE GENE;<br>M95808                  | 0,0773 |  | FNIRCFSPALVTRY  | POSSIBLE<br>GLYCOSYL<br>TRANSFERASE<br>CAB05419                             | 0,2446 |
| RVGRYKVNKKLGLHV | RNA POLYMERASE<br>BETA'-SUBUNIT<br>AAA21416                                             | 0,0751 |  | FGTIGPYNLRYRVLA | POSSIBLE<br>GLYCOSYL<br>TRANSFERASE<br>CAB05419                             | 0,239  |
| RAPKAVKEYARKHPH | PROBABLE<br>ISOCITRATE<br>DEHYDROGENASE<br>CAA16247                                     | 0,0748 |  | AERVGISQMHVSRL  | ALTERNATE RNA<br>POLYMERASE<br>SIGMA FACTOR SIGF<br>CAB07069                | 0,2359 |
| WSPQARRRFPLPDVP | POSSIBLE<br>GLYCOSYL                                                                    | 0,0744 |  | AFAMTVPPSLVAANR | PPE FAMILY<br>PROTEIN CAE55334                                              | 0,2342 |

|                 |                                                                        |        |  |                 |                                                                        |        |
|-----------------|------------------------------------------------------------------------|--------|--|-----------------|------------------------------------------------------------------------|--------|
|                 | TRANSFERASE<br>CAB05418                                                |        |  |                 |                                                                        |        |
| PEFQRHRDKIVQRCL | ALTERNATE RNA<br>POLYMERASE<br>SIGMA FACTOR SIGF<br>CAB07069           | 0,0739 |  | TTLALVSAPAGGRAA | PROBABLE<br>CUTINASE<br>PRECURSOR CFP21<br>NP_216500                   | 0,2311 |
| EKAIKERYARCLGSA | PROBABLE<br>ISOCITRATE<br>DEHYDROGENASE<br>CAA16247                    | 0,0737 |  | DFTPAAEIVKDGDGA | CAA17343.1; HEAT<br>SHOCK PROTEIN<br>HSP                               | 0,2213 |
| FRGEFTPKTQLTMLS | MCE-FAMILY<br>PROTEIN<br>MCE1AYP_177701                                | 0,0736 |  | AASAAPSIPAANMPP | CAA17582.1;<br>PROBABLE SERINE<br>PROTEASE PEPD                        | 0,2175 |
| MDFGLLPPEVNSSRM | PPE FAMILY<br>PROTEIN CAE55334                                         | 0,0725 |  | STGMSGGFVTAPTQG | YP_177963; PPE<br>FAMILY PROTEIN                                       | 0,2166 |
| GEAQLGNSSGNFLFP | PERIPLASMIC<br>PHOSPHATE-<br>BINDING<br>LIPOPROTEIN PSTS1<br>YP_177770 | 0,0724 |  | INAFSVGSGQTYGVD | CAB09453.1;<br>PROBABLE SERINE<br>PROTEASE PEPA                        | 0,2139 |
| VLASGLVAVSWAVG  | POSSIBLE<br>HEMOLYSIN-LIKE<br>PROTEIN CAA17201                         | 0,0714 |  | WDATATELNNALQNL | CAE55648                                                               | 0,2136 |
| QNTMKIGIMDEERRT | MTB81 (publication)                                                    | 0,0685 |  | YGRLRHGQILFTFLH | SECRETED L-<br>ALANINE<br>DEHYDROGENASE<br>ALD CAA15575                | 0,2054 |
| KYKRVRFKGIICERC | RNA POLYMERASE<br>BETA'-SUBUNIT<br>AAA21417                            | 0,0685 |  | ENPSARDQILPVYAE | MTB48 AAK31576                                                         | 0,1932 |
| YGRLRHGQILFTFLH | SECRETED L-<br>ALANINE<br>DEHYDROGENASE<br>ALD CAA15575                | 0,0667 |  | AEAADAIRAMSNAEH | MYCOBACTERIUM<br>BOVIS<br>MYCOCEROSIC ACID<br>SYNTHASE GENE;<br>M95808 | 0,1922 |
| TGRSLDMSVAALAGM | MYCOBACTERIUM<br>BOVIS<br>MYCOCEROSIC ACID<br>SYNTHASE GENE;<br>M95808 | 0,0666 |  | TATELNNALQNLART | CAE55648                                                               | 0,1917 |
| VEYVPSSEVDYMDVS | RNA POLYMERASE<br>BETA-SUBUNIT<br>AAA21416                             | 0,0662 |  | YNQLLGPLPFRHHAI | POSSIBLE<br>GLYCOSYL<br>TRANSFERASE<br>CAB05415                        | 0,1824 |
| IDGPAPDGYPIINYE | PERIPLASMIC<br>PHOSPHATE-<br>BINDING<br>LIPOPROTEIN PSTS1<br>YP_177770 | 0,065  |  | DANRALMGANMQRQA | RNA POLYMERASE<br>BETA-SUBUNIT<br>AAA21416                             | 0,1811 |
| GDFYAGEKSMTLDRA | PROBABLE<br>ISOCITRATE<br>DEHYDROGENASE<br>CAA16247                    | 0,0626 |  | MNPDIEKDQTSDEVT | CAB01474.1;<br>CONSERVED<br>HYPOTHETICAL<br>PROTEIN CFP17              | 0,177  |
| HSLLAGREQVRHLVR | MYCOBACTERIUM<br>BOVIS<br>MYCOCEROSIC ACID<br>SYNTHASE GENE;<br>M95808 | 0,0603 |  | TILKAYDGMFKDEFE | CAA17111.1;<br>PROBABLE<br>ISOCITRATE<br>DEHYDROGENASE                 | 0,1768 |
| YTEPILHRRRREFKA | MTB81 (publication)                                                    | 0,0597 |  | WSQLYRRTLNVAREL | MYCOBACTERIUM<br>BOVIS ACYL-COA<br>SYNTHASE GENE;<br>U75685            | 0,1726 |
| VRGDKVIAYARKFLD | MTB81 (publication)                                                    | 0,0593 |  | AAGFSGRAQVGKGMW | MTB81 (publication)                                                    | 0,1691 |
| VIPTMTPPPGMVRQR | CAA17582.1;<br>PROBABLE SERINE<br>PROTEASE PEPD                        | 0,0591 |  | GAAFGGLTTAHTPRR | MYCOBACTERIUM<br>BOVIS<br>MYCOCEROSIC ACID<br>SYNTHASE GENE;<br>M95808 | 0,1685 |
| DIILNTHGVPRRMNI | RNA POLYMERASE                                                         | 0,0587 |  | ERNPTQQIPKLVAN  | CAB10044.1;                                                            | 0,1631 |

|                 |                                                                        |        |  |                 |                                                                                                 |        |
|-----------------|------------------------------------------------------------------------|--------|--|-----------------|-------------------------------------------------------------------------------------------------|--------|
|                 | BETA-SUBUNIT<br>AAA21416                                               |        |  |                 | SECRETED ANTIGEN<br>85-B FBPB (85B)                                                             |        |
| DLATGTWLLFLGADD | POSSIBLE<br>GLYCOSYL<br>TRANSFERASE<br>CAB05419                        | 0,0571 |  | ANRLLRRTATHLPLR | PUTATIVE<br>CYCLOPROPANE-<br>FATTY-ACYL-<br>PHOSPHOLIPID<br>SYNTHASE UFAA1<br>NP_854118         | 0,1621 |
| DVILESAITTIMDFE | MTB81 (publication)                                                    | 0,0561 |  | LDRLLFKRNICHQAI | POSSIBLE<br>GLYCOSYL<br>TRANSFERASE<br>CAB05419                                                 | 0,1618 |
| GRGGYAGMLVGSVGE | HYPOTHETICAL<br>PROTEIN RV2623<br>NP_217139                            | 0,0558 |  | GVVLAGGESRRMGRD | CAA16030.1;<br>PROBABLE<br>MOLYBDOPTERIN-<br>GUANINE<br>DINUCLEOTIDE<br>BIOSYNTHESIS<br>PROTEIN | 0,1615 |
| MAKTIAYDEEARRGL | 60 kDa chaperonin 2<br>P0A521                                          | 0,0544 |  | RAPTESTRRCWTLVS | MYCOBACTERIUM<br>BOVIS<br>MYCOCEROSIC ACID<br>SYNTHASE GENE;<br>M95808                          | 0,1573 |
| GLRGLLRVISSEHPM | MYCOBACTERIUM<br>BOVIS<br>MYCOCEROSIC ACID<br>SYNTHASE GENE;<br>M95808 | 0,0526 |  | NNKAALEPVNPPKPP | MTB48 AAK31576                                                                                  | 0,1496 |
| GLGLFFASKLAAAGC | MYCOBACTERIUM<br>BOVIS<br>MYCOCEROSIC ACID<br>SYNTHASE GENE;<br>M95808 | 0,0511 |  | VAAMFGYHSAASAVA | PPE FAMILY<br>PROTEIN CAE55504                                                                  | 0,1483 |
| EAAAARSADVLCNGG | POSSIBLE<br>GLYCOSYL<br>TRANSFERASE<br>CAB05418                        | 0,0484 |  | DVTVSRRHAEFRLEN | CAB01474.1;<br>CONSERVED<br>HYPOTHETICAL<br>PROTEIN CFP17                                       | 0,1367 |
| TESTRRCWTLVSSRS | MYCOBACTERIUM<br>BOVIS<br>MYCOCEROSIC ACID<br>SYNTHASE GENE;<br>M95808 | 0,047  |  | VGNGYWQKPDESERT | MYCOBACTERIUM<br>BOVIS ACYL-COA<br>SYNTHASE GENE;<br>U75685                                     | 0,1357 |
| GGQFTLPGRSLMFVR | MTB81 (publication)                                                    | 0,0468 |  | TPGTGMPAAMPVPPT | MTB48 AAK31576                                                                                  | 0,128  |
| PTTYDHPTFAVHDTL | SECRETED L-<br>ALANINE<br>DEHYDROGENASE<br>ALD CAA15575                | 0,0461 |  | WSPQARRRFPLPDVP | POSSIBLE<br>GLYCOSYL<br>TRANSFERASE<br>CAB05418                                                 | 0,1277 |
| TIKAERTEQKDFDGR | CAA17245.1; HEAT<br>SHOCK PROTEIN<br>HSPX                              | 0,0436 |  | FRGEFTPKTQLTMLS | MCE-FAMILY<br>PROTEIN<br>MCE1AYP_177701                                                         | 0,1248 |
| ANRTRLASLVANLL  | PPE FAMILY<br>PROTEIN CAE55504                                         | 0,0417 |  | AMAAQLQAVPGAAQY | LOW MOLECULAR<br>WEIGHT T-CELL<br>ANTIGEN TB8.4<br>NP_215690                                    | 0,1226 |
| HDSDSVMPHPQQAPV | HYPOTHETICAL<br>PROTEIN RV2623<br>NP_217139                            | 0,0413 |  | VRPFVLARSLDPSRY | POSSIBLE<br>GLYCOSYL<br>TRANSFERASE<br>CAB05418                                                 | 0,1202 |
| IAKEIELEDPYEKIG | 60 kDa chaperonin 2<br>P0A521                                          | 0,041  |  | FKEMTLLELSDFVKK | CAB07109.1;<br>PROBABLE 50S<br>RIBOSOMAL<br>PROTEIN L7/L12<br>RPLL                              | 0,1107 |
| GDGGVSGFGNFGAGS | YP_177963; PPE<br>FAMILY PROTEIN                                       | 0,0408 |  | AAPSIPAANMPGGSV | CAA17582.1;<br>PROBABLE SERINE<br>PROTEASE PEPD                                                 | 0,1072 |
| EFEGELPRLFVVTRQ | MYCOBACTERIUM<br>BOVIS                                                 | 0,0399 |  | YPADPKTDQEKAKE  | PROBABLE<br>ISOCITRATE                                                                          | 0,0996 |

|                  |                                                     |        |  |                  |                                                                        |        |
|------------------|-----------------------------------------------------|--------|--|------------------|------------------------------------------------------------------------|--------|
|                  | MYCOCEROSIC ACID SYNTHASE GENE; M95808              |        |  |                  | DEHYDROGENASE CAA16247                                                 |        |
| GGATSLISYMLPRSP  | MYCOBACTERIUM BOVIS ACYL-COA SYNTHASE GENE; U75685  | 0,0382 |  | SQFGPYQLLRLLGRG  | TRANSMEMBRANE SERINE/THREONINE-PROTEIN KINASE D PKND NP_215446         | 0,095  |
| RCLPLADHIARRFEG  | ALTERNATE RNA POLYMERASE SIGMA FACTOR SIGF CAB07069 | 0,0376 |  | DVVVLLSEMKMEIPV  | CAB08316.1; BIOTINYLATED PROTEIN TB7.3                                 | 0,0858 |
| VAAMFGYHSAASAVA  | PPE FAMILY PROTEIN CAE55504                         | 0,0371 |  | YQAGKPTSTNPIASI  | CAA17111.1; PROBABLE ISOCITRATE DEHYDROGENASE                          | 0,0794 |
| LTAANTKKVAMAAPM  | POSSIBLE GLYCOSYL TRANSFERASE CAB05419              | 0,0368 |  | SYNTGSFNVGDTNTG  | YP_177963; PPE FAMILY PROTEIN                                          | 0,0779 |
| GNRGDANIGIGNIGD  | PPE FAMILY PROTEIN CAE55504                         | 0,0363 |  | ADDEGYPKRARMMLMD | CONSERVED HYPOTHETICAL PROTEIN TB16.3CAD97060                          | 0,0626 |
| TLTWSQLYRRTLNV   | MYCOBACTERIUM BOVIS ACYL-COA SYNTHASE GENE; U75685  | 0,0341 |  | SSGLLRHAHCPVVII  | HYPOTHETICAL PROTEIN RV2623 NP_217139                                  | 0,0544 |
| SPAMVAANRTRLASL  | PPE FAMILY PROTEIN CAE55504                         | 0,0339 |  | PDSDMTTAVMRPSKT  | PROBABLE ISOCITRATE DEHYDROGENASE CAA16247                             | 0,045  |
| ERNPTQIQIPKLVAN  | CAB10044.1; SECRETED ANTIGEN 85-B FBPB (85B)        | 0,0337 |  | NELVRVYVAQKRKIS  | RNA POLYMERASE BETA-SUBUNIT AAA21416                                   | 0,0405 |
| AEFPDYLTEEQRVPD  | PROBABLE ISOCITRATE DEHYDROGENASE CAA16247          | 0,0334 |  | VPPPVIAENRAELMI  | CAE55371.1; PPE FAMILY PROTEIN                                         | 0,0383 |
| PKVISRAMVMRTVIS  | POSSIBLE GLYCOSYL TRANSFERASE CAB05419              | 0,0334 |  | LPDFLGGFAGLPSLG  | CAB06237.1; CONSERVED HYPOTHETICAL PROTEIN                             | 0,0381 |
| EGYPKRARMMLMDAAI | CONSERVED HYPOTHETICAL PROTEIN TB16.3CAD97060       | 0,0327 |  | EAVGYRSWPRYFAAL  | PUTATIVE CYCLOPROPANE-FATTY-ACYL-PHOSPHOLIPID SYNTHASE UFAA1 NP_854118 | 0,0362 |
| LYLTIMTLMNATNLR  | CAB06237.1; CONSERVED HYPOTHETICAL PROTEIN          | 0,0318 |  | TIRVGSFRGRWLDPR  | CAA16102.1; ESAT-6 LIKE PROTEIN ESXQ                                   | 0,0323 |
| RVGFPQHVENALRLM  | POSSIBLE GLYCOSYL TRANSFERASE CAB05415              | 0,0312 |  | KADVYGNTLGLFPF   | MYCOBACTERIUM BOVIS MYCOCEROSIC ACID SYNTHASE GENE; M95808             | 0,0238 |
| EGVARVLTQPRFRGW  | POSSIBLE HEMOLYSIN-LIKE PROTEIN CAA17201            | 0,0306 |  | LDEHGTVLLAVRGLR  | MYCOBACTERIUM BOVIS MYCOCEROSIC ACID SYNTHASE GENE; M95808             | 0,0238 |
| NELVRVYVAQKRKIS  | RNA POLYMERASE BETA-SUBUNIT AAA21416                | 0,03   |  | YELEGAVKRADLVIG  | SECRETED L-ALANINE DEHYDROGENASE ALD CAA15575                          | 0,0127 |
| TLAKIFNGSITQWNN  | PERIPLASMIC PHOSPHATE-BINDING                       | 0,0295 |  | NSGVSMNTLSSMLK   | CAE55371.1; PPE FAMILY PROTEIN                                         | 0,0126 |

|                 |                                                                          |        |  |                 |                                                                                         |         |
|-----------------|--------------------------------------------------------------------------|--------|--|-----------------|-----------------------------------------------------------------------------------------|---------|
|                 | LIPOPROTEIN PSTS3<br>YP_177768                                           |        |  |                 |                                                                                         |         |
| VIGVAGNLDQHLNME | POSSIBLE<br>GLYCOSYL<br>TRANSFERASE<br>CAB05415                          | 0,0293 |  | FRSGYLDVYQWTLIR | PUTATIVE<br>CYCLOPROPANE-<br>FATTY-ACYL-<br>PHOSPHOLIPID<br>SYNTHASE UFAA1<br>NP_854118 | 0,0088  |
| VYVTSEGMYGRVVKL | TRANSMEMBRANE<br>SERINE/THREONINE-<br>PROTEIN KINASE D<br>PKND NP_215446 | 0,0282 |  | VVAVGPGRWDEDGEK | CAB01005.1; 10 KDA<br>CHAPERONIN<br>GROES                                               | 0,0012  |
| GLFNSGSFNTGIGNS | YP_177963; PPE<br>FAMILY PROTEIN                                         | 0,0253 |  | VEYVPSSEVDYMDVS | RNA POLYMERASE<br>BETA-SUBUNIT<br>AAA21416                                              | -0,0021 |
| LFNVGGFNTGVANVG | YP_177963; PPE<br>FAMILY PROTEIN                                         | 0,0246 |  | GKSPGFGTTVDFAV  | PERIPLASMIC<br>PHOSPHATE-<br>BINDING<br>LIPOPROTEIN PSTS1<br>YP_177770                  | -0,0087 |
| DGVGALLRYAATNRL | CONSERVED<br>HYPOTHETICAL<br>PROTEIN CAB08634                            | 0,0241 |  | TRIEAVPIAGFAQMR | 3-OXOACYL-[ACYL-<br>CARRIER PROTEIN]<br>SYNTHASE 2 KASB<br>CAA94642                     | -0,0095 |
| RFARFNLQERVIRPS | MYCOBACTERIUM<br>BOVIS ACYL-COA<br>SYNTHASE GENE;<br>U75685              | 0,0232 |  | VGISQMHVSRLLAKS | ALTERNATE RNA<br>POLYMERASE<br>SIGMA FACTOR SIGF<br>CAB07069                            | -0,0119 |
| GGLNSGTGNIGLFNS | YP_177963; PPE<br>FAMILY PROTEIN                                         | 0,0221 |  | SADNMREYLAAGAKE | MTB48 AAK31576                                                                          | -0,0198 |
| LDRLLFKRNICHQAI | POSSIBLE<br>GLYCOSYL<br>TRANSFERASE<br>CAB05419                          | 0,0219 |  | AEFPDYLTEEQRVPD | PROBABLE<br>ISOCITRATE<br>DEHYDROGENASE<br>CAA16247                                     | -0,0231 |
| NANIGFGNRGDANIG | PPE FAMILY<br>PROTEIN CAE55504                                           | 0,0201 |  | VAASDLAYTLARGRR | MYCOBACTERIUM<br>BOVIS<br>MYCOCEROSIC ACID<br>SYNTHASE GENE;<br>M95808                  | -0,0241 |
| PPQEQGLIPGFLMPP | MTB48 AAK31576                                                           | 0,0196 |  | FTLPGERIHVVFRSD | PERIPLASMIC<br>PHOSPHATE-<br>BINDING<br>LIPOPROTEIN PSTS3<br>YP_177768                  | -0,0268 |
| MLVTAVVLLCCSGVA | CAA98382.1;<br>IMMUNOGENIC<br>PROTEIN MPT64                              | 0,0196 |  | SKLMTRIAGAGAMGS | MYCOBACTERIUM<br>BOVIS<br>MYCOCEROSIC ACID<br>SYNTHASE GENE;<br>M95808                  | -0,0279 |
| SRPQSSSNNSVPGAP | RNA POLYMERASE<br>BETA-SUBUNIT<br>AAA21416                               | 0,0171 |  | DMEGTFARPMTELVT | 3-OXOACYL-[ACYL-<br>CARRIER PROTEIN]<br>SYNTHASE 2 KASB<br>CAA94642                     | -0,0285 |
| DMEGTFARPMTELVT | 3-OXOACYL-[ACYL-<br>CARRIER PROTEIN]<br>SYNTHASE 2 KASB<br>CAA94642      | 0,0169 |  | APEMTSAGGLLEQAA | CAE55371.1; PPE<br>FAMILY PROTEIN                                                       | -0,0288 |
| TGNLGLFNSTGNIG  | YP_177963; PPE<br>FAMILY PROTEIN                                         | 0,0167 |  | TMPHHRMLATRHTQT | PUTATIVE<br>CYCLOPROPANE-<br>FATTY-ACYL-<br>PHOSPHOLIPID<br>SYNTHASE UFAA1<br>NP_854118 | -0,0291 |
| MSGQADTATTAEART | POSSIBLE<br>HEMOLYSIN-LIKE<br>PROTEIN CAA17201                           | 0,0157 |  | ILTVSVAVSEGKPTE | CAA17245.1; HEAT<br>SHOCK PROTEIN<br>HSPX                                               | -0,03   |
| VNIGASDAYLSEGDM | PERIPLASMIC<br>PHOSPHATE-<br>BINDING                                     | 0,0146 |  | VRDLIARWEQRDVMA | MYCOBACTERIUM<br>BOVIS<br>MYCOCEROSIC ACID                                              | -0,031  |

|                 |                                                                          |        |  |                 |                                                                             |         |
|-----------------|--------------------------------------------------------------------------|--------|--|-----------------|-----------------------------------------------------------------------------|---------|
|                 | LIPOPROTEIN PSTS1<br>YP_177770                                           |        |  |                 | SYNTHASE GENE;<br>M95808                                                    |         |
| SAITDADFKAAGAQL | SECRETED L-<br>ALANINE<br>DEHYDROGENASE<br>ALD CAA15575                  | 0,0142 |  | YVAWMSVTAGQAELT | CAE55371.1; PPE<br>FAMILY PROTEIN                                           | -0,0315 |
| NNSFGFGGHNVAIAF | 3-OXOACYL-[ACYL-<br>CARRIER PROTEIN]<br>SYNTHASE 2 KASB<br>CAA94642      | 0,0138 |  | RMTSGSSSGFKVRPS | YP_177963; PPE<br>FAMILY PROTEIN                                            | -0,0345 |
| GGNLGGQNGLGNLG  | YP_177963; PPE<br>FAMILY PROTEIN                                         | 0,0129 |  | QRHRDKIVQRCLPLA | ALTERNATE RNA<br>POLYMERASE<br>SIGMA FACTOR SIGF<br>CAB07069                | -0,0419 |
| VGASGNNGTSALLQT | PERIPLASMIC<br>PHOSPHATE-<br>BINDING<br>LIPOPROTEIN PSTS2<br>YP_177769   | 0,0127 |  | DAQSIQAAAAGFASK | PERIPLASMIC<br>PHOSPHATE-<br>BINDING<br>LIPOPROTEIN PSTS1<br>YP_177770      | -0,0453 |
| QLATWVEEHQDCVAA | MYCOBACTERIUM<br>BOVIS<br>MYCOCEROSIC ACID<br>SYNTHASE GENE;<br>M95808   | 0,0122 |  | ANRTRLASLVAANLL | PPE FAMILY<br>PROTEIN CAE55504                                              | -0,0461 |
| FNSGDGGVSGFGNFG | YP_177963; PPE<br>FAMILY PROTEIN                                         | 0,0115 |  | RYARCLGSAVNPVLR | PROBABLE<br>ISOCITRATE<br>DEHYDROGENASE<br>CAA16247                         | -0,0467 |
| NNQTVLPFDGLNYPE | TRANSMEMBRANE<br>SERINE/THREONINE-<br>PROTEIN KINASE D<br>PKND NP_215446 | 0,0113 |  | ELAIPMSGIAMAVVG | CAB06237.1;<br>CONSERVED<br>HYPOTHETICAL<br>PROTEIN                         | -0,0479 |
| VEQAALQSAWQGDTG | CAA17363.1; LOW<br>MOLECULAR<br>WEIGHT PROTEIN<br>ANTIGEN 7 ESXH         | 0,0106 |  | TSYTSDEAMLDAILA | TWO COMPONENT<br>TRANSCRIPTIONAL<br>REGULATORY<br>PROTEIN DEVR<br>NP_217649 | -0,0482 |
| ATATATLLPFEEAPE | CAE55371.1; PPE<br>FAMILY PROTEIN                                        | 0,0102 |  | QNTMKIGIMDEERRT | MTB81 (publication)                                                         | -0,0484 |
| AMNRGVDLATGTWLL | POSSIBLE<br>GLYCOSYL<br>TRANSFERASE<br>CAB05419                          | 0,01   |  | PLSGLTHKRRLSALG | RNA POLYMERASE<br>BETA-SUBUNIT<br>AAA21416                                  | -0,0499 |
| NALFAGPAKMLRLNA | YP_177963; PPE<br>FAMILY PROTEIN                                         | 0,01   |  | TESTRRCWTLVSSRS | MYCOBACTERIUM<br>BOVIS<br>MYCOCEROSIC ACID<br>SYNTHASE GENE;<br>M95808      | -0,0518 |
| AFLAAQELILSGAQQ | MTB81 (publication)                                                      | 0,0096 |  | AAAQFNASPVAQSYL | LOW MOLECULAR<br>WEIGHT T-CELL<br>ANTIGEN TB8.4<br>NP_215690                | -0,0531 |
| DSALLAAAGFGNTTA | MCE-FAMILY<br>PROTEIN<br>MCE1AYP_177701                                  | 0,009  |  | EGVARVLTKPRFRGW | POSSIBLE<br>HEMOLYSIN-LIKE<br>PROTEIN CAA17201                              | -0,0553 |
| GSTAQANAMTRFVNV | PERIPLASMIC<br>PHOSPHATE-<br>BINDING<br>LIPOPROTEIN PSTS3<br>YP_177768   | 0,0085 |  | ILVQANEAEATTASG | CAB01005.1; 10 KDA<br>CHAPERONIN<br>GROES                                   | -0,0559 |
| LKMCWPAAPRSVGVP | POSSIBLE<br>HEMOLYSIN-LIKE<br>PROTEIN CAA17201                           | 0,0085 |  | GAPNRVSFAKLREPL | RNA POLYMERASE<br>BETA-SUBUNIT<br>AAA21416                                  | -0,0561 |
| GKLKDTKAVNPESTF | PROBABLE<br>ISOCITRATE<br>DEHYDROGENASE<br>CAA16247                      | 0,0076 |  | VRPVSYLYRLYRPLI | POSSIBLE<br>GLYCOSYL<br>TRANSFERASE<br>CAB05418                             | -0,0571 |
| RVAGAYKAPAETQAQ |                                                                          | 0,0075 |  | TRHTQTWIKYIFPG  |                                                                             | -0,0574 |
| QGYGSLGLMTSVLMT |                                                                          | 0,0074 |  | DVDKDVNVELDPGQP |                                                                             | -0,0588 |

|                  |         |                  |         |
|------------------|---------|------------------|---------|
| DAFPNEFPDPTISVQ  | 0,0064  | GLGLFFASKLAAAGC  | -0,0622 |
| VKAPGFGDRRKAMLQ  | 0,0053  | YPEGLAVDTQGA VYV | -0,0637 |
| AARSAVVLCNGGSPT  | 0,0048  | PIPEGLTTGRSCQTD  | -0,0647 |
| DANRALMGANMQRQA  | 0,0047  | RVSVGNLRIARVLYD  | -0,0674 |
| YTSGSTRTPAGVVMS  | 0,0042  | TWKLLLD RQSGIRTL | -0,0678 |
| VVAVGPGRWDEDGEK  | 0,0027  | LERPVGDDSSDCGTIR | -0,0698 |
| AAGFSGRAQVGKGMW  | 0,0026  | TGNLGLFNSTGNIG   | -0,072  |
| QKVQAAGNNMAQTDS  | 0,0018  | TGMELRAAIDAATSS  | -0,073  |
| ARTISEAGQAMASTE  | -0,0013 | GRAGGG AALGGGGMG | -0,0739 |
| VGAGERKMSALVDAS  | -0,0013 | PLDDGDVIDSMFMSK  | -0,0752 |
| PGEPTTKESAQTLE   | -0,0017 | ARDADMLSELGEPVD  | -0,0787 |
| FVTDGKMFIIIGRIKD | -0,0018 | RVQAAATIKRFADRFA | -0,0789 |
| VGSWIGSSAGLMVAA  | -0,0023 | YQQRSEKVLTEYNNK  | -0,0794 |
| KIHARSTGPYSMITQ  | -0,0029 | PRRPRRCWPRSRCP   | -0,0801 |
| CAPVFVMAAPGQPLP  | -0,0031 | FTAHTKH YRVVSKPA | -0,0829 |
| AERVGISQMHVSRLL  | -0,0043 | AGNLGLFNSTGNIG   | -0,0878 |
| QEITRGRCAAISVPG  | -0,0044 | RKIPLTLVHAVSPEV  | -0,0882 |
| YELEGAVKRADLVIG  | -0,0049 | TRGRCAAISVPGDRR  | -0,0902 |
| SRMYSGPGPESMLAA  | -0,0052 | FVTDGKMFIIIGRIKD | -0,0914 |
| FAGYTGAESPTSVL   | -0,0055 | NRANEVEAPMADPPT  | -0,0921 |
| DSGFVTDGKMFIIIGR | -0,0077 | VGA NEVGAANAGSGN | -0,0981 |
| LEKDNTVGTDEALLD  | -0,0084 | LVDFGIARAASDPGL  | -0,1036 |
| PNGYTFKEDEYPSTA  | -0,0089 | AAERGPQMLGGLPV   | -0,105  |
| NYNLPGVSEHLKLNG  | -0,0098 | ASGLVIPDTAKEKPQ  | -0,1059 |
| GAGTVYVTDNFNRVV  | -0,0102 | PGAARWSPGDSATVA  | -0,1066 |
| SGMTSQAATFAANRL  | -0,0118 | LLKGAKEVETKEQIA  | -0,1082 |
| WDGVAITLTWSQLYR  | -0,012  | HSLLAGREQVRHLVR  | -0,1083 |
| AHMKPGAVLVDAID   | -0,0124 | PLAGVVLAGGESRRM  | -0,1106 |
| DAARVICRRSKLMTR  | -0,0127 | NTMAMMARDTAEAAK  | -0,1117 |
| WDATATELNALQNL   | -0,0129 | SSDLRVGQPVLAIGS  | -0,1136 |
| KIDPPPPPEQGLIP   | -0,0131 | PELVPTYNL PANHRY | -0,1203 |
| AMRTL RKYVEADLRV | -0,0144 | EIGKADVYGNTRLGL  | -0,1232 |
| VAPVSPSTASSRTDT  | -0,0144 | LLRYAATNRLGSHRS  | -0,1234 |
| VLSACGNDDNVTGGG  | -0,015  | MLEGCILADSRQSKT  | -0,1262 |
| QTYGVDVVG YDRTQD | -0,0151 | MEAGPMVRKGTMSQ   | -0,1268 |
| TGQHTGLRIVDAASL  | -0,0153 | AGVLLRTERLKSQRV  | -0,1296 |
| VAASDLAYTLARGRR  | -0,0153 | VSEHLKLNKVLAAAM  | -0,132  |
| VDGAPINSATAMADA  | -0,0154 | TGDEVTYRADIYALA  | -0,1361 |
| LVVGNNGGPGVTALVM | -0,0159 | FFGVRPVSILYRLYR  | -0,1365 |
| GQRCAPVFVMAAPGQ  | -0,016  | NSTELPSSGFNTGG   | -0,1409 |
| SPSRKTGELDN RGSQ | -0,0163 | SEAIAASYDAGVLT V | -0,1433 |
| DVTVSRRHAEFRLEN  | -0,0164 | AQAASLEAEHQAIVR  | -0,1444 |
| QAAAVEEASDTAAAN  | -0,0168 | VNIGASDAYLSEGD M | -0,1456 |
| QNAASIAGLFLTTEA  | -0,0169 | QTYGVDVVG YDRTQD | -0,1478 |
| ALGDNWIVGASNSTG  | -0,0172 | TTVALGRSVCPMVVA  | -0,1489 |
| ERCGVEVTRAKVRRE  | -0,0172 | VFRARMQREADTAGR  | -0,1505 |
| NNKAALEPVNPPKPP  | -0,0174 | DNQSGIGGLNSGTGN  | -0,1507 |
| EFRLNNEFNVDVG    | -0,0179 | LSSMLKGFAPAAAAQ  | -0,1519 |
| EIELEDPYEKIG AEL | -0,0182 | NALFAGPAKMLRLNA  | -0,1523 |
| FGKPANPDVLVVGNG  | -0,0183 | LRISSQLLANWLRHG  | -0,1594 |
| APAQANPVDDAFIAA  | -0,0187 | QLAEHFASLADVLTK  | -0,1596 |
| APSLFIHRPDALARR  | -0,02   | QPVVLA AATGDLPTI | -0,1604 |
| LNSLTYDVSVAQGV T | -0,0205 | DSVAAVDAADKVLGY  | -0,1628 |
| IAAAAKPPLGSPPPK  | -0,0206 | LIPGFLMPPSDGSGV  | -0,1634 |
| NGTPNELGGANIPAE  | -0,0206 | TLTWSQLYRRTL NVA | -0,1657 |
| MVDFGALPPEINSAR  | -0,0221 | GPYLQRGVADLVPTA  | -0,1676 |
| AAGTAAQAAVVRFQE  | -0,0226 | KDTKAVNPESTFSRI  | -0,1685 |
| HSTVLVAPVSPSTAS  | -0,0228 | EFRLNNEFNVDVG    | -0,1718 |
| SGFFNSGDGGVSGFG  | -0,0231 | YVAQKRKISDGDKLA  | -0,174  |
| GADGKLKDTKAVNPE  | -0,0231 | TGMPAAPMVPPTGSP  | -0,1747 |
| DVDKDVNVELDPGQP  | -0,0232 | HDEDSVM PHPQQAPV | -0,1762 |
| DKGDVVVLLES MKME | -0,0237 | EIVKDGDDAVVRLEL  | -0,1775 |
| AHVVRPFALAQSLDP  | -0,0242 | TAAQNGVRAMSSLGS  | -0,1784 |
| SMTNSGVSMNTLSS   | -0,0242 | PAVFAVQVALAATME  | -0,179  |
| GNIGLGNAGSGNVGF  | -0,0243 | EKAIKERYARCLGSA  | -0,1812 |
| CIRAAARGAHIRSVT  | -0,0244 | RNFLAAPPQRAAMA   | -0,1822 |

|                  |         |                  |         |
|------------------|---------|------------------|---------|
| TANGSGAGISEFNGN  | -0,0246 | LGGQNLGLGNLGDGN  | -0,1837 |
| PTQYRQPYEALGGTR  | -0,0252 | HEGQTTMTVPGGVEV  | -0,1873 |
| NVTGGGATTGQASAK  | -0,0255 | DLARVGRYKVNKKLG  | -0,1902 |
| DAQSIQAAAAGFASK  | -0,0265 | GQARLAASAFEATLA  | -0,1934 |
| NGTSALLQTTDGSIT  | -0,0271 | LKIAQGRLFYNTRTL  | -0,1937 |
| KRADHSMIFVFIAGS  | -0,0281 | KGAGKSFQGGVGEGA  | -0,1942 |
| AHTPRREPRRCWPRS  | -0,0282 | GTAVSARNTAVCAPT  | -0,1972 |
| LVDAADPEVVVFSGE  | -0,0283 | PILDDLAAALADIAP  | -0,1978 |
| GLPQNTMKIGIMDEE  | -0,0287 | AHTPRREPRRCWPRS  | -0,1988 |
| DYMDVSPRQMVSVAT  | -0,0289 | NPGELLPEAAGPTQV  | -0,1989 |
| AESNNQVVLPFTDIT  | -0,0291 | MVDFGALPPEINSAR  | -0,2008 |
| AVLDPDHDGMRVQVR  | -0,0293 | WDGVAILTWSQLYR   | -0,201  |
| ELTRVLTVLASVDE   | -0,0296 | FGVRLVKLLYRLERP  | -0,2049 |
| LVAANRSRLMSLVAA  | -0,03   | IEYRSLARVYGAGTP  | -0,2061 |
| RSNPALAKGLSTHEG  | -0,0304 | RVVRVTGRASARGLI  | -0,2062 |
| RVVRVTGRASARGLI  | -0,0307 | VGADEDDIKATYDKG  | -0,2072 |
| DSVAAVDAADKVLGY  | -0,0314 | APSLFIHRPDALARR  | -0,2087 |
| NVVDVGSNLNGTYVNR | -0,0316 | GLFNSGSFNTGIGNS  | -0,2096 |
| MEAGPMVRKGTMKSQ  | -0,0322 | HEHRPELAMVDSARG  | -0,2098 |
| GQARLAASAFEATLA  | -0,0322 | YPITGKLSELMTMD   | -0,2108 |
| VGAGTGIVIDPNGVV  | -0,0325 | GLNYPEGLAVDTQGA  | -0,2116 |
| MMGNAFLTALTNAGI  | -0,0329 | AHLRPGLDLSFTLT   | -0,2124 |
| ADPGEVMKAIADIEA  | -0,033  | AGSWLLIDTSNAVDT  | -0,2127 |
| SDGTATGAADPRAPS  | -0,0331 | GVDVVGYDRTQDVAV  | -0,2128 |
| ARQTCGDFELVLVDG  | -0,0334 | EPVVAMGNSGGQGGT  | -0,214  |
| SYNTGSFNVGDTNTG  | -0,0336 | AENRAELMILIATNL  | -0,2146 |
| GLGDKFGESIVNANT  | -0,0342 | EFFAIPGFALPGLP   | -0,2165 |
| PDTISGATIPQGEQS  | -0,0344 | MDFGLLPPEVNSSRM  | -0,2173 |
| TILRRGDNATLLATP  | -0,0348 | PFNVNLKLQLHDAF   | -0,2216 |
| RGGPGGAPGCWQPIT  | -0,0348 | ALGQTVQASDSLGA   | -0,2222 |
| TSSQESGVIEEVSA   | -0,0349 | APTTGVLPPAANDVS  | -0,2238 |
| AQAASLEAEHQAIVR  | -0,0353 | TSSSQESGVIEEVSA  | -0,2249 |
| PDEHSLLAGREQVRH  | -0,0355 | ITTTAGPQLVVPVLN  | -0,2272 |
| GLGNAGSSNYGLANL  | -0,0356 | NRVSFAKLREPLEVP  | -0,2275 |
| WGGPPVASEVRGDAA  | -0,036  | EIELEDPYEKIGAEI  | -0,2279 |
| KLRPGEPPTKESAQT  | -0,0365 | ARWSPGDSATVAGPL  | -0,2296 |
| LGIGNIGLNAGSTN   | -0,037  | LPDIIDGLWPPKLPD  | -0,2312 |
| LLRYAATNRLGSHRS  | -0,0371 | LPQWLSANRAVKPTG  | -0,232  |
| VRDLIARWEQRDVMA  | -0,0371 | AVCAPTTGVLPPAAN  | -0,2324 |
| GITGNGQIGFGKPAN  | -0,0377 | PAATIDQLKTDKLL   | -0,236  |
| DFAGSDVPLNPSTGQ  | -0,0378 | DDLMMVNAGLVCGGV  | -0,2369 |
| LLEQAAAVEEASDTA  | -0,0388 | SLIGLAMGDAGGYKA  | -0,2375 |
| EDYLVLTITTAGGLAS | -0,0392 | LVAANRSRLMSLVAA  | -0,2414 |
| QSGLSIVMPVGGQSS  | -0,0402 | EAVIGNRRRQDSKES  | -0,2421 |
| PRREPRRCWPRSRCP  | -0,0402 | PAVPGALGENGNNGM  | -0,2496 |
| GLGGLGLFFASKLAA  | -0,041  | IRGTFSKSAVKAPGF  | -0,2509 |
| DGPTLAKIFNGSITQ  | -0,041  | GLYNTGGLPPGTPAV  | -0,2514 |
| NNAVGAGTGIVIDPN  | -0,0415 | YTSGSTRTPAGVMS   | -0,2519 |
| ATLAHVVRPFVLARS  | -0,0416 | LLKQYGPLTPARAVA  | -0,2531 |
| NAGSSNYGLANLGVG  | -0,0417 | QAIFYRRGLFGTIGP  | -0,2543 |
| ERLIHRDTDQGVYD   | -0,0422 | WLLIDTSNAVDTPDM  | -0,2552 |
| AATQAAGAGAVADAQ  | -0,0423 | LEGTYRLAPKSGSTE  | -0,2553 |
| FAGAGLGPMPLAAASA | -0,0432 | IKGMELARAVKDVGA  | -0,2591 |
| AANMPPGSVEQVAAK  | -0,0434 | HGMLTDORDIVIKGLA | -0,2598 |
| VFAPTNAAFDKLPAA  | -0,0434 | GIRLTPKVIATNKTA  | -0,2609 |
| GDVITAVDGAPINSA  | -0,0435 | GLGGLGLFFASKLAA  | -0,2621 |
| GSGAGISEFNGNQTD  | -0,0437 | RRLKELHLRLGTATA  | -0,2621 |
| VQAKPAAAASLAIA   | -0,044  | TILRRGDNATLLATP  | -0,2621 |
| TSVLMTADGKTVEAE  | -0,0446 | LIATNLLGQNTPAIA  | -0,2657 |
| ARMQREADTAGRLTE  | -0,0459 | TPADGSAPIVHEMVS  | -0,2658 |
| ADDEGYPKRARMMLMD | -0,0459 | AARSAVVLCSNGGSPT | -0,2658 |
| TAAQNGVRRAMSSLGS | -0,0462 | DESERTFGGKIVTPS  | -0,2666 |
| AMFGYAAATATATAT  | -0,0465 | ASDFAYLVDFGIARA  | -0,2669 |
| QAAGNNMAQTDSAVG  | -0,0471 | PLPTLPVPVLRDELP  | -0,2679 |
| GTGSTGLFNAGNFNT  | -0,0476 | FAWTRGLQHRGKLDG  | -0,2701 |
| DRAGVKDVILESAIT  | -0,0477 | QQVSIAPNAGLDPVN  | -0,2706 |

|                  |         |                 |         |
|------------------|---------|-----------------|---------|
| HPDSDIFLDDVTVSR  | -0,0482 | HIGLYGNAGGLGPTQ | -0,2709 |
| AADILKDESYKVGT   | -0,0487 | PDEHSLLAGREQVRH | -0,2743 |
| GSDVPLNPSTGQPD   | -0,0489 | RAGAGVLLRTERLKS | -0,2746 |
| VGGGNVGFNGIDAN   | -0,0489 | MYCPSVMADVASGNL | -0,275  |
| QVRRPGDLQTLFVA   | -0,0491 | AIPPRGTQAVVLKVY | -0,2751 |
| GDVQSDTVAQGYGSL  | -0,0492 | PPQEQLIPGFLMPP  | -0,2753 |
| GVAVDSAGNVYVTSE  | -0,05   | PTTYDHPTFAVHDTL | -0,2754 |
| TRFVNVFEQACPGQT  | -0,05   | LESSLLKSLEGTyr  | -0,2782 |
| DIGIKTGNERAKLLG  | -0,0504 | VGADPTSDIAVVRVQ | -0,2795 |
| EVLLKIAQGRLFYNT  | -0,0506 | NAGSTNVGLANMGVG | -0,2821 |
| TSAGREAAALSGDVA  | -0,0507 | VAITLTWSQLYRRTL | -0,2826 |
| FGMSGTNVHAIVEEA  | -0,051  | PELDVVGEAGSVAEA | -0,2832 |
| GQMGARAGGGLSGVL  | -0,0513 | YAGLTAANTKKVAMA | -0,2845 |
| EDKILVQANEAEETT  | -0,0514 | RVAGAYKAPAETQAA | -0,286  |
| AGAGEGSAITDADFK  | -0,0516 | GLREVADGDALYDAA | -0,2876 |
| YAGLTAANTKKVAMA  | -0,0519 | VGGGNVGFNGIDAN  | -0,2884 |
| LVLSADNMREYLAAG  | -0,052  | KHRIEDAVRNAKAAV | -0,2896 |
| DRAAQIAGADAKLII  | -0,0521 | VPDNLAELGRLTQLP | -0,2901 |
| PAAEIVKDGDDAVVR  | -0,0525 | HFRDNSWSVKVPRRL | -0,2918 |
| PLPATGRGLRAAAEA  | -0,0526 | VDMANPMPSPVKSFE | -0,2918 |
| PDSDMTTAVMRPSKT  | -0,053  | STNNDDPAGACRPF  | -0,2929 |
| TVIGARDDLMMVNNAG | -0,0536 | QEITRGCAAISVPG  | -0,2944 |
| FGSGVSGLYNTGGLP  | -0,0541 | LDPSQGMGPSLIGLA | -0,2945 |
| TQYLSKQDPEGWGKS  | -0,0542 | NSGSFNTGIGNGGTG | -0,295  |
| PISVIFRSDKSGTSD  | -0,0545 | AKERAHNAGAKNVEE | -0,2951 |
| GASVTVGPIINGVN   | -0,0547 | AGVTCVGEHETLTAA | -0,2957 |
| VTSALSSSHGLSVAD  | -0,0548 | VLASGLVAVSWAVG  | -0,296  |
| REPIVISNVPRLVPG  | -0,0552 | IQMSDPAYNINISLP | -0,2967 |
| LVAGVPVIGVAGNLD  | -0,0554 | AESNNQVVLPFDTIT | -0,2971 |
| INTGWFTGNANTGI   | -0,0562 | NDDPAGACRPFDRDR | -0,2979 |
| MKFARSGAAVSLAA   | -0,0564 | DAMARLGAIKREVTS | -0,2991 |
| GALLRYAATNRLGSH  | -0,0566 | DGVGALLRYAATNRL | -0,3007 |
| GLTVPPPVAENRAE   | -0,0566 | ILELGTSAKMLSVVP | -0,3017 |
| TPANQAISMIDGPAP  | -0,0569 | ARGANILARIMGASI | -0,3019 |
| SLIGLAMGDAGGYKA  | -0,0569 | LLPFEEAPEMTSAGG | -0,3026 |
| VSVDIPAVTITGTRI  | -0,0571 | NGDEVQIGKFRVLFL | -0,3037 |
| PGIGNTTVPSSGFF   | -0,0574 | VTLGPKGRNVVLEKK | -0,3043 |
| GTAVKAFLQSTIGAG  | -0,0575 | EIVCSKYPDATTGTA | -0,3047 |
| KIRAWGRRLMIGTAA  | -0,0578 | DKRDTVGVRIKRR   | -0,3069 |
| TGPGSVAGMAQDPVA  | -0,0587 | LVVGNGGPGVTALVM | -0,3075 |
| LEDPYEKIGAELVKE  | -0,0592 | IAGAKIMGQGNLVL  | -0,3077 |
| ELKGTDTGQACQIQM  | -0,0594 | GQPVLAIQSPGLLEG | -0,308  |
| HAVFNAASQAFNTPA  | -0,0594 | TPDAAPGLAARRRRI | -0,309  |
| GNVDTGALMSGNFSN  | -0,0595 | FGSGVSGLYNTGGLP | -0,3102 |
| TAPFTTVVGADPTSDI | -0,0598 | RVQGVSGLTPISLGS | -0,3104 |
| HACVAASAQGMLSST  | -0,0599 | PANAFVADYLPGEAA | -0,3125 |
| QQALVAGVPVIGVAG  | -0,0604 | IGKLLDNDKSPSRKT | -0,3138 |
| DSGTTISAIYETVQTA | -0,061  | RAVDRAAQIAGADAK | -0,3151 |
| GLLPPEVNSSRMYSG  | -0,0611 | LAQIKAGDKVLIHSA | -0,3154 |
| AGNLGLFNSGTGNIG  | -0,0613 | DEDDIKATYDKGILT | -0,3169 |
| MRVQVRRPGDLQTL   | -0,0615 | GTGSTGLFNAGNFNT | -0,319  |
| NNGNGARVQRVVGS   | -0,0618 | RGGPGGAPGCWQPIT | -0,3194 |
| LGSSSDLRVGPVLA   | -0,0619 | ADFPALPLDPSAMVA | -0,3205 |
| VRAMSSLGSSLGSSG  | -0,0622 | PDTAKEKPQEGTVVA | -0,3206 |
| VTVGPIINGVNIPA   | -0,0623 | AMFGYAAATATATAT | -0,3213 |
| ATVSPAMVAANRTRL  | -0,0625 | RAPKAVKEYARKHPH | -0,3235 |
| LSSMLKGFAPAAAAQ  | -0,0626 | DNQTGIGGLNSGAGN | -0,3239 |
| GGLNSTGNLGLFNS   | -0,063  | GKLDKTKAVNPESTF | -0,3249 |
| ALVREGLRNVAAGAN  | -0,0632 | VFAPTNAAFDKLPAA | -0,3254 |
| RVTVPVAVIGMGCRLP | -0,0634 | GLERHAKAGVMTPTS | -0,3261 |
| APPLAVANLAGALP   | -0,0635 | HACVAASAQGMLSST | -0,3263 |
| TPDAAPGLAARRRRI  | -0,0638 | GTAVKAFLQSTIGAG | -0,3267 |
| IGNIGDRNLGIGNTG  | -0,0639 | DRARNVRMELLAKSG | -0,3275 |
| FSIIPTLNVAVLP    | -0,0642 | EIVCSKYPDSQVGTA | -0,3291 |
| GLNTPLAVAVDSRT   | -0,0644 | HGTVLLAVRGLRMGT | -0,3303 |
| VFRARMQREADTAGR  | -0,0645 | YGSFRRSFRLPAHVT | -0,3321 |

|                  |         |                  |         |
|------------------|---------|------------------|---------|
| TATLLPFEEAPEMTS  | -0,0648 | NMQRQAVPLVRSEAP  | -0,333  |
| TPADGSAPIVHEMVS  | -0,0652 | AFGRFPIIDDRPQL   | -0,3332 |
| TSGKVRRGACVEQYR  | -0,0654 | SGIPTLSTTGPVHAV  | -0,3342 |
| RPGRVPPALDQVIAK  | -0,0658 | MLSSTSSDALRQTAR  | -0,3346 |
| AVQTAAQNGVRAMSS  | -0,0658 | GAAEKQDPLSGLTDQ  | -0,3346 |
| MPVLSKTVETADAA   | -0,0658 | SDQDAMARLGAIKRE  | -0,3356 |
| EFPAIPGFPALPGLP  | -0,066  | RRCRRALRQIGVLER  | -0,3356 |
| QNQALLNARDELQAAQ | -0,0661 | NISVPDSSVPIIIVP  | -0,3363 |
| VNINTKLGYNNAVGA  | -0,0661 | AGSNNQTVLPFDGLN  | -0,3371 |
| RVQAATIKRFADRFA  | -0,0661 | VKKPETINYRTLKPE  | -0,3372 |
| WYVARLTPSPLGHEE  | -0,0676 | VGAPVDALVNLADEE  | -0,3402 |
| GFTLSGATPADAYPT  | -0,0676 | AGSPEFQRHRDKIVQ  | -0,3402 |
| SSSAGADPTALNGMP  | -0,0687 | LTSAAERGPGQMLGG  | -0,3406 |
| LDQASQRGLGEAQLG  | -0,0689 | NNQTVLPFDGLNYPE  | -0,3412 |
| GKSPGFGTTVDFPAV  | -0,069  | GLGDKFGESIVNANT  | -0,3422 |
| GAAASLVGFNRAPAG  | -0,069  | CAPVFVMAAPGQPLP  | -0,343  |
| RLAKSLARLRDQLE   | -0,0691 | LPNISASVPQLVAAI  | -0,3431 |
| AGSPEFQRHRDKIVQ  | -0,0692 | SMTNSGVSMNTLSS   | -0,3433 |
| KHLESRAKQELIDS   | -0,0693 | AAIDAATSSSQESGV  | -0,3433 |
| VIGAGKPLIIAEDV   | -0,0694 | GGVVTALVMGGTDSL  | -0,3438 |
| PILHRRRREFKARAA  | -0,0696 | GGLNSGTGNLGLFNS  | -0,345  |
| MGATVTVLDINIDKL  | -0,0698 | GAYHLMRTQGGRGVL  | -0,3453 |
| QRHRDKIVQRCLPLA  | -0,0701 | QSESGIAGAGTGPPT  | -0,3465 |
| VGAQNLGAAANAGSGN | -0,0703 | TLPVPVLRDELPGLG  | -0,3469 |
| PLSGLTHKRRLSALG  | -0,0706 | ATLAHVVRPFVLARS  | -0,3473 |
| ELTSAAVSYGSVVST  | -0,0708 | GITGNGQIGFGKPAN  | -0,3475 |
| AGSNNQTVLPFDGLN  | -0,0708 | HVSRLAKSLARLRD   | -0,3482 |
| GVPVIGVAGNLDQHL  | -0,0709 | VPVLRDELPGLGPLP  | -0,3485 |
| EAYPPEVNSANIYAG  | -0,0713 | VARAQGMSQDMAQTF  | -0,3487 |
| GPKVVIDGKDQNVTG  | -0,0715 | SRPQSSNNSVPGAP   | -0,351  |
| IRGTFKSVAVKAPGF  | -0,0716 | AITRVVVRDQPARQL  | -0,3512 |
| GIMDEERRTTVNLKA  | -0,072  | MSAYKTVVVGTDGSD  | -0,3516 |
| QNPTGPGSVAGMAQD  | -0,0721 | MADVASGNLPALPDM  | -0,3516 |
| QVGPPQVNVINTKLG  | -0,0723 | GEAQLGNSSGNFLLP  | -0,3522 |
| DGKDQNVTVGSVVCCT | -0,0724 | GQRCAPVFVMAAPGQ  | -0,3529 |
| DLARVGRYKVNKKLG  | -0,0725 | EGYPKRARMMLMDAAI | -0,3534 |
| AADPEVVVFVSGEVRS | -0,0728 | GRGCAQYAAQNPTGP  | -0,3536 |
| PVTVIAATAGRSDLK  | -0,0729 | TKDGSHYKITGTATG  | -0,3546 |
| VAAELTSAAVSYGSV  | -0,0732 | CAQYAAQNPTGPGSV  | -0,3556 |
| HFRDNSWSVKVPRRL  | -0,0736 | TFESITSRMAEINGM  | -0,3557 |
| IVGLERLYAENPSAR  | -0,0738 | DYMDVSPRQMVSVAT  | -0,3584 |
| GTTGGGGTRSGTSTD  | -0,0738 | SALLDPSQGMGPSLI  | -0,3587 |
| AYTLARGRRHRPVRT  | -0,074  | DKPEKEKASVPGGGD  | -0,3599 |
| QSESGIAGAGTGPPT  | -0,074  | LFNVGGFNTGVANVG  | -0,361  |
| TGIGGLNSGTGNLGL  | -0,0741 | TSVAGDPPDAGTST   | -0,3611 |
| YPADPKTDQEKAIKE  | -0,0742 | VSGLGLKEAKDLVDG  | -0,3616 |
| PNGYTEPILHRRRRE  | -0,0745 | AAIANRLLRRTATHL  | -0,3627 |
| KLNPDVNLVDTLNGG  | -0,0748 | DIMVRDQQLTIKAER  | -0,363  |
| AGVQYSRADEEQQQA  | -0,0751 | EKEKASVPGGGDMGG  | -0,3632 |
| TAPTQGILIHTGPSS  | -0,0751 | HLMRTQGGRGVLMMGG | -0,3637 |
| TVTVDINIDKLRLQ   | -0,0753 | TIKAERTEQKDFDGR  | -0,3668 |
| PAVFAVQVALAATME  | -0,0754 | GLILTNNHVIAAAAK  | -0,3683 |
| FKEMTLLELSDFVKK  | -0,0755 | VASPPQSTVIGGTSDT | -0,3692 |
| NQNTVLDAIQTDAAI  | -0,0758 | AFELAARRTTDDDMA  | -0,3695 |
| AGLMRHTIGQAEQAA  | -0,076  | KTDDVAGDGTTTATV  | -0,3696 |
| NAGSYNTGSFNVGDT  | -0,0762 | WNQAQTEVAGAGSGF  | -0,3697 |
| GNAGTASTGLFNVGG  | -0,0764 | TQVLVPRSAIDSMILA | -0,3701 |
| RAVDRAAQIAGADAK  | -0,0765 | YRTDLADRVDTLVGA  | -0,3702 |
| ELAIPMSGIAMAVVG  | -0,0766 | FSVSGGQTYGVDDVVG | -0,3703 |
| LGSELTMTDTVGQVV  | -0,0768 | NSEEFLLDAIADNLEK | -0,3705 |
| SNGAWGKGAGKSFQGG | -0,0768 | TIFPNGISIPNNPLA  | -0,371  |
| GTDGTGQACQIQMSDP | -0,0769 | VITSADVRASLERMA  | -0,3711 |
| YPITGKLGSELTMTD  | -0,0771 | CQGDLMGSHQDWQAQ  | -0,3722 |
| LKASDVNGPLINSRT  | -0,0775 | AATQAAGAGAVADAQ  | -0,3742 |
| ISFLDQASQRGLGEA  | -0,0775 | NQNTVLDAIQTDAAI  | -0,3742 |
| GAAHQGGGAKSKGS   | -0,0786 | GGQFTLPGRSLMFVR  | -0,3753 |

|                  |         |                  |         |
|------------------|---------|------------------|---------|
| DVVVLLESMKMEIPV  | -0,0786 | VRAMSSLGSSLGSSG  | -0,3755 |
| GNWPSQTGHSPAVPN  | -0,0786 | VKRADLVIGAVLVPG  | -0,3756 |
| EIVCSKYPDATTGTA  | -0,0792 | LTSLTSAAERGPGQM  | -0,3758 |
| QNLARTISEAGQAMA  | -0,0795 | ARLFIDDDGQEQRQAQ | -0,3761 |
| MGVPPLAGASRTDME  | -0,08   | LVLSADNMREYLAAG  | -0,3771 |
| VSQLHAGPRKSALDE  | -0,0801 | SDGSGVTPGTGMPAA  | -0,3773 |
| SEAIAASYDAGVLTV  | -0,0804 | VGSWIGSSAGLMVAA  | -0,3778 |
| QVVKLLAGSTTSTVL  | -0,0805 | NVTGGGATTGQASAK  | -0,3783 |
| AAKAGLMRHTIGQAE  | -0,0805 | VLSWLSDHQVHNVA   | -0,3791 |
| PTFSSSAGADPTALN  | -0,0806 | LTVRVAGAYKAPAET  | -0,3802 |
| ALSGQLNPQVNLVDT  | -0,0806 | PAFSPPAQALGGVG   | -0,3814 |
| GSVAEAMARVPAARP  | -0,0811 | AQDPVATAASNNPML  | -0,3817 |
| SLAAIAIAFLAGCSS  | -0,0813 | KERKHRIEDAVRNAK  | -0,3834 |
| AAPRSVGVPLYLLLG  | -0,0821 | FGGRFVEIGKADVYG  | -0,3836 |
| TIFPNGISIPNNPLA  | -0,0825 | GAHQGGGAKSKGS    | -0,3839 |
| GTVTRHYRQYQAGKP  | -0,0826 | RLAKSLARLRDQLE   | -0,3839 |
| FMQAAIGPGQEGLDQ  | -0,0827 | GQMGARAGGGLSGVL  | -0,3848 |
| RGAHIRSVTLSEVQQ  | -0,0827 | PGVDPDKDVIDIMVRD | -0,3849 |
| DPDKDVIDIMVRDGQL | -0,0828 | IVGLERLYAENPSAR  | -0,3855 |
| VTLGAAFGGLTTAHT  | -0,0833 | TLARVAAFIGEHEPS  | -0,3857 |
| VARAQGMSQDMAQTF  | -0,0835 | MAEMKTDATLAQEA   | -0,3866 |
| TTIVEGAGDTDAIAG  | -0,0836 | VGAGERKMSALVDAS  | -0,3869 |
| TTGSGETTTAAGTTA  | -0,0838 | QNAQALLNARDELQAQ | -0,3869 |
| GEHEPSDLVYGDVIM  | -0,084  | DPDKDVIDIMVRDGQL | -0,3876 |
| DDRPINSADALVA    | -0,0845 | GNAGTASTGLFNVGG  | -0,3881 |
| TAVVPLHRSDBGSGDT | -0,0855 | QALNSGTDLPPTPIS  | -0,3883 |
| VDPVKLNLTLASAAE  | -0,0858 | QSGLSIVMPVGGQSS  | -0,3888 |
| HGLHIEILIDPESQV  | -0,0859 | SGMTSQAATFAANRL  | -0,3899 |
| YPEGLAVDTQGA     | -0,0868 | AYTLARGRRHRPVRT  | -0,3911 |
| YVAQKRKISDGDKLA  | -0,0874 | GNPNRPDGGILTRFG  | -0,3928 |
| VNAIRGSVTPAVSQF  | -0,0876 | QNAASIAGLFLTTEA  | -0,3929 |
| HLMRTQGGRGVLMGG  | -0,0876 | LAQPTQGTTPSSKLG  | -0,3929 |
| NGNQTDFFGSDVPLS  | -0,0876 | AALPAFSPPAQALGG  | -0,3929 |
| MTSAGGELLEQAAVE  | -0,0877 | QGELSKQTGQQV     | -0,393  |
| QRRKIDRLLDVAGVQ  | -0,0883 | ASLVGFNRAPAGPSG  | -0,3932 |
| GLRMGTGTSEDERD   | -0,0883 | PGEPTKESAQTLLE   | -0,3938 |
| LLRTERLKSQRVAGA  | -0,0883 | ARLGAIKREVTSALS  | -0,395  |
| FAWTRGLQHRGKLDG  | -0,089  | AYAIAKHG         | -0,3952 |
| DPNGVVLTNHVIAG   | -0,0895 | AVQTAQNGVVRAMSS  | -0,3961 |
| AFELAARRTTDDDMA  | -0,0899 | FMQAAIGPGQEGLDQ  | -0,3961 |
| PGVDPDKDVIDIMVRD | -0,09   | KVNTLLDVAQANLGE  | -0,3967 |
| CLFSSGAALLGSPGQ  | -0,0901 | RRSPWGEMFASTGQR  | -0,3983 |
| TAALAKETATQARAA  | -0,0902 | RQRPRAGMLAIGAVT  | -0,3991 |
| YCEELKGTDTGQACQ  | -0,0907 | EFEGELPRLFVVTRQ  | -0,3995 |
| TLGYTSGTGQGNASA  | -0,0909 | AAHDALTTSEQHQAT  | -0,4    |
| VGNGYWQKPDESERT  | -0,091  | LTNNHVIAGATDINA  | -0,4002 |
| LTNNHVIAGATDINA  | -0,0911 | ASQRGLGEAQLGNSS  | -0,4006 |
| VYVADRGNNRVVKLA  | -0,0914 | ARGTHQASGLGDVGE  | -0,4011 |
| QPRAGASTAWVPSPT  | -0,0917 | FVVTRQAQIVKPHDS  | -0,4015 |
| PGGVEVPVETDDIDH  | -0,0917 | PKTQLTMLSARAGLV  | -0,4016 |
| GIRLTPKVIATNKTA  | -0,0917 | FEATLAATVSPAMVA  | -0,4029 |
| GGAAPVSAGVGHAA   | -0,0923 | GSDVPLNPSTGQPDR  | -0,4033 |
| AFVDSLTSQVGGRSI  | -0,0925 | LRHGQILFTFLHLAA  | -0,4041 |
| RLAGWQERYPNVAIT  | -0,0928 | SDLAYTLARGRRHRP  | -0,4047 |
| GIMDALFTGLIAIHG  | -0,093  | AMSNLLGQNAAAIAA  | -0,4047 |
| VTGKARTTVARDADM  | -0,093  | HWAITDGNKASFLDQ  | -0,4053 |
| PNAGSRFLDQAITS   | -0,0932 | RLAGWQERYPNVAIT  | -0,4056 |
| EAVIGNRRRQDSKES  | -0,0934 | TRFVNVFEQACPGQT  | -0,4071 |
| EAAEEQSEFDVILEA  | -0,0935 | AGMAQDPVATAASNN  | -0,4075 |
| LPDFLGGFAGLPSLG  | -0,0948 | HLVEGVARVLT      | -0,408  |
| NDDNVTGGGATTGQA  | -0,0948 | LMDAWAGPVVMQLME  | -0,4089 |
| TPGCVAYIGISFLDQ  | -0,0954 | DGTRTWRTGRQATTL  | -0,4092 |
| PTQGHPLSSATDEPE  | -0,0955 | TIDAIELPAISFSQS  | -0,4096 |
| AEAYLNQNIQAQLRA  | -0,0956 | HPMLRTTLIDVDEHT  | -0,4098 |
| TMPHHRMLATRHTQT  | -0,0959 | SEEGSGIILSAEGLI  | -0,4103 |
| LIARWEQRDVMAREV  | -0,0959 | KDQTSDEVTVETTSV  | -0,4105 |

|                    |         |                  |         |
|--------------------|---------|------------------|---------|
| AIDQGGCFEGSRPTT    | -0,096  | AEAERAPIDAGTAAS  | -0,412  |
| MGTVPNVGLMAQQAE    | -0,0961 | FGMSGTNVHAIVEEA  | -0,4128 |
| GLNYPEGLAVDTQGA    | -0,0962 | NALGGNRPAVYAPKS  | -0,4131 |
| VPLNPSTGQPDRSAE    | -0,0964 | GVAVDSAGNVYVTSE  | -0,4132 |
| NSEEFDAIADNLEK     | -0,0965 | SSSAGADPTALNGMP  | -0,4136 |
| AGDTDAIAGRVAQIR    | -0,0966 | LSTDELLDAFKEMTL  | -0,4162 |
| TRGRCAAISVPGDRR    | -0,0967 | AVDGAGTVYVTDENN  | -0,4172 |
| QPATTVALGRSVCPM    | -0,0968 | GGCAVLLEPHACVAA  | -0,4173 |
| LENNEFNVVDVGS LN   | -0,0971 | DQQEILNRANEVEAP  | -0,4176 |
| LVSGAGNVGQQLSGV    | -0,0972 | QGYGSLGLMTSVLMT  | -0,4186 |
| DRARNVRMELLAKSG    | -0,0974 | GSKPPSGSPETGAGA  | -0,419  |
| VVRGTATNQDGR TET   | -0,0975 | RSTLEKDNTVGTDEA  | -0,4191 |
| GQLNPQVNLVDTLNS    | -0,0981 | KAVEKVTETLLKGAK  | -0,4193 |
| ISGATIPQGEQSTGK    | -0,0983 | GNVDTGALMSGNFSN  | -0,4194 |
| ALAVAVSPAAAAGDL    | -0,0993 | VEERPIVGAPVDALV  | -0,4204 |
| NSGVSMNTLSSMLK     | -0,1    | MDYEQDWDGVAITLT  | -0,4214 |
| DKRDTVGVRIDRKRR    | -0,1002 | KSLENYIAQTRDKFL  | -0,4215 |
| MSNAPKIKVSGPVVE    | -0,1002 | IGVLERPVGDSSDCG  | -0,4217 |
| AQVGAYHLMRTQGG R   | -0,1004 | AGADPTALNGMPAGL  | -0,4218 |
| SVAVKAPGFGDRRKA    | -0,1005 | AEAMARVPAARPDVA  | -0,4224 |
| KGSQGEDEALYTEDR    | -0,1006 | VGPGECAEYAAANPTG | -0,4226 |
| QLAEHFASLADVLTK    | -0,1006 | SVAVKAPGFGDRRKA  | -0,4245 |
| TLDYNANGSGAGVTQ    | -0,1011 | ALPGIVGGAPNPYTY  | -0,4255 |
| GTTDRAGVKDVILES    | -0,1011 | NAGSYNTGSFNVGDT  | -0,4277 |
| KQKQELDEISTNIRQ    | -0,1015 | LGSELTMTDTVGQVV  | -0,4284 |
| PVAITTESVGKTIAG    | -0,1015 | PGALGENGNNGMVTG  | -0,4285 |
| TTGEAGNQNTVLDAI    | -0,1016 | TPANQAISMIDGPAP  | -0,4286 |
| SGIPTLSTTGPHAV     | -0,1038 | GNWPSQTGHSPAVPN  | -0,4293 |
| QVTNDKDTLGAKIVE    | -0,104  | PVTVIAATAGRSCLK  | -0,4299 |
| AMAAQLQAVPGAAQY    | -0,1044 | MTVPGGVEVPVETDD  | -0,4302 |
| KDEAAAAQRRCGSPA    | -0,1046 | AADILKDESYKVTGT  | -0,4322 |
| LEGTYRLAPKSGSTE    | -0,1047 | PALDQVIAKGMAKNP  | -0,4329 |
| IPALNPNVTGSGVFG    | -0,1048 | VVPSVVMLETDLGRQ  | -0,4336 |
| RKIPLTLVHAVSPEV    | -0,105  | KVPRRLKELHLRLGT  | -0,4344 |
| LYGNAGGLGPTQGH P   | -0,1055 | MGTVPNVGLMAQQAE  | -0,4348 |
| EQGLIPGFLMPPSDG    | -0,106  | QLVAAGGGPSQLASM  | -0,4355 |
| VGEQLSGLSSAGTAL    | -0,1067 | DAFPNEFPDPTISVQ  | -0,4361 |
| MSSLGSSLGSSGLGG    | -0,1073 | NANIGFGNRGDANIG  | -0,4391 |
| RRTTVNLKACIKAAA    | -0,1075 | EHTDVERVAQQLLSG  | -0,4406 |
| KVNTLLDVAQANLGE    | -0,1077 | GAGSGFANFGSLGSG  | -0,4408 |
| ITTTAGPQLVVPVLN    | -0,1077 | VPLNPSTGQPDRSAE  | -0,4411 |
| EPVDSAVLANGDEVQ    | -0,1078 | YRATNFKVDQPGTVT  | -0,4422 |
| AQTDDQQLAEHFASL    | -0,1079 | QNIAQQLRAQVMGDL  | -0,4424 |
| LVAGLIAPLAVAN      | -0,1086 | DVVSVVVASPQSTVI  | -0,4427 |
| LSVEQQRLARQVAA     | -0,1086 | PVDALVNLADEEKAD  | -0,4427 |
| SFRLPAHVTSEAIAA    | -0,1088 | GWRAACRSNPALAKG  | -0,4427 |
| ATVDPAAVAVNRMAM    | -0,109  | VAPVSPSTASSRTDT  | -0,4435 |
| PVISEHRLVGIVTEA    | -0,1092 | DLVYGDVIMRSTNFR  | -0,4442 |
| DDLMMVNNAGLVC GG V | -0,1096 | DLQTLFVASDRVPP   | -0,4446 |
| TKRRITPKDVIDVRS    | -0,1097 | AVGEPVVAMGNSGGQ  | -0,4475 |
| EAETTTASGLVIPDT    | -0,1105 | DDRPINSADALVAAV  | -0,4479 |
| GVNLPGTAVVPLHRS    | -0,1105 | TSVLMTADGKTVEAE  | -0,4482 |
| INAFSVGSGQTYGVD    | -0,1106 | DGSAPIVHEMVSIP E | -0,4494 |
| RVQGVSGLTPISLGS    | -0,111  | ARIFAGAGLGPM LAA | -0,4495 |
| NTGNWNIGIGITGNG    | -0,1115 | EVLLKIAQGRLFYNT  | -0,4504 |
| VVAGEPRPGNYRYAI    | -0,1117 | AVVLPGLVGLAGGAA  | -0,4519 |
| NSGLEPGVVAEKVRN    | -0,1123 | PMLSTLTSALSGKLN  | -0,4531 |
| ILTVSAVSEGKPT E    | -0,1125 | QNPTGPGSVAGMAQD  | -0,4534 |
| RFNLQERVIRPSYGL    | -0,1129 | NTAASDNFQLSQGGQ  | -0,4534 |
| VSGIGNVGEQLSGLS    | -0,1132 | APKIKVSGPVVELDG  | -0,4564 |
| VGADEDDIKATYDKG    | -0,1138 | RTVSLPVGAEDEDIK  | -0,4573 |
| IPETDGAEEKPTYNK    | -0,1138 | LKRGIEKAVEKVTET  | -0,4576 |
| LAKLAGGVAVIKAGA    | -0,115  | VKAFLQSTIGAGQSG  | -0,4576 |
| DGQIDGFSTPPITID    | -0,1156 | GDTNTGGFNPGSTNT  | -0,4583 |
| DGALPLLAPMSEVAG    | -0,1158 | RPIVGAPVDALVNLA  | -0,4597 |
| QPVVLAATGDLPTI     | -0,1159 | TGVANSNGNVDTGALM | -0,4597 |

|                  |         |                  |         |
|------------------|---------|------------------|---------|
| NRAAAALMAKLRGAA  | -0,116  | AQQLRAQVMGDLDKL  | -0,4607 |
| GPYLQRGVADLVPTA  | -0,116  | GALLRYAATNRLGSH  | -0,4609 |
| IAGAKIMGQGNLVL   | -0,1161 | LALLAGVFGGAASCA  | -0,4611 |
| PDKSTGLANPGQFAG  | -0,1161 | VTIPTITTSPIPLKI  | -0,4619 |
| FEAALAATVDPAAVA  | -0,1161 | PAIKIDPPPPPEQEQ  | -0,4627 |
| DVVVSVVASPQSTVI  | -0,1165 | DKLPAATIDQLKTD   | -0,4637 |
| GLAAGLDPNTATAGE  | -0,1166 | SRQSKTAASPSPSRP  | -0,465  |
| VVVNEGQIDKGDVV   | -0,1167 | TGIGGLNSGTGNLGL  | -0,4684 |
| LSGAQQPNGYTEPIL  | -0,1169 | AGDTDAIAGRVAQIR  | -0,4698 |
| TVLPFTGLNTPLAVA  | -0,117  | VTYELAVDLAVPMIG  | -0,4699 |
| QATPTFSSSAGADPT  | -0,117  | AATALDNDGEGTVQA  | -0,4701 |
| AVDVASHSPQVDPIL  | -0,1171 | WTHARLFIDDDGQEQ  | -0,4713 |
| QLMNNVPQALQQLAQ  | -0,1176 | DALRIVMADSRPLTN  | -0,4722 |
| AAPSIPAANMPPGSV  | -0,1176 | LRALLKQYGPLTPAR  | -0,4731 |
| LVYSDGTATGAADPR  | -0,1176 | ASNNPELTTLTAALS  | -0,4744 |
| DLQTLFVASDRVPP   | -0,1178 | DAKQELIDSLEEAVR  | -0,4751 |
| AGVNYGDPVDAKALG  | -0,1179 | EQRVPDNLAEELGRLT | -0,4767 |
| LNRPVSTTGEAGNQN  | -0,1181 | IAFNSGLEPGVVAEK  | -0,4808 |
| IAFNSGLEPGVVAEK  | -0,1182 | DLAAAVDKDGTAFRL  | -0,4819 |
| GTRTGNVTLAEGPPA  | -0,1186 | PQNAIPLTIDASGVL  | -0,4835 |
| VKRADLVIGAVLVPG  | -0,1188 | RSNHGTCANQCPIVD  | -0,4842 |
| AIAIAFLAGCSSTKP  | -0,1189 | GLSDLYSKIESLPAS  | -0,4859 |
| VHEMVSIPEDGGVVL  | -0,1189 | ATVDPAAVAVNRMAM  | -0,4862 |
| QTGGQVSIAPNAGLD  | -0,1191 | RLNTEGVAAAVKQVL  | -0,4882 |
| TSYTSDEAMLDAILA  | -0,1192 | QATPTFSSSAGADPT  | -0,4928 |
| CERLVRGLDTIAATG  | -0,1193 | TGVLPPAANDVSVLT  | -0,4945 |
| PELVPTYNLNANHRY  | -0,1193 | LLSFASLPTVGQVTA  | -0,4965 |
| AGSLASGVLNSGVDI  | -0,1195 | GEVDEEAATALDNDG  | -0,4976 |
| QMLLLDEQTPIDAVA  | -0,1204 | IDTSNAVDTPDMLAS  | -0,4978 |
| LQSLGAIEAVEQAAL  | -0,1214 | MLSARAGLVMDPGSK  | -0,4989 |
| YRTDLADRVDTLVGA  | -0,1214 | GNPLADLIQPDRLVL  | -0,5    |
| DIDHVNHAHTGTQVG  | -0,1215 | GIPDPGDIFNTGSSL  | -0,5011 |
| GFNDTTAPSSGFFN   | -0,1216 | VLAIGSPLGLEGTVT  | -0,503  |
| TTTAAGTTASPGAAS  | -0,122  | DLADRVDTLVGAGER  | -0,5044 |
| RNFLAAPPPQRAAMA  | -0,1221 | GKSFQGGVGEARGN   | -0,5121 |
| VPGEVADVVVIGAG   | -0,1221 | PIAHSTVLVAPVSPS  | -0,5184 |
| HEGQTTMTVPGGVEV  | -0,1227 | NATNLRGILGRLEIM  | -0,5236 |
| AYAIAKHGVBVKCAT  | -0,1238 | ILSGSERVQAATIKR  | -0,5412 |
| VSEHLKLNKVLAAAM  | -0,1238 | VVIDRIPVELHASTT  | -0,5428 |
| IEEHEIDARDTKLGA  | -0,1238 | GFTIPGGTLIPQLPL  | -0,5441 |
| DFTPAAEIVKDGDDA  | -0,1239 | NKGDLAADVCKDGT   | -0,5484 |
| TNDIAVDTDGSEVFE  | -0,125  | AARALPLTSLTSAE   | -0,5494 |
| TGVLPPAANDVSVLT  | -0,1259 | QSIGDLIAEAMDKVG  | -0,5737 |
| GRSLLDNRAAAALMA  | -0,1259 | AEINGMSRDMASTFT  | -0,5843 |
| MTVETSQTPSAIDS   | -0,1274 | VGEQLSGLSSAGTAL  | -0,5899 |
| PILDDLAAALADIAP  | -0,1276 | VEIDLCDYRDVDGQY  | -0,5976 |
| EEAPAEASAPESSPG  | -0,1276 | QLVVALPDKSTGLAN  | -0,6021 |
| NDDPAGACRPFDNRD  | -0,1277 | ADHLTRLVDAADPEV  | -0,6202 |
| SALLQTTDGSITYNE  | -0,128  | DVRAEIVASVLEVVV  | -0,6216 |
| PALDQVIAKGMAKNP  | -0,1282 | PLLEKVAKEAADEAK  | -0,6468 |
| IAQTRDKFLSAATSS  | -0,1288 | RAELMILIATNLLGQ  | -0,6511 |
| GHGNVGFNGSGLGAA  | -0,129  | LDELKLEGDEATGAN  | -0,6551 |
| MSAYKTVVVGTDGSD  | -0,1291 | TIDQLKTDAKLLSSI  | -0,6871 |
| GCAEYAAAANPTGPAS | -0,1298 | NLAELGRLTQLPDTN  | -0,6927 |
| AENRAELMILIATNL  | -0,1299 | NVLEHLAENLKQRAE  | -0,7053 |
| CQGD LGMSHQDWQAQ | -0,1303 | LAVAANLAGALPGIV  | -0,7506 |
| AGSWLLIDTSNAVDT  | -0,1305 | LPSLPDIIDGLWPPK  | -0,7516 |
| ENSDDSYDREKLQER  | -0,1313 | VASHSPQVDPILDDL  | -0,8035 |
| LLPFEEAPEMTSAGG  | -0,1314 | LIDGALKDLKKRVEG  | -0,8127 |
| EEITRDIPNISDEVL  | -0,1319 | TVELIEDLARRAVQT  | -0,8261 |
| QYSRADEEQQALSS   | -0,1319 | VPFMFRELVLPGAS   | -0,8474 |
| SNVGQNPITIVNIGL  | -0,1324 | LENADLSLLGKARKV  | -0,8481 |
| QLTMLSARAGLVMDP  | -0,1333 | GYGVDIVLNSLTGAA  | -0,8482 |
| VLDINIDKLRLQDAE  | -0,1347 | DAAIGKLLDNDKSPS  | -0,8638 |
| DAKALGQSVCPILAE  | -0,1348 | LQQTIDAIELPAISF  | -0,8819 |
| QIAAALDAAHANGVT  | -0,1349 | GPYQLRLLLGRGGMG  | -0,9103 |

|                  |  |         |                 |  |         |
|------------------|--|---------|-----------------|--|---------|
| DALRIVMADSRPLTN  |  | -0,1361 | VGLSTIAGRLLGSVP |  | -0,9129 |
| PLGLEGTVTTGIVSA  |  | -0,1365 | ATVALTFQDPSSGGS |  | -0,9209 |
| LTGDNQTGIGGLNSG  |  | -0,1366 | AGKPLLIIEEDVEGE |  | -0,9913 |
| QGELSKQTGQQVSIA  |  | -0,137  | GILGRLEMLTTLPK  |  | -1,1355 |
| SGVDAEITTTAGPQL  |  | -0,1382 | LPPAANDVSVLTAAR |  | -1,1472 |
| SAPAGGRAAHADPCS  |  | -0,1383 | MLKRKAERRLIDGAL |  | -0,1864 |
| PDTAKEKPQEGTVVA  |  | -0,1386 | LGGANIPAEFLENFV |  | -0,4329 |
| PQGGVTDERSDSVLS  |  | -0,1387 |                 |  |         |
| VRDGQLTIKAERTEQ  |  | -0,1391 |                 |  |         |
| SAGTVGLIKAILSLR  |  | -0,1393 |                 |  |         |
| IVDSBTCIECPDGT   |  | -0,1396 |                 |  |         |
| PKTQLTMLSARAGLV  |  | -0,1397 |                 |  |         |
| HIGLYGNAGGLGPTQ  |  | -0,1398 |                 |  |         |
| TTVALGRSVCPMVVA  |  | -0,14   |                 |  |         |
| LQLRGAGGLPSAAIG  |  | -0,1405 |                 |  |         |
| THQASGLGDVGEAFV  |  | -0,1406 |                 |  |         |
| NEVEAPMADPPTDVP  |  | -0,1411 |                 |  |         |
| ADFPALPLDPSAMVA  |  | -0,1412 |                 |  |         |
| TWKLLLDQRSGIRTL  |  | -0,1414 |                 |  |         |
| PTITNDGVSLAKEIE  |  | -0,1414 |                 |  |         |
| GAYHLMRTQGGRGVL  |  | -0,1419 |                 |  |         |
| HWAITDGNKASFLDQ  |  | -0,1422 |                 |  |         |
| GIVGGAPNPYTYPEN  |  | -0,1424 |                 |  |         |
| SERTAPSRACQGD LG |  | -0,1425 |                 |  |         |
| NLADEEKADLLVVG   |  | -0,1433 |                 |  |         |
| HLIPANVNADIKATT  |  | -0,1436 |                 |  |         |
| KERKHRIEDAVRNAK  |  | -0,1438 |                 |  |         |
| AEINGMSRDMASTFT  |  | -0,1439 |                 |  |         |
| TGMPAAPMVPPTGSP  |  | -0,1441 |                 |  |         |
| ARWSPGDSATVAGPL  |  | -0,1443 |                 |  |         |
| RGDSQDQDAMARLGA  |  | -0,1445 |                 |  |         |
| RLSALGPGGLSRERA  |  | -0,1448 |                 |  |         |
| ATADLSQRLGRAPSA  |  | -0,1456 |                 |  |         |
| TLARVAAFIGEHEPS  |  | -0,1459 |                 |  |         |
| GVVAEKVRNLPAGHG  |  | -0,146  |                 |  |         |
| VRELLATVFKLTADG  |  | -0,1461 |                 |  |         |
| QEGLDQYGSIPPKS   |  | -0,1463 |                 |  |         |
| VDCGKKTLLKASGST  |  | -0,1476 |                 |  |         |
| SDLAYTLARGRRHRP  |  | -0,1484 |                 |  |         |
| KTARALAQYLADTLA  |  | -0,1485 |                 |  |         |
| GTAVSARNTAVCAPT  |  | -0,1485 |                 |  |         |
| AAIGPGQEGLDQYGS  |  | -0,1486 |                 |  |         |
| RMTSGSSSGFKVRPS  |  | -0,1492 |                 |  |         |
| AIPPRGTQAVVLKVV  |  | -0,1502 |                 |  |         |
| RAHNAGAKNVEERPI  |  | -0,1518 |                 |  |         |
| HQTLQGADLTVIGAR  |  | -0,1519 |                 |  |         |
| DERGIVRIGAEVRDG  |  | -0,152  |                 |  |         |
| DLGIEHRDATDDQVT  |  | -0,1525 |                 |  |         |
| SQMHVSRLAKSLAR   |  | -0,1525 |                 |  |         |
| DKGILTVSVAVSEGK  |  | -0,1526 |                 |  |         |
| VASVLEVNVNEGDQI  |  | -0,1535 |                 |  |         |
| MTVPGGVEVPVETDD  |  | -0,1537 |                 |  |         |
| SSDLRVGQPVLAIGS  |  | -0,1543 |                 |  |         |
| VGAPVDALVNLADEE  |  | -0,1551 |                 |  |         |
| STGMSGGFVTAPTQG  |  | -0,1553 |                 |  |         |
| ADHVAVALFGEPSS   |  | -0,1555 |                 |  |         |
| DQAITSAGRHPDSI   |  | -0,1556 |                 |  |         |
| RVSVGNLRIARVLYD  |  | -0,1559 |                 |  |         |
| TSTAPNAAPEPVARR  |  | -0,1568 |                 |  |         |
| APKIKVSGPVVELDG  |  | -0,1569 |                 |  |         |
| LLKGAKVETKEQIA   |  | -0,1573 |                 |  |         |
| RTERLNTEGVAAAVK  |  | -0,158  |                 |  |         |
| EETLNGLIQFDAAIQ  |  | -0,1581 |                 |  |         |
| MLEGCILADSRQSKT  |  | -0,1581 |                 |  |         |
| DGTRTWRTGRQATTL  |  | -0,1587 |                 |  |         |
| SLPSYYPDQKSLENY  |  | -0,1593 |                 |  |         |

|                   |  |         |  |  |  |
|-------------------|--|---------|--|--|--|
| GESAAAVVAGALSLE   |  | -0,16   |  |  |  |
| ASQRGLGEAQLGNSS   |  | -0,1616 |  |  |  |
| ESAGAVGGDSSAELT   |  | -0,1634 |  |  |  |
| ANAGNVNTGALITGN   |  | -0,164  |  |  |  |
| DDARAITDTLGDVDA   |  | -0,1642 |  |  |  |
| AAAVVAGALSLEDAA   |  | -0,1645 |  |  |  |
| AANKQKQELDEISTN   |  | -0,1647 |  |  |  |
| VGADQVWADADLLL    |  | -0,1662 |  |  |  |
| LTPQNNQALLNARDEL  |  | -0,1662 |  |  |  |
| PTTLHFPGFTIPTGP   |  | -0,1682 |  |  |  |
| LQGADLTVIGARDDL   |  | -0,1683 |  |  |  |
| EINTLFQTLTSIAEK   |  | -0,1685 |  |  |  |
| AALPAFSPPAQALGG   |  | -0,1688 |  |  |  |
| GNNRVVKLAAGSKTQ   |  | -0,1689 |  |  |  |
| VEIDLCDYRDVDGQY   |  | -0,169  |  |  |  |
| KDQTSDEVTVETTSV   |  | -0,1696 |  |  |  |
| TPGTGMPAAPMPVPT   |  | -0,1697 |  |  |  |
| SIDSGGGSDDDARAI   |  | -0,1704 |  |  |  |
| GSLQGQWRGAAGTAA   |  | -0,1711 |  |  |  |
| MSLLDAHIPQLVASQ   |  | -0,1721 |  |  |  |
| PAVPGALGENGNMG    |  | -0,1722 |  |  |  |
| ILTGGQVISEEVGLT   |  | -0,1727 |  |  |  |
| LALLAGVFVGGAAASCA |  | -0,1739 |  |  |  |
| QVESTAGSLQGQWRG   |  | -0,1745 |  |  |  |
| LTVRVAGAYKAPAET   |  | -0,1762 |  |  |  |
| AQQAELDSALLAAAG   |  | -0,1767 |  |  |  |
| IGVLERPVGDSDDCG   |  | -0,177  |  |  |  |
| ATVLAQALVREGLRN   |  | -0,178  |  |  |  |
| DTVPLAGVVLGAGES   |  | -0,1787 |  |  |  |
| EQAGLRGLLRVISSE   |  | -0,1791 |  |  |  |
| AGASTAWVPSPTAAT   |  | -0,1791 |  |  |  |
| AVIGNRRRQDSKESK   |  | -0,181  |  |  |  |
| NSGSFNTGIGNGGTG   |  | -0,1813 |  |  |  |
| CTDDGEMALGKNLLV   |  | -0,1815 |  |  |  |
| STSSDALRQTARQLA   |  | -0,1818 |  |  |  |
| VTYELAVDLAVPMIG   |  | -0,1828 |  |  |  |
| INISLPSYYPDQKSL   |  | -0,1837 |  |  |  |
| LLKQYGPLTPARAVA   |  | -0,1852 |  |  |  |
| ESRDAKQELIDSLEE   |  | -0,1855 |  |  |  |
| LRALLKQYGPLTPAR   |  | -0,1868 |  |  |  |
| GGYSQGATVIDLSTS   |  | -0,1896 |  |  |  |
| GMDFVGVVTVAVGEGV  |  | -0,1897 |  |  |  |
| SYYPDQKSLNENYIAQ  |  | -0,1914 |  |  |  |
| NVGQQLSGLLFAGTG   |  | -0,1919 |  |  |  |
| VVPSVVMLETDLGRQ   |  | -0,1922 |  |  |  |
| KVAVSVGDVIQAGDL   |  | -0,1927 |  |  |  |
| NETDFAGSDVPLNPS   |  | -0,1928 |  |  |  |
| EAEAAHGTVTRHYRQ   |  | -0,1932 |  |  |  |
| SAAERGDVNPVGGLLE  |  | -0,1933 |  |  |  |
| AASAAPSIPAANMPP   |  | -0,1935 |  |  |  |
| FEATLAATVSPAMVA   |  | -0,1938 |  |  |  |
| DERSDSVLSDSSPVA   |  | -0,1943 |  |  |  |
| AITFPEIPANADGEL   |  | -0,1945 |  |  |  |
| EQQLARQQRVAAAAGF  |  | -0,1962 |  |  |  |
| YQQRSEKVLTEYNNK   |  | -0,1962 |  |  |  |
| VPDNLAELGRLTQLP   |  | -0,1963 |  |  |  |
| AEAERAPIDAGTAAS   |  | -0,198  |  |  |  |
| LFFASKLAAAGCGRI   |  | -0,1981 |  |  |  |
| KSLENYIAQTRDKFL   |  | -0,1983 |  |  |  |
| APEMTSAGGLLEQAA   |  | -0,1983 |  |  |  |
| KLREPLEVPGLLDVQ   |  | -0,1985 |  |  |  |
| QLVVALPDKSTGLAN   |  | -0,2    |  |  |  |
| VKLNLTLSAAAEALT   |  | -0,2001 |  |  |  |
| ARIANGMGATVTVLD   |  | -0,202  |  |  |  |
| HLVEGVARVLTTPRF   |  | -0,2024 |  |  |  |
| VEFAEQIRRTDGYG    |  | -0,2025 |  |  |  |

|                    |  |         |  |  |  |
|--------------------|--|---------|--|--|--|
| DPRHAGPATAADAGD    |  | -0,2032 |  |  |  |
| NKGDLA AA VDKDGT A |  | -0,2032 |  |  |  |
| GEVDEEAAT ALDNDG   |  | -0,2036 |  |  |  |
| FVNNEALPGTDIDPD    |  | -0,2052 |  |  |  |
| LAQPTQGTT PSSKLG   |  | -0,2052 |  |  |  |
| VAAVALFGEPSSGFS    |  | -0,2058 |  |  |  |
| DSSDCGTIRVGSFRG    |  | -0,2093 |  |  |  |
| VKDVGAGRSLLDNRA    |  | -0,2095 |  |  |  |
| DKVVADLTPQNQALL    |  | -0,2109 |  |  |  |
| GGASASRANEYADVPE   |  | -0,2116 |  |  |  |
| LAASRACTDALLD SG   |  | -0,2126 |  |  |  |
| AVVLPGLVGLAGGAA    |  | -0,2132 |  |  |  |
| FSIPQLGFTLSGATP    |  | -0,2135 |  |  |  |
| ELPGLGPLPATGRGL    |  | -0,2137 |  |  |  |
| NSTELPSSGFFNTGG    |  | -0,2138 |  |  |  |
| SSTAVIPGYPVAGQV    |  | -0,2142 |  |  |  |
| AAVYRTDLADRVDTL    |  | -0,2149 |  |  |  |
| CSKYPDSQVGTAVKA    |  | -0,2155 |  |  |  |
| SSMRAVDRAAQIAGA    |  | -0,2155 |  |  |  |
| VELGYDRTAHQDVPS    |  | -0,2162 |  |  |  |
| RRSPWGEMFASTGQR    |  | -0,2166 |  |  |  |
| TLVVNKIRGTFKSVA    |  | -0,217  |  |  |  |
| SDQDAMARLGAIKRE    |  | -0,2174 |  |  |  |
| LVEHMGILGQRCAP     |  | -0,2183 |  |  |  |
| TAAAVVLPGLVGLAG    |  | -0,2192 |  |  |  |
| NPGELLPEAAGPTQV    |  | -0,2194 |  |  |  |
| AANPTGPASVQGMSQ    |  | -0,2203 |  |  |  |
| STNNDDPAGACRPF D   |  | -0,2233 |  |  |  |
| HVSRLLAKSLARLRD    |  | -0,2237 |  |  |  |
| AMDKVGNEGVITVEE    |  | -0,2253 |  |  |  |
| ASGLVIPDTAKEKPQ    |  | -0,2258 |  |  |  |
| PHENELIKVKTYLK     |  | -0,2258 |  |  |  |
| GLSDLYSKIESLPAS    |  | -0,2272 |  |  |  |
| GFMNVGQQLSGLLFA    |  | -0,2276 |  |  |  |
| LGAEIAVEQAALQSA    |  | -0,2284 |  |  |  |
| GPGVTALVMGGTDSL    |  | -0,2313 |  |  |  |
| ERAPIDAGTAASQRG    |  | -0,2319 |  |  |  |
| VGPGCAEYAAANPTG    |  | -0,2325 |  |  |  |
| LKRGIEKAVEKVTET    |  | -0,2326 |  |  |  |
| APTTGVLPPAANDVS    |  | -0,2336 |  |  |  |
| VLSWLSDHQVHNVAA    |  | -0,2338 |  |  |  |
| YPDSQVGTAVKAFLQ    |  | -0,2363 |  |  |  |
| ANSPIDADGRFVEPR    |  | -0,2365 |  |  |  |
| RGPGQMLGGLPVGQM    |  | -0,239  |  |  |  |
| RTVSLPVGADDDIK     |  | -0,2393 |  |  |  |
| MDYEQDWDGVAITLT    |  | -0,2398 |  |  |  |
| LESSLLKSLEGT YR    |  | -0,2408 |  |  |  |
| ARDADMLSELGEPVD    |  | -0,2412 |  |  |  |
| IVKGENIPEGP IES    |  | -0,2432 |  |  |  |
| TTTASGLVIPDTAKE    |  | -0,2464 |  |  |  |
| LPVEYLQVPSPSMGR    |  | -0,2482 |  |  |  |
| LPTVGQVTATMGQLQ    |  | -0,2502 |  |  |  |
| GLAAGLAGMGNIGLG    |  | -0,2507 |  |  |  |
| DSATVAGPLAADSRG    |  | -0,2512 |  |  |  |
| NTGGLPPGTPAVVSG    |  | -0,2513 |  |  |  |
| EKEKASVPGGDMGG     |  | -0,2533 |  |  |  |
| GDTNTGGFNPGSTNT    |  | -0,2534 |  |  |  |
| AGSKTQTVLPFTGLN    |  | -0,2535 |  |  |  |
| LIPGFLMPPSDGSGV    |  | -0,2559 |  |  |  |
| PQNAIPLTIDASGVL    |  | -0,256  |  |  |  |
| EQRVDPNLAELGRLT    |  | -0,2572 |  |  |  |
| WLLIDTSNAVDTPDM    |  | -0,2625 |  |  |  |
| HGMLTDRDIVIKGLA    |  | -0,2625 |  |  |  |
| PAVGQRGRALIATGE    |  | -0,2638 |  |  |  |
| LNLGSGLSGIYNTST    |  | -0,2639 |  |  |  |
| STGKASHASLG VQVT   |  | -0,267  |  |  |  |

|                  |         |  |  |  |
|------------------|---------|--|--|--|
| FLRVLNRDRNYTAPG  | -0,2676 |  |  |  |
| GEAGSVAEAMARVPA  | -0,2678 |  |  |  |
| GKSFQGGVGEARGN   | -0,2678 |  |  |  |
| SKLMTRIAGAGAMGS  | -0,2691 |  |  |  |
| DLADRVDTLVGAGER  | -0,2691 |  |  |  |
| EYAAANPTGPASVQG  | -0,2713 |  |  |  |
| ILELGTSAKMLSVVP  | -0,2737 |  |  |  |
| GVVNISGIEIKDLAG  | -0,274  |  |  |  |
| DLDVVAGEPRPGNYR  | -0,2767 |  |  |  |
| NQSLIINLGLADVGS  | -0,2791 |  |  |  |
| PAATIDQLKTDAKLL  | -0,2806 |  |  |  |
| AVLVPGAKAPKLVSN  | -0,2815 |  |  |  |
| PVATAASNPNMLSTL  | -0,2825 |  |  |  |
| LPQWLSANRAVKPTG  | -0,2848 |  |  |  |
| MLKRKAERRLIDGAL  | -0,285  |  |  |  |
| VRAFAEPAGIKIEAS  | -0,286  |  |  |  |
| AEAADAIRAMSNAEH  | -0,2926 |  |  |  |
| LVLRPSWSPTQASGQ  | -0,2947 |  |  |  |
| GNPLADLIQPDRLVL  | -0,2967 |  |  |  |
| QSIGDLIAEAMDKVG  | -0,2969 |  |  |  |
| DVRAEIVASVLEVVV  | -0,2975 |  |  |  |
| GIPDPGDI FNTGSSL | -0,2981 |  |  |  |
| RIGAEVRDGDILVGK  | -0,2989 |  |  |  |
| VPPPVI AENRAELMI | -0,2992 |  |  |  |
| TIDAIELPAISFSQS  | -0,3001 |  |  |  |
| VAVSPPAAGDLVGP   | -0,3004 |  |  |  |
| ILSGSERVQAATIKR  | -0,3004 |  |  |  |
| SIIDIPALPGFGNST  | -0,3022 |  |  |  |
| QLPDTNIIKLPNISA  | -0,3029 |  |  |  |
| AGVTCVGEHETLTAA  | -0,3029 |  |  |  |
| DTESLSAGHAKPCAG  | -0,3031 |  |  |  |
| DLLAAGVADPVKVTR  | -0,3033 |  |  |  |
| LTSLTAAERGPQGM   | -0,3044 |  |  |  |
| TRIEAVPIAGFAQMR  | -0,3063 |  |  |  |
| SLCLNVEVLSSDGAA  | -0,3071 |  |  |  |
| TPEERLLRAIFGEKA  | -0,3073 |  |  |  |
| GLYNTGGLPPGTPAV  | -0,3078 |  |  |  |
| SAGTALNQSLIINLG  | -0,311  |  |  |  |
| NISVPDSSVPIIIVP  | -0,3113 |  |  |  |
| GMLVGSVGETVAQLA  | -0,3131 |  |  |  |
| PIPEGLTTGRSCQTD  | -0,3135 |  |  |  |
| GLTHKRRLSALGPGG  | -0,3141 |  |  |  |
| FKQISDKMGLAIPGT  | -0,3153 |  |  |  |
| AFGRFPIIDDRPQL   | -0,3202 |  |  |  |
| GVDVVG YDRTQDVAV | -0,3221 |  |  |  |
| DIEETIQEITRGRCA  | -0,3222 |  |  |  |
| VRDQPARQLVQRSEE  | -0,3223 |  |  |  |
| GAPNRVSFAKLREPL  | -0,3254 |  |  |  |
| NGVTLGYTSGTGQGN  | -0,3256 |  |  |  |
| YPASDDYRASASNGS  | -0,3264 |  |  |  |
| LSGIYNTSTLPLGTP  | -0,3275 |  |  |  |
| LPDIIDGLWPPKLPD  | -0,3277 |  |  |  |
| PGDSGGPVVNLGQV   | -0,3286 |  |  |  |
| AGAATEVELKERKHR  | -0,3355 |  |  |  |
| GAAEKQDPLSGLTDQ  | -0,3374 |  |  |  |
| LQELLTIKSDDTVGR  | -0,3388 |  |  |  |
| DIASERTAPSRACQG  | -0,3412 |  |  |  |
| TLPNRDGDVLVDADG  | -0,3429 |  |  |  |
| TIDQLKTDAKLLSSI  | -0,3452 |  |  |  |
| AGVLLRTERLKSQRV  | -0,3502 |  |  |  |
| ASLVGFNRAPAGPSG  | -0,3504 |  |  |  |
| VDMPYLTVELIEDLA  | -0,3518 |  |  |  |
| QTSpanVVGTRQTLQ  | -0,361  |  |  |  |
| LKTQIDQVESTAGSL  | -0,362  |  |  |  |
| ARGANILARIMGASI  | -0,3622 |  |  |  |
| NATNLRGILGRLIEM  | -0,3629 |  |  |  |

|                  |         |  |  |
|------------------|---------|--|--|
| GGNRPAVYAPKSALG  | -0,3672 |  |  |
| QTDFGGSDVPLSKDE  | -0,3699 |  |  |
| NRANEVEAPMADPPT  | -0,3754 |  |  |
| MLSSTSSDALRQTAR  | -0,376  |  |  |
| IGSPLGLEGTVTTGI  | -0,3771 |  |  |
| NALGGNRPAVYAPKS  | -0,3814 |  |  |
| ARSQPNPKARQTIEG  | -0,3825 |  |  |
| AGMAQDPVATAASNN  | -0,3833 |  |  |
| LDELKLEGDEATGAN  | -0,3906 |  |  |
| LAGCSSTKPVSQDTS  | -0,3926 |  |  |
| LTDLFPIELGTSAK   | -0,3946 |  |  |
| AMSNLLGQNAAAIAA  | -0,395  |  |  |
| VGISQMHVSRLLAKS  | -0,395  |  |  |
| FQDPSSGGSRTVQVTL | -0,3974 |  |  |
| LGFAIPVDQAKRIAD  | -0,3978 |  |  |
| VPVLRDELPGLGPLP  | -0,3996 |  |  |
| PIAHSTVLVAPVSPS  | -0,4013 |  |  |
| EVLADLDERGIVRIG  | -0,4029 |  |  |
| TTTLVEHMGILGQR   | -0,4039 |  |  |
| VTQPDRVRELLATVF  | -0,4067 |  |  |
| DEDDIKATYDKGILT  | -0,4076 |  |  |
| FDAAIQPGDSSGPPV  | -0,4109 |  |  |
| LLRGDDLVEIPPDR   | -0,4111 |  |  |
| ARPDVAVLDVRLPDG  | -0,4136 |  |  |
| KQLNMAQIITSAGPD  | -0,4148 |  |  |
| TRGLQHHRGKLDGTPE | -0,4168 |  |  |
| IGPATIIPPIHPSI   | -0,4169 |  |  |
| AIPLTSATLGGLALP  | -0,4189 |  |  |
| EVRAELPGVDPDKDV  | -0,4217 |  |  |
| LERPVGDSDDCGTIR  | -0,4233 |  |  |
| PEVDTNRLMVSIGTG  | -0,4241 |  |  |
| VGLSTIAGRLLGSVP  | -0,425  |  |  |
| LALNISVPDSSVPPI  | -0,4327 |  |  |
| TTLLALLAGVFGGAA  | -0,4384 |  |  |
| NVARELSRCGSTGDR  | -0,4395 |  |  |
| KFLSAATSSTPREAP  | -0,4434 |  |  |
| STSAMPVAVADHVAA  | -0,4585 |  |  |
| VDISGMFNVSTLGSA  | -0,4619 |  |  |
| LDEHGTVLLAVRGLR  | -0,4627 |  |  |
| NMAQIITSAGPDPVA  | -0,4628 |  |  |
| VASHSPQVDPILDDL  | -0,4652 |  |  |
| PDRVRELLATVFKLT  | -0,4679 |  |  |
| PTNAAFDKLPAATID  | -0,4691 |  |  |
| QGAVQGVNDALSGLG  | -0,4719 |  |  |
| NMQRQAVPLVRSEAP  | -0,4719 |  |  |
| LPSLPDIIDGLWPPK  | -0,4763 |  |  |
| GFTIPGGTLIPQLPL  | -0,4797 |  |  |
| AAKVVPVVMLETDL   | -0,4838 |  |  |
| LELPGIDVDKDVNVE  | -0,4846 |  |  |
| AQEAELQGLLSCTLP  | -0,4849 |  |  |
| LGADIASERTAPSRA  | -0,4921 |  |  |
| DRQNAGDVAYRPMAP  | -0,4924 |  |  |
| LPPAANDVSVLTAAR  | -0,5001 |  |  |
| GYGVDIVLNSLTGAA  | -0,5022 |  |  |
| VITSADVRLASLERMA | -0,5023 |  |  |
| LTSAAERGPQMLGG   | -0,5073 |  |  |
| DGPCTDDGEMALGKN  | -0,5112 |  |  |
| AGVDKVVADLTPQNQ  | -0,5134 |  |  |
| EQVAAKVVPVVMLE   | -0,5221 |  |  |
| SADVRLASLERMAPLV | -0,5231 |  |  |
| RAELMILIATNLLGQ  | -0,5259 |  |  |
| PPITIDRIPLNLGAS  | -0,5291 |  |  |
| VDMANPMSPVNKSFE  | -0,5417 |  |  |
| PIDAGTAASQRGQEG  | -0,5469 |  |  |
| SALLDPSQGMGPSLI  | -0,5515 |  |  |
| IGKLLDNDKSPSRKT  | -0,5561 |  |  |

|                  |         |  |  |  |
|------------------|---------|--|--|--|
| QQVSIAPNAGLDPVN  | -0,5571 |  |  |  |
| QGLLSCTLPNRDGDV  | -0,561  |  |  |  |
| DKPEKEKASVPGGGD  | -0,5642 |  |  |  |
| TQQALAAGVPVIGLP  | -0,5709 |  |  |  |
| YQAGKPTSTNPIASI  | -0,5761 |  |  |  |
| AGADPTALNGMPAGL  | -0,5782 |  |  |  |
| DAKQELIDSLEEAVR  | -0,5811 |  |  |  |
| ILSDILSALAANADP  | -0,5885 |  |  |  |
| LRVLDEIAPDLVVGD  | -0,5894 |  |  |  |
| GPDGMPGGEVSILQP  | -0,5913 |  |  |  |
| EIVKDGDDAVVRLEL  | -0,5921 |  |  |  |
| PITLTIPGLSLDAAV  | -0,6155 |  |  |  |
| LNALADAVKVTLGPK  | -0,6202 |  |  |  |
| AANADPLTSGLLGIA  | -0,6346 |  |  |  |
| ALACVLGECLTGAPP  | -0,6376 |  |  |  |
| PPGILSDILSALAAN  | -0,6464 |  |  |  |
| LIATNLLGQNTPAIA  | -0,6471 |  |  |  |
| LENADLSLLGKARKV  | -0,6647 |  |  |  |
| VKMLLNNVLEHLAEN  | -0,6658 |  |  |  |
| VSGLGKKEAKDLVDG  | -0,6661 |  |  |  |
| SVPQLVAAIKELQDK  | -0,6786 |  |  |  |
| NLRGILGRLIEMLT   | -0,6892 |  |  |  |
| ATVALTFQDPSSGGS  | -0,728  |  |  |  |
| DILSALAANADPLTS  | -0,7457 |  |  |  |
| SVVMLETDLGRQSEE  | -0,7471 |  |  |  |
| SVQDTPPNDAQGLEK  | -0,7487 |  |  |  |
| IKGMELARAVKDVGA  | -0,7558 |  |  |  |
| EKLQERLAKLAGGVA  | -0,7585 |  |  |  |
| AGKPLIIAEDVEGE   | -0,7703 |  |  |  |
| STIAGRLLGSVPANV  | -0,782  |  |  |  |
| DAAIGKLLDNDKSPS  | -0,8085 |  |  |  |
| LIDGALKDLKKRVEG  | -0,8086 |  |  |  |
| PVDALVNLADEEKAD  | -0,8292 |  |  |  |
| MSGVLNAISDPLLGS  | -0,8474 |  |  |  |
| GILGRLIEMLTTLPK  | -0,9109 |  |  |  |
| TVELIEDLARRAVQT  | -0,9572 |  |  |  |
| AEIVASVLEVVNNEG  | -0,9657 |  |  |  |
| STVKDLLPLEKVIG   | -1,0346 |  |  |  |
| PLLEKVAKEAADEAK  | -1,0988 |  |  |  |
| PELDVVGEAGSVAEA  | 0,1002  |  |  |  |
| NMREYLAAGAKERQR  | 0,0362  |  |  |  |
| AQDPVATAASNNPML  | -0,0356 |  |  |  |
| LGGANIPAEFLENFV  | -0,1184 |  |  |  |
| RPIVGAPVDALVNLA  | -0,1383 |  |  |  |
| FVPQAVTPWPNGNDH  | -0,1695 |  |  |  |
| IDTSNAVDTPDMLAS  | -0,1783 |  |  |  |
| AAGVADPVKVTRSAL  | -0,2049 |  |  |  |
| PLPTLPVPVLRDELP  | -0,2552 |  |  |  |
| DTKLGAEIITRDIPN  | -0,2644 |  |  |  |
| PLDDGDVIDSMFMSK  | -0,2686 |  |  |  |
| VEERPIVGAPVDALV  | -0,2848 |  |  |  |
| DGSAPIVHEMVSIP   | -0,3052 |  |  |  |
| AAGTTASPGAASGPK  | -0,3347 |  |  |  |
| MAEMKTAATLAQEA   | -0,3455 |  |  |  |
| AVCAPTTGVLPPAAN  | -0,3682 |  |  |  |
| KKELHSSGSTAQENA  | -0,4079 |  |  |  |
| TQVLVPRSAIDSMILA | -0,4171 |  |  |  |
| DKLPAATIDQLKTD   | -0,4355 |  |  |  |
| SQGATVIDLSTAMP   | -0,4514 |  |  |  |
| VTIPTITTSPIPLKI  | -0,455  |  |  |  |
| LSTDELLDAFKEMTL  | -0,4623 |  |  |  |
| NGIELCRDLLSRMPD  | -0,4827 |  |  |  |
| NLAELGRLTQLPDTN  | -0,5231 |  |  |  |
| FVVTRQAQIVKPHDS  | -0,5445 |  |  |  |
| NRVSFAKLREPLEVP  | -0,5502 |  |  |  |
| AKNVEERPIVGAPVD  | -0,2301 |  |  |  |

|                 |  |         |  |  |  |
|-----------------|--|---------|--|--|--|
| IDLSTSAMPPAVADH |  | -0,4124 |  |  |  |
| DAMARLGAIKREVTS |  | -0,4153 |  |  |  |
| TLPVPVLRDELPGLG |  | -0,5232 |  |  |  |
| MNPDIKQDQTSDEVT |  | -0,5293 |  |  |  |
| AQQLRAQVMGDLDKL |  | -0,5766 |  |  |  |
| VLAAATGDLPTIGTA |  | -0,6067 |  |  |  |
| AAERGPGQMLGGLPV |  | -0,462  |  |  |  |
| DVQVTMPVPEPMVKM |  | -0,501  |  |  |  |
| GLREVADGDALYDAA |  | -0,2997 |  |  |  |
| ALAAGVPVIGLPSNM |  | -0,6886 |  |  |  |

The top 100 recognized epitopes, defined by the index values, are listed with the respective MTB protein and accession number.
