# Supplementary material for: Pattern Recognition in Pulmonary Tuberculosis Defined by High Content Peptide Microarray Chip Analysis Representing 61 Proteins from M. tuberculosis
Source: PLoS One. 2008 Dec 9;3(12):e3840. doi: 10.1371/journal.pone.0003840 (PMC2588537; doi:10.1371/journal.pone.0003840)
Supplement: Table S6 — S6a: MTB Peptides recognized by both IgG and IgA, S6b: MTB Peptides recognized by IgG and not by IgA, S6c: MTB Peptides recognized by IgA and not by IgG. (0.75 MB PDF) [file pone.0003840.s006.pdf]

**Supplementary Table 6a. Peptides recognized by both IgG and IgA**

| Peptide ID       | Protein                                                                | IgA Average Index | IgG Average Index |
|------------------|------------------------------------------------------------------------|-------------------|-------------------|
| WSRPVWDVEPWDRWL  | CAA17343.1; HEAT SHOCK PROTEIN HSP                                     | 2.175             | 2.938             |
| LALWSRPVWDVEPWD  | CAA17343.1; HEAT SHOCK PROTEIN HSP                                     | 1.678             | 2.839             |
| PVWDVEPWDRWLDRDF | CAA17343.1; HEAT SHOCK PROTEIN HSP                                     | 1.961             | 2.760             |
| WEYWGAQLNAMKGDL  | CAB10044.1; SECRETED ANTIGEN 85-B FBPB (85B)                           | 2.133             | 2.524             |
| LADIAPMTPKVPYYS  | MYCOBACTERIUM BOVIS MYCOCEROSIC ACID SYNTHASE GENE; M95808             | 0.439             | 2.343             |
| GEMWAQDAAMFGYA   | CAE55371.1; PPE FAMILY PROTEIN                                         | 1.297             | 2.329             |
| WSWELAIMSGIAMA   | CAB06237.1; CONSERVED HYPOTHETICAL PROTEIN                             | 1.263             | 2.318             |
| THSWEYWGAQLNAMK  | CAB10044.1; SECRETED ANTIGEN 85-B FBPB (85B)                           | 1.765             | 2.313             |
| EYEQIWAQDVAAMFG  | PPE FAMILY PROTEIN CAE55504                                            | 1.807             | 2.297             |
| TNDGVIFFNPGELL   | CAA98382.1; IMMUNOGENIC PROTEIN MPT64                                  | 1.549             | 2.262             |
| GTAVGTNYMAPERF   | TRANSMEMBRANE SERINE/THREONINE-PROTEIN KINASE D PKND NP_215446         | 1.138             | 2.259             |
| EYAEMWAQDAVMYS   | PPE FAMILY PROTEIN CAE55334                                            | 1.035             | 2.249             |
| DVEPWDRWLDRDFGP  | CAA17343.1; HEAT SHOCK PROTEIN HSP                                     | 1.696             | 2.248             |
| SAAIAATQAEYAEMW  | PPE FAMILY PROTEIN CAE55334                                            | 0.868             | 2.156             |
| DWDFNIRCFSPALV   | POSSIBLE GLYCOSYL TRANSFERASE CAB05419                                 | 1.584             | 2.102             |
| DYITVMHDNGTRRTY  | RNA POLYMERASE BETA-SUBUNIT AAA21416                                   | 0.661             | 2.078             |
| MKAIDIEAYPQWIS   | CONSERVED HYPOTHETICAL PROTEIN TB16.3CAD97060                          | 0.893             | 2.072             |
| EKIFGPTRDWECYCG  | RNA POLYMERASE BETA-SUBUNIT AAA21417                                   | 1.197             | 2.071             |
| VGMYIMKLHHLVDD   | RNA POLYMERASE BETA-SUBUNIT AAA21416                                   | 1.209             | 2.062             |
| YKAADMWGPSSDPAW  | CAB10044.1; SECRETED ANTIGEN 85-B FBPB (85B)                           | 1.969             | 2.032             |
| MKLHHLVDDKIARS   | RNA POLYMERASE BETA-SUBUNIT AAA21416                                   | 1.148             | 2.030             |
| LETHLGWCAHSGWKV  | RNA POLYMERASE BETA-SUBUNIT AAA21416                                   | 0.850             | 2.027             |
| GYVVKDIKGMELARA  | TWO COMPONENT TRANSCRIPTIONAL REGULATORY PROTEIN DEVR NP_217649        | 0.015             | 2.020             |
| QAQWNQAMEDLVRAY  | CAA17363.1; LOW MOLECULAR WEIGHT PROTEIN ANTIGEN 7 ESXH                | 1.365             | 2.016             |
| AQFGGQRFGECECWA  | RNA POLYMERASE BETA-SUBUNIT AAA21416                                   | 1.117             | 2.016             |
| VAMNNGMEDLLIWEP  | CAB06500.1; IMMUNOGENIC PROTEIN MPT63                                  | 0.670             | 1.991             |
| GHLWSWELAIMSGI   | CAB06237.1; CONSERVED HYPOTHETICAL PROTEIN                             | 1.085             | 1.953             |
| EIVRAYEWAHDMVP   | PPE FAMILY PROTEIN CAE55489                                            | 0.818             | 1.951             |
| FGEPSGFSMLWGG    | PROBABLE CUTINASE PRECURSOR CFP21 NP_216500                            | 0.725             | 1.950             |
| FKDTLIMSYEWPEDR  | CONSERVED HYPOTHETICAL PROTEIN TB16.3CAD97060                          | 1.724             | 1.948             |
| TGRSLMSVAALAGM   | MYCOBACTERIUM BOVIS MYCOCEROSIC ACID SYNTHASE GENE; M95808             | 0.030             | 1.942             |
| DPAFTFMDYEQDWDG  | MYCOBACTERIUM BOVIS ACYL-COA SYNTHASE GENE; U75685                     | 0.966             | 1.913             |
| PILGAPWLADLVRRS  | MYCOBACTERIUM BOVIS MYCOCEROSIC ACID SYNTHASE GENE; M95808             | 1.277             | 1.899             |
| PARWMHLMASDFHAF  | MYCOBACTERIUM BOVIS ACYL-COA SYNTHASE GENE; U75685                     | 0.958             | 1.888             |
| HGLIGFGESYMAGEW  | PUTATIVE CYCLOPROPANE-FATTY-ACYL-PHOSPHOLIPID SYNTHASE UFAA1 NP_854118 | 1.124             | 1.884             |
| RAQVGKGMWMTTELM  | MTB81                                                                  | 1.181             | 1.882             |
| FWDEDEGEVMRDYRLR | PPE FAMILY PROTEIN CAE55489                                            | 2.145             | 1.867             |
| SYDDMRARGMKAVSP  | 3-OXOACYL-[ACYL-CARRIER PROTEIN] SYNTHASE 2 KASB CAA94642              | 0.253             | 1.860             |
| NFPNGTHSWEYWGA   | CAB10044.1; SECRETED ANTIGEN 85-B FBPB (85B)                           | 1.201             | 1.855             |
| KGVPDWAARLPDELL  | RNA POLYMERASE BETA-SUBUNIT AAA21416                                   | 1.152             | 1.827             |
| VQAAMEDGYRVFADV  | MYCOBACTERIUM BOVIS MYCOCEROSIC ACID SYNTHASE GENE; M95808             | 0.712             | 1.826             |
| KAMLFDRSGEPFPY   | RNA POLYMERASE BETA-SUBUNIT AAA21416                                   | 0.862             | 1.813             |
| AGGSGFGNFGANMS   | YP_177963; PPE FAMILY PROTEIN                                          | 0.482             | 1.811             |
| VKAPGFGDRRKAMLQ  | 60 kDa chaperonin 2 P0A521                                             | 1.175             | 1.797             |
| FTFMDYEQDWDGVAI  | MYCOBACTERIUM BOVIS ACYL-COA SYNTHASE GENE; U75685                     | 0.915             | 1.794             |
| FGNFGANMSGWWNQA  | YP_177963; PPE FAMILY PROTEIN                                          | 0.964             | 1.793             |
| LCKTTSNFIWGQLL   | CAB06237.1; CONSERVED HYPOTHETICAL PROTEIN                             | 1.555             | 1.788             |
| PTIMGEVRRHFRDNS  | ALTERNATE RNA POLYMERASE SIGMA FACTOR SIGF CAB07069                    | 0.660             | 1.787             |
| WPDWPPTTFGYHEFF  | POSSIBLE HEMOLYSIN-LIKE PROTEIN CAA17201                               | 0.876             | 1.782             |
| GMYNFKESIRDFARA  | CAA17111.1; PROBABLE ISOCITRATE DEHYDROGENASE                          | 0.681             | 1.776             |
| PNGTHSWEYWGAQLN  | CAB10044.1; SECRETED ANTIGEN 85-B FBPB (85B)                           | 1.400             | 1.775             |
| RCGSPAWDLPTVFGP  | PERIPLASMIC PHOSPHATE-BINDING LIPOPROTEIN PSTS2 YP_177769              | 0.447             | 1.757             |
| NYPAMLGHAGDMAGY  | CAA17363.1; LOW MOLECULAR WEIGHT PROTEIN ANTIGEN 7 ESXH                | 0.814             | 1.755             |
| KWETFLTSELPQWLS  | CAB10044.1; SECRETED ANTIGEN 85-B FBPB (85B)                           | 0.477             | 1.727             |
| EKIPLLGHLWSWELA  | CAB06237.1; CONSERVED HYPOTHETICAL PROTEIN                             | 1.225             | 1.725             |
| WNQAMEDLVRAYHAM  | CAA17363.1; LOW MOLECULAR WEIGHT PROTEIN ANTIGEN 7 ESXH                | 1.186             | 1.704             |
| GLMVAAASPYVAWMS  | CAE55371.1; PPE FAMILY PROTEIN                                         | 0.178             | 1.694             |
| ITYQAWQAQWNQAME  | CAA17363.1; LOW MOLECULAR WEIGHT PROTEIN ANTIGEN 7 ESXH                | 0.886             | 1.692             |

|                  |                                                                        |        |       |
|------------------|------------------------------------------------------------------------|--------|-------|
| AQIADLDQEYDDFDWD | PPE FAMILY PROTEIN CAE55489                                            | 0.833  | 1.691 |
| WHRRRVIEPIDMDAY  | MTB81                                                                  | 1.231  | 1.690 |
| MTEQQWNFAGIEAAA  | CAE55648                                                               | 0.260  | 1.690 |
| SMLWGGGSLPTIGPL  | PROBABLE CUTINASE PRECURSOR CFP21 NP_216500                            | 0.252  | 1.682 |
| GPVLWSPAGKPPTWW  | POSSIBLE GLYCOSYL TRANSFERASE CAB05415                                 | 0.919  | 1.651 |
| MTAHTHDGTRTWRTG  | CAB10947.1; PROBABLE LIPOPROTEIN LPRJ                                  | 1.910  | 1.645 |
| QSSFYSDWYSPACGK  | CAB10044.1; SECRETED ANTIGEN 85-B FBPB (85B)                           | 1.352  | 1.631 |
| GLATAEDIRQWSYGE  | RNA POLYMERASE BETA'-SUBUNIT AAA21417                                  | 0.872  | 1.611 |
| MASGSGLCKTTSNFI  | CAB06237.1; CONSERVED HYPOTHETICAL PROTEIN                             | 0.748  | 1.609 |
| CAMFTDLLAQPTPAW  | PUTATIVE CYCLOPROPANE-FATTY-ACYL-PHOSPHOLIPID SYNTHASE UFAA1 NP_854118 | 0.793  | 1.593 |
| VSYGSSVSTLIVEPW  | PPE FAMILY PROTEIN CAE55334                                            | 0.721  | 1.591 |
| KTSTYALTNATMPYV  | SECRETED L-ALANINE DEHYDROGENASE ALD CAA15575                          | -0.024 | 1.589 |
| VIPTMTPPPGRMVRQR | CAA17582.1; PROBABLE SERINE PROTEASE PEPD                              | -0.017 | 1.588 |
| ATFEMRYLQSLPAHL  | PPE FAMILY PROTEIN CAE55504                                            | 0.497  | 1.581 |
| PNYHMEVGSPYAVEY  | MCE-FAMILY PROTEIN MCE1AYP_177701                                      | 0.476  | 1.580 |
| KYGGTEIKYNGEYL   | CAB01005.1; 10 KDA CHAPERONIN GROES                                    | 1.369  | 1.567 |
| KALCDFYEEQMQDAF  | PROBABLE ISOCITRATE DEHYDROGENASE CAA16247                             | 1.112  | 1.564 |
| VAHMRHGDYFAGEKS  | PROBABLE ISOCITRATE DEHYDROGENASE CAA16247                             | 0.953  | 1.557 |
| HPTTTYKAFDWDQAY  | CAA98382.1; IMMUNOGENIC PROTEIN MPT64                                  | 0.831  | 1.553 |
| GGTSDTVRDLIARWE  | MYCOBACTERIUM BOVIS MYCOCEROSIC ACID SYNTHASE GENE; M95808             | 0.811  | 1.546 |
| KAFDWDQAYRKPTY   | CAA98382.1; IMMUNOGENIC PROTEIN MPT64                                  | 0.631  | 1.535 |
| EMECWAMQAYGAAYT  | RNA POLYMERASE BETA-SUBUNIT AAA21416                                   | 0.593  | 1.530 |
| GLEVRDVHPSHYGRM  | RNA POLYMERASE BETA-SUBUNIT AAA21416                                   | 0.586  | 1.528 |
| HPHSMGEWSMASRTH  | PROBABLE ISOCITRATE DEHYDROGENASE CAA16247                             | 1.341  | 1.509 |
| DGDVIDSMFMSSKAL  | PROBABLE ISOCITRATE DEHYDROGENASE CAA16247                             | 0.273  | 1.507 |
| RDFFGPAATTDWYRP  | CAA17343.1; HEAT SHOCK PROTEIN HSP                                     | 0.775  | 1.507 |
| MSHQDWQAQWNQAME  | CAA16102.1; ESAT-6 LIKE PROTEIN ESXQ                                   | 0.876  | 1.504 |
| FGANMSGWWNQAHTA  | YP_177963; PPE FAMILY PROTEIN                                          | 0.648  | 1.503 |
| AIANNEAEYGEWMAQ  | CAE55371.1; PPE FAMILY PROTEIN                                         | 0.579  | 1.496 |
| EYAARFITPVHPGYT  | PPE FAMILY PROTEIN CAE55504                                            | 0.922  | 1.494 |
| ADMWGPSSDPAWERN  | CAB10044.1; SECRETED ANTIGEN 85-B FBPB (85B)                           | 1.161  | 1.493 |
| LGPVLWSPDVKPPTW  | POSSIBLE GLYCOSYL TRANSFERASE CAB05418                                 | 0.893  | 1.483 |
| AAIFKDTLIMSIEWP  | CONSERVED HYPOTHETICAL PROTEIN TB16.3CAD97060                          | 0.612  | 1.482 |
| GVLWRGDYEGWLWGLS | YP_177963; PPE FAMILY PROTEIN                                          | 0.832  | 1.477 |
| MTPKVPYYSATLFDP  | MYCOBACTERIUM BOVIS MYCOCEROSIC ACID SYNTHASE GENE; M95808             | 0.188  | 1.477 |
| LHAWSDVDVSEWPGI  | HYPOTHETICAL PROTEIN RV2623 NP_217139                                  | 0.768  | 1.472 |
| WYYQSGLSIVMPVGG  | CAB10044.1; SECRETED ANTIGEN 85-B FBPB (85B)                           | -0.096 | 1.465 |
| TAGAFSRPGLPVEYL  | CAB10044.1; SECRETED ANTIGEN 85-B FBPB (85B)                           | 0.407  | 1.458 |
| IGFGESYMAGEWSSK  | PUTATIVE CYCLOPROPANE-FATTY-ACYL-PHOSPHOLIPID SYNTHASE UFAA1 NP_854118 | 1.010  | 1.450 |
| ALMSGNFNGILWRG   | YP_177963; PPE FAMILY PROTEIN                                          | 0.723  | 1.450 |
| GSQFYLAMWYAQELA  | PROBABLE ISOCITRATE DEHYDROGENASE CAA16247                             | 1.044  | 1.438 |
| LVCGGVHTANATVYM  | CAA98350.1; CELL SURFACE LIPOPROTEIN MPT83                             | 0.526  | 1.433 |
| YRADSVERLIAAHL   | TRANSMEMBRANE SERINE/THREONINE-PROTEIN KINASE D PKND NP_215446         | 0.409  | 1.432 |
| LPLEKVIAGAKPLL   | 60 kDa chaperonin 2 P0A521                                             | -0.455 | 1.429 |
| SMFMSSKALCDFYEE  | PROBABLE ISOCITRATE DEHYDROGENASE CAA16247                             | 1.043  | 1.427 |
| KRAMLRDMGVEHVDY  | MYCOBACTERIUM BOVIS MYCOCEROSIC ACID SYNTHASE GENE; M95808             | 0.947  | 1.425 |
| FCGRIHTRYSSAYEL  | SECRETED L-ALANINE DEHYDROGENASE ALD CAA15575                          | 0.583  | 1.422 |
| FAAFLDEMTYSCAM   | PUTATIVE CYCLOPROPANE-FATTY-ACYL-PHOSPHOLIPID SYNTHASE UFAA1 NP_854118 | 0.128  | 1.422 |
| DLPSFPGFPGFPEFP  | CAB06237.1; CONSERVED HYPOTHETICAL PROTEIN                             | 0.539  | 1.414 |
| LWSPAGKPPTWWDSL  | POSSIBLE GLYCOSYL TRANSFERASE CAB05415                                 | 0.917  | 1.412 |
| IAPMTPKVPYYSATL  | MYCOBACTERIUM BOVIS MYCOCEROSIC ACID SYNTHASE GENE; M95808             | 0.185  | 1.397 |
| TLIMSIEWPEDRQSL  | CONSERVED HYPOTHETICAL PROTEIN TB16.3CAD97060                          | 0.779  | 1.393 |
| FYSDWYSPACGKAGC  | CAB10044.1; SECRETED ANTIGEN 85-B FBPB (85B)                           | 0.899  | 1.376 |
| CEASLDQQRQWILHM  | MTB48 AAK31576                                                         | 0.639  | 1.376 |
| HMEVGSPYAVEYVWG  | MCE-FAMILY PROTEIN MCE1AYP_177701                                      | 0.297  | 1.370 |
| HLGWCAHSGWKVDAA  | RNA POLYMERASE BETA-SUBUNIT AAA21416                                   | 0.311  | 1.361 |
| TPPAPAPPPFRLPLL  | YP_177963; PPE FAMILY PROTEIN                                          | 1.133  | 1.357 |
| CWQPITRDLWPAPYL  | MCE-FAMILY PROTEIN MCE1AYP_177701                                      | 0.812  | 1.356 |
| SGFGNFGAGSSGWWN  | YP_177963; PPE FAMILY PROTEIN                                          | 0.767  | 1.350 |
| ILRRTIDADRSFIEY  | MYCOBACTERIUM BOVIS MYCOCEROSIC ACID SYNTHASE GENE; M95808             | 0.227  | 1.338 |
| SPHRSPISNMVSMAN  | CAE55371.1; PPE FAMILY PROTEIN                                         | -0.095 | 1.337 |
| FDPREQPVCDGAYWV  | MYCOBACTERIUM BOVIS MYCOCEROSIC ACID SYNTHASE GENE; M95808             | 0.438  | 1.333 |

|                  |                                                                              |        |       |
|------------------|------------------------------------------------------------------------------|--------|-------|
| AIMPWEGHNYEDAI   | RNA POLYMERASE BETA-SUBUNIT AAA21416                                         | 0.534  | 1.329 |
| HWLRPITPTFRPSWP  | PUTATIVE CYCLOPROPANE-FATTY-ACYL-PHOSPHOLIPID SYNTHASE UFAA1 NP_854118       | 0.649  | 1.328 |
| FLDEMTYSCAMFTD   | PUTATIVE CYCLOPROPANE-FATTY-ACYL-PHOSPHOLIPID SYNTHASE UFAA1 NP_854118       | 0.650  | 1.328 |
| PGPDSMLAAARAWRS  | PPE FAMILY PROTEIN CAE55489                                                  | 0.564  | 1.318 |
| MRHGDFYAGEKSMTL  | PROBABLE ISOCITRATE DEHYDROGENASE CAA16247                                   | 0.560  | 1.317 |
| QIHEIVRAYEWAHHD  | PPE FAMILY PROTEIN CAE55489                                                  | 0.536  | 1.315 |
| GPWHRGGWDPIPEGL  | POSSIBLE HEMOLYSIN CAA16235                                                  | 1.023  | 1.312 |
| MNIGQILETHLGWCA  | RNA POLYMERASE BETA-SUBUNIT AAA21416                                         | 0.935  | 1.298 |
| VGTYNYMAPERFTGD  | TRANSMEMBRANE SERINE/THREONINE-PROTEIN KINASE D PKND NP_215446               | 0.882  | 1.289 |
| LFPDLPSFPGFGFP   | CAB06237.1; CONSERVED HYPOTHETICAL PROTEIN                                   | 0.430  | 1.285 |
| YYSATLFDPREQPV   | MYCOBACTERIUM BOVIS MYCOCEROSIC ACID SYNTHASE GENE; M95808                   | 0.336  | 1.285 |
| AAAVQAAMEDGYRVF  | MYCOBACTERIUM BOVIS MYCOCEROSIC ACID SYNTHASE GENE; M95808                   | 0.558  | 1.282 |
| DEIVYLTADEEDRHV  | RNA POLYMERASE BETA-SUBUNIT AAA21416                                         | 0.728  | 1.277 |
| TALLQAHPHAVNGTA  | MYCOBACTERIUM BOVIS MYCOCEROSIC ACID SYNTHASE GENE; M95808                   | 0.645  | 1.276 |
| RWLRDFFGPAATTDW  | CAA17343.1; HEAT SHOCK PROTEIN HSP                                           | 0.519  | 1.272 |
| GYIPILGAPWLADLV  | MYCOBACTERIUM BOVIS MYCOCEROSIC ACID SYNTHASE GENE; M95808                   | 0.838  | 1.270 |
| WGGAFDLDRLLFKRN  | POSSIBLE GLYCOSYL TRANSFERASE CAB05419                                       | 0.373  | 1.269 |
| RNTVQFAAAVQAAME  | MYCOBACTERIUM BOVIS MYCOCEROSIC ACID SYNTHASE GENE; M95808                   | 0.400  | 1.268 |
| AMRTLRYVEADLRV   | POSSIBLE GLYCOSYL TRANSFERASE CAB05415                                       | 0.837  | 1.266 |
| MYETGAGGSAPKHVK  | PROBABLE ISOCITRATE DEHYDROGENASE CAA16247                                   | 0.853  | 1.262 |
| ENVEAGDIWRMCIVK  | PROBABLE ISOCITRATE DEHYDROGENASE CAA16247                                   | 1.039  | 1.257 |
| DAEVVLPWDGRNHYL  | CAA16030.1; PROBABLE MOLYBDOPTERIN-GUANINE DINUCLEOTIDE BIOSYNTHESIS PROTEIN | 0.405  | 1.254 |
| SMAEQVLAERLAGWQ  | HYPOTHETICAL PROTEIN RV2623 NP_217139                                        | 0.867  | 1.253 |
| LAHLGFDEVFARMWE  | PUTATIVE CYCLOPROPANE-FATTY-ACYL-PHOSPHOLIPID SYNTHASE UFAA1 NP_854118       | 0.489  | 1.253 |
| GSSAMILAAYHPQQF  | CAB10044.1; SECRETED ANTIGEN 85-B FBPB (85B)                                 | 0.829  | 1.246 |
| ARPMTELVTGKAFPY  | 3-OXOACYL-[ACYL-CARRIER PROTEIN] SYNTHASE 2 KASB CAA94642                    | 0.333  | 1.240 |
| LMWAADVAAMAGYHS  | YP_177963; PPE FAMILY PROTEIN                                                | 0.917  | 1.240 |
| AMMAHAGDMAGYAGT  | CAA16104.1; SECRETED ESAT-6 LIKE PROTEIN ESXR                                | 0.567  | 1.236 |
| RACACLPQHDAFTF   | MYCOBACTERIUM BOVIS ACYL-COA SYNTHASE GENE; U75685                           | 0.627  | 1.236 |
| ANEYADVPEMFRELV  | ALTERNATE RNA POLYMERASE SIGMA FACTOR SIGF CAB07069                          | 1.026  | 1.236 |
| DTGITYQGWQTQWNQ  | CAA16104.1; SECRETED ESAT-6 LIKE PROTEIN ESXR                                | 0.462  | 1.229 |
| APGCWQPIITRDWPA  | MCE-FAMILY PROTEIN MCE1AYP_177701                                            | 0.943  | 1.229 |
| QAQWNQAMEALARAY  | CAA16102.1; ESAT-6 LIKE PROTEIN ESXQ                                         | -0.016 | 1.227 |
| PWDRWLDRDFFGPAAT | CAA17343.1; HEAT SHOCK PROTEIN HSP                                           | 1.331  | 1.224 |
| MEQFVYAYVRSCPGY  | PERIPLASMIC PHOSPHATE-BINDING LIPOPROTEIN PSTS2 YP_177769                    | 0.276  | 1.223 |
| PLLGLHWSWELAIM   | CAB06237.1; CONSERVED HYPOTHETICAL PROTEIN                                   | 0.814  | 1.216 |
| LSPLRPASCRFVPTC  | POSSIBLE HEMOLYSIN CAA16235                                                  | 0.083  | 1.215 |
| LLTENVEAGDIWRMC  | PROBABLE ISOCITRATE DEHYDROGENASE CAA16247                                   | 0.399  | 1.214 |
| CDFYEEQMQDAFETG  | PROBABLE ISOCITRATE DEHYDROGENASE CAA16247                                   | 0.288  | 1.213 |
| GGQVISEEVGLTLEN  | 60 kDa chaperonin 2 P0A521                                                   | 0.788  | 1.213 |
| MADPPTDVPITPCEL  | MTB48 AAK31576                                                               | -0.008 | 1.203 |
| QAWQAQWNQAMEDLV  | CAA17363.1; LOW MOLECULAR WEIGHT PROTEIN ANTIGEN 7 ESXH                      | 0.741  | 1.199 |
| YEEQMQDAFETGVMF  | PROBABLE ISOCITRATE DEHYDROGENASE CAA16247                                   | 0.622  | 1.197 |
| YDDFWDEDGEVMDY   | PPE FAMILY PROTEIN CAE55489                                                  | 0.636  | 1.189 |
| LNVMEEHQVRRVPVI  | HYPOTHETICAL PROTEIN RV2626C NP_217142                                       | -0.015 | 1.188 |
| AVRWPDPWPTTFGYH  | POSSIBLE HEMOLYSIN-LIKE PROTEIN CAA17201                                     | 0.770  | 1.188 |
| AACLKWEGGYVWACK  | CAA17111.1; PROBABLE ISOCITRATE DEHYDROGENASE                                | 1.008  | 1.187 |
| SFAKLREPLEVPGLL  | RNA POLYMERASE BETA-SUBUNIT AAA21416                                         | 0.599  | 1.184 |
| TSEQIVERFGFSEIM  | RNA POLYMERASE BETA-SUBUNIT AAA21416                                         | 0.201  | 1.174 |
| TDSFEWLIGSPRWRE  | RNA POLYMERASE BETA-SUBUNIT AAA21416                                         | 0.779  | 1.173 |
| PKVISRAMVMRTVIS  | POSSIBLE GLYCOSYL TRANSFERASE CAB05419                                       | -0.017 | 1.170 |
| PLPDVPWTRFFGVPR  | POSSIBLE GLYCOSYL TRANSFERASE CAB05418                                       | 0.472  | 1.170 |
| DSMLAAARAWRSLDV  | PPE FAMILY PROTEIN CAE55489                                                  | 0.702  | 1.168 |
| DWDQAYRKPIYDTL   | CAA98382.1; IMMUNOGENIC PROTEIN MPT64                                        | 0.222  | 1.167 |
| YCPAVIAPLMPNRLQ  | CAB10947.1; PROBABLE LIPOPROTEIN LPRJ                                        | 0.191  | 1.162 |
| VLADWDFNIRCFNSP  | POSSIBLE GLYCOSYL TRANSFERASE CAB05419                                       | 1.120  | 1.161 |
| GLAMGDAGGYKAADM  | CAB10044.1; SECRETED ANTIGEN 85-B FBPB (85B)                                 | 0.415  | 1.158 |
| DMTTAVMRPSKTFNA  | PROBABLE ISOCITRATE DEHYDROGENASE CAA16247                                   | 0.101  | 1.152 |
| PEFQRHRDKIVQRCL  | ALTERNATE RNA POLYMERASE SIGMA FACTOR SIGF CAB07069                          | 0.410  | 1.152 |
| CTHYPLAEAAAIRA   | MYCOBACTERIUM BOVIS MYCOCEROSIC ACID SYNTHASE GENE; M95808                   | 0.612  | 1.147 |
| VERQIHEIVRAYEWA  | PPE FAMILY PROTEIN CAE55489                                                  | 0.718  | 1.144 |
| FFVEMRMIDGTSLRA  | TRANSMEMBRANE SERINE/THREONINE-PROTEIN KINASE D PKND                         | 0.016  | 1.141 |

|                  |                                                                   |        |       |
|------------------|-------------------------------------------------------------------|--------|-------|
|                  | NP_215446                                                         |        |       |
| LFNLWGPAFHERRYPN | PERIPLASMIC PHOSPHATE-BINDING LIPOPROTEIN PSTS1 YP_177770         | 0.609  | 1.140 |
| PEQDWLNSEEFDAI   | CAA17111.1; PROBABLE ISOCITRATE DEHYDROGENASE                     | 0.211  | 1.140 |
| QGASLAHFADGWNTF  | MTB48 AAK31576                                                    | 0.787  | 1.137 |
| AMAAAATPYVGWLAA  | PPE FAMILY PROTEIN CAE55334                                       | 0.153  | 1.137 |
| PKVFGSWNLHRATLG  | MYCOBACTERIUM BOVIS MYCOCEROSIC ACID SYNTHASE GENE; M95808        | 0.878  | 1.136 |
| LMEAAKPFVRWLTDL  | PPE FAMILY PROTEIN CAE55489                                       | 0.281  | 1.135 |
| ITPEEGAYAFETLVR  | MYCOBACTERIUM BOVIS MYCOCEROSIC ACID SYNTHASE GENE; M95808        | 0.322  | 1.134 |
| EGTYIHAVVYPGENQ  | CONSERVED HYPOTHETICAL PROTEIN TB18.5CAD93033                     | 0.473  | 1.132 |
| ENAMEQFVYAYVRSC  | PERIPLASMIC PHOSPHATE-BINDING LIPOPROTEIN PSTS2 YP_177769         | 0.158  | 1.132 |
| GFGNATATPSSGFFN  | YP_177963; PPE FAMILY PROTEIN                                     | 0.041  | 1.131 |
| MWLSPNGTIRNILGG  | CAA17111.1; PROBABLE ISOCITRATE DEHYDROGENASE                     | 0.245  | 1.126 |
| LRLMPENRPRTWLAS  | POSSIBLE GLYCOSYL TRANSFERASE CAB05415                            | 0.190  | 1.125 |
| YADVPFMFRELVLGP  | ALTERNATE RNA POLYMERASE SIGMA FACTOR SIGF CAB07069               | 0.021  | 1.119 |
| GPRKSALDEEIIWDL  | CONSERVED HYPOTHETICAL PROTEIN CAB08634                           | 0.665  | 1.119 |
| LGLPPWQPALPRLF   | PPE FAMILY PROTEIN CAE55504                                       | 0.840  | 1.114 |
| AVFNFPNGTHSWEY   | CAB10044.1; SECRETED ANTIGEN 85-B FBPB (85B)                      | 0.451  | 1.113 |
| LPDELSDEVETGLFVP | MYCOBACTERIUM BOVIS MYCOCEROSIC ACID SYNTHASE GENE; M95808        | -0.252 | 1.104 |
| GFGNFGAGSSGWWNQ  | YP_177963; PPE FAMILY PROTEIN                                     | 0.707  | 1.101 |
| VLWSPDVKPPTWHS   | POSSIBLE GLYCOSYL TRANSFERASE CAB05418                            | 0.871  | 1.096 |
| VANNRLWVYCGNGT   | CAB10044.1; SECRETED ANTIGEN 85-B FBPB (85B)                      | 0.625  | 1.095 |
| PVTHIWFYKGVPSRL  | RNA POLYMERASE BETA'-SUBUNIT AAA21417                             | 0.686  | 1.092 |
| SGNFSNGVLWRGDYE  | YP_177963; PPE FAMILY PROTEIN                                     | 0.936  | 1.091 |
| IRLAKCGPWHRGGWD  | POSSIBLE HEMOLYSIN CAA16235                                       | 0.901  | 1.088 |
| VHPSHYGRMCPIETP  | RNA POLYMERASE BETA-SUBUNIT AAA21416                              | 0.195  | 1.086 |
| PFGLFPDWDVAEVA   | PPE FAMILY PROTEIN CAE55504                                       | -0.067 | 1.082 |
| KTVSPHRSPISNMVS  | CAE55371.1; PPE FAMILY PROTEIN                                    | -0.165 | 1.082 |
| PWPTTFGYHEFFHAC  | POSSIBLE HEMOLYSIN-LIKE PROTEIN CAA17201                          | 0.829  | 1.081 |
| QTQWNQALEDLVRAY  | CAA16104.1; SECRETED ESAT-6 LIKE PROTEIN ESXR                     | 0.555  | 1.074 |
| VLFWLDPYRPHENEL  | PROBABLE ISOCITRATE DEHYDROGENASE CAA16247                        | 0.642  | 1.073 |
| NLLGQNAPAIAAAEA  | PPE FAMILY PROTEIN CAE55504                                       | -0.127 | 1.070 |
| WTELAALPDFLGGFA  | CAB06237.1; CONSERVED HYPOTHETICAL PROTEIN                        | 0.500  | 1.064 |
| ATMPYVLELADHGWR  | SECRETED L-ALANINE DEHYDROGENASE ALD CAA15575                     | 0.460  | 1.063 |
| ERFGFSEIMRSTLEK  | RNA POLYMERASE BETA-SUBUNIT AAA21416                              | 0.482  | 1.063 |
| SPTAATLHALHYHQV  | MTB81 (publication)                                               | 0.502  | 1.062 |
| ELMPTYDLPANHEYL  | POSSIBLE GLYCOSYL TRANSFERASE CAB05415                            | 0.818  | 1.061 |
| GRGGMGEVYEAEDTR  | TRANSMEMBRANE SERINE/THREONINE-PROTEIN KINASE D PKND<br>NP_215446 | 0.351  | 1.059 |
| PTWWSLPTDRPIIY   | POSSIBLE GLYCOSYL TRANSFERASE CAB05418                            | 0.683  | 1.057 |
| QDEALYTEDRAWT    | MTB48 AAK31576                                                    | 0.501  | 1.055 |
| GAPWLADLVRSPWG   | MYCOBACTERIUM BOVIS MYCOCEROSIC ACID SYNTHASE GENE; M95808        | 0.505  | 1.053 |
| YNLPANHRYLGPVLW  | POSSIBLE GLYCOSYL TRANSFERASE CAB05418                            | 0.578  | 1.050 |
| WVFSGQGSQWAAMGT  | MYCOBACTERIUM BOVIS MYCOCEROSIC ACID SYNTHASE GENE; M95808        | 0.479  | 1.049 |
| GVSGFNGFAGSSGW   | YP_177963; PPE FAMILY PROTEIN                                     | 0.298  | 1.044 |
| IADIEAYPQWISEYK  | CONSERVED HYPOTHETICAL PROTEIN TB16.3CAD97060                     | 0.681  | 1.042 |
| PSSGFSSMLWGGGSL  | PROBABLE CUTINASE PRECURSOR CFP21 NP_216500                       | 0.448  | 1.038 |
| MAPERFTGDEVITYRA | TRANSMEMBRANE SERINE/THREONINE-PROTEIN KINASE D PKND<br>NP_215446 | 0.332  | 1.036 |
| RSFNRTLTLMDAWA   | PPE FAMILY PROTEIN CAE55489                                       | 0.623  | 1.036 |
| TQAEYAEMWAQDAV   | PPE FAMILY PROTEIN CAE55334                                       | -0.096 | 1.035 |
| ARKPHPSMGEWSMAS  | PROBABLE ISOCITRATE DEHYDROGENASE CAA16247                        | 1.139  | 1.032 |
| AVAVGCAQPACLRAY  | MYCOBACTERIUM BOVIS MYCOCEROSIC ACID SYNTHASE GENE; M95808        | 0.086  | 1.031 |
| FGALPPEINSARMYA  | CAE55371.1; PPE FAMILY PROTEIN                                    | 0.265  | 1.027 |
| DVPWTRFFGVPRVSI  | POSSIBLE GLYCOSYL TRANSFERASE CAB05418                            | 0.438  | 1.025 |
| RAYEWAHDMVPLAQ   | PPE FAMILY PROTEIN CAE55489                                       | 0.730  | 1.021 |
| PTCSQYAVDALTEYG  | POSSIBLE HEMOLYSIN CAA16235                                       | 0.544  | 1.020 |
| GGGMYETGAGGSAPK  | PROBABLE ISOCITRATE DEHYDROGENASE CAA16247                        | 0.825  | 1.020 |
| MTLDRARNVIRMELLA | PROBABLE ISOCITRATE DEHYDROGENASE CAA16247                        | -0.064 | 1.020 |
| DNRGSQFYLAMywaQ  | PROBABLE ISOCITRATE DEHYDROGENASE CAA16247                        | 0.894  | 1.019 |
| ATACEASLDQQRQWI  | MTB48 AAK31576                                                    | 0.575  | 1.017 |
| AAAIAAVEAEYELMW  | YP_177963; PPE FAMILY PROTEIN                                     | 0.352  | 1.015 |
| DVKRFRGFDNWEODA  | MTB48 AAK31576                                                    | 0.767  | 1.015 |
| ANHEYLGPVVLWSPAG | POSSIBLE GLYCOSYL TRANSFERASE CAB05415                            | 0.751  | 1.013 |
| YPLAEADAIRAMSN   | MYCOBACTERIUM BOVIS MYCOCEROSIC ACID SYNTHASE GENE; M95808        | 0.870  | 1.011 |
| VGGQSSFYSDWYSPA  | CAB10044.1; SECRETED ANTIGEN 85-B FBPB (85B)                      | 0.448  | 1.010 |
| MTDTVGQVVLGWKVS  | CAB06500.1; IMMUNOGENIC PROTEIN MPT63                             | -0.044 | 1.009 |

|                  |                                                                              |        |       |
|------------------|------------------------------------------------------------------------------|--------|-------|
| GFPGFPEFPAIPGFP  | CAB06237.1; CONSERVED HYPOTHETICAL PROTEIN                                   | 0.252  | 1.009 |
| GSPLFPDLPSFPGFP  | CAB06237.1; CONSERVED HYPOTHETICAL PROTEIN                                   | 0.208  | 1.008 |
| AEYGEWMAQDAAAMF  | CAE55371.1; PPE FAMILY PROTEIN                                               | 0.504  | 1.008 |
| KAYDGMFKDEFERVY  | CAA17111.1; PROBABLE ISOCITRATE DEHYDROGENASE                                | 0.806  | 1.008 |
| AGSVDELVPRSLHWL  | PUTATIVE CYCLOPROPANE-FATTY-ACYL-PHOSPHOLIPID SYNTHASE UFAA1 NP_854118       | 0.537  | 1.005 |
| ATLFDPREQPVCDGA  | MYCOBACTERIUM BOVIS MYCOCEROSIC ACID SYNTHASE GENE; M95808                   | 0.538  | 1.005 |
| PGQGAYAAANSWVDV  | MYCOBACTERIUM BOVIS MYCOCEROSIC ACID SYNTHASE GENE; M95808                   | 0.684  | 1.003 |
| GVRLAFVCAVDMPYL  | CAA16030.1; PROBABLE MOLYBDOPTERIN-GUANINE DINUCLEOTIDE BIOSYNTHESIS PROTEIN | 0.210  | 0.998 |
| EHLIDDMAACLKW    | CAA17111.1; PROBABLE ISOCITRATE DEHYDROGENASE                                | 0.485  | 0.996 |
| DEARVEEFNLKKMWL  | CAA17111.1; PROBABLE ISOCITRATE DEHYDROGENASE                                | 0.881  | 0.995 |
| VRRRHGLSSLGWNLC  | POSSIBLE GLYCOSYL TRANSFERASE CAB05415                                       | 0.850  | 0.995 |
| PVAVIGMGCRLPGGI  | MYCOBACTERIUM BOVIS MYCOCEROSIC ACID SYNTHASE GENE; M95808                   | 0.039  | 0.994 |
| WRSLDVENTAVQRSF  | PPE FAMILY PROTEIN CAE55489                                                  | 0.771  | 0.994 |
| FAAFPSFAGLRPTFD  | CAA17245.1; HEAT SHOCK PROTEIN HSPX                                          | -0.179 | 0.991 |
| EWAHHDMPVLAQIYN  | PPE FAMILY PROTEIN CAE55489                                                  | 0.640  | 0.991 |
| ATWLEVPLPPGVLRW  | HYPOTHETICAL PROTEIN RV2623 NP_217139                                        | 0.276  | 0.988 |
| LIGPEQDWNSEEF    | CAA17111.1; PROBABLE ISOCITRATE DEHYDROGENASE                                | 0.866  | 0.987 |
| AIANAYWSPQARRRF  | POSSIBLE GLYCOSYL TRANSFERASE CAB05418                                       | 0.344  | 0.987 |
| DIRQWSYGEVKKPET  | RNA POLYMERASE BETA'-SUBUNIT AAA21417                                        | 0.162  | 0.983 |
| FEWLIGSPRWRESAA  | RNA POLYMERASE BETA'-SUBUNIT AAA21416                                        | 0.545  | 0.972 |
| VVLPWDGRNHVLA    | CAA16030.1; PROBABLE MOLYBDOPTERIN-GUANINE DINUCLEOTIDE BIOSYNTHESIS PROTEIN | 0.128  | 0.968 |
| IAATQAEYAEWMAQD  | PPE FAMILY PROTEIN CAE55334                                                  | 0.674  | 0.966 |
| QPHDPAFTFMDYEQD  | MYCOBACTERIUM BOVIS ACYL-COA SYNTHASE GENE; U75685                           | 0.558  | 0.965 |
| AMAAAAAPYAGWLGS  | YP_177963; PPE FAMILY PROTEIN                                                | 0.247  | 0.963 |
| FRMELLSLPQDEWAG  | MYCOBACTERIUM BOVIS MYCOCEROSIC ACID SYNTHASE GENE; M95808                   | 0.682  | 0.958 |
| EGLTNKQIADRMFLA  | TWO COMPONENT TRANSCRIPTIONAL REGULATORY PROTEIN DEVR NP_217649              | -0.050 | 0.957 |
| AKCGPWHRGGWDPPI  | POSSIBLE HEMOLYSIN CAA16235                                                  | 0.528  | 0.947 |
| LMASDFHAFSAAPNF  | MYCOBACTERIUM BOVIS ACYL-COA SYNTHASE GENE; U75685                           | 0.398  | 0.946 |
| NNMAQTDSAVGSSWA  | PUTATIVE ESAT-6 LIKE PROTEIN ESXN YP_177838                                  | 0.208  | 0.943 |
| GVYKVKGLEKIPLL   | CAB06237.1; CONSERVED HYPOTHETICAL PROTEIN                                   | 0.164  | 0.940 |
| EGVTGHQVGDVRVGGF | MYCOBACTERIUM BOVIS MYCOCEROSIC ACID SYNTHASE GENE; M95808                   | 0.481  | 0.934 |
| MSTVLSRRLWENAGS  | 3-OXOACYL-[ACYL-CARRIER PROTEIN] SYNTHASE 2 KASB CAA94642                    | 0.278  | 0.928 |
| TDLCVQLSEVERQIH  | PPE FAMILY PROTEIN CAE55489                                                  | 0.673  | 0.927 |
| AVPQVGSQFGPYQLL  | TRANSMEMBRANE SERINE/THREONINE-PROTEIN KINASE D PKND NP_215446               | 0.415  | 0.926 |
| WRGDYEGWLGLSGGS  | YP_177963; PPE FAMILY PROTEIN                                                | 0.615  | 0.919 |
| MRLEDEMKEGRYEV   | CAA17245.1; HEAT SHOCK PROTEIN HSPX                                          | 0.127  | 0.915 |
| RYRVLADWDFNIRCF  | POSSIBLE GLYCOSYL TRANSFERASE CAB05419                                       | 1.286  | 0.915 |
| QIWAQDVAAAMFGYHS | PPE FAMILY PROTEIN CAE55504                                                  | 0.270  | 0.912 |
| NARTADGINRVLWQ   | CAB06500.1; IMMUNOGENIC PROTEIN MPT63                                        | 0.402  | 0.909 |
| YAQQGQQQTYSQQFDW | CAA17582.1; PROBABLE SERINE PROTEASE PEPD                                    | 0.794  | 0.908 |
| GFPEFPAIPGFPALP  | CAB06237.1; CONSERVED HYPOTHETICAL PROTEIN                                   | -0.014 | 0.904 |
| HPTYEDIVGLERLYA  | MTB48 AAK31576                                                               | 0.085  | 0.900 |
| SPYAQRFRPLPDVIV  | POSSIBLE GLYCOSYL TRANSFERASE CAB05415                                       | 0.591  | 0.896 |
| HDYGEINGQFFVEMR  | TRANSMEMBRANE SERINE/THREONINE-PROTEIN KINASE D PKND NP_215446               | 0.239  | 0.894 |
| RIFYKDAFAKHQELF  | PROBABLE ISOCITRATE DEHYDROGENASE CAA16247                                   | 0.972  | 0.891 |
| LAAPVTHIWYFKGVP  | RNA POLYMERASE BETA'-SUBUNIT AAA21417                                        | 0.321  | 0.891 |
| QAITAATAHATAWYG  | MYCOBACTERIUM BOVIS MYCOCEROSIC ACID SYNTHASE GENE; M95808                   | 0.501  | 0.890 |
| QAQYVAQLHVWARRE  | MTB48 AAK31576                                                               | 0.265  | 0.888 |
| DEALYTEDRAWTEAV  | MTB48 AAK31576                                                               | 0.270  | 0.885 |
| LQGDVVKRFRGFDNWE | MTB48 AAK31576                                                               | 0.707  | 0.884 |
| SMYSYPAMTANVGDM  | CAA16102.1; ESAT-6 LIKE PROTEIN ESXQ                                         | 0.107  | 0.884 |
| PSKFRMELLSLPQDE  | MYCOBACTERIUM BOVIS MYCOCEROSIC ACID SYNTHASE GENE; M95808                   | 0.908  | 0.884 |
| IDMDAYRQFLTEIGY  | MTB81 (publication)                                                          | -0.107 | 0.883 |
| GPVVMQLMEAAKPFV  | PPE FAMILY PROTEIN CAE55489                                                  | -0.490 | 0.883 |
| IHELNVNIGPFRIPI  | YP_177963; PPE FAMILY PROTEIN                                                | -0.067 | 0.882 |
| LNGKVLAAAMYQGTIK | PERIPLASMIC PHOSPHATE-BINDING LIPOPROTEIN PSTS1 YP_177770                    | 0.270  | 0.876 |
| FACDPRFNKLLGPLP  | POSSIBLE GLYCOSYL TRANSFERASE CAB05418                                       | 0.204  | 0.873 |
| DWYSPACGKAGCQTY  | CAB10044.1; SECRETED ANTIGEN 85-B FBPB (85B)                                 | 0.388  | 0.872 |
| QGWTQWQNALEDLV   | CAA16104.1; SECRETED ESAT-6 LIKE PROTEIN ESXR                                | 0.262  | 0.871 |
| LVVKGPNAGSRFLL   | CAB01474.1; CONSERVED HYPOTHETICAL PROTEIN CFP17                             | 0.932  | 0.869 |
| LVALHAWSDVDVSEW  | HYPOTHETICAL PROTEIN RV2623 NP_217139                                        | 0.460  | 0.868 |

|                  |                                                                        |        |       |
|------------------|------------------------------------------------------------------------|--------|-------|
| PVIGLPSNMDQHLNM  | POSSIBLE GLYCOSYL TRANSFERASE CAB05418                                 | 0.275  | 0.866 |
| ITYQGWQTQWNQALE  | CAA16104.1; SECRETED ESAT-6 LIKE PROTEIN ESXR                          | 0.701  | 0.866 |
| TLTDALKSHGPQGTE  | MYCOBACTERIUM BOVIS MYCOCEROSIC ACID SYNTHASE GENE; M95808             | 0.732  | 0.863 |
| HPIVFGHAVRIFYKD  | PROBABLE ISOCITRATE DEHYDROGENASE CAA16247                             | 0.203  | 0.863 |
| AQDVAAMFGYHSAAS  | PPE FAMILY PROTEIN CAE55504                                            | 0.051  | 0.859 |
| DIPGMSLFDIHELVN  | YP_177963; PPE FAMILY PROTEIN                                          | 0.592  | 0.856 |
| KIHARSTGPYSMITQ  | RNA POLYMERASE BETA-SUBUNIT AAA21416                                   | -0.161 | 0.855 |
| IAAVEAEYELMWAAD  | YP_177963; PPE FAMILY PROTEIN                                          | 0.296  | 0.854 |
| QGIEGTIHAVVYPG   | CONSERVED HYPOTHETICAL PROTEIN TB18.5CAD93033                          | 0.046  | 0.853 |
| AQQLVLSADNMREYL  | MTB48 AAK31576                                                         | 0.181  | 0.848 |
| KDLVDGAPKPLEKV   | CAB07109.1; PROBABLE 50S RIBOSOMAL PROTEIN L7/L12 RPLL                 | -0.182 | 0.842 |
| YQEINFCKTNGQFD   | PROBABLE ISOCITRATE DEHYDROGENASE CAA16247                             | 0.674  | 0.839 |
| KPEKDGLFCEKIFGP  | RNA POLYMERASE BETA'-SUBUNIT AAA21417                                  | 0.518  | 0.839 |
| VWYTATILHNAGVTA  | POSSIBLE HEMOLYSIN-LIKE PROTEIN CAA17201                               | -0.086 | 0.839 |
| EIMITPEEGAYAFET  | MYCOBACTERIUM BOVIS MYCOCEROSIC ACID SYNTHASE GENE; M95808             | 0.222  | 0.838 |
| RRFPLPDVPWTRFFG  | POSSIBLE GLYCOSYL TRANSFERASE CAB05418                                 | 0.709  | 0.838 |
| DWLNSEEFDAIADN   | CAA17111.1; PROBABLE ISOCITRATE DEHYDROGENASE                          | -0.052 | 0.827 |
| TAVQGIEGTIHAVY   | CONSERVED HYPOTHETICAL PROTEIN TB18.5CAD93033                          | -0.084 | 0.825 |
| LTTYILLPSQDLPLL  | PPE FAMILY PROTEIN CAE55504                                            | 0.064  | 0.823 |
| AFEWYYQSGLSIVMP  | CAB10044.1; SECRETED ANTIGEN 85-B FBPB (85B)                           | -0.019 | 0.821 |
| PDFWKPPPTGSPPLFP | CAB06237.1; CONSERVED HYPOTHETICAL PROTEIN                             | -0.017 | 0.820 |
| NTPAFEWYYQSGLSI  | CAB10044.1; SECRETED ANTIGEN 85-B FBPB (85B)                           | 0.288  | 0.819 |
| ADLDQEYDDFWDEDG  | PPE FAMILY PROTEIN CAE55489                                            | 0.811  | 0.815 |
| QQRQWILHMAKLSAA  | MTB48 AAK31576                                                         | -0.126 | 0.814 |
| IGRHGLIGFGESYMA  | PUTATIVE CYCLOPROPANE-FATTY-ACYL-PHOSPHOLIPID SYNTHASE UFAA1 NP_854118 | 0.209  | 0.809 |
| SDIFLDDVTVSRRHA  | CAB01474.1; CONSERVED HYPOTHETICAL PROTEIN CFP17                       | -0.048 | 0.809 |
| AEGDTVIYSKYGGTE  | CAB01005.1; 10 KDA CHAPERONIN GROES                                    | 0.255  | 0.806 |
| YNEWSFAQAQHLTMA  | PERIPLASMIC PHOSPHATE-BINDING LIPOPROTEIN PSTS3 YP_177768              | 0.122  | 0.803 |
| AFNSGSFNNGALWTG  | YP_177963; PPE FAMILY PROTEIN                                          | 0.148  | 0.797 |
| EFNLKKMWLSPNGTI  | CAA17111.1; PROBABLE ISOCITRATE DEHYDROGENASE                          | 0.052  | 0.793 |
| SMAGSSAMILAAYHP  | CAB10044.1; SECRETED ANTIGEN 85-B FBPB (85B)                           | 0.330  | 0.787 |
| LFCEKIFGPTRDWEC  | RNA POLYMERASE BETA'-SUBUNIT AAA21417                                  | 0.183  | 0.787 |
| SAERCGSPAOWLPTV  | PERIPLASMIC PHOSPHATE-BINDING LIPOPROTEIN PSTS2 YP_177769              | 0.132  | 0.781 |
| IWKLIKDMLILPYLD  | CAA17111.1; PROBABLE ISOCITRATE DEHYDROGENASE                          | 0.190  | 0.778 |
| LPTWTELAALPDFLG  | CAB06237.1; CONSERVED HYPOTHETICAL PROTEIN                             | 0.071  | 0.778 |
| GFFNTGAGGSGSGFN  | YP_177963; PPE FAMILY PROTEIN                                          | -0.052 | 0.776 |
| ARASFSYGLNAKWVP  | CAA17111.1; PROBABLE ISOCITRATE DEHYDROGENASE                          | 0.478  | 0.776 |
| PANHRYLGPVLWSPD  | POSSIBLE GLYCOSYL TRANSFERASE CAB05418                                 | 0.522  | 0.776 |
| SDTVRDLIARWEQRD  | MYCOBACTERIUM BOVIS MYCOCEROSIC ACID SYNTHASE GENE; M95808             | 0.000  | 0.774 |
| RCLPLADHIARRFEG  | ALTERNATE RNA POLYMERASE SIGMA FACTOR SIGF CAB07069                    | 0.174  | 0.773 |
| SFPGFPGFPEFFAIP  | CAB06237.1; CONSERVED HYPOTHETICAL PROTEIN                             | 0.062  | 0.771 |
| LSSATDEPEPHWGPF  | PPE FAMILY PROTEIN CAE55334                                            | 0.443  | 0.770 |
| FKDEFERYEEEFKA   | CAA17111.1; PROBABLE ISOCITRATE DEHYDROGENASE                          | 0.552  | 0.767 |
| HLKLNKGVLAAMYQG  | PERIPLASMIC PHOSPHATE-BINDING LIPOPROTEIN PSTS1 YP_177770              | 0.206  | 0.766 |
| SSGLMAVHLACRSLH  | MYCOBACTERIUM BOVIS MYCOCEROSIC ACID SYNTHASE GENE; M95808             | 0.001  | 0.763 |
| VGWANMGLGNIGFGN  | YP_177963; PPE FAMILY PROTEIN                                          | 0.861  | 0.763 |
| AFAKHQELFDDLGVN  | PROBABLE ISOCITRATE DEHYDROGENASE CAA16247                             | 0.635  | 0.761 |
| NFRWGGAFDLDRLLF  | POSSIBLE GLYCOSYL TRANSFERASE CAB05419                                 | 0.363  | 0.760 |
| MLATRHTQTWIKQYI  | PUTATIVE CYCLOPROPANE-FATTY-ACYL-PHOSPHOLIPID SYNTHASE UFAA1 NP_854118 | -0.143 | 0.760 |
| DMAQTFTSIAISMYC  | CONSERVED HYPOTHETICAL PROTEIN CAA15739                                | 0.273  | 0.759 |
| SCVYATASRWGGPPV  | POSSIBLE GLYCOSYL TRANSFERASE CAB05415                                 | 0.179  | 0.758 |
| QLKTDAKLLSSILTY  | CAA98350.1; CELL SURFACE LIPOPROTEIN MPT83                             | -0.236 | 0.756 |
| DAATAQTLQAFLHWA  | PERIPLASMIC PHOSPHATE-BINDING LIPOPROTEIN PSTS1 YP_177770              | 0.607  | 0.754 |
| VVELDGDDEMTRVIWK | CAA17111.1; PROBABLE ISOCITRATE DEHYDROGENASE                          | 0.208  | 0.753 |
| DGMFKDEFERYEEEE  | CAA17111.1; PROBABLE ISOCITRATE DEHYDROGENASE                          | 0.362  | 0.752 |
| SGNFSNGILWRGNYE  | YP_177963; PPE FAMILY PROTEIN                                          | 1.150  | 0.752 |
| QDDYNGWDINTPAFE  | CAB10044.1; SECRETED ANTIGEN 85-B FBPB (85B)                           | 0.142  | 0.750 |
| GPGSASLVAAQMWD   | CAE55371.1; PPE FAMILY PROTEIN                                         | 0.179  | 0.744 |
| GLGLPPPWPQALPRL  | PPE FAMILY PROTEIN CAE55504                                            | 0.174  | 0.741 |
| RKPITYDTLWQADTD  | CAA98382.1; IMMUNOGENIC PROTEIN MPT64                                  | 0.344  | 0.740 |
| EMIEAVGYRSWPRYF  | PUTATIVE CYCLOPROPANE-FATTY-ACYL-PHOSPHOLIPID SYNTHASE UFAA1 NP_854118 | 0.363  | 0.739 |
| FPHHPHTVPSEEVN   | POSSIBLE GLYCOSYL TRANSFERASE CAB05418                                 | 0.486  | 0.735 |
| SITYNEWSFAQAQHL  | PERIPLASMIC PHOSPHATE-BINDING LIPOPROTEIN PSTS3 YP_177768              | 0.443  | 0.734 |

|                  |                                                                        |        |       |
|------------------|------------------------------------------------------------------------|--------|-------|
| GMRFDKGYISGYFVT  | 60 kDa chaperonin 2 P0A521                                             | -0.049 | 0.733 |
| AYVRSCPGYTLDYNA  | PERIPLASMIC PHOSPHATE-BINDING LIPOPROTEIN PSTS2 YP_177769              | -0.064 | 0.729 |
| MGTQLLASEPVFAAT  | MYCOBACTERIUM BOVIS MYCOCEROSIC ACID SYNTHASE GENE; M95808             | -0.151 | 0.728 |
| NDHTPKRVAVSSFGM  | MYCOBACTERIUM BOVIS MYCOCEROSIC ACID SYNTHASE GENE; M95808             | 0.024  | 0.727 |
| HAVRIFYKDAFAKHQ  | PROBABLE ISOCITRATE DEHYDROGENASE CAA16247                             | 0.261  | 0.725 |
| ERYPEWNEGKGAUV   | CONSERVED HYPOTHETICAL PROTEIN TB18.5CAD93033                          | 0.561  | 0.720 |
| SIMAIVADIERYPEW  | CONSERVED HYPOTHETICAL PROTEIN TB18.5CAD93033                          | 0.513  | 0.717 |
| GQILETHLGWCAHSG  | RNA POLYMERASE BETA-SUBUNIT AAA21416                                   | 0.350  | 0.717 |
| SDFVKKFEETFEVTA  | CAB07109.1; PROBABLE 50S RIBOSOMAL PROTEIN L7/L12 RPLL                 | -0.106 | 0.715 |
| YGHWWPAVAVGCAQP  | MYCOBACTERIUM BOVIS MYCOCEROSIC ACID SYNTHASE GENE; M95808             | 0.028  | 0.707 |
| GKPTSTNPIASIFAW  | CAA17111.1; PROBABLE ISOCITRATE DEHYDROGENASE                          | -0.165 | 0.707 |
| GLDQIENREVLRLPL  | ALTERNATE RNA POLYMERASE SIGMA FACTOR SIGF CAB07069                    | 0.417  | 0.705 |
| QDPEGWGKSPGFGTT  | PERIPLASMIC PHOSPHATE-BINDING LIPOPROTEIN PSTS1 YP_177770              | -0.111 | 0.705 |
| ASRANEYADVPEMFR  | ALTERNATE RNA POLYMERASE SIGMA FACTOR SIGF CAB07069                    | 0.668  | 0.704 |
| SRACQGDGLGMSHQDW | CAA16102.1; ESAT-6 LIKE PROTEIN ESXQ                                   | 0.582  | 0.699 |
| VDDKIARSTGPYSM   | RNA POLYMERASE BETA-SUBUNIT AAA21416                                   | 0.136  | 0.697 |
| FLFTQYLSKQDPEGW  | PERIPLASMIC PHOSPHATE-BINDING LIPOPROTEIN PSTS1 YP_177770              | 0.126  | 0.694 |
| GSLSALLDPSQGMGP  | CAB10044.1; SECRETED ANTIGEN 85-B FBPB (85B)                           | 0.048  | 0.691 |
| VMQVISRSEYRQAAA  | POSSIBLE GLYCOSYL TRANSFERASE CAB05415                                 | 0.267  | 0.691 |
| LYPLFNLWGPAFHER  | PERIPLASMIC PHOSPHATE-BINDING LIPOPROTEIN PSTS1 YP_177770              | 0.297  | 0.690 |
| AAPGLAARRRRLFV   | POSSIBLE GLYCOSYL TRANSFERASE CAB05415                                 | 0.373  | 0.689 |
| YIVKPKMHGPAEVAF  | MTB81 (publication)                                                    | 0.236  | 0.687 |
| SRRRLRWSWLLSVL   | CAB09453.1; PROBABLE SERINE PROTEASE PEPA                              | -0.110 | 0.687 |
| VMFSLHVKATMMKVS  | PROBABLE ISOCITRATE DEHYDROGENASE CAA16247                             | -0.230 | 0.687 |
| GAYAAANSWVDVFAH  | MYCOBACTERIUM BOVIS MYCOCEROSIC ACID SYNTHASE GENE; M95808             | 0.424  | 0.687 |
| EQAGLRGLLRVISSE  | MYCOBACTERIUM BOVIS MYCOCEROSIC ACID SYNTHASE GENE; M95808             | -0.018 | 0.686 |
| VRVNFQELMSGYFAD  | MYCOBACTERIUM BOVIS ACYL-COA SYNTHASE GENE; U75685                     | 0.445  | 0.686 |
| RFRGFDNWEGDAATA  | MTB48 AAK31576                                                         | 0.532  | 0.685 |
| NDLFAAFLDEMTYS   | PUTATIVE CYCLOPROPANE-FATTY-ACYL-PHOSPHOLIPID SYNTHASE UFAA1 NP_854118 | -0.021 | 0.684 |
| LSEVERQIHEIVRAY  | PPE FAMILY PROTEIN CAE55489                                            | 0.296  | 0.684 |
| SYPAMTANVGDMAGY  | CAA16102.1; ESAT-6 LIKE PROTEIN ESXQ                                   | -0.131 | 0.683 |
| ARFITPVHPGYTATF  | PPE FAMILY PROTEIN CAE55504                                            | 0.525  | 0.683 |
| MSVAALAGMRREQPL  | MYCOBACTERIUM BOVIS MYCOCEROSIC ACID SYNTHASE GENE; M95808             | 0.227  | 0.679 |
| WDGLAEELHAAAGSF  | PPE FAMILY PROTEIN CAE55504                                            | 0.679  | 0.678 |
| MSDAVPQVGSQFGPY  | TRANSMEMBRANE SERINE/THREONINE-PROTEIN KINASE D PKND NP_215446         | 0.332  | 0.676 |
| YKDAFAKHQELFDDL  | PROBABLE ISOCITRATE DEHYDROGENASE CAA16247                             | 0.412  | 0.676 |
| DRVGGFSEGGCWRTF  | MYCOBACTERIUM BOVIS MYCOCEROSIC ACID SYNTHASE GENE; M95808             | 0.413  | 0.676 |
| GNKASFLDQVHFQPL  | PERIPLASMIC PHOSPHATE-BINDING LIPOPROTEIN PSTS1 YP_177770              | 0.231  | 0.674 |
| RTLRYIAADRILN    | POSSIBLE GLYCOSYL TRANSFERASE CAB05418                                 | -0.085 | 0.673 |
| QLHVWARREHPTYED  | MTB48 AAK31576                                                         | 0.064  | 0.672 |
| RPWHIGLYGNAGGLG  | PPE FAMILY PROTEIN CAE55334                                            | 0.232  | 0.669 |
| GVPSRLGYLLDLAPK  | RNA POLYMERASE BETA-SUBUNIT AAA21417                                   | -0.319 | 0.666 |
| RMGHIELAAPVTHIW  | RNA POLYMERASE BETA-SUBUNIT AAA21417                                   | 0.099  | 0.665 |
| GHGLNAQTGVYEDLL  | 60 kDa chaperonin 2 P0A521                                             | 0.177  | 0.664 |
| LAATMEQTYGVRPGA  | MYCOBACTERIUM BOVIS MYCOCEROSIC ACID SYNTHASE GENE; M95808             | -0.043 | 0.664 |
| RVNPFQFIETPYRKV  | RNA POLYMERASE BETA-SUBUNIT AAA21416                                   | 0.334  | 0.662 |
| IEAYPQWISEYKEVE  | CONSERVED HYPOTHETICAL PROTEIN TB16.3CAD97060                          | 0.120  | 0.662 |
| GDFYAGEKSMTLDR   | PROBABLE ISOCITRATE DEHYDROGENASE CAA16247                             | 0.319  | 0.661 |
| AGNVYVTSEGMYGRV  | TRANSMEMBRANE SERINE/THREONINE-PROTEIN KINASE D PKND NP_215446         | -0.077 | 0.660 |
| RGPGQMLGGLPVGQM  | CAE55371.1; PPE FAMILY PROTEIN                                         | -0.095 | 0.659 |
| DLVRRSPWGEMFAST  | MYCOBACTERIUM BOVIS MYCOCEROSIC ACID SYNTHASE GENE; M95808             | 0.111  | 0.659 |
| SRLGYLLDLAPKLE   | RNA POLYMERASE BETA-SUBUNIT AAA21417                                   | -0.156 | 0.658 |
| TDGSITYNEWSFAVG  | PERIPLASMIC PHOSPHATE-BINDING LIPOPROTEIN PSTS2 YP_177769              | -0.032 | 0.654 |
| QPTPAWTELAQAQR   | PUTATIVE CYCLOPROPANE-FATTY-ACYL-PHOSPHOLIPID SYNTHASE UFAA1 NP_854118 | 0.017  | 0.650 |
| VYLLDGLRAQDDYNG  | CAB10044.1; SECRETED ANTIGEN 85-B FBPB (85B)                           | 0.155  | 0.649 |
| ALVSWLPHYHDMGLV  | MYCOBACTERIUM BOVIS ACYL-COA SYNTHASE GENE; U75685                     | 0.509  | 0.648 |
| RPGLPVEYLQVPSPS  | CAB10044.1; SECRETED ANTIGEN 85-B FBPB (85B)                           | -0.068 | 0.648 |
| YEDIVGLERLYAENP  | MTB48 AAK31576                                                         | 0.179  | 0.648 |
| RVGFQPHVENALRLM  | POSSIBLE GLYCOSYL TRANSFERASE CAB05415                                 | -0.026 | 0.645 |
| EQVLAERLAGWQERY  | HYPOTHETICAL PROTEIN RV2623 NP_217139                                  | 0.595  | 0.645 |
| GDFQHTTEEAIRMNC  | CONSERVED HYPOTHETICAL PROTEIN CAB08634                                | 0.119  | 0.640 |
| QLELTEGMRFDKGYI  | 60 kDa chaperonin 2 P0A521                                             | 0.312  | 0.640 |

|                  |                                                                              |        |       |
|------------------|------------------------------------------------------------------------------|--------|-------|
| KIRAWGRRLMIGTAA  | CAB10044.1; SECRETED ANTIGEN 85-B FBPB (85B)                                 | 0.093  | 0.634 |
| TIPEFPIHWTSTGGI  | YP_177963; PPE FAMILY PROTEIN                                                | 0.782  | 0.634 |
| ELSDVETGLFVPQAV  | MYCOBACTERIUM BOVIS MYCOCEROSIC ACID SYNTHASE GENE; M95808                   | -0.213 | 0.631 |
| QLLRLLGRGGMGEVY  | TRANSMEMBRANE SERINE/THREONINE-PROTEIN KINASE D PKND NP_215446               | -0.411 | 0.628 |
| AITNTARPWHLGLY   | PPE FAMILY PROTEIN CAE55334                                                  | 0.568  | 0.627 |
| SLAHFADGWNTFNLT  | MTB48 AAK31576                                                               | 0.385  | 0.625 |
| RVEEFNLKMMWLSPN  | CAA17111.1; PROBABLE ISOCITRATE DEHYDROGENASE                                | 0.196  | 0.622 |
| VHIDQIDIPGMSLFD  | YP_177963; PPE FAMILY PROTEIN                                                | 0.049  | 0.622 |
| VFGHAVRIFYKDAFA  | PROBABLE ISOCITRATE DEHYDROGENASE CAA16247                                   | 0.031  | 0.621 |
| ILYAVRWDPWPPTTF  | POSSIBLE HEMOLYSIN-LIKE PROTEIN CAA17201                                     | 0.361  | 0.620 |
| TRARISGMPVLFWLD  | PROBABLE ISOCITRATE DEHYDROGENASE CAA16247                                   | -0.174 | 0.617 |
| PTPGSPLFPDLPSFP  | CAB06237.1; CONSERVED HYPOTHETICAL PROTEIN                                   | -0.168 | 0.617 |
| IGGILYAVRWDPWP   | POSSIBLE HEMOLYSIN-LIKE PROTEIN CAA17201                                     | 0.068  | 0.615 |
| ALEDLVRAYQSMSGT  | CAA16104.1; SECRETED ESAT-6 LIKE PROTEIN ESXR                                | -0.170 | 0.615 |
| SLDQQRQWILHMAKL  | MTB48 AAK31576                                                               | 0.256  | 0.614 |
| APIYEILHDAKERAH  | CAB08889.1; IRON-REGULATED CONSERVED HYPOTHETICAL PROTEIN                    | 0.571  | 0.613 |
| FSNGILWRGNYEGLF  | YP_177963; PPE FAMILY PROTEIN                                                | 0.780  | 0.613 |
| LNWVRRRHGLSSLGW  | POSSIBLE GLYCOSYL TRANSFERASE CAB05415                                       | 0.295  | 0.613 |
| AVVEDATLTNITDEL  | MYCOBACTERIUM BOVIS MYCOCEROSIC ACID SYNTHASE GENE; M95808                   | 0.182  | 0.613 |
| VDVSEWPGIDWPATQ  | HYPOTHETICAL PROTEIN RV2623 NP_217139                                        | 0.124  | 0.613 |
| RVVKLAAGSKTQTVL  | TRANSMEMBRANE SERINE/THREONINE-PROTEIN KINASE D PKND NP_215446               | -0.219 | 0.612 |
| LAAAAWDGLAEELG   | YP_177963; PPE FAMILY PROTEIN                                                | 0.357  | 0.607 |
| NITDELIDRDWSPKV  | MYCOBACTERIUM BOVIS MYCOCEROSIC ACID SYNTHASE GENE; M95808                   | 0.377  | 0.606 |
| FACDPRYNQLLGPLP  | POSSIBLE GLYCOSYL TRANSFERASE CAB05415                                       | -0.015 | 0.602 |
| RAYHAMSSTHEANTM  | CAA17363.1; LOW MOLECULAR WEIGHT PROTEIN ANTIGEN 7 ESXH                      | -0.078 | 0.601 |
| ETMTYSCAMFTDLLA  | PUTATIVE CYCLOPROPANE-FATTY-ACYL-PHOSPHOLIPID SYNTHASE UFAA1 NP_854118       | 0.159  | 0.598 |
| DVLAAGDFWGGAGSV  | PUTATIVE ESAT-6 LIKE PROTEIN ESXN YP_177838                                  | 0.461  | 0.596 |
| QSLTKLAAAWGGSGS  | CAE55648                                                                     | 0.232  | 0.595 |
| FDWRYPPSPPPQPTQ  | CAA17582.1; PROBABLE SERINE PROTEASE PEPD                                    | 0.074  | 0.594 |
| LAERLAGWQERYPNV  | HYPOTHETICAL PROTEIN RV2623 NP_217139                                        | 0.249  | 0.591 |
| DPTQQIPKLVANNT   | CAB10044.1; SECRETED ANTIGEN 85-B FBPB (85B)                                 | -0.037 | 0.591 |
| SRYEVHFACDPRFNK  | POSSIBLE GLYCOSYL TRANSFERASE CAB05418                                       | 0.410  | 0.590 |
| GERKMSALVDASDAL  | CAA16030.1; PROBABLE MOLYBDOPTERIN-GUANINE DINUCLEOTIDE BIOSYNTHESIS PROTEIN | 0.289  | 0.589 |
| FLAEGGEIMITPEEG  | MYCOBACTERIUM BOVIS MYCOCEROSIC ACID SYNTHASE GENE; M95808                   | 0.008  | 0.589 |
| YRPVAGDFTPAAEIV  | CAA17343.1; HEAT SHOCK PROTEIN HSP                                           | -0.033 | 0.589 |
| MVPLAQIYNNAERQ   | PPE FAMILY PROTEIN CAE55489                                                  | 0.497  | 0.587 |
| IMGASITSDGFHMVA  | 3-OXOACYL-[ACYL-CARRIER PROTEIN] SYNTHASE 2 KASB CAA94642                    | 0.203  | 0.586 |
| NFDDSI AFLAAQELI | MTB81 (publication)                                                          | 0.588  | 0.581 |
| NATATPSSGFFNSGA  | YP_177963; PPE FAMILY PROTEIN                                                | -0.031 | 0.581 |
| TRYSSAYELEGAVKR  | SECRETED L-ALANINE DEHYDROGENASE ALD CAA15575                                | 0.048  | 0.580 |
| LSGSEEDETAWRNGD  | MYCOBACTERIUM BOVIS MYCOCEROSIC ACID SYNTHASE GENE; M95808                   | 0.481  | 0.579 |
| SLDMSVAALAGMRRE  | MYCOBACTERIUM BOVIS MYCOCEROSIC ACID SYNTHASE GENE; M95808                   | -0.024 | 0.578 |
| NFVRSSNLKFQDAYN  | CAB10044.1; SECRETED ANTIGEN 85-B FBPB (85B)                                 | 0.290  | 0.578 |
| TPKRVAVSSFGMSGT  | MYCOBACTERIUM BOVIS MYCOCEROSIC ACID SYNTHASE GENE; M95808                   | -0.046 | 0.577 |
| WSVKVPRRLKELHLR  | ALTERNATE RNA POLYMERASE SIGMA FACTOR SIGF CAB07069                          | 0.107  | 0.576 |
| AAQVRVAAAAYETAY  | CAE55371.1; PPE FAMILY PROTEIN                                               | -0.083 | 0.575 |
| VDELVPRSLHWLRPI  | PUTATIVE CYCLOPROPANE-FATTY-ACYL-PHOSPHOLIPID SYNTHASE UFAA1 NP_854118       | 0.352  | 0.573 |
| PDIPGLPDFKWPPTP  | CAB06237.1; CONSERVED HYPOTHETICAL PROTEIN                                   | -0.127 | 0.571 |
| NLCRIFTDGDHTLYA  | POSSIBLE GLYCOSYL TRANSFERASE CAB05415                                       | 0.399  | 0.568 |
| LRCLILTSYTSDEAM  | TWO COMPONENT TRANSCRIPTIONAL REGULATORY PROTEIN DEVR NP_217649              | 0.050  | 0.568 |
| DMLILPYLDIRLDYY  | CAA17111.1; PROBABLE ISOCITRATE DEHYDROGENASE                                | 0.030  | 0.567 |
| LMAGGMYETGAGGS   | PROBABLE ISOCITRATE DEHYDROGENASE CAA16247                                   | 0.203  | 0.565 |
| FPMTEKGTFIINGT   | RNA POLYMERASE BETA-SUBUNIT AAA21416                                         | -0.078 | 0.564 |
| AKFILDVDPRIHLI   | MCE-FAMILY PROTEIN MCE1AYP_177701                                            | 0.156  | 0.563 |
| DAARVICRRSKLMTR  | MYCOBACTERIUM BOVIS MYCOCEROSIC ACID SYNTHASE GENE; M95808                   | 0.007  | 0.560 |
| VIDSMFMSKKALCDF  | PROBABLE ISOCITRATE DEHYDROGENASE CAA16247                                   | 0.702  | 0.558 |
| RRLAEAFGPDFAGFP  | POSSIBLE GLYCOSYL TRANSFERASE CAB05418                                       | 0.353  | 0.558 |
| LMAVHLACRSLHDGE  | MYCOBACTERIUM BOVIS MYCOCEROSIC ACID SYNTHASE GENE; M95808                   | 0.271  | 0.554 |
| GYTATFLETSPQFFP  | PPE FAMILY PROTEIN CAE55504                                                  | 0.518  | 0.554 |
| EFERVYEEEFKAQFE  | CAA17111.1; PROBABLE ISOCITRATE DEHYDROGENASE                                | 0.346  | 0.552 |
| VGFGNMGLGNIGFGN  | YP_177963; PPE FAMILY PROTEIN                                                | 0.927  | 0.550 |

|                  |                                                                        |        |       |
|------------------|------------------------------------------------------------------------|--------|-------|
| ALVHGMFVALPAATA  | CAE55335.1; PE FAMILY PROTEIN                                          | 0.150  | 0.548 |
| DELIDRDWSPKVFSG  | MYCOBACTERIUM BOVIS MYCOCEROSIC ACID SYNTHASE GENE; M95808             | 0.356  | 0.548 |
| PPALSQDRFADFPAL  | CAB09453.1; PROBABLE SERINE PROTEASE PEPA                              | 0.210  | 0.544 |
| GILWRGNYEGLFSYS  | YP_177963; PPE FAMILY PROTEIN                                          | 0.025  | 0.542 |
| MSAEQPTIITYLTDE  | PROBABLE ISOCITRATE DEHYDROGENASE CAA16247                             | -0.061 | 0.541 |
| VLDVRLPDGNGIELC  | TWO COMPONENT TRANSCRIPTIONAL REGULATORY PROTEIN DEVR NP_217649        | 0.394  | 0.538 |
| MYSYEGASAAASALP  | PPE FAMILY PROTEIN CAE55334                                            | 0.086  | 0.536 |
| AALEPVNPPKPPPAI  | MTB48 AAK31576                                                         | 0.148  | 0.532 |
| MWDSVASDLFSAASA  | CAE55371.1; PPE FAMILY PROTEIN                                         | 0.137  | 0.532 |
| HAFGDQYRATNFKVD  | CAA17111.1; PROBABLE ISOCITRATE DEHYDROGENASE                          | 0.298  | 0.532 |
| DAADKVLGYRNWLGL  | MTB81 (publication)                                                    | 0.057  | 0.531 |
| HTIPSERFFGNLTQGG | POSSIBLE GLYCOSYL TRANSFERASE CAB05415                                 | 0.418  | 0.529 |
| GTSENDERDRLVSE   | MYCOBACTERIUM BOVIS MYCOCEROSIC ACID SYNTHASE GENE; M95808             | -0.008 | 0.529 |
| GALWTGDHHLVGFSG  | YP_177963; PPE FAMILY PROTEIN                                          | 0.560  | 0.528 |
| YNEWSFAVGKQLNMA  | PERIPLASMIC PHOSPHATE-BINDING LIPOPROTEIN PSTS2 YP_177769              | 0.588  | 0.525 |
| WVAVWYTATILHNAG  | POSSIBLE HEMOLYSIN-LIKE PROTEIN CAA17201                               | -0.072 | 0.525 |
| SKTAASPSRSPQSS   | RNA POLYMERASE BETA-SUBUNIT AAA21416                                   | -0.083 | 0.525 |
| FYRRGLFGTIGPYNL  | POSSIBLE GLYCOSYL TRANSFERASE CAB05419                                 | 0.544  | 0.525 |
| SQMHVSRLLAKSAR   | ALTERNATE RNA POLYMERASE SIGMA FACTOR SIGF CAB07069                    | 0.012  | 0.524 |
| TDGIPPPNSALVSWL  | MYCOBACTERIUM BOVIS ACYL-COA SYNTHASE GENE; U75685                     | 0.082  | 0.524 |
| IVRDVLAAGDFWGGGA | PUTATIVE ESAT-6 LIKE PROTEIN ESXN YP_177838                            | 0.302  | 0.524 |
| LAAASAWDGLAEELH  | PPE FAMILY PROTEIN CAE55504                                            | 0.928  | 0.523 |
| RCGSPAWNLPVVFPG  | PERIPLASMIC PHOSPHATE-BINDING LIPOPROTEIN PSTS3 YP_177768              | 0.024  | 0.523 |
| LDGLRAQDDYNGWDI  | CAB10044.1; SECRETED ANTIGEN 85-B FBPB (85B)                           | 0.389  | 0.523 |
| MAKQAQYVAQLHVWA  | MTB48 AAK31576                                                         | 0.099  | 0.522 |
| TAGNPAKRAMLRDMG  | MYCOBACTERIUM BOVIS MYCOCEROSIC ACID SYNTHASE GENE; M95808             | 0.422  | 0.522 |
| IGPYNLRYRVLADWD  | POSSIBLE GLYCOSYL TRANSFERASE CAB05419                                 | 0.349  | 0.521 |
| AMYWAQELAAQTDDQ  | PROBABLE ISOCITRATE DEHYDROGENASE CAA16247                             | 0.223  | 0.521 |
| SLFPEFSELFAPFS   | CAA17245.1; HEAT SHOCK PROTEIN HSPX                                    | -0.126 | 0.520 |
| PWILAYEDHNVDAGL  | MTB81 (publication)                                                    | 0.342  | 0.518 |
| GEINGQFFVEMRMID  | TRANSMEMBRANE SERINE/THREONINE-PROTEIN KINASE D PKND NP_215446         | -0.083 | 0.518 |
| CIRAAARGAHIRSVT  | PUTATIVE CYCLOPROPANE-FATTY-ACYL-PHOSPHOLIPID SYNTHASE UFAA1 NP_854118 | -0.145 | 0.516 |
| DESYKVTGTAPIYEI  | CAB08889.1; IRON-REGULATED CONSERVED HYPOTHETICAL PROTEIN              | -0.048 | 0.514 |
| AALNATDPGAAQFN   | LOW MOLECULAR WEIGHT T-CELL ANTIGEN TB8.4 NP_215690                    | -0.051 | 0.513 |
| YDPEPGVPGRSVSRW  | MYCOBACTERIUM BOVIS MYCOCEROSIC ACID SYNTHASE GENE; M95808             | 0.115  | 0.511 |
| GINYRVLWQAAGPDT  | CAB06500.1; IMMUNOGENIC PROTEIN MPT63                                  | 0.217  | 0.510 |
| LLLLGEGIPDPGDIF  | CAB06237.1; CONSERVED HYPOTHETICAL PROTEIN                             | -0.036 | 0.510 |
| IGPFRIEPIDVPAVV  | YP_177963; PPE FAMILY PROTEIN                                          | -0.553 | 0.509 |
| VKPPTWWHSLPTDRP  | POSSIBLE GLYCOSYL TRANSFERASE CAB05418                                 | 0.299  | 0.507 |
| AGEVEYVPSSEVDYM  | RNA POLYMERASE BETA-SUBUNIT AAA21416                                   | -0.105 | 0.507 |
| PGLPDIPLPDFKWP   | CAB06237.1; CONSERVED HYPOTHETICAL PROTEIN                             | 0.006  | 0.507 |
| DHTLYADVPELMPTY  | POSSIBLE GLYCOSYL TRANSFERASE CAB05415                                 | 0.313  | 0.507 |
| YFAAYVITSVDEEMR  | RNA POLYMERASE BETA-SUBUNIT AAA21417                                   | 0.194  | 0.505 |
| FNRLPDELSDVETGL  | MYCOBACTERIUM BOVIS MYCOCEROSIC ACID SYNTHASE GENE; M95808             | -0.176 | 0.505 |
| PLDTPPAPAPPPFRL  | YP_177963; PPE FAMILY PROTEIN                                          | 1.112  | 0.505 |
| DALFTGLIAIHGLKA  | MTB81 (publication)                                                    | 0.199  | 0.502 |
| DVPELMPTYDLPAH   | POSSIBLE GLYCOSYL TRANSFERASE CAB05415                                 | 0.533  | 0.501 |
| CPDGTVEIIVVHGDN  | MYCOBACTERIUM BOVIS ACYL-COA SYNTHASE GENE; U75685                     | 0.519  | 0.501 |
| HPRSLFPEFSELFAG  | CAA17245.1; HEAT SHOCK PROTEIN HSPX                                    | 0.178  | 0.501 |
| AMMARDTAEAAKWGG  | CAA17363.1; LOW MOLECULAR WEIGHT PROTEIN ANTIGEN 7 ESXH                | 0.084  | 0.501 |
| VQFAAAVQAAMEDGY  | MYCOBACTERIUM BOVIS MYCOCEROSIC ACID SYNTHASE GENE; M95808             | -0.049 | 0.500 |
| AGAVMQVISRSEYRQ  | POSSIBLE GLYCOSYL TRANSFERASE CAB05415                                 | 0.314  | 0.500 |
| TAHATAWYGLNDLAQ  | MYCOBACTERIUM BOVIS MYCOCEROSIC ACID SYNTHASE GENE; M95808             | 0.289  | 0.500 |
| VKGAWVLARYDDGRP  | CONSERVED HYPOTHETICAL PROTEIN TB18.5CAD93033                          | 0.292  | 0.499 |
| LFIHRPDALARRIGR  | PUTATIVE CYCLOPROPANE-FATTY-ACYL-PHOSPHOLIPID SYNTHASE UFAA1 NP_854118 | 0.109  | 0.499 |
| KPAALVHGMFVALPA  | CAE55335.1; PE FAMILY PROTEIN                                          | 0.037  | 0.498 |
| TGHQVGDRVGGFSEG  | MYCOBACTERIUM BOVIS MYCOCEROSIC ACID SYNTHASE GENE; M95808             | 0.467  | 0.498 |
| PWKAPPIAHSTVLV   | PPE FAMILY PROTEIN CAE55489                                            | -0.104 | 0.498 |
| EMTAVQRSFNRTLLS  | PPE FAMILY PROTEIN CAE55489                                            | -0.099 | 0.496 |
| DLCDYRDVDGQYDSV  | PUTATIVE CYCLOPROPANE-FATTY-ACYL-PHOSPHOLIPID SYNTHASE UFAA1 NP_854118 | -0.125 | 0.495 |
| QEMLNVMEEHQVRRV  | HYPOTHETICAL PROTEIN RV2626C NP_217142                                 | 0.066  | 0.492 |
| FFNTGTGNWGLFNSG  | YP_177963; PPE FAMILY PROTEIN                                          | 0.391  | 0.491 |

|                  |                                                                              |        |       |
|------------------|------------------------------------------------------------------------------|--------|-------|
| AVIPGYPVAGQVWEA  | CAB06500.1; IMMUNOGENIC PROTEIN MPT63                                        | -0.135 | 0.491 |
| NYRYAINNSFGFGGH  | 3-OXOACYL-[ACYL-CARRIER PROTEIN] SYNTHASE 2 KASB CAA94642                    | 0.464  | 0.488 |
| LGSPGQGAYAAANSW  | MYCOBACTERIUM BOVIS MYCOCEROSIC ACID SYNTHASE GENE; M95808                   | 0.231  | 0.487 |
| DMRARGMKAVSPLTV  | 3-OXOACYL-[ACYL-CARRIER PROTEIN] SYNTHASE 2 KASB CAA94642                    | -0.149 | 0.486 |
| FSNGILWRGNFEGLF  | YP_177963; PPE FAMILY PROTEIN                                                | 0.483  | 0.486 |
| AIPVDQAKRIADELI  | CAA17582.1; PROBABLE SERINE PROTEASE PEPD                                    | 0.325  | 0.486 |
| TGNFSNGILWRGNYE  | YP_177963; PPE FAMILY PROTEIN                                                | 1.015  | 0.485 |
| SVRSLPAALRACACL  | MYCOBACTERIUM BOVIS ACYL-COA SYNTHASE GENE; U75685                           | -0.184 | 0.485 |
| TYSCAMFTDLLAQPT  | PUTATIVE CYCLOPROPANE-FATTY-ACYL-PHOSPHOLIPID SYNTHASE UFAA1 NP_854118       | 0.224  | 0.483 |
| RLAGIPYIAIANAYW  | POSSIBLE GLYCOSYL TRANSFERASE CAB05415                                       | 0.389  | 0.482 |
| VVPLMAGGMYETGA   | PROBABLE ISOCITRATE DEHYDROGENASE CAA16247                                   | -0.016 | 0.481 |
| SGQGSQWAAMGTQLL  | MYCOBACTERIUM BOVIS MYCOCEROSIC ACID SYNTHASE GENE; M95808                   | 0.182  | 0.479 |
| DGGVVLGMYNFKESI  | CAA17111.1; PROBABLE ISOCITRATE DEHYDROGENASE                                | 0.015  | 0.478 |
| ARRIGHRLIGLFGES  | PUTATIVE CYCLOPROPANE-FATTY-ACYL-PHOSPHOLIPID SYNTHASE UFAA1 NP_854118       | 0.305  | 0.477 |
| SELFAAFPSFAGLRP  | CAA17245.1; HEAT SHOCK PROTEIN HSPX                                          | -0.242 | 0.476 |
| HTANATVYMIDTVLM  | CAA98350.1; CELL SURFACE LIPOPROTEIN MPT83                                   | -0.208 | 0.476 |
| TAVAAICHYIAMWV   | POSSIBLE HEMOLYSIN-LIKE PROTEIN CAA17201                                     | 0.034  | 0.476 |
| TDLGVPFTEPASVLA  | SECRETED L-ALANINE DEHYDROGENASE ALD CAA15575                                | -0.068 | 0.472 |
| NTMAMLRDGAEEAAK  | CAA16104.1; SECRETED ESAT-6 LIKE PROTEIN ESXR                                | 0.059  | 0.472 |
| GPMLAAASAWDGLAE  | PPE FAMILY PROTEIN CAE55504                                                  | -0.095 | 0.472 |
| RSEYRQAAARLADAF  | POSSIBLE GLYCOSYL TRANSFERASE CAB05415                                       | 0.413  | 0.471 |
| TNKQIADRMFLAEKT  | TWO COMPONENT TRANSCRIPTIONAL REGULATORY PROTEIN DEVR NP_217649              | 0.004  | 0.471 |
| DLNSRMPQSRHDIQQ  | MCE-FAMILY PROTEIN MCE1AYP_177701                                            | 0.057  | 0.470 |
| MWELYLAYSEAGFRS  | PUTATIVE CYCLOPROPANE-FATTY-ACYL-PHOSPHOLIPID SYNTHASE UFAA1 NP_854118       | 0.019  | 0.469 |
| AKVRRERMGHIELAA  | RNA POLYMERASE BETA'-SUBUNIT AAA21417                                        | -0.204 | 0.468 |
| YRVLWQAAGPDTISG  | CAB06500.1; IMMUNOGENIC PROTEIN MPT63                                        | 0.064  | 0.468 |
| FVYAYVRSCPGYTLD  | PERIPLASMIC PHOSPHATE-BINDING LIPOPROTEIN PSTS2 YP_177769                    | -0.060 | 0.468 |
| LGSAEELVFSYDDMR  | 3-OXOACYL-[ACYL-CARRIER PROTEIN] SYNTHASE 2 KASB CAA94642                    | -0.013 | 0.467 |
| WLDPYRPHENELIKK  | PROBABLE ISOCITRATE DEHYDROGENASE CAA16247                                   | 0.833  | 0.466 |
| KVCKGLEKIPLLGH   | CAB06237.1; CONSERVED HYPOTHETICAL PROTEIN                                   | 0.071  | 0.466 |
| TYALTNATMPYVLEL  | SECRETED L-ALANINE DEHYDROGENASE ALD CAA15575                                | -0.107 | 0.465 |
| GVIFFFNPGELLPEA  | CAA98382.1; IMMUNOGENIC PROTEIN MPT64                                        | -0.209 | 0.463 |
| MLSVVPLMAGGMYE   | PROBABLE ISOCITRATE DEHYDROGENASE CAA16247                                   | 0.042  | 0.463 |
| KSQTVFMGDFPMMTE  | RNA POLYMERASE BETA-SUBUNIT AAA21416                                         | -0.125 | 0.462 |
| PVDIGGYAPDSMT    | PROBABLE ISOCITRATE DEHYDROGENASE CAA16247                                   | 0.030  | 0.461 |
| SNMDQHLNMEALERA  | POSSIBLE GLYCOSYL TRANSFERASE CAB05418                                       | 0.127  | 0.461 |
| DIILNTHGVPRRMNI  | RNA POLYMERASE BETA-SUBUNIT AAA21416                                         | 0.307  | 0.460 |
| WGAQLNAMKGDQLQSS | CAB10044.1; SECRETED ANTIGEN 85-B FBPB (85B)                                 | 0.234  | 0.457 |
| SEEDETAWRNGDWYV  | MYCOBACTERIUM BOVIS MYCOCEROSIC ACID SYNTHASE GENE; M95808                   | 0.035  | 0.455 |
| PYLTVELIEDLARRA  | CAA16030.1; PROBABLE MOLYBDOPTERIN-GUANINE DINUCLEOTIDE BIOSYNTHESIS PROTEIN | 0.127  | 0.455 |
| GVPLYLLLGWVAVWY  | POSSIBLE HEMOLYSIN-LIKE PROTEIN CAA17201                                     | 0.039  | 0.454 |
| RSPISNMVSMANNHM  | CAE55371.1; PPE FAMILY PROTEIN                                               | -0.000 | 0.453 |
| KAVKEYARKHPHSMG  | PROBABLE ISOCITRATE DEHYDROGENASE CAA16247                                   | 0.341  | 0.452 |
| MGDFPMMTEKGTFTI  | RNA POLYMERASE BETA-SUBUNIT AAA21416                                         | 0.063  | 0.451 |
| ALVNLADEEKADLLV  | CAB08889.1; IRON-REGULATED CONSERVED HYPOTHETICAL PROTEIN                    | 0.005  | 0.450 |
| GYRSWPRYFAALEQL  | PUTATIVE CYCLOPROPANE-FATTY-ACYL-PHOSPHOLIPID SYNTHASE UFAA1 NP_854118       | 0.218  | 0.449 |
| EENHLRWDSLGEFLA  | PROBABLE ISOCITRATE DEHYDROGENASE CAA16247                                   | 0.262  | 0.449 |
| VQRHPRSLFPEFSEL  | CAA17245.1; HEAT SHOCK PROTEIN HSPX                                          | 0.337  | 0.449 |
| FQSVVWGLTVGWSWIG | CAE55371.1; PPE FAMILY PROTEIN                                               | 0.032  | 0.448 |
| NFGFGNSGLGLPPGM  | YP_177963; PPE FAMILY PROTEIN                                                | 0.083  | 0.448 |
| LDPSRYEVHFACDPR  | POSSIBLE GLYCOSYL TRANSFERASE CAB05415                                       | 0.263  | 0.447 |
| RKYIAADRKILNEIA  | POSSIBLE GLYCOSYL TRANSFERASE CAB05418                                       | 0.407  | 0.447 |
| GESYMAGEWSSKELT  | PUTATIVE CYCLOPROPANE-FATTY-ACYL-PHOSPHOLIPID SYNTHASE UFAA1 NP_854118       | 0.674  | 0.447 |
| LQAHPHAVNGTAMRE  | MYCOBACTERIUM BOVIS MYCOCEROSIC ACID SYNTHASE GENE; M95808                   | -0.176 | 0.444 |
| QMQDAFETGVMFSLH  | PROBABLE ISOCITRATE DEHYDROGENASE CAA16247                                   | 0.524  | 0.444 |
| PSMTIGGQTYTIPLD  | YP_177963; PPE FAMILY PROTEIN                                                | -0.045 | 0.443 |
| IVLATYEIVCSKYPD  | PERIPLASMIC PHOSPHATE-BINDING LIPOPROTEIN PSTS2 YP_177769                    | 0.018  | 0.441 |
| NYQFGDVDAHGAMIR  | PUTATIVE ESAT-6 LIKE PROTEIN ESXN YP_177838                                  | 0.153  | 0.441 |
| GEHETLTAAQYMR    | HYPOTHETICAL PROTEIN RV2626C NP_217142                                       | -0.113 | 0.440 |
| YELSPIEDFSGMSML  | RNA POLYMERASE BETA-SUBUNIT AAA21416                                         | 0.065  | 0.439 |

|                  |                                                                              |        |       |
|------------------|------------------------------------------------------------------------------|--------|-------|
| YPDATTGTAVRAFMQ  | PERIPLASMIC PHOSPHATE-BINDING LIPOPROTEIN PSTS2 YP_177769                    | -0.115 | 0.439 |
| SAFAAKAGLMRHTIG  | CONSERVED HYPOTHETICAL PROTEIN TB9.8 CAD93159                                | -0.197 | 0.438 |
| NEGVKGAWVLARYDD  | CONSERVED HYPOTHETICAL PROTEIN TB18.5CAD93033                                | 0.379  | 0.438 |
| YNYMAPERFTGDEVT  | TRANSMEMBRANE SERINE/THREONINE-PROTEIN KINASE D PKND NP_215446               | 0.102  | 0.436 |
| LTNATMPYVLELADH  | SECRETED L-ALANINE DEHYDROGENASE ALD CAA15575                                | 0.138  | 0.435 |
| PEWNEGVKGAWVLAR  | CONSERVED HYPOTHETICAL PROTEIN TB18.5CAD93033                                | 0.677  | 0.434 |
| RRKAGEVEYVPSSEV  | RNA POLYMERASE BETA-SUBUNIT AAA21416                                         | -0.127 | 0.433 |
| LWVYCGNGTPNELGG  | CAB10044.1; SECRETED ANTIGEN 85-B FBPB (85B)                                 | 0.132  | 0.428 |
| KMGLAIPGTNWIGQA  | CAB06237.1; CONSERVED HYPOTHETICAL PROTEIN                                   | 0.043  | 0.428 |
| GVYFDEIDKSTDKT   | RNA POLYMERASE BETA-SUBUNIT AAA21416                                         | -0.071 | 0.427 |
| DAAVGHGDRGPVWVF  | MYCOBACTERIUM BOVIS MYCOCEROSIC ACID SYNTHASE GENE; M95808                   | 0.211  | 0.427 |
| AAQMWDVSVASDLFSA | CAE55371.1; PPE FAMILY PROTEIN                                               | -0.068 | 0.424 |
| TWWDLSLPTDRPIVYA | POSSIBLE GLYCOSYL TRANSFERASE CAB05415                                       | -0.020 | 0.422 |
| HDTLDAVERREATWR  | CONSERVED HYPOTHETICAL PROTEIN CAB08634                                      | 0.288  | 0.421 |
| VDTLNSGQYTVFAPT  | CAA98373.1; MAJOR SECRETED IMMUNOGENIC PROTEIN                               | 0.045  | 0.419 |
| QIVERGFSEIMRST   | RNA POLYMERASE BETA-SUBUNIT AAA21416                                         | -0.186 | 0.419 |
| HRYLGPVLWSPDVKP  | POSSIBLE GLYCOSYL TRANSFERASE CAB05418                                       | 0.370  | 0.417 |
| LDVAEGDTVIYSKYG  | CAB01005.1; 10 KDA CHAPERONIN GROES                                          | 0.019  | 0.414 |
| YDHPTFAVHDTLFYC  | SECRETED L-ALANINE DEHYDROGENASE ALD CAA15575                                | 0.222  | 0.414 |
| EYLGVLWSPAGKPP   | POSSIBLE GLYCOSYL TRANSFERASE CAB05415                                       | -0.007 | 0.412 |
| NRAAALMAKLRGAA   | TWO COMPONENT TRANSCRIPTIONAL REGULATORY PROTEIN DEVR NP_217649              | 0.012  | 0.411 |
| DEALLDIYRKLRPGE  | RNA POLYMERASE BETA-SUBUNIT AAA21416                                         | -0.017 | 0.411 |
| PVETDDIDHFGNRRRL | RNA POLYMERASE BETA-SUBUNIT AAA21416                                         | 0.505  | 0.411 |
| CAGGGATSLISYMLP  | MYCOBACTERIUM BOVIS ACYL-COA SYNTHASE GENE; U75685                           | -0.045 | 0.409 |
| EDGEVMRDYRLRVSD  | PPE FAMILY PROTEIN CAE55489                                                  | 0.419  | 0.409 |
| RVGRYKVNKKLGLHV  | RNA POLYMERASE BETA-SUBUNIT AAA21416                                         | 0.025  | 0.407 |
| SASLVAAQMWDVSA   | CAE55371.1; PPE FAMILY PROTEIN                                               | 0.029  | 0.407 |
| TLPVQRHPRSLPFEF  | CAA17245.1; HEAT SHOCK PROTEIN HSPX                                          | 0.087  | 0.407 |
| IYNTSTLPLGTPALV  | YP_177963; PPE FAMILY PROTEIN                                                | -0.203 | 0.405 |
| RLVKLLYRLERPLLF  | POSSIBLE GLYCOSYL TRANSFERASE CAB05415                                       | 0.039  | 0.404 |
| KGSQQEDEALYTEDR  | MTB48 AAK31576                                                               | -0.143 | 0.401 |
| MIDGVYKVKCKGLEKI | CAB06237.1; CONSERVED HYPOTHETICAL PROTEIN                                   | -0.218 | 0.400 |
| VPTYNLNANHRYLGP  | POSSIBLE GLYCOSYL TRANSFERASE CAB05418                                       | 0.292  | 0.399 |
| HYLAAYVRTDLADRV  | CAA16030.1; PROBABLE MOLYBDOPTERIN-GUANINE DINUCLEOTIDE BIOSYNTHESIS PROTEIN | 0.005  | 0.398 |
| RLRVSDALSCLTPWK  | PPE FAMILY PROTEIN CAE55489                                                  | 0.014  | 0.398 |
| YTFKEDEYPTAYLQ   | MYCOBACTERIUM BOVIS ACYL-COA SYNTHASE GENE; U75685                           | 0.213  | 0.398 |
| ATYEIVCSKYPDATT  | PERIPLASMIC PHOSPHATE-BINDING LIPOPROTEIN PSTS2 YP_177769                    | 0.032  | 0.397 |
| ACLQPHDPAFTFMDY  | MYCOBACTERIUM BOVIS ACYL-COA SYNTHASE GENE; U75685                           | 0.164  | 0.397 |
| HAIHTIPSERFFGNL  | POSSIBLE GLYCOSYL TRANSFERASE CAB05415                                       | 0.583  | 0.396 |
| WDLTSAEFTRRRYAE  | CONSERVED HYPOTHETICAL PROTEIN CAB08634                                      | 0.281  | 0.395 |
| LGWNLCRIFTDGDHT  | POSSIBLE GLYCOSYL TRANSFERASE CAB05415                                       | 0.329  | 0.395 |
| NYGQVVAALNATDPG  | LOW MOLECULAR WEIGHT T-CELL ANTIGEN TB8.4 NP_215690                          | -0.026 | 0.394 |
| EVMRDYRLRVSDALS  | PPE FAMILY PROTEIN CAE55489                                                  | 0.450  | 0.391 |
| VCAVDMPYLTVELIE  | CAA16030.1; PROBABLE MOLYBDOPTERIN-GUANINE DINUCLEOTIDE BIOSYNTHESIS PROTEIN | 0.556  | 0.391 |
| GTATNQDGRTELTLM  | MYCOBACTERIUM BOVIS MYCOCEROSIC ACID SYNTHASE GENE; M95808                   | -0.013 | 0.390 |
| EPEPHWGPFGGAAPV  | PPE FAMILY PROTEIN CAE55334                                                  | -0.070 | 0.390 |
| NPAKRAMLRDMGVEH  | MYCOBACTERIUM BOVIS MYCOCEROSIC ACID SYNTHASE GENE; M95808                   | -0.111 | 0.388 |
| GLGNAGSNNVGFNGM  | YP_177963; PPE FAMILY PROTEIN                                                | 0.084  | 0.388 |
| PYAVEYVWGRQVGDN  | MCE-FAMILY PROTEIN MCE1AYP_177701                                            | 0.132  | 0.386 |
| RDFARASFSYGLNAK  | CAA17111.1; PROBABLE ISOCITRATE DEHYDROGENASE                                | 0.144  | 0.386 |
| EVDLLDLAPNGYTF   | MYCOBACTERIUM BOVIS ACYL-COA SYNTHASE GENE; U75685                           | -0.047 | 0.385 |
| ERFTGDEVITYRADIY | TRANSMEMBRANE SERINE/THREONINE-PROTEIN KINASE D PKND NP_215446               | 0.083  | 0.384 |
| PTIVAMNNGMEDLLI  | CAB06500.1; IMMUNOGENIC PROTEIN MPT63                                        | 0.151  | 0.383 |
| FCKTNGQFDPTTMGT  | PROBABLE ISOCITRATE DEHYDROGENASE CAA16247                                   | 0.878  | 0.382 |
| IPPPNSALVSWLPFY  | MYCOBACTERIUM BOVIS ACYL-COA SYNTHASE GENE; U75685                           | 0.106  | 0.382 |
| GYLDVYQWTLIREGP  | PUTATIVE CYCLOPROPANE-FATTY-ACYL-PHOSPHOLIPID SYNTHASE UFAA1 NP_854118       | 0.145  | 0.381 |
| AGLGPMALAAASAWDG | PPE FAMILY PROTEIN CAE55504                                                  | 0.120  | 0.379 |
| FLHDAFPNEFPDPTI  | YP_177963; PPE FAMILY PROTEIN                                                | 0.006  | 0.379 |
| SFYRPKRPGSYPIVL  | PERIPLASMIC PHOSPHATE-BINDING LIPOPROTEIN PSTS3 YP_177768                    | 0.089  | 0.379 |
| GDTLFTQYLSKQDP   | PERIPLASMIC PHOSPHATE-BINDING LIPOPROTEIN PSTS1 YP_177770                    | -0.344 | 0.378 |
| GSHYKITGTATGVDM  | LIPOPROTEIN LPQH PRECURSOR P0A5J0                                            | -0.087 | 0.375 |

|                  |                                                                              |        |       |
|------------------|------------------------------------------------------------------------------|--------|-------|
| VPLHRSDGSGDTFLF  | PERIPLASMIC PHOSPHATE-BINDING LIPOPROTEIN PSTS1 YP_177770                    | -0.075 | 0.375 |
| APAPPPFRLPLLFVN  | YP_177963; PPE FAMILY PROTEIN                                                | 0.284  | 0.374 |
| YLDIRLDYYDLGIEH  | CAA17111.1; PROBABLE ISOCITRATE DEHYDROGENASE                                | 0.061  | 0.372 |
| VPSPFGLFPDWDWAE  | PPE FAMILY PROTEIN CAE55504                                                  | -0.174 | 0.371 |
| MTSAGGLLEQAAAVE  | CAE55371.1; PPE FAMILY PROTEIN                                               | 0.559  | 0.371 |
| GFPALPGLPSIPNLF  | CAB06237.1; CONSERVED HYPOTHETICAL PROTEIN                                   | -0.111 | 0.369 |
| TSTNPIASIFAWTRG  | CAA17111.1; PROBABLE ISOCITRATE DEHYDROGENASE                                | -0.224 | 0.367 |
| PAWTELAQAQRKID   | PUTATIVE CYCLOPROPANE-FATTY-ACYL-PHOSPHOLIPID SYNTHASE UFAA1 NP_854118       | 0.031  | 0.367 |
| LAAARAWRSLDVEMT  | PPE FAMILY PROTEIN CAE55489                                                  | 0.165  | 0.367 |
| SRYEYHFACDPRYNQ  | POSSIBLE GLYCOSYL TRANSFERASE CAB05415                                       | 0.310  | 0.366 |
| EEGAYAFETLVRHDR  | MYCOBACTERIUM BOVIS MYCOCEROSIC ACID SYNTHASE GENE; M95808                   | 0.777  | 0.365 |
| HETMVIPPIVFLPSM  | YP_177963; PPE FAMILY PROTEIN                                                | -0.108 | 0.364 |
| ISMIDGPAPDGYPII  | PERIPLASMIC PHOSPHATE-BINDING LIPOPROTEIN PSTS1 YP_177770                    | -0.072 | 0.364 |
| NMSGWVWQAHTALAG  | YP_177963; PPE FAMILY PROTEIN                                                | 0.004  | 0.363 |
| GRNHYLAAVYRTDLA  | CAA16030.1; PROBABLE MOLYBDOPTERIN-GUANINE DINUCLEOTIDE BIOSYNTHESIS PROTEIN | 0.120  | 0.363 |
| ACRSLHDGERDLALA  | MYCOBACTERIUM BOVIS MYCOCEROSIC ACID SYNTHASE GENE; M95808                   | 0.030  | 0.361 |
| AWVLARYDDGRPSQV  | CONSERVED HYPOTHETICAL PROTEIN TB18.5CAD93033                                | -0.041 | 0.361 |
| DSGFVTDGKMFIIGR  | MYCOBACTERIUM BOVIS ACYL-COA SYNTHASE GENE; U75685                           | -0.188 | 0.360 |
| YAEYQQRSEKVLTEY  | MTB48 AAK31576                                                               | 0.056  | 0.360 |
| GNFGAGSSGWWNQAHA | YP_177963; PPE FAMILY PROTEIN                                                | 0.460  | 0.359 |
| GTMKSQPWILAYEDH  | MTB81 (publication)                                                          | 0.288  | 0.359 |
| EDATLTNITDELIDR  | MYCOBACTERIUM BOVIS MYCOCEROSIC ACID SYNTHASE GENE; M95808                   | 0.092  | 0.357 |
| FETLVRHDRAYSQYI  | MYCOBACTERIUM BOVIS MYCOCEROSIC ACID SYNTHASE GENE; M95808                   | -0.224 | 0.356 |
| GPMVRKGTMTKSQPWI | MTB81 (publication)                                                          | -0.019 | 0.355 |
| WPVYLSTKNTILKAY  | CAA17111.1; PROBABLE ISOCITRATE DEHYDROGENASE                                | 0.058  | 0.353 |
| FRHHAIHTIPSERFF  | POSSIBLE GLYCOSYL TRANSFERASE CAB05415                                       | 0.737  | 0.352 |
| PAGACRPFDNRDRDGF | 3-OXOACYL-[ACYL-CARRIER PROTEIN] SYNTHASE 2 KASB CAA94642                    | 0.308  | 0.352 |
| VGDPDEHSLLAGREQ  | MYCOBACTERIUM BOVIS MYCOCEROSIC ACID SYNTHASE GENE; M95808                   | 0.005  | 0.351 |
| RKHGLSSLGWDLCRI  | POSSIBLE GLYCOSYL TRANSFERASE CAB05418                                       | 0.180  | 0.350 |
| QNFNTTFPVGPFGL   | YP_177963; PPE FAMILY PROTEIN                                                | 0.243  | 0.348 |
| RFARFNLQERVIRPS  | MYCOBACTERIUM BOVIS ACYL-COA SYNTHASE GENE; U75685                           | -0.154 | 0.347 |
| NIGFFNSGTGNWGLF  | YP_177963; PPE FAMILY PROTEIN                                                | 0.389  | 0.347 |
| VAAASPYVAVMSVTA  | CAE55371.1; PPE FAMILY PROTEIN                                               | -0.203 | 0.347 |
| TATLLPFEEAPEMTS  | CAE55371.1; PPE FAMILY PROTEIN                                               | -0.075 | 0.346 |
| PSERFFGNLTQGRFY  | POSSIBLE GLYCOSYL TRANSFERASE CAB05415                                       | 0.586  | 0.345 |
| FFFNPGELLPEAAGP  | CAA98382.1; IMMUNOGENIC PROTEIN MPT64                                        | 0.017  | 0.344 |
| NFQRYLQAASNGAWG  | PERIPLASMIC PHOSPHATE-BINDING LIPOPROTEIN PSTS3 YP_177768                    | 0.212  | 0.343 |
| PRLVPGWTKPIVIGR  | CAA17111.1; PROBABLE ISOCITRATE DEHYDROGENASE                                | 0.033  | 0.342 |
| VSVEIMIEAVGYRSWP | PUTATIVE CYCLOPROPANE-FATTY-ACYL-PHOSPHOLIPID SYNTHASE UFAA1 NP_854118       | -0.100 | 0.341 |
| FPAQNFTTFFVPGPF  | YP_177963; PPE FAMILY PROTEIN                                                | 0.045  | 0.341 |
| RMELLAKSGKTIVLK  | PROBABLE ISOCITRATE DEHYDROGENASE CAA16247                                   | 0.315  | 0.340 |
| IMAHVSYYVQSGMTSQ | PROBABLE CUTINASE PRECURSOR CFP21 NP_216500                                  | -0.033 | 0.340 |
| ARGISNFHSPSDVIV  | PROBABLE ISOCITRATE DEHYDROGENASE CAA16247                                   | 0.524  | 0.340 |
| GYVVRWVDQGVGCSK  | MTB81 (publication)                                                          | 0.346  | 0.340 |
| RTAHQDVSPFGLFP   | PPE FAMILY PROTEIN CAE55504                                                  | 0.004  | 0.338 |
| PSVMADVASGNLPAL  | CONSERVED HYPOTHETICAL PROTEIN CAA15739                                      | 0.182  | 0.337 |
| VWARREHPTYEDIVG  | MTB48 AAK31576                                                               | -0.022 | 0.337 |
| QQKWDTATLNNAL    | CAE55648                                                                     | 0.235  | 0.337 |
| LYADVPELMPYDLP   | POSSIBLE GLYCOSYL TRANSFERASE CAB05415                                       | -0.135 | 0.336 |
| VDYAFQYDGVNDFPK  | PPE FAMILY PROTEIN CAE55504                                                  | 0.021  | 0.336 |
| CRIFTDGDYTLADV   | POSSIBLE GLYCOSYL TRANSFERASE CAB05418                                       | 0.192  | 0.335 |
| CPAVIAPLMPNRLQA  | CAB10947.1; PROBABLE LIPOPROTEIN LPRJ                                        | -0.018 | 0.335 |
| RVTPVAVIGMGCRLP  | MYCOBACTERIUM BOVIS MYCOCEROSIC ACID SYNTHASE GENE; M95808                   | -0.249 | 0.335 |
| CVQLSEVERQIHEIV  | PPE FAMILY PROTEIN CAE55489                                                  | 0.018  | 0.334 |
| ISDKMGLAIPGTNWI  | CAB06237.1; CONSERVED HYPOTHETICAL PROTEIN                                   | -0.040 | 0.333 |
| AATITMFTVSATYHR  | POSSIBLE HEMOLYSIN-LIKE PROTEIN CAA17201                                     | -0.202 | 0.331 |
| IEMLTTLKPFGLPG   | CAB06237.1; CONSERVED HYPOTHETICAL PROTEIN                                   | 0.131  | 0.329 |
| GWFNAGHTNTGGFNT  | YP_177963; PPE FAMILY PROTEIN                                                | 0.462  | 0.329 |
| NTRLWVYCGNGTPNE  | CAB10044.1; SECRETED ANTIGEN 85-B FBPB (85B)                                 | 0.082  | 0.329 |
| APKLEKIYFAAYV    | RNA POLYMERASE BETA'-SUBUNIT AAA21417                                        | -0.019 | 0.328 |
| GAGSSGWWNQAAHAL  | YP_177963; PPE FAMILY PROTEIN                                                | 0.058  | 0.327 |
| LEEFDHQLTRIELRR  | 3-OXOACYL-[ACYL-CARRIER PROTEIN] SYNTHASE 2 KASB CAA94642                    | -0.036 | 0.326 |
| PTPGFGNATATPSSG  | YP_177963; PPE FAMILY PROTEIN                                                | -0.199 | 0.323 |

|                  |                                                                |        |       |
|------------------|----------------------------------------------------------------|--------|-------|
| DLVRAYHAMSSTHEA  | CAA17363.1; LOW MOLECULAR WEIGHT PROTEIN ANTIGEN 7 ESXH        | 0.202  | 0.322 |
| DTLWQADTDPLPVVF  | CAA98382.1; IMMUNOGENIC PROTEIN MPT64                          | -0.114 | 0.322 |
| GRNVVLEKKWGAPTI  | 60 kDa chaperonin 2 P0A521                                     | -0.024 | 0.320 |
| FNNGALWTGDHHLV   | YP_177963; PPE FAMILY PROTEIN                                  | 0.730  | 0.320 |
| NTGGFNPNGVNTGWF  | YP_177963; PPE FAMILY PROTEIN                                  | 0.031  | 0.320 |
| AANARWGSYDALYG   | MTB81 (publication)                                            | 0.020  | 0.319 |
| QAAAVEEASDTAAAN  | CAE55371.1; PPE FAMILY PROTEIN                                 | 0.544  | 0.319 |
| AGELARDSIYYVDAN  | HYPOTHETICAL PROTEIN RV2626C NP_217142                         | -0.004 | 0.318 |
| TAATAHATAWYGLND  | MYCOBACTERIUM BOVIS MYCOCEROSIC ACID SYNTHASE GENE; M95808     | 0.126  | 0.317 |
| SPDVKPPTWWHSLPT  | POSSIBLE GLYCOSYL TRANSFERASE CAB05418                         | 0.240  | 0.317 |
| SHYGRMCPIETPEGP  | RNA POLYMERASE BETA-SUBUNIT AAA21416                           | -0.161 | 0.311 |
| FNKLLGPLPFPHHPI  | POSSIBLE GLYCOSYL TRANSFERASE CAB05418                         | 0.286  | 0.311 |
| VPGRSVSRWGGFLDD  | MYCOBACTERIUM BOVIS MYCOCEROSIC ACID SYNTHASE GENE; M95808     | 0.143  | 0.309 |
| ELRHLNPLNIVNLGN  | YP_177963; PPE FAMILY PROTEIN                                  | -0.192 | 0.309 |
| YAGPGPDSMLAAARA  | PPE FAMILY PROTEIN CAE55489                                    | -0.078 | 0.308 |
| TAGEPNFMDLKEAAR  | MTB48 AAK31576                                                 | -0.296 | 0.308 |
| AVAVVAMAAIAFAA   | CAB06500.1; IMMUNOGENIC PROTEIN MPT63                          | 0.009  | 0.308 |
| FIVWTSSGAIGPTWY  | YP_177963; PPE FAMILY PROTEIN                                  | 0.079  | 0.307 |
| QTYKWETFLTSELQ   | CAB10044.1; SECRETED ANTIGEN 85-B FBPB (85B)                   | -0.152 | 0.305 |
| HDYASGYIPILGAP   | MYCOBACTERIUM BOVIS MYCOCEROSIC ACID SYNTHASE GENE; M95808     | -0.126 | 0.305 |
| NPESTFSRIYQIIN   | PROBABLE ISOCITRATE DEHYDROGENASE CAA16247                     | 0.074  | 0.304 |
| DLVRAYQSMSTHES   | CAA16104.1; SECRETED ESAT-6 LIKE PROTEIN ESXR                  | 0.141  | 0.304 |
| SRIYQEIINFCKTNG  | PROBABLE ISOCITRATE DEHYDROGENASE CAA16247                     | 0.040  | 0.304 |
| GVATAAPKTYCEELK  | CAA98382.1; IMMUNOGENIC PROTEIN MPT64                          | 0.989  | 0.301 |
| KDFDGRSEFAYGSFV  | CAA17245.1; HEAT SHOCK PROTEIN HSPX                            | 0.138  | 0.300 |
| QLVEENHLRWDSLGE  | PROBABLE ISOCITRATE DEHYDROGENASE CAA16247                     | 0.225  | 0.300 |
| EFFHACTAVAAICHY  | POSSIBLE HEMOLYSIN-LIKE PROTEIN CAA17201                       | 0.167  | 0.300 |
| RVPPRPYVMPHSPAA  | CAE55371.1; PPE FAMILY PROTEIN                                 | -0.205 | 0.300 |
| VFLPSMTIGGQTYTI  | YP_177963; PPE FAMILY PROTEIN                                  | -0.091 | 0.300 |
| NATDPGAAAFNASP   | LOW MOLECULAR WEIGHT T-CELL ANTIGEN TB8.4 NP_215690            | -0.056 | 0.299 |
| TIAYDEEARGLERG   | 60 kDa chaperonin 2 P0A521                                     | -0.106 | 0.298 |
| WNNPAIQALNRDFTL  | PERIPLASMIC PHOSPHATE-BINDING LIPOPROTEIN PSTS3 YP_177768      | 0.186  | 0.298 |
| KRLPDALRDGNRIFA  | MYCOBACTERIUM BOVIS MYCOCEROSIC ACID SYNTHASE GENE; M95808     | 0.093  | 0.297 |
| FGNSGLGLPPGMGNI  | YP_177963; PPE FAMILY PROTEIN                                  | 0.383  | 0.297 |
| AGGLLEQAAAVEEAS  | CAE55371.1; PPE FAMILY PROTEIN                                 | 0.524  | 0.294 |
| WVHGDNVGNGYWQKP  | MYCOBACTERIUM BOVIS ACYL-COA SYNTHASE GENE; U75685             | 0.423  | 0.294 |
| LRIGLATAEDIRQWS  | RNA POLYMERASE BETA-SUBUNIT AAA21417                           | 0.146  | 0.294 |
| RLLGRRGMGEVYEA   | TRANSMEMBRANE SERINE/THREONINE-PROTEIN KINASE D PKND NP_215446 | 0.408  | 0.290 |
| FGGLTTAHTPRREPR  | MYCOBACTERIUM BOVIS MYCOCEROSIC ACID SYNTHASE GENE; M95808     | 0.197  | 0.286 |
| TGDQGASLAHFADGW  | MTB48 AAK31576                                                 | 0.110  | 0.285 |
| DGRTLREIRYGSFRR  | CAA17343.1; HEAT SHOCK PROTEIN HSP                             | -0.071 | 0.284 |
| RHGLSSLGWNLCRIF  | POSSIBLE GLYCOSYL TRANSFERASE CAB05415                         | 0.046  | 0.284 |
| KASVPGGDMGGMD    | 60 kDa chaperonin 2 P0A521                                     | 0.538  | 0.284 |
| EGTVVAVGPRWDED   | CAB01005.1; 10 KDA CHAPERONIN GROES                            | 0.481  | 0.283 |
| AIRMNCRADVADHLTR | CONSERVED HYPOTHETICAL PROTEIN CAB08634                        | -0.196 | 0.282 |
| LMDAIIFKDTLMSY   | CONSERVED HYPOTHETICAL PROTEIN TB16.3CAD97060                  | -0.131 | 0.282 |
| GYPVHKPVTAGWNGY  | CONSERVED HYPOTHETICAL PROTEIN CAB08634                        | 0.102  | 0.281 |
| ATATATLLPFEEAPE  | CAE55371.1; PPE FAMILY PROTEIN                                 | -0.236 | 0.280 |
| TNGQFDPTTMGTVPN  | PROBABLE ISOCITRATE DEHYDROGENASE CAA16247                     | -0.030 | 0.278 |
| PFGFIETPYRKVVVDG | RNA POLYMERASE BETA-SUBUNIT AAA21416                           | 0.693  | 0.276 |
| ATVSPAMVAANRTRL  | PPE FAMILY PROTEIN CAE55504                                    | -0.161 | 0.275 |
| GMPVFLWLDPYRPHE  | PROBABLE ISOCITRATE DEHYDROGENASE CAA16247                     | 0.462  | 0.275 |
| QVGDRVGGSFEGGCW  | MYCOBACTERIUM BOVIS MYCOCEROSIC ACID SYNTHASE GENE; M95808     | 0.137  | 0.275 |
| MIFVFIAGSYTPFAL  | POSSIBLE HEMOLYSIN-LIKE PROTEIN CAA17201                       | 0.010  | 0.274 |
| PLNWLRRKHGLSSLG  | POSSIBLE GLYCOSYL TRANSFERASE CAB05418                         | -0.125 | 0.273 |
| LATSLRNAAKAYGEV  | MTB48 AAK31576                                                 | -0.161 | 0.273 |
| TAVFTGLTHEDYLV   | MYCOBACTERIUM BOVIS MYCOCEROSIC ACID SYNTHASE GENE; M95808     | 0.190  | 0.272 |
| VNEAEYEMWAQDAA   | CAE55371.1; PPE FAMILY PROTEIN                                 | 0.175  | 0.272 |
| MAKTIAYDEEARGL   | 60 kDa chaperonin 2 P0A521                                     | 0.145  | 0.271 |
| NFGAGSSGWWNQAQT  | YP_177963; PPE FAMILY PROTEIN                                  | 0.090  | 0.271 |
| MVAPDPNGERAGHAI  | 3-OXOACYL-[ACYL-CARRIER PROTEIN] SYNTHASE 2 KASB CAA94642      | -0.024 | 0.271 |
| YTEPILHRRRREFKA  | MTB81 (publication)                                            | -0.034 | 0.270 |
| AAAQRRCGSPAWN    | PERIPLASMIC PHOSPHATE-BINDING LIPOPROTEIN PSTS3 YP_177768      | -0.135 | 0.270 |
| FRADFLSELDAPAA   | CAB01474.1; CONSERVED HYPOTHETICAL PROTEIN CFP17               | -0.086 | 0.270 |
| TRYMHVVVASYNEFG  | POSSIBLE GLYCOSYL TRANSFERASE CAB05419                         | 0.015  | 0.270 |

|                  |                                                                        |        |       |
|------------------|------------------------------------------------------------------------|--------|-------|
| PLLEYAARFITPVHP  | PPE FAMILY PROTEIN CAE55504                                            | -0.078 | 0.270 |
| QSMGTHESNTMAML   | CAA16104.1; SECRETED ESAT-6 LIKE PROTEIN ESXR                          | 0.087  | 0.269 |
| NLCAPDDPICTGGGN  | PROBABLE CUTINASE PRECURSOR CFP21 NP_216500                            | 0.353  | 0.267 |
| MVSMANNHMSMTNSG  | CAE55371.1; PPE FAMILY PROTEIN                                         | -0.031 | 0.267 |
| EWPEDRQSLSWTLES  | CONSERVED HYPOTHETICAL PROTEIN TB16.3CAD97060                          | -0.035 | 0.267 |
| RFVEIGKADVYGNTN  | MYCOBACTERIUM BOVIS MYCOCEROSIC ACID SYNTHASE GENE; M95808             | 0.162  | 0.265 |
| TDGDHTLYADVPML   | POSSIBLE GLYCOSYL TRANSFERASE CAB05415                                 | 0.348  | 0.265 |
| GFNPGNVNTGWLNTG  | YP_177963; PPE FAMILY PROTEIN                                          | 0.031  | 0.264 |
| IINFCKTNGQFDPTT  | PROBABLE ISOCITRATE DEHYDROGENASE CAA16247                             | 0.692  | 0.262 |
| IAHTLGLHGPAMTFD  | MYCOBACTERIUM BOVIS MYCOCEROSIC ACID SYNTHASE GENE; M95808             | 0.063  | 0.261 |
| TAEDIRQWSYGEVKK  | RNA POLYMERASE BETA'-SUBUNIT AAA21417                                  | 0.347  | 0.260 |
| GSLYDALYGTDVPIE  | MTB81 (publication)                                                    | -0.286 | 0.259 |
| KHQELFDDLGVNVNN  | PROBABLE ISOCITRATE DEHYDROGENASE CAA16247                             | 0.176  | 0.258 |
| GMGMPMGAHQGGGG   | MTB48 AAK31576                                                         | -0.094 | 0.258 |
| TPGSITYNEWSFAQA  | PERIPLASMIC PHOSPHATE-BINDING LIPOPROTEIN PSTS3 YP_177768              | 0.164  | 0.257 |
| LIDDMVAACLKWEVG  | CAA17111.1; PROBABLE ISOCITRATE DEHYDROGENASE                          | -0.010 | 0.256 |
| LAMVDSARGISNFHS  | PROBABLE ISOCITRATE DEHYDROGENASE CAA16247                             | 0.062  | 0.255 |
| SAATSSTPREAPYEL  | CAA98382.1; IMMUNOGENIC PROTEIN MPT64                                  | -0.045 | 0.255 |
| LNAGTNTGGFNPGN   | YP_177963; PPE FAMILY PROTEIN                                          | 0.055  | 0.251 |
| VNSANIYAGPGPDSM  | PPE FAMILY PROTEIN CAE55489                                            | 0.067  | 0.251 |
| LDAFKETLLELSD    | CAB07109.1; PROBABLE 50S RIBOSOMAL PROTEIN L7/L12 RPLL                 | -0.186 | 0.251 |
| THAVEQTGRSLDMSV  | MYCOBACTERIUM BOVIS MYCOCEROSIC ACID SYNTHASE GENE; M95808             | -0.095 | 0.250 |
| VNDFPKYPLNVFATA  | PPE FAMILY PROTEIN CAE55504                                            | 0.019  | 0.250 |
| LRAIFGEKAREVRDT  | RNA POLYMERASE BETA'-SUBUNIT AAA21416                                  | 0.052  | 0.249 |
| TGSLNAGTNTGGFN   | YP_177963; PPE FAMILY PROTEIN                                          | -0.116 | 0.248 |
| CLGSGRWPGRLGVS   | HYPOTHETICAL PROTEIN RV2623 NP_217139                                  | 0.068  | 0.248 |
| GEPRPGNYRYAINNS  | 3-OXOACYL-[ACYL-CARRIER PROTEIN] SYNTHASE 2 KASB CAA94642              | -0.129 | 0.248 |
| HIWYFKGVPSRLGYL  | RNA POLYMERASE BETA'-SUBUNIT AAA21417                                  | 0.191  | 0.245 |
| FNIRCFSNPALVTRY  | POSSIBLE GLYCOSYL TRANSFERASE CAB05419                                 | 0.430  | 0.245 |
| LSQDRFADFPALPLD  | CAB09453.1; PROBABLE SERINE PROTEASE PEPA                              | -0.142 | 0.244 |
| EYTVFAPTNAAFDKL  | CAA98350.1; CELL SURFACE LIPOPROTEIN MPT83                             | -0.153 | 0.244 |
| YNLRYRVLADWDFNI  | POSSIBLE GLYCOSYL TRANSFERASE CAB05419                                 | 0.304  | 0.243 |
| AGGYKAADMWGPSSD  | CAB10044.1; SECRETED ANTIGEN 85-B FBPB (85B)                           | 0.281  | 0.241 |
| SITYNEWSFAVGKQL  | PERIPLASMIC PHOSPHATE-BINDING LIPOPROTEIN PSTS2 YP_177769              | 0.270  | 0.241 |
| VGSPYAVEYVWGRQV  | MCE-FAMILY PROTEIN MCE1AYP_177701                                      | -0.066 | 0.240 |
| ESSAAFQAHAHFVA   | CONSERVED HYPOTHETICAL PROTEIN TB9.8 CAD93159                          | 0.072  | 0.240 |
| FGTIGPYNLRYRVL   | POSSIBLE GLYCOSYL TRANSFERASE CAB05419                                 | -0.150 | 0.239 |
| PKRARMMLMDAAIFKD | CONSERVED HYPOTHETICAL PROTEIN TB16.3CAD97060                          | 0.282  | 0.239 |
| FGFGNIGNANFGFNG  | YP_177963; PPE FAMILY PROTEIN                                          | 0.865  | 0.239 |
| AERVGISQMHVSRL   | ALTERNATE RNA POLYMERASE SIGMA FACTOR SIGF CAB07069                    | -0.022 | 0.236 |
| VDSARGISNFHSPSD  | PROBABLE ISOCITRATE DEHYDROGENASE CAA16247                             | 0.655  | 0.235 |
| HIELAAPVTHIWFYK  | RNA POLYMERASE BETA'-SUBUNIT AAA21417                                  | -0.097 | 0.235 |
| VGCAQPACLRYPQC   | MYCOBACTERIUM BOVIS MYCOCEROSIC ACID SYNTHASE GENE; M95808             | 0.027  | 0.234 |
| FMDQNNPLSGLTHKR  | RNA POLYMERASE BETA-SUBUNIT AAA21416                                   | 0.136  | 0.234 |
| ETLTAAAQYMRHDI   | HYPOTHETICAL PROTEIN RV2626C NP_217142                                 | 0.168  | 0.233 |
| TDWYRPVAGDFTPAA  | CAA17343.1; HEAT SHOCK PROTEIN HSP                                     | -0.068 | 0.233 |
| QLMSGYFADTDGIPP  | MYCOBACTERIUM BOVIS ACYL-COA SYNTHASE GENE; U75685                     | 0.225  | 0.232 |
| GTPCALGSAKSNMGH  | MYCOBACTERIUM BOVIS MYCOCEROSIC ACID SYNTHASE GENE; M95808             | 0.077  | 0.231 |
| RRSVAVTPEQRPLYR  | MYCOBACTERIUM BOVIS MYCOCEROSIC ACID SYNTHASE GENE; M95808             | -0.224 | 0.230 |
| MTINYQFGDVDAHGA  | PUTATIVE ESAT-6 LIKE PROTEIN ESXN YP_177838                            | -0.035 | 0.230 |
| NAGSNNVGFNGMGLG  | YP_177963; PPE FAMILY PROTEIN                                          | 0.147  | 0.230 |
| LEMRRPTYVFAAVDH  | CONSERVED HYPOTHETICAL PROTEIN CAB08634                                | -0.201 | 0.230 |
| PNELGGANIPAEFLE  | CAB10044.1; SECRETED ANTIGEN 85-B FBPB (85B)                           | 0.144  | 0.229 |
| DQIDIPGMSLFDIHE  | YP_177963; PPE FAMILY PROTEIN                                          | 0.589  | 0.229 |
| KTINLCAPDDPICTG  | PROBABLE CUTINASE PRECURSOR CFP21 NP_216500                            | 0.231  | 0.227 |
| QFNASPVAAQSYLRNF | LOW MOLECULAR WEIGHT T-CELL ANTIGEN TB8.4 NP_215690                    | 0.217  | 0.227 |
| WMHLMASDFHAFSAA  | MYCOBACTERIUM BOVIS ACYL-COA SYNTHASE GENE; U75685                     | 0.041  | 0.226 |
| VGTDEALLDIYRKL   | RNA POLYMERASE BETA-SUBUNIT AAA21416                                   | -0.334 | 0.226 |
| FNAGTNTGGFNPGN   | YP_177963; PPE FAMILY PROTEIN                                          | 0.087  | 0.225 |
| EAGFRSGYLDVYQWT  | PUTATIVE CYCLOPROPANE-FATTY-ACYL-PHOSPHOLIPID SYNTHASE UFAA1 NP_854118 | 0.158  | 0.224 |
| GFNPGNVNTGWFNAG  | YP_177963; PPE FAMILY PROTEIN                                          | -0.113 | 0.224 |
| AGFASKTPANQAISM  | PERIPLASMIC PHOSPHATE-BINDING LIPOPROTEIN PSTS1 YP_177770              | -0.099 | 0.224 |
| PSDMTNHPRYSPPPQ  | CAA17582.1; PROBABLE SERINE PROTEASE PEPA                              | 0.591  | 0.223 |
| IYSKYGGTEIKYNGE  | CAB01005.1; 10 KDA CHAPERONIN GROES                                    | 0.102  | 0.220 |
| KAVNPESTFSRIYQE  | PROBABLE ISOCITRATE DEHYDROGENASE CAA16247                             | 0.543  | 0.219 |

|                  |                                                                        |        |       |
|------------------|------------------------------------------------------------------------|--------|-------|
| FGSWNLHRTLGGPL   | MYCOBACTERIUM BOVIS MYCOCEROSIC ACID SYNTHASE GENE; M95808             | 0.030  | 0.219 |
| FGPAATTDWYRPVAG  | CAA17343.1; HEAT SHOCK PROTEIN HSP                                     | -0.187 | 0.219 |
| DEEKADLLVGVNVL   | CAB08889.1; IRON-REGULATED CONSERVED HYPOTHETICAL PROTEIN              | -0.109 | 0.219 |
| HQTFSLGPLVVPDIV  | YP_177963; PPE FAMILY PROTEIN                                          | -0.112 | 0.218 |
| KVSHPIVFGHAVRIF  | PROBABLE ISOCITRATE DEHYDROGENASE CAA16247                             | -0.064 | 0.218 |
| AASAAPSIPAANMPP  | CAA17582.1; PROBABLE SERINE PROTEASE PEPD                              | -0.115 | 0.217 |
| AQRRCGSPAWNLPVV  | PERIPLASMIC PHOSPHATE-BINDING LIOPROTEIN PSTS3 YP_177768               | -0.239 | 0.217 |
| DFWGGAGSVACQEFI  | PUTATIVE ESAT-6 LIKE PROTEIN ESXN YP_177838                            | -0.070 | 0.216 |
| KNAAQQLVLSADNMR  | MTB48 AAK31576                                                         | -0.258 | 0.215 |
| NGYIPIPDEFKSRLS  | PERIPLASMIC PHOSPHATE-BINDING LIOPROTEIN PSTS3 YP_177768               | -0.132 | 0.215 |
| NTPAIAVNEAEYEM   | CAE55371.1; PPE FAMILY PROTEIN                                         | -0.159 | 0.215 |
| VRHLVRITRELAEFE  | MYCOBACTERIUM BOVIS MYCOCEROSIC ACID SYNTHASE GENE; M95808             | 0.036  | 0.215 |
| INAFSVGSGQTYGVD  | CAB09453.1; PROBABLE SERINE PROTEASE PEPA                              | -0.248 | 0.214 |
| FSAASAFQSVVWGLT  | CAE55371.1; PPE FAMILY PROTEIN                                         | -0.018 | 0.214 |
| WDATATELNNALQNL  | CAE55648                                                               | -0.138 | 0.214 |
| PLPFRHHAIHTIPSE  | POSSIBLE GLYCOSYL TRANSFERASE CAB05415                                 | 0.065  | 0.212 |
| AAPEPVARRQRILFV  | POSSIBLE GLYCOSYL TRANSFERASE CAB05418                                 | -0.020 | 0.212 |
| GNVNTGAFNSGFSNN  | YP_177963; PPE FAMILY PROTEIN                                          | -0.143 | 0.211 |
| QGLAGKRRATIEQLL  | MTB81 (publication)                                                    | 0.031  | 0.210 |
| VVSDEIVYLTADEED  | RNA POLYMERASE BETA-SUBUNIT AAA21416                                   | 0.157  | 0.210 |
| WIKQYIFPGGLLPST  | PUTATIVE CYCLOPROPANE-FATTY-ACYL-PHOSPHOLIPID SYNTHASE UFAA1 NP_854118 | -0.201 | 0.210 |
| TAQENAMEQFVYAYV  | PERIPLASMIC PHOSPHATE-BINDING LIOPROTEIN PSTS2 YP_177769               | 0.016  | 0.210 |
| STLLYPLFNLWGPAP  | PERIPLASMIC PHOSPHATE-BINDING LIOPROTEIN PSTS1 YP_177770               | 0.241  | 0.209 |
| PLLFVNALGDNWIVG  | YP_177963; PPE FAMILY PROTEIN                                          | -0.044 | 0.209 |
| DQILPVYAEYQQRSE  | MTB48 AAK31576                                                         | -0.185 | 0.207 |
| WKVDAAKGVDPDWAAR | RNA POLYMERASE BETA-SUBUNIT AAA21416                                   | -0.000 | 0.207 |
| DETAWRNGDWYVARL  | MYCOBACTERIUM BOVIS MYCOCEROSIC ACID SYNTHASE GENE; M95808             | -0.103 | 0.206 |
| WENAGSPEVDNRLM   | 3-OXOACYL-[ACYL-CARRIER PROTEIN] SYNTHASE 2 KASB CAA94642              | 0.009  | 0.206 |
| YDALYGTDVIPETDG  | MTB81 (publication)                                                    | -0.167 | 0.205 |
| RFPLPDVWTRFLGV   | POSSIBLE GLYCOSYL TRANSFERASE CAB05415                                 | 0.067  | 0.205 |
| WRGNYEGLFSYSYSL  | YP_177963; PPE FAMILY PROTEIN                                          | 0.174  | 0.205 |
| PGNVNTGWFNAGHTN  | YP_177963; PPE FAMILY PROTEIN                                          | 0.143  | 0.205 |
| YRPMAPNFDDSIAPL  | MTB81 (publication)                                                    | 0.062  | 0.202 |
| VMDTGASLAPYNHME  | MCE-FAMILY PROTEIN MCE1AYP_177701                                      | 0.463  | 0.202 |
| WLRRKHGLSSLGWDL  | POSSIBLE GLYCOSYL TRANSFERASE CAB05418                                 | 0.148  | 0.202 |
| KVLAAMYQGTIKTWD  | PERIPLASMIC PHOSPHATE-BINDING LIOPROTEIN PSTS1 YP_177770               | 0.015  | 0.201 |
| RRTDDDDMAGRDLGN  | MYCOBACTERIUM BOVIS ACYL-COA SYNTHASE GENE; U75685                     | -0.037 | 0.201 |
| RPGNYRYAINNSFGF  | 3-OXOACYL-[ACYL-CARRIER PROTEIN] SYNTHASE 2 KASB CAA94642              | 0.133  | 0.200 |
| LVRHGRAYSGYIPIL  | MYCOBACTERIUM BOVIS MYCOCEROSIC ACID SYNTHASE GENE; M95808             | -0.119 | 0.199 |
| ASFLDQVHFQPLPPA  | PERIPLASMIC PHOSPHATE-BINDING LIOPROTEIN PSTS1 YP_177770               | -0.205 | 0.196 |
| YVWACKNYDGDVQSD  | CAA17111.1; PROBABLE ISOCITRATE DEHYDROGENASE                          | 0.135  | 0.196 |
| FNTGNVNTGAFNSGS  | YP_177963; PPE FAMILY PROTEIN                                          | 0.057  | 0.195 |
| AEAADAIRAMSNAEH  | MYCOBACTERIUM BOVIS MYCOCEROSIC ACID SYNTHASE GENE; M95808             | -0.254 | 0.192 |
| ERLLRAIFGEKAREV  | RNA POLYMERASE BETA-SUBUNIT AAA21416                                   | -0.621 | 0.192 |
| TATELNNALQNLAART | CAE55648                                                               | -0.366 | 0.192 |
| GILWRGNFEGLFGLN  | YP_177963; PPE FAMILY PROTEIN                                          | 0.137  | 0.190 |
| MHGPAEVAFTCELF   | MTB81 (publication)                                                    | -0.074 | 0.190 |
| IGGYAPDSDMTTAV   | PROBABLE ISOCITRATE DEHYDROGENASE CAA16247                             | 0.239  | 0.188 |
| GMSLFDIHVLNIGP   | YP_177963; PPE FAMILY PROTEIN                                          | -0.155 | 0.187 |
| PAGKPPTWWDSLPTD  | POSSIBLE GLYCOSYL TRANSFERASE CAB05415                                 | -0.075 | 0.186 |
| WAQDAAAMFGYAAAT  | CAE55371.1; PPE FAMILY PROTEIN                                         | -0.213 | 0.183 |
| YNQLLGPLPFRHHAI  | POSSIBLE GLYCOSYL TRANSFERASE CAB05415                                 | 0.302  | 0.182 |
| NILRDYLTDLFPIL   | PROBABLE ISOCITRATE DEHYDROGENASE CAA16247                             | -0.379 | 0.182 |
| LVHAVSPEVATWLEV  | HYPOTHETICAL PROTEIN RV2623 NP_217139                                  | -0.091 | 0.182 |
| DANRALMGANMQRQA  | RNA POLYMERASE BETA-SUBUNIT AAA21416                                   | -0.071 | 0.181 |
| TARQLATWVEEHQDC  | MYCOBACTERIUM BOVIS MYCOCEROSIC ACID SYNTHASE GENE; M95808             | 0.101  | 0.181 |
| SIPAANMPPGSVEQV  | CAA17582.1; PROBABLE SERINE PROTEASE PEPD                              | -0.194 | 0.178 |
| VVRFQEAANKQKQEL  | CAA17966.1; 10 KDA CULTURE FILTRATE ANTIGEN ESXB                       | -0.106 | 0.177 |
| MNPDIKQDQTSDEVT  | CAB01474.1; CONSERVED HYPOTHETICAL PROTEIN CFP17                       | 0.061  | 0.177 |
| TILKAYDGMFKDEFE  | CAA17111.1; PROBABLE ISOCITRATE DEHYDROGENASE                          | 0.260  | 0.177 |
| YQGTIKTWDDPQIAA  | PERIPLASMIC PHOSPHATE-BINDING LIOPROTEIN PSTS1 YP_177770               | -0.088 | 0.177 |
| GTTVDFFPAVPGALGE | PERIPLASMIC PHOSPHATE-BINDING LIOPROTEIN PSTS1 YP_177770               | -0.122 | 0.176 |
| RSVSRWGGFLDDVAG  | MYCOBACTERIUM BOVIS MYCOCEROSIC ACID SYNTHASE GENE; M95808             | 0.208  | 0.176 |
| MSLSFSDPRFDDVKA  | RNA POLYMERASE BETA-SUBUNIT AAA21416                                   | -0.060 | 0.176 |
| DPAPQSQLRPGRVP   | TRANSMEMBRANE SERINE/THREONINE-PROTEIN KINASE D PKND                   | -0.070 | 0.175 |

|                  |                                                                              |        |       |
|------------------|------------------------------------------------------------------------------|--------|-------|
|                  | NP_215446                                                                    |        |       |
| GLGNAGSGNVGWANM  | YP_177963; PPE FAMILY PROTEIN                                                | -0.163 | 0.175 |
| GTEIKYNGEEYLILS  | CAB01005.1; 10 KDA CHAPERONIN GROES                                          | 0.129  | 0.175 |
| SQSATIAFEMRYLQ   | PPE FAMILY PROTEIN CAE55504                                                  | -0.002 | 0.174 |
| VSRRAEFLRLENNEF  | CAB01474.1; CONSERVED HYPOTHETICAL PROTEIN CFP17                             | -0.194 | 0.173 |
| WSQLYRRTLNVAREL  | MYCOBACTERIUM BOVIS ACYL-COA SYNTHASE GENE; U75685                           | 0.226  | 0.173 |
| AVLSSAWQGDGTITY  | CAA16104.1; SECRETED ESAT-6 LIKE PROTEIN ESXR                                | -0.151 | 0.172 |
| KLQFLHDAFPNEFPD  | YP_177963; PPE FAMILY PROTEIN                                                | 0.231  | 0.172 |
| LSIVMPVGGQSSSFYS | CAB10044.1; SECRETED ANTIGEN 85-B FBPB (85B)                                 | -0.121 | 0.170 |
| VNTGWFNAGHTNTGG  | YP_177963; PPE FAMILY PROTEIN                                                | 0.195  | 0.170 |
| NTTFPVGPFFGLGVV  | YP_177963; PPE FAMILY PROTEIN                                                | 0.568  | 0.169 |
| AAGFSGRAQVGKGMW  | MTB81 (publication)                                                          | 0.129  | 0.169 |
| AAANSWVDVFAHWPR  | MYCOBACTERIUM BOVIS MYCOCEROSIC ACID SYNTHASE GENE; M95808                   | 0.002  | 0.169 |
| AGGKMYGADGKLKDT  | PROBABLE ISOCITRATE DEHYDROGENASE CAA16247                                   | -0.058 | 0.168 |
| AKEAADEAKAKLEAA  | CAB07109.1; PROBABLE 50S RIBOSOMAL PROTEIN L7/L12 RPLL                       | 0.199  | 0.168 |
| MLTSGSGSGSQPSI   | YP_177963; PPE FAMILY PROTEIN                                                | -0.067 | 0.167 |
| RGACVEQYRQDQFAR  | MYCOBACTERIUM BOVIS ACYL-COA SYNTHASE GENE; U75685                           | 0.174  | 0.166 |
| VWQGDVGTSLVSWLS  | MYCOBACTERIUM BOVIS MYCOCEROSIC ACID SYNTHASE GENE; M95808                   | 0.584  | 0.166 |
| YQNFVAVTNDGVIFFF | CAA98382.1; IMMUNOGENIC PROTEIN MPT64                                        | 0.525  | 0.166 |
| TEQKDFDGRSEFAYG  | CAA17245.1; HEAT SHOCK PROTEIN HSPX                                          | 0.208  | 0.165 |
| VDFPAVPGALGENGN  | PERIPLASMIC PHOSPHATE-BINDING LIPOPROTEIN PSTS1 YP_177770                    | -0.268 | 0.165 |
| LLDLAPNGYTFKED   | MYCOBACTERIUM BOVIS ACYL-COA SYNTHASE GENE; U75685                           | -0.116 | 0.164 |
| FDKGYISGYFVTDPE  | 60 kDa chaperonin 2 P0A521                                                   | 0.155  | 0.163 |
| ERNPTQQIPKLVAN   | CAB10044.1; SECRETED ANTIGEN 85-B FBPB (85B)                                 | -0.314 | 0.163 |
| ANRLLRRRTATHPLR  | PUTATIVE CYCLOPROPANE-FATTY-ACYL-PHOSPHOLIPID SYNTHASE UFAA1 NP_854118       | -0.139 | 0.162 |
| LDRLLFKRNICHQAI  | POSSIBLE GLYCOSYL TRANSFERASE CAB05419                                       | -0.073 | 0.162 |
| MGRDIKVQFQSGGNN  | CAB10044.1; SECRETED ANTIGEN 85-B FBPB (85B)                                 | -0.007 | 0.162 |
| GVVLAGGESRRMGRD  | CAA16030.1; PROBABLE MOLYBDOPTERIN-GUANINE DINUCLEOTIDE BIOSYNTHESIS PROTEIN | -0.174 | 0.161 |
| SDRRAPKAVKEYARK  | PROBABLE ISOCITRATE DEHYDROGENASE CAA16247                                   | -0.015 | 0.161 |
| AMAVVGGALLYLTIM  | CAB06237.1; CONSERVED HYPOTHETICAL PROTEIN                                   | -0.158 | 0.159 |
| TAQTLQAFLHWAITD  | PERIPLASMIC PHOSPHATE-BINDING LIPOPROTEIN PSTS1 YP_177770                    | -0.045 | 0.159 |
| GTGNIGFFNTGTGNW  | YP_177963; PPE FAMILY PROTEIN                                                | 0.372  | 0.158 |
| DVVATIEYLVRLEHG  | RNA POLYMERASE BETA-SUBUNIT AAA21416                                         | -0.067 | 0.158 |
| RAPTESTRRCWTLVS  | MYCOBACTERIUM BOVIS MYCOCEROSIC ACID SYNTHASE GENE; M95808                   | 0.014  | 0.157 |
| IGTYCPAVIAPLMPN  | CAB10947.1; PROBABLE LIPOPROTEIN LPRJ                                        | -0.132 | 0.156 |
| IGICAPILGGYPAYL  | MYCOBACTERIUM BOVIS ACYL-COA SYNTHASE GENE; U75685                           | 0.029  | 0.156 |
| PPQPTQYRQPYEALG  | CAA17582.1; PROBABLE SERINE PROTEASE PEPD                                    | -0.264 | 0.155 |
| ILGGYPAVLTSPVSF  | MYCOBACTERIUM BOVIS ACYL-COA SYNTHASE GENE; U75685                           | 0.023  | 0.154 |
| QVGSQFGPYQLLRLL  | TRANSMEMBRANE SERINE/THREONINE-PROTEIN KINASE D PKND NP_215446               | -0.175 | 0.154 |
| DALARRIGRHGLIGF  | PUTATIVE CYCLOPROPANE-FATTY-ACYL-PHOSPHOLIPID SYNTHASE UFAA1 NP_854118       | -0.025 | 0.150 |
| VRLPDGNGIELCRDL  | TWO COMPONENT TRANSCRIPTIONAL REGULATORY PROTEIN DEVR NP_217649              | -0.163 | 0.150 |
| LPDVIWTRLFGVRLV  | POSSIBLE GLYCOSYL TRANSFERASE CAB05415                                       | -0.120 | 0.150 |
| NNKAALPEVNPCKPP  | MTB48 AAK31576                                                               | -0.031 | 0.150 |
| FALAQSLDPSRYEVH  | POSSIBLE GLYCOSYL TRANSFERASE CAB05415                                       | -0.241 | 0.150 |
| LLDNDKSPSRKTGEL  | PROBABLE ISOCITRATE DEHYDROGENASE CAA16247                                   | -0.072 | 0.149 |
| NYEYAIVNNRQKDAA  | PERIPLASMIC PHOSPHATE-BINDING LIPOPROTEIN PSTS1 YP_177770                    | -0.122 | 0.149 |
| YHPQQFIYAGLSAL   | CAB10044.1; SECRETED ANTIGEN 85-B FBPB (85B)                                 | -0.088 | 0.149 |
| HTHDGTRTWRTGRQA  | CAB10947.1; PROBABLE LIPOPROTEIN LPRJ                                        | 0.423  | 0.147 |
| SYNTGSLNAGTNTG   | YP_177963; PPE FAMILY PROTEIN                                                | 0.034  | 0.146 |
| SLPAALRACACQPH   | MYCOBACTERIUM BOVIS ACYL-COA SYNTHASE GENE; U75685                           | -0.043 | 0.144 |
| LRAQDDYNGWDINTP  | CAB10044.1; SECRETED ANTIGEN 85-B FBPB (85B)                                 | -0.163 | 0.144 |
| QHVARRPGESPPSII  | MYCOBACTERIUM BOVIS ACYL-COA SYNTHASE GENE; U75685                           | 0.176  | 0.144 |
| TGIANSNGNVDTGALM | YP_177963; PPE FAMILY PROTEIN                                                | -0.266 | 0.143 |
| ASPYVAWMSVTAGQA  | CAE55371.1; PPE FAMILY PROTEIN                                               | -0.030 | 0.143 |
| TSAEFTRRRYAEITN  | CONSERVED HYPOTHETICAL PROTEIN CAB08634                                      | -0.075 | 0.141 |
| GLNVGITIPEFPIHW  | YP_177963; PPE FAMILY PROTEIN                                                | 0.061  | 0.141 |
| LDAVERREATWRDVR  | CONSERVED HYPOTHETICAL PROTEIN CAB08634                                      | 0.465  | 0.141 |
| EDLHRCHEHRPELAM  | PROBABLE ISOCITRATE DEHYDROGENASE CAA16247                                   | 0.095  | 0.141 |
| AAVDAADKVLGYRNW  | MTB81 (publication)                                                          | -0.085 | 0.140 |
| FGLQLELTEGMRFDK  | 60 kDa chaperonin 2 P0A521                                                   | 0.161  | 0.136 |
| QQWNFAGIEAAASAI  | CAE55648                                                                     | -0.112 | 0.136 |
| VGNGYWQKPDDESERT | MYCOBACTERIUM BOVIS ACYL-COA SYNTHASE GENE; U75685                           | -0.230 | 0.136 |

|                  |                                                                              |        |       |
|------------------|------------------------------------------------------------------------------|--------|-------|
| PYRPHENELIKKVKVT | PROBABLE ISOCITRATE DEHYDROGENASE CAA16247                                   | 0.019  | 0.134 |
| ADGFVSRSEGCAMVLL | MYCOBACTERIUM BOVIS MYCOCEROSIC ACID SYNTHASE GENE; M95808                   | 0.114  | 0.132 |
| EFPIHWTSTGGIGPI  | YP_177963; PPE FAMILY PROTEIN                                                | -0.050 | 0.132 |
| KWPPTPGSPLFPDLP  | CAB06237.1; CONSERVED HYPOTHETICAL PROTEIN                                   | -0.129 | 0.131 |
| LNMEALERAGAGVLL  | POSSIBLE GLYCOSYL TRANSFERASE CAB05418                                       | -0.042 | 0.131 |
| VSADYITVMHDNGTR  | RNA POLYMERASE BETA-SUBUNIT AAA21416                                         | -0.082 | 0.131 |
| FAHWPRAGLFPVSAI  | MYCOBACTERIUM BOVIS MYCOCEROSIC ACID SYNTHASE GENE; M95808                   | -0.106 | 0.131 |
| ARVPPYKTAGLGLVL  | MCE-FAMILY PROTEIN MCE1AYP_177701                                            | 0.067  | 0.130 |
| PTYDLPANHEYLGVP  | POSSIBLE GLYCOSYL TRANSFERASE CAB05415                                       | 0.109  | 0.130 |
| FPSFAGLRPTFDTRL  | CAA17245.1; HEAT SHOCK PROTEIN HSPX                                          | 0.182  | 0.129 |
| AQTLENLFFKEKRY   | RNA POLYMERASE BETA-SUBUNIT AAA21416                                         | 0.059  | 0.129 |
| WSPQARRRFPDPV    | POSSIBLE GLYCOSYL TRANSFERASE CAB05418                                       | -0.016 | 0.128 |
| PDRSAERCGSPAOWL  | PERIPLASMIC PHOSPHATE-BINDING LIPOPROTEIN PSTS2 YP_177769                    | 0.058  | 0.126 |
| FRGEFTPKTQLTMLS  | MCE-FAMILY PROTEIN MCE1AYP_177701                                            | -0.177 | 0.125 |
| SLAPYNHMEVGSPIA  | MCE-FAMILY PROTEIN MCE1AYP_177701                                            | 0.171  | 0.125 |
| EEQPSDMTNHPRYSP  | CAA17582.1; PROBABLE SERINE PROTEASE PEPD                                    | 0.389  | 0.125 |
| LTYEHLRDDMVAAC   | CAA17111.1; PROBABLE ISOCITRATE DEHYDROGENASE                                | -0.235 | 0.124 |
| PAEFLENFVRSSNLK  | CAB10044.1; SECRETED ANTIGEN 85-B FBPB (85B)                                 | -0.334 | 0.123 |
| AMAAQLQAVPGAAQY  | LOW MOLECULAR WEIGHT T-CELL ANTIGEN TB8.4 NP_215690                          | -0.168 | 0.123 |
| KEAKDLVDGAPKLL   | CAB07109.1; PROBABLE 50S RIBOSOMAL PROTEIN L7/L12 RPLL                       | -0.173 | 0.122 |
| QGNVTSHSLDDEGK   | CAE55648                                                                     | -0.122 | 0.121 |
| VRPFVLARSLDPSRY  | POSSIBLE GLYCOSYL TRANSFERASE CAB05418                                       | 0.051  | 0.120 |
| LARIMGASITSDGFH  | 3-OXOACYL-[ACYL-CARRIER PROTEIN] SYNTHASE 2 KASB CAA94642                    | 0.152  | 0.120 |
| LLVAIMPWEGHNYED  | RNA POLYMERASE BETA-SUBUNIT AAA21416                                         | -0.184 | 0.119 |
| GRLEMLTTLPKFPG   | CAB06237.1; CONSERVED HYPOTHETICAL PROTEIN                                   | -0.512 | 0.119 |
| SNNVGFGNMGNGIG   | YP_177963; PPE FAMILY PROTEIN                                                | 0.327  | 0.118 |
| VGKGMWMTMLMADM   | MTB81 (publication)                                                          | -0.166 | 0.118 |
| GVAANLGRAASVGS   | CAE55371.1; PPE FAMILY PROTEIN                                               | -0.150 | 0.117 |
| IPEDGGVVLGMYNFK  | CAA17111.1; PROBABLE ISOCITRATE DEHYDROGENASE                                | -0.128 | 0.117 |
| AAAEVFGAAEVRDI   | MYCOBACTERIUM BOVIS MYCOCEROSIC ACID SYNTHASE GENE; M95808                   | 0.247  | 0.116 |
| AMLGHAGDMAGYAGT  | CAA17363.1; LOW MOLECULAR WEIGHT PROTEIN ANTIGEN 7 ESXH                      | -0.106 | 0.116 |
| TWYSVGRIYNAGDLF  | YP_177963; PPE FAMILY PROTEIN                                                | 0.048  | 0.114 |
| LSKTVEVTADAASIM  | CONSERVED HYPOTHETICAL PROTEIN TB18.5CAD93033                                | -0.118 | 0.113 |
| ACRPFDRDRDGFVFG  | 3-OXOACYL-[ACYL-CARRIER PROTEIN] SYNTHASE 2 KASB CAA94642                    | 0.114  | 0.112 |
| GYISGYFVTDPEROE  | 60 kDa chaperonin 2 P0A521                                                   | 0.024  | 0.112 |
| NGYGDFQHTTEEAIR  | CONSERVED HYPOTHETICAL PROTEIN CAB08634                                      | 0.160  | 0.111 |
| PTFAVHDTLFYCVAN  | SECRETED L-ALANINE DEHYDROGENASE ALD CAA15575                                | -0.027 | 0.110 |
| EYLVRLHEGQTTMTV  | RNA POLYMERASE BETA-SUBUNIT AAA21416                                         | -0.062 | 0.110 |
| EVHFACDPRYNQLLG  | POSSIBLE GLYCOSYL TRANSFERASE CAB05415                                       | 0.079  | 0.110 |
| TAMADALNGHHPGDV  | CAB09453.1; PROBABLE SERINE PROTEASE PEPA                                    | 0.455  | 0.110 |
| AEAGVRLAFVCAVDM  | CAA16030.1; PROBABLE MOLYBDOPTERIN-GUANINE DINUCLEOTIDE BIOSYNTHESIS PROTEIN | -0.123 | 0.110 |
| GRWDEDGEKRIPLDV  | CAB01005.1; 10 KDA CHAPERONIN GROES                                          | 0.256  | 0.110 |
| AAPSIAPANMPGSGV  | CAA17582.1; PROBABLE SERINE PROTEASE PEPD                                    | -0.186 | 0.107 |
| RDQVIPPTLNLVNL   | 3-OXOACYL-[ACYL-CARRIER PROTEIN] SYNTHASE 2 KASB CAA94642                    | 0.149  | 0.106 |
| RISGMPVLFWLDPYR  | PROBABLE ISOCITRATE DEHYDROGENASE CAA16247                                   | -0.154 | 0.106 |
| TWRDVRKHLESRDAK  | CONSERVED HYPOTHETICAL PROTEIN CAB08634                                      | 0.438  | 0.106 |
| GEVLLTENVEAGDIW  | PROBABLE ISOCITRATE DEHYDROGENASE CAA16247                                   | 0.120  | 0.104 |
| LELSDFVKKFEETFE  | CAB07109.1; PROBABLE 50S RIBOSOMAL PROTEIN L7/L12 RPLL                       | 0.179  | 0.104 |
| VNLVDLTNSGQYTVF  | CAA98373.1; MAJOR SECRETED IMMUNOGENIC PROTEIN                               | 0.127  | 0.104 |
| FEEAPEMTSAGGLLE  | CAE55371.1; PPE FAMILY PROTEIN                                               | 0.168  | 0.103 |
| IAVTYNLNSVSSLNL  | PERIPLASMIC PHOSPHATE-BINDING LIPOPROTEIN PSTS3 YP_177768                    | -0.095 | 0.102 |
| TSQLSQFMDQNNPLS  | RNA POLYMERASE BETA-SUBUNIT AAA21416                                         | -0.095 | 0.102 |
| ARDIMNAGVTCVGEH  | HYPOTHETICAL PROTEIN RV2626C NP_217142                                       | 0.109  | 0.101 |
| AMILAAYHPQQFIYA  | CAB10044.1; SECRETED ANTIGEN 85-B FBPB (85B)                                 | -0.184 | 0.101 |
| EKVAKEAADEAKAKL  | CAB07109.1; PROBABLE 50S RIBOSOMAL PROTEIN L7/L12 RPLL                       | 0.249  | 0.100 |
| YPADPKTDQEKAKE   | PROBABLE ISOCITRATE DEHYDROGENASE CAA16247                                   | -0.161 | 0.100 |
| KLLSSILTYHVIAGQ  | CAA98350.1; CELL SURFACE LIPOPROTEIN MPT83                                   | -0.199 | 0.099 |
| AGFPQHIESALRLVC  | POSSIBLE GLYCOSYL TRANSFERASE CAB05418                                       | -0.316 | 0.098 |
| CALGSAKSNMGGHSTA | MYCOBACTERIUM BOVIS MYCOCEROSIC ACID SYNTHASE GENE; M95808                   | -0.064 | 0.097 |
| NLVDLTNGGEYTVFA  | CAA98350.1; CELL SURFACE LIPOPROTEIN MPT83                                   | -0.007 | 0.097 |
| SDALRQTARQLATWV  | MYCOBACTERIUM BOVIS MYCOCEROSIC ACID SYNTHASE GENE; M95808                   | -0.046 | 0.097 |
| AVHDTLFYCVANMPA  | SECRETED L-ALANINE DEHYDROGENASE ALD CAA15575                                | -0.177 | 0.095 |
| TAAAYQMREHDIGAL  | HYPOTHETICAL PROTEIN RV2626C NP_217142                                       | -0.147 | 0.095 |
| VTRAKVRRERMGHIE  | RNA POLYMERASE BETA-SUBUNIT AAA21417                                         | 0.272  | 0.095 |
| CATITPDEARVEEFN  | CAA17111.1; PROBABLE ISOCITRATE DEHYDROGENASE                                | 0.333  | 0.095 |

|                  |                                                                              |        |       |
|------------------|------------------------------------------------------------------------------|--------|-------|
| GLTVAVAGAAILVAG  | LIPOPROTEIN LPQH PRECURSOR P0A5J0                                            | 0.017  | 0.095 |
| IDHFGNRRRLRTVGEL | RNA POLYMERASE BETA-SUBUNIT AAA21416                                         | 0.240  | 0.094 |
| IAAHLMDPAPQPSQL  | TRANSMEMBRANE SERINE/THREONINE-PROTEIN KINASE D PKND NP_215446               | -0.091 | 0.092 |
| QWSYGEVKKPETINY  | RNA POLYMERASE BETA'-SUBUNIT AAA21417                                        | -0.174 | 0.092 |
| IDKWHRRRVIEPIDM  | MTB81 (publication)                                                          | 0.315  | 0.091 |
| IMNAGVTCVGEHETL  | HYPOTHETICAL PROTEIN RV2626C NP_217142                                       | 0.446  | 0.090 |
| LDQYGSIPLPKSFQA  | PERIPLASMIC PHOSPHATE-BINDING LIPOPROTEIN PSTS2 YP_177769                    | -0.150 | 0.090 |
| QNAGGTHPTTTYKAF  | CAA98382.1; IMMUNOGENIC PROTEIN MPT64                                        | 0.022  | 0.090 |
| GLPSIPNLPGLPGL   | CAB06237.1; CONSERVED HYPOTHETICAL PROTEIN                                   | -0.336 | 0.090 |
| PDWAARLPDELLEAH  | RNA POLYMERASE BETA-SUBUNIT AAA21416                                         | -0.025 | 0.088 |
| VDGANDDWNPAKRG   | POSSIBLE HEMOLYSIN CAA16235                                                  | -0.072 | 0.086 |
| LAALPDFLGGFAGLP  | CAB06237.1; CONSERVED HYPOTHETICAL PROTEIN                                   | -0.082 | 0.085 |
| GLGNAGSGNVGFGNM  | YP_177963; PPE FAMILY PROTEIN                                                | -0.167 | 0.085 |
| RRVIEPIDMDAYRQF  | MTB81 (publication)                                                          | -0.078 | 0.084 |
| VSTANATVYMIDSVL  | CAA98373.1; MAJOR SECRETED IMMUNOGENIC PROTEIN                               | -0.280 | 0.082 |
| GTSVLSWLSHDQVHN  | MYCOBACTERIUM BOVIS MYCOCEROSIC ACID SYNTHASE GENE; M95808                   | -0.051 | 0.082 |
| IGELDVIALLYASIA  | PPE FAMILY PROTEIN CAE55334                                                  | -0.061 | 0.080 |
| AGASRTDMEGTFARP  | 3-OXOACYL-[ACYL-CARRIER PROTEIN] SYNTHASE 2 KASB CAA94642                    | -0.193 | 0.080 |
| QDLPLLPLRAIPLL   | PPE FAMILY PROTEIN CAE55504                                                  | -0.482 | 0.078 |
| SYNTGSFNVGDTNTG  | YP_177963; PPE FAMILY PROTEIN                                                | -0.108 | 0.078 |
| NQAISMIDGPAPDGY  | PERIPLASMIC PHOSPHATE-BINDING LIPOPROTEIN PSTS1 YP_177770                    | -0.050 | 0.078 |
| DTVIYSKYGGTEIKY  | CAB01005.1; 10 KDA CHAPERONIN GROES                                          | 0.094  | 0.077 |
| LPVEDMPFLADGTPV  | RNA POLYMERASE BETA-SUBUNIT AAA21416                                         | -0.161 | 0.076 |
| HEGALLSERVATDLG  | SECRETED L-ALANINE DEHYDROGENASE ALD CAA15575                                | -0.231 | 0.076 |
| RMTTQDVEAITPQTL  | RNA POLYMERASE BETA-SUBUNIT AAA21416                                         | -0.001 | 0.075 |
| YVITSVDEEMRHNEL  | RNA POLYMERASE BETA'-SUBUNIT AAA21417                                        | 0.070  | 0.075 |
| YSSKTINLCAPDDPI  | PROBABLE CUTINASE PRECURSOR CFP21 NP_216500                                  | -0.080 | 0.073 |
| SGTHESNTMAMLARD  | CAA16104.1; SECRETED ESAT-6 LIKE PROTEIN ESXR                                | -0.077 | 0.073 |
| TDQEKAIKERYARCL  | PROBABLE ISOCITRATE DEHYDROGENASE CAA16247                                   | 0.193  | 0.072 |
| LGPVHIDQIDIPGMS  | YP_177963; PPE FAMILY PROTEIN                                                | -0.190 | 0.072 |
| NTGGFNPGSINTGWF  | YP_177963; PPE FAMILY PROTEIN                                                | -0.036 | 0.072 |
| GGPVAIAQAITMPHHR | PUTATIVE CYCLOPROPANE-FATTY-ACYL-PHOSPHOLIPID SYNTHASE UFAA1 NP_854118       | 0.052  | 0.070 |
| AMEDGYRVFADVSPH  | MYCOBACTERIUM BOVIS MYCOCEROSIC ACID SYNTHASE GENE; M95808                   | -0.027 | 0.069 |
| NTGGFNPGNVNTGWL  | YP_177963; PPE FAMILY PROTEIN                                                | 0.143  | 0.069 |
| KYIFPGGLLPSTQAI  | PUTATIVE CYCLOPROPANE-FATTY-ACYL-PHOSPHOLIPID SYNTHASE UFAA1 NP_854118       | 0.056  | 0.068 |
| EGWGKSPGFGTTVDF  | PERIPLASMIC PHOSPHATE-BINDING LIPOPROTEIN PSTS1 YP_177770                    | -0.156 | 0.067 |
| FAYLVDFGIARAASD  | TRANSMEMBRANE SERINE/THREONINE-PROTEIN KINASE D PKND NP_215446               | -0.112 | 0.066 |
| MTEKGTFIINGTERV  | RNA POLYMERASE BETA-SUBUNIT AAA21416                                         | -0.240 | 0.065 |
| LAEPGGSFNTAVASV  | CONSERVED HYPOTHETICAL PROTEIN CAA15739                                      | 0.106  | 0.065 |
| ATGNILRDYLTDLFP  | PROBABLE ISOCITRATE DEHYDROGENASE CAA16247                                   | -0.581 | 0.064 |
| IEEVSADYITVMHDN  | RNA POLYMERASE BETA-SUBUNIT AAA21416                                         | -0.045 | 0.063 |
| ADDEGYPKRARM LMD | CONSERVED HYPOTHETICAL PROTEIN TB16.3CAD97060                                | 0.173  | 0.063 |
| GFSFGYPIPLFAVG   | YP_177963; PPE FAMILY PROTEIN                                                | -0.094 | 0.061 |
| PYVLELADHGWRAC   | SECRETED L-ALANINE DEHYDROGENASE ALD CAA15575                                | 0.137  | 0.061 |
| SPNGTIRNILGGTIF  | CAA17111.1; PROBABLE ISOCITRATE DEHYDROGENASE                                | -0.112 | 0.061 |
| AMTTALATDAETTWK  | 3-OXOACYL-[ACYL-CARRIER PROTEIN] SYNTHASE 2 KASB CAA94642                    | -0.108 | 0.061 |
| LAGGESRRMGRDKAT  | CAA16030.1; PROBABLE MOLYBDOPTERIN-GUANINE DINUCLEOTIDE BIOSYNTHESIS PROTEIN | 0.496  | 0.060 |
| VVADKPEKEKASVPG  | 60 kDa chaperonin 2 P0A521                                                   | -0.209 | 0.059 |
| LGLFPFRRLTFYYL   | MYCOBACTERIUM BOVIS MYCOCEROSIC ACID SYNTHASE GENE; M95808                   | -0.088 | 0.058 |
| YIAIANAYWSPYAQR  | POSSIBLE GLYCOSYL TRANSFERASE CAB05415                                       | 0.117  | 0.057 |
| IGRHAFGDQYRATNF  | CAA17111.1; PROBABLE ISOCITRATE DEHYDROGENASE                                | -0.171 | 0.056 |
| FADVLIAGFRFPIID  | MYCOBACTERIUM BOVIS MYCOCEROSIC ACID SYNTHASE GENE; M95808                   | -0.177 | 0.056 |
| SSGLLRHAHCPVVII  | HYPOTHETICAL PROTEIN RV2623 NP_217139                                        | -0.148 | 0.054 |
| VISRSEYRQAAARLA  | POSSIBLE GLYCOSYL TRANSFERASE CAB05415                                       | 0.331  | 0.053 |
| TEEAI RMNCRAVADH | CONSERVED HYPOTHETICAL PROTEIN CAB08634                                      | -0.102 | 0.053 |
| RTIDADRSFIEYGLD  | MYCOBACTERIUM BOVIS MYCOCEROSIC ACID SYNTHASE GENE; M95808                   | -0.128 | 0.052 |
| SGSFNNGALWTGDHH  | YP_177963; PPE FAMILY PROTEIN                                                | 0.460  | 0.052 |
| FHSPSDVIVDASMPA  | PROBABLE ISOCITRATE DEHYDROGENASE CAA16247                                   | 0.152  | 0.052 |
| GEAATLAHVVRPFVL  | POSSIBLE GLYCOSYL TRANSFERASE CAB05418                                       | -0.293 | 0.052 |
| GDYTLYADVPELVPT  | POSSIBLE GLYCOSYL TRANSFERASE CAB05418                                       | -0.138 | 0.051 |
| EQPTIIYTLTDEAPL  | PROBABLE ISOCITRATE DEHYDROGENASE CAA16247                                   | -0.139 | 0.050 |
| DIKATTVFGGKYVSL  | MCE-FAMILY PROTEIN MCE1AYP_177701                                            | 0.171  | 0.050 |

|                  |                                                                              |        |       |
|------------------|------------------------------------------------------------------------------|--------|-------|
| AMEDLVRAYHAMSSST | CAA17363.1; LOW MOLECULAR WEIGHT PROTEIN ANTIGEN 7 ESXH                      | -0.131 | 0.049 |
| QEQRAGGACTITVHP  | MYCOBACTERIUM BOVIS MYCOCEROSIC ACID SYNTHASE GENE; M95808                   | 0.019  | 0.049 |
| PITRDLWPAPYLVM   | MCE-FAMILY PROTEIN MCE1AYP_177701                                            | 0.062  | 0.049 |
| VASGNLPALPDMPL   | CONSERVED HYPOTHETICAL PROTEIN CAA15739                                      | -0.149 | 0.048 |
| WAAMGTQLLASEPVF  | MYCOBACTERIUM BOVIS MYCOCEROSIC ACID SYNTHASE GENE; M95808                   | -0.059 | 0.047 |
| FNVGDTNTGGFNPGS  | YP_177963; PPE FAMILY PROTEIN                                                | -0.150 | 0.046 |
| VDVFAHWPRAGLPV   | MYCOBACTERIUM BOVIS MYCOCEROSIC ACID SYNTHASE GENE; M95808                   | -0.088 | 0.046 |
| PDSDMTTAVMRPSKT  | PROBABLE ISOCITRATE DEHYDROGENASE CAA16247                                   | -0.117 | 0.045 |
| LEVPLPPGVLRWQQD  | HYPOTHETICAL PROTEIN RV2623 NP_217139                                        | -0.213 | 0.044 |
| ILPYLDIRLDYYDLG  | CAA17111.1; PROBABLE ISOCITRATE DEHYDROGENASE                                | -0.167 | 0.044 |
| FLALGAGFEDIGIKT  | PROBABLE ISOCITRATE DEHYDROGENASE CAA16247                                   | 0.090  | 0.042 |
| ALSKLTPWKAPPIA   | PPE FAMILY PROTEIN CAE55489                                                  | 0.394  | 0.041 |
| LTNVNSAAGLHAPMQ  | CAA16030.1; PROBABLE MOLYBDOPTERIN-GUANINE DINUCLEOTIDE BIOSYNTHESIS PROTEIN | -0.199 | 0.041 |
| NELVRVYVAQKRKIS  | RNA POLYMERASE BETA-SUBUNIT AAA21416                                         | 0.296  | 0.040 |
| HHDMVPLAQIYNRA   | PPE FAMILY PROTEIN CAE55489                                                  | 0.156  | 0.039 |
| YLDVYQWTLIREGPP  | PUTATIVE CYCLOPROPANE-FATTY-ACYL-PHOSPHOLIPID SYNTHASE UFAA1 NP_854118       | -0.131 | 0.039 |
| VPPPVIENRAELMI   | CAE55371.1; PPE FAMILY PROTEIN                                               | 0.132  | 0.038 |
| AAAAMAAATPYVGW   | PPE FAMILY PROTEIN CAE55334                                                  | -0.094 | 0.037 |
| GDVGTSVLSWLSHDQ  | MYCOBACTERIUM BOVIS MYCOCEROSIC ACID SYNTHASE GENE; M95808                   | 0.127  | 0.036 |
| EAVGYRSWPRYFAAL  | PUTATIVE CYCLOPROPANE-FATTY-ACYL-PHOSPHOLIPID SYNTHASE UFAA1 NP_854118       | 0.079  | 0.036 |
| SSLFKQISDKMLAI   | CAB06237.1; CONSERVED HYPOTHETICAL PROTEIN                                   | -0.100 | 0.034 |
| RVAVSSFGMSGTNVH  | MYCOBACTERIUM BOVIS MYCOCEROSIC ACID SYNTHASE GENE; M95808                   | -0.086 | 0.034 |
| AAALMAKLRGAAEKQ  | TWO COMPONENT TRANSCRIPTIONAL REGULATORY PROTEIN DEVR NP_217649              | 0.008  | 0.033 |
| GNTNTGGFNPNGVNT  | YP_177963; PPE FAMILY PROTEIN                                                | -0.078 | 0.033 |
| TIRVGSFRGRWLDP   | CAA16102.1; ESAT-6 LIKE PROTEIN ESXQ                                         | -0.121 | 0.032 |
| TADGINIYRVLWQAAG | CAB06500.1; IMMUNOGENIC PROTEIN MPT63                                        | 0.050  | 0.031 |
| AKNTPGSITYNEWSF  | PERIPLASMIC PHOSPHATE-BINDING LIPOPROTEIN PSTS3 YP_177768                    | -0.148 | 0.030 |
| GSGVLNFGSGVSGLY  | YP_177963; PPE FAMILY PROTEIN                                                | 0.010  | 0.030 |
| FAVTNDGVIFFFNPG  | CAA98382.1; IMMUNOGENIC PROTEIN MPT64                                        | 0.275  | 0.030 |
| GAANIGDVNLGFGNI  | YP_177963; PPE FAMILY PROTEIN                                                | 0.434  | 0.029 |
| FTTGLANAGSYNTGS  | YP_177963; PPE FAMILY PROTEIN                                                | -0.056 | 0.028 |
| TGIGNGGTGSTGLFN  | YP_177963; PPE FAMILY PROTEIN                                                | 0.453  | 0.028 |
| AGSSPLLAIAAAWDG  | YP_177963; PPE FAMILY PROTEIN                                                | 0.019  | 0.028 |
| TLQAFHLHWAITDGNK | PERIPLASMIC PHOSPHATE-BINDING LIPOPROTEIN PSTS1 YP_177770                    | -0.299 | 0.027 |
| AAPEIQLAVQATPTF  | PPE FAMILY PROTEIN CAE55334                                                  | -0.113 | 0.027 |
| EDRAWTEAVIGNRRR  | MTB48 AAK31576                                                               | 0.103  | 0.025 |
| DVAQANLGEAAGTYV  | CONSERVED HYPOTHETICAL PROTEIN TB9.8 CAD93159                                | -0.161 | 0.025 |
| NTGAFISGNFNSGVL  | YP_177963; PPE FAMILY PROTEIN                                                | 0.107  | 0.024 |
| KADVYGNTRLGLFPF  | MYCOBACTERIUM BOVIS MYCOCEROSIC ACID SYNTHASE GENE; M95808                   | 0.083  | 0.024 |
| LRGLLTELHRAGAAL  | MYCOBACTERIUM BOVIS MYCOCEROSIC ACID SYNTHASE GENE; M95808                   | -0.031 | 0.024 |
| AFQYDGVNDFPKYPL  | PPE FAMILY PROTEIN CAE55504                                                  | 0.047  | 0.023 |
| KADLLVGVNVLSTI   | CAB08889.1; IRON-REGULATED CONSERVED HYPOTHETICAL PROTEIN                    | -0.026 | 0.022 |
| MVSVATAMIPFLEHD  | RNA POLYMERASE BETA-SUBUNIT AAA21416                                         | -0.270 | 0.022 |
| ASAWDGLAEELHAAA  | PPE FAMILY PROTEIN CAE55504                                                  | -0.043 | 0.022 |
| ALLIETEEHAKARG   | 3-OXOACYL-[ACYL-CARRIER PROTEIN] SYNTHASE 2 KASB CAA94642                    | -0.064 | 0.020 |
| AQRRFPLPDVIWTRL  | POSSIBLE GLYCOSYL TRANSFERASE CAB05415                                       | 0.143  | 0.020 |
| LESAITTIMDFEDSV  | MTB81 (publication)                                                          | -0.097 | 0.019 |
| LFDGRSGEPFPYPVT  | RNA POLYMERASE BETA-SUBUNIT AAA21416                                         | -0.173 | 0.017 |
| AQLQAVPGAAQYIGL  | LOW MOLECULAR WEIGHT T-CELL ANTIGEN TB8.4 NP_215690                          | -0.079 | 0.017 |
| DDPFVEEFDLPVRIG  | 3-OXOACYL-[ACYL-CARRIER PROTEIN] SYNTHASE 2 KASB CAA94642                    | 0.006  | 0.017 |
| VDNQCQSILGYVVRW  | MTB81 (publication)                                                          | 0.098  | 0.017 |
| RSLARVYGATPCAL   | MYCOBACTERIUM BOVIS MYCOCEROSIC ACID SYNTHASE GENE; M95808                   | -0.122 | 0.016 |
| RLPGGINSPLDLWES  | MYCOBACTERIUM BOVIS MYCOCEROSIC ACID SYNTHASE GENE; M95808                   | -0.219 | 0.015 |
| RSLRWSWLLSVLAHV  | CAB09453.1; PROBABLE SERINE PROTEASE PEPA                                    | -0.066 | 0.014 |
| VYARVNPFGFIETPY  | RNA POLYMERASE BETA-SUBUNIT AAA21416                                         | 0.271  | 0.013 |
| KMYGADGKLKDTKAV  | PROBABLE ISOCITRATE DEHYDROGENASE CAA16247                                   | -0.090 | 0.013 |
| DPRAPSLFIHRPDAL  | PUTATIVE CYCLOPROPANE-FATTY-ACYL-PHOSPHOLIPID SYNTHASE UFAA1 NP_854118       | -0.096 | 0.013 |
| NSGVSMNTLSSMLK   | CAE55371.1; PPE FAMILY PROTEIN                                               | -0.221 | 0.013 |
| GNMGLGNIGFGNTGT  | YP_177963; PPE FAMILY PROTEIN                                                | 0.625  | 0.012 |
| TLTNITDELIDRDWS  | MYCOBACTERIUM BOVIS MYCOCEROSIC ACID SYNTHASE GENE; M95808                   | -0.041 | 0.012 |
| AGMGNIGLGNAGSGN  | YP_177963; PPE FAMILY PROTEIN                                                | 0.124  | 0.011 |
| HGPASLAMTRAASPY  | PPE FAMILY PROTEIN CAE55504                                                  | -0.203 | 0.011 |

|                  |                                                                        |        |        |
|------------------|------------------------------------------------------------------------|--------|--------|
| IAAAEAEYEQIWAQD  | PPE FAMILY PROTEIN CAE55504                                            | 0.058  | 0.009  |
| FRSGYLDVYQWTLIR  | PUTATIVE CYCLOPROPANE-FATTY-ACYL-PHOSPHOLIPID SYNTHASE UFAA1 NP_854118 | 0.194  | 0.009  |
| GGFLDDVAGFDAEFF  | MYCOBACTERIUM BOVIS MYCOCEROSIC ACID SYNTHASE GENE; M95808             | -0.006 | 0.008  |
| LHAGPRKSALDEEEI  | CONSERVED HYPOTHETICAL PROTEIN CAB08634                                | 0.194  | 0.008  |
| HLMDPAPQPSQLRPG  | TRANSMEMBRANE SERINE/THREONINE-PROTEIN KINASE D PKND NP_215446         | -0.179 | 0.008  |
| MQAYGAAYTLQELLT  | RNA POLYMERASE BETA-SUBUNIT AAA21416                                   | -0.016 | 0.008  |
| ATYEIVCSKYPSQV   | PERIPLASMIC PHOSPHATE-BINDING LIPOPROTEIN PSTS3 YP_177768              | 0.147  | 0.007  |
| LAQIYNNRAERQILI  | PPE FAMILY PROTEIN CAE55489                                            | -0.104 | 0.005  |
| VPIHDYGEINGQFFV  | TRANSMEMBRANE SERINE/THREONINE-PROTEIN KINASE D PKND NP_215446         | -0.123 | 0.003  |
| GNAFNGFGNSGLGLP  | YP_177963; PPE FAMILY PROTEIN                                          | -0.048 | 0.001  |
| VVAVGPGRWDEDEGEK | CAB01005.1; 10 KDA CHAPERONIN GROES                                    | 0.483  | 0.001  |
| EVTRYADIYALACVL  | TRANSMEMBRANE SERINE/THREONINE-PROTEIN KINASE D PKND NP_215446         | -0.137 | 0.001  |
| TGAFGPVVVPIPIVL  | YP_177963; PPE FAMILY PROTEIN                                          | -0.401 | -0.001 |
| LLGPLPFPHPIHTV   | POSSIBLE GLYCOSYL TRANSFERASE CAB05418                                 | 0.109  | -0.001 |
| AEELVFSYDDMRARG  | 3-OXOACYL-[ACYL-CARRIER PROTEIN] SYNTHASE 2 KASB CAA94642              | -0.061 | -0.002 |
| NTARPHWIGLYGNAG  | PPE FAMILY PROTEIN CAE55334                                            | 0.076  | -0.002 |
| VEYVPSSEVDYMDVS  | RNA POLYMERASE BETA-SUBUNIT AAA21416                                   | -0.041 | -0.002 |
| ANMGLGNIGFGNTGT  | YP_177963; PPE FAMILY PROTEIN                                          | 0.298  | -0.003 |
| AYSGYIPILGAPWLA  | MYCOBACTERIUM BOVIS MYCOCEROSIC ACID SYNTHASE GENE; M95808             | -0.248 | -0.004 |
| DRVVFINTGFLDRTG  | MTB81 (publication)                                                    | -0.083 | -0.004 |
| DAFETGVMFSLHVKA  | PROBABLE ISOCITRATE DEHYDROGENASE CAA16247                             | 0.151  | -0.005 |
| FSNGILWRGNYEGLA  | YP_177963; PPE FAMILY PROTEIN                                          | 0.053  | -0.005 |
| GEPFPYPVTVGMYMI  | RNA POLYMERASE BETA-SUBUNIT AAA21416                                   | -0.064 | -0.006 |
| AMIPFLEHDDANRAL  | RNA POLYMERASE BETA-SUBUNIT AAA21416                                   | 0.017  | -0.007 |
| SGAIGPTWYSVGRIY  | YP_177963; PPE FAMILY PROTEIN                                          | 0.095  | -0.007 |
| ITDGNKASFLDQVHF  | PERIPLASMIC PHOSPHATE-BINDING LIPOPROTEIN PSTS1 YP_177770              | 0.067  | -0.007 |
| RDYRLRVSDALSKLT  | PPE FAMILY PROTEIN CAE55489                                            | -0.298 | -0.008 |
| IRQAGVQYSRADEEQ  | CAA17966.1; 10 KDA CULTURE FILTRATE ANTIGEN ESXB                       | 0.156  | -0.009 |
| VMSHQNVVRNFEQLM  | MYCOBACTERIUM BOVIS ACYL-COA SYNTHASE GENE; U75685                     | -0.075 | -0.009 |
| TRIEAVPIAGFAQMR  | 3-OXOACYL-[ACYL-CARRIER PROTEIN] SYNTHASE 2 KASB CAA94642              | -0.188 | -0.010 |
| AAFDKLPAAATIDQLK | CAA98350.1; CELL SURFACE LIPOPROTEIN MPT83                             | -0.047 | -0.010 |
| DNAVFRARMQREADT  | TRANSMEMBRANE SERINE/THREONINE-PROTEIN KINASE D PKND NP_215446         | -0.245 | -0.010 |
| NATVYMIDTVLMPPA  | CAA98350.1; CELL SURFACE LIPOPROTEIN MPT83                             | -0.139 | -0.010 |
| ANVGDMAGYTGTQTS  | CAA16102.1; ESAT-6 LIKE PROTEIN ESXQ                                   | -0.098 | -0.012 |
| VGISQMHVSRLLAKS  | ALTERNATE RNA POLYMERASE SIGMA FACTOR SIGF CAB07069                    | -0.366 | -0.012 |
| GWDPPIPEGLTTGRSC | POSSIBLE HEMOLYSIN CAA16235                                            | -0.014 | -0.014 |
| PLPFPHPHPIHTVPE  | POSSIBLE GLYCOSYL TRANSFERASE CAB05418                                 | -0.055 | -0.016 |
| LLLETSWEAIEHAGL  | MYCOBACTERIUM BOVIS MYCOCEROSIC ACID SYNTHASE GENE; M95808             | 0.016  | -0.017 |
| DADADGFVRSEGCAM  | MYCOBACTERIUM BOVIS MYCOCEROSIC ACID SYNTHASE GENE; M95808             | -0.095 | -0.017 |
| ATSPAAPVTTAAMAD  | CAA98350.1; CELL SURFACE LIPOPROTEIN MPT83                             | 0.212  | -0.017 |
| WLSDHQVHNVAALPG  | MYCOBACTERIUM BOVIS MYCOCEROSIC ACID SYNTHASE GENE; M95808             | -0.213 | -0.019 |
| SADNMREYLAAGAKE  | MTB48 AAK31576                                                         | -0.173 | -0.020 |
| LERLYAENPSARDQI  | MTB48 AAK31576                                                         | -0.100 | -0.020 |
| VGDLGKLPTWTELA   | CAB06237.1; CONSERVED HYPOTHETICAL PROTEIN                             | -0.010 | -0.020 |
| AEFPDYLTEEQRVPD  | PROBABLE ISOCITRATE DEHYDROGENASE CAA16247                             | 0.112  | -0.023 |
| TGSFNVGDNTTGGFN  | YP_177963; PPE FAMILY PROTEIN                                          | -0.149 | -0.023 |
| RAYQSMSTHESNTM   | CAA16104.1; SECRETED ESAT-6 LIKE PROTEIN ESXR                          | -0.078 | -0.024 |
| VYDSRSVEFAEQIRR  | MYCOBACTERIUM BOVIS MYCOCEROSIC ACID SYNTHASE GENE; M95808             | -0.103 | -0.024 |
| VAASDLAYTLARGRR  | MYCOBACTERIUM BOVIS MYCOCEROSIC ACID SYNTHASE GENE; M95808             | -0.192 | -0.024 |
| NPIASIFAWTRGLQH  | CAA17111.1; PROBABLE ISOCITRATE DEHYDROGENASE                          | -0.111 | -0.026 |
| KPPTWWDSLPTDRPI  | POSSIBLE GLYCOSYL TRANSFERASE CAB05415                                 | -0.144 | -0.027 |
| FTLPGERIHVVFRSD  | PERIPLASMIC PHOSPHATE-BINDING LIPOPROTEIN PSTS3 YP_177768              | 0.183  | -0.027 |
| LETSPQFFPFPTGLNS | PPE FAMILY PROTEIN CAE55504                                            | 0.030  | -0.027 |
| DTYSPELFCTIRNFY  | MCE-FAMILY PROTEIN MCE1AYP_177701                                      | -0.067 | -0.027 |
| TALATDAETTWKLLL  | 3-OXOACYL-[ACYL-CARRIER PROTEIN] SYNTHASE 2 KASB CAA94642              | -0.061 | -0.028 |
| SKLMTRIAGAGAMGS  | MYCOBACTERIUM BOVIS MYCOCEROSIC ACID SYNTHASE GENE; M95808             | -0.085 | -0.028 |
| DMEGTFAFPMTELVT  | 3-OXOACYL-[ACYL-CARRIER PROTEIN] SYNTHASE 2 KASB CAA94642              | -0.110 | -0.028 |
| APEMTSAGGLLEQAA  | CAE55371.1; PPE FAMILY PROTEIN                                         | 0.047  | -0.029 |
| ARSLDPSRYEVHFAC  | POSSIBLE GLYCOSYL TRANSFERASE CAB05418                                 | -0.101 | -0.029 |
| TMPHHRMLATRHTQT  | PUTATIVE CYCLOPROPANE-FATTY-ACYL-PHOSPHOLIPID SYNTHASE UFAA1 NP_854118 | -0.293 | -0.029 |
| DIWRMCIVKDAPIRD  | PROBABLE ISOCITRATE DEHYDROGENASE CAA16247                             | 0.098  | -0.029 |

|                  |                                                                              |        |        |
|------------------|------------------------------------------------------------------------------|--------|--------|
| ITLFPQNFNTTFPV   | YP_177963; PPE FAMILY PROTEIN                                                | -0.088 | -0.030 |
| FLDAIADNLEKELAN  | CAA17111.1; PROBABLE ISOCITRATE DEHYDROGENASE                                | -0.226 | -0.031 |
| VRDLIARWEQRDVMA  | MYCOBACTERIUM BOVIS MYCOCEROSIC ACID SYNTHASE GENE; M95808                   | -0.159 | -0.031 |
| YVAWMSVTAGQAELT  | CAE55371.1; PPE FAMILY PROTEIN                                               | 0.357  | -0.032 |
| WTGDHHLVGFYSYI   | YP_177963; PPE FAMILY PROTEIN                                                | 0.018  | -0.032 |
| AFSRPGLPVEYLQVP  | CAB10044.1; SECRETED ANTIGEN 85-B FBPB (85B)                                 | -0.129 | -0.034 |
| TGTGNWGLFNSSSYN  | YP_177963; PPE FAMILY PROTEIN                                                | 0.253  | -0.034 |
| GHNNAVFNPPNGTHS  | CAB10044.1; SECRETED ANTIGEN 85-B FBPB (85B)                                 | -0.080 | -0.035 |
| VGHGDRGPVWVFSGQ  | MYCOBACTERIUM BOVIS MYCOCEROSIC ACID SYNTHASE GENE; M95808                   | 0.094  | -0.035 |
| TGGFNTGNVNTGAFN  | YP_177963; PPE FAMILY PROTEIN                                                | -0.110 | -0.036 |
| KSGTSDNFQKYLDGA  | PERIPLASMIC PHOSPHATE-BINDING LIPOPROTEIN PSTS2 YP_177769                    | 0.546  | -0.036 |
| WWPAVAVGCAQPAQL  | MYCOBACTERIUM BOVIS MYCOCEROSIC ACID SYNTHASE GENE; M95808                   | -0.140 | -0.036 |
| ELMADMVETKIAQPR  | MTB81 (publication)                                                          | -0.242 | -0.036 |
| NAGSGNFGFGNIGNA  | YP_177963; PPE FAMILY PROTEIN                                                | 0.616  | -0.037 |
| VPPRPYVMPHSPAAG  | CAE55371.1; PPE FAMILY PROTEIN                                               | -0.103 | -0.037 |
| DTLVGAGERKMSALV  | CAA16030.1; PROBABLE MOLYBDOPTERIN-GUANINE DINUCLEOTIDE BIOSYNTHESIS PROTEIN | -0.295 | -0.039 |
| AQGMSQDMAQTFTSI  | CONSERVED HYPOTHETICAL PROTEIN CAA15739                                      | 0.170  | -0.040 |
| TTAKIFNGTITVWWD  | PERIPLASMIC PHOSPHATE-BINDING LIPOPROTEIN PSTS2 YP_177769                    | -0.061 | -0.040 |
| GNNSPAVYLLDGLRA  | CAB10044.1; SECRETED ANTIGEN 85-B FBPB (85B)                                 | -0.114 | -0.041 |
| VKDIKGMELARAVKD  | TWO COMPONENT TRANSCRIPTIONAL REGULATORY PROTEIN DEVR NP_217649              | -0.171 | -0.041 |
| FVADYLPGEAAAARS  | POSSIBLE GLYCOSYL TRANSFERASE CAB05415                                       | 0.140  | -0.042 |
| LLGPLPFRHHAIHTI  | POSSIBLE GLYCOSYL TRANSFERASE CAB05415                                       | -0.028 | -0.042 |
| LDGDEMTRVIWKLK   | CAA17111.1; PROBABLE ISOCITRATE DEHYDROGENASE                                | -0.102 | -0.043 |
| VDTQGAVYVADRGNN  | TRANSMEMBRANE SERINE/THREONINE-PROTEIN KINASE D PKND NP_215446               | -0.183 | -0.044 |
| GNVGFNGIGDANFGF  | YP_177963; PPE FAMILY PROTEIN                                                | 0.432  | -0.044 |
| FDAEFFGISEREATS  | MYCOBACTERIUM BOVIS MYCOCEROSIC ACID SYNTHASE GENE; M95808                   | -0.063 | -0.045 |
| ANRTRLASLVAANLL  | PPE FAMILY PROTEIN CAE55504                                                  | 0.125  | -0.046 |
| LQTTDGSITYNEWSF  | PERIPLASMIC PHOSPHATE-BINDING LIPOPROTEIN PSTS2 YP_177769                    | -0.128 | -0.046 |
| RYARCLGSVNPVLR   | PROBABLE ISOCITRATE DEHYDROGENASE CAA16247                                   | -0.027 | -0.047 |
| AEAVTLAHVVRPFAL  | POSSIBLE GLYCOSYL TRANSFERASE CAB05415                                       | -0.205 | -0.048 |
| GNIAEPDTADRLVSA  | MYCOBACTERIUM BOVIS MYCOCEROSIC ACID SYNTHASE GENE; M95808                   | -0.158 | -0.049 |
| PLSGLTHKRRLSALG  | RNA POLYMERASE BETA-SUBUNIT AAA21416                                         | -0.147 | -0.050 |
| IDSDRWPAVAKVPRG  | PUTATIVE CYCLOPROPANE-FATTY-ACYL-PHOSPHOLIPID SYNTHASE UFAA1 NP_854118       | 0.012  | -0.050 |
| DTLNGGEYTVFAPTN  | CAA98350.1; CELL SURFACE LIPOPROTEIN MPT83                                   | -0.120 | -0.050 |
| RILAEFPDYLTTEEQR | PROBABLE ISOCITRATE DEHYDROGENASE CAA16247                                   | -0.044 | -0.051 |
| AAGDFWGGAGSVACQ  | PUTATIVE ESAT-6 LIKE PROTEIN ESXN YP_177838                                  | 0.316  | -0.051 |
| TESTRRCWTLVSSRS  | MYCOBACTERIUM BOVIS MYCOCEROSIC ACID SYNTHASE GENE; M95808                   | -0.096 | -0.052 |
| LLENLFFKEKRYDLA  | RNA POLYMERASE BETA-SUBUNIT AAA21416                                         | 0.043  | -0.052 |
| NSWVDVFAHWPRAG   | MYCOBACTERIUM BOVIS MYCOCEROSIC ACID SYNTHASE GENE; M95808                   | -0.154 | -0.052 |
| RNVRMELLAKSGKTI  | PROBABLE ISOCITRATE DEHYDROGENASE CAA16247                                   | -0.140 | -0.052 |
| TGAGGSAPKHVKQLV  | PROBABLE ISOCITRATE DEHYDROGENASE CAA16247                                   | 0.036  | -0.053 |
| RVYEEFFKAQFEAAG  | CAA17111.1; PROBABLE ISOCITRATE DEHYDROGENASE                                | -0.006 | -0.053 |
| KSHGPQGTECASLSW  | MYCOBACTERIUM BOVIS MYCOCEROSIC ACID SYNTHASE GENE; M95808                   | -0.009 | -0.053 |
| AAQFNASPVAAQSYL  | LOW MOLECULAR WEIGHT T-CELL ANTIGEN TB8.4 NP_215690                          | -0.098 | -0.053 |
| EGVARVLTKPRFRGW  | POSSIBLE HEMOLYSIN-LIKE PROTEIN CAA17201                                     | -0.209 | -0.055 |
| DPDHDGMRVQVRRPG  | MYCOBACTERIUM BOVIS MYCOCEROSIC ACID SYNTHASE GENE; M95808                   | -0.154 | -0.056 |
| DHQVHNVAALPGAAY  | MYCOBACTERIUM BOVIS MYCOCEROSIC ACID SYNTHASE GENE; M95808                   | -0.064 | -0.056 |
| GAPNRVSFAKLREPL  | RNA POLYMERASE BETA-SUBUNIT AAA21416                                         | -0.213 | -0.056 |
| SYNTGSFNAGTNTG   | YP_177963; PPE FAMILY PROTEIN                                                | -0.047 | -0.056 |
| PYEKIGAELVKEVAK  | 60 kDa chaperonin 2 P0A521                                                   | -0.152 | -0.057 |
| KSGKTIVLKPEVPLD  | PROBABLE ISOCITRATE DEHYDROGENASE CAA16247                                   | -0.118 | -0.057 |
| SFNTGIGNGGTGSTG  | YP_177963; PPE FAMILY PROTEIN                                                | 0.437  | -0.057 |
| PASQRDEIIEDLHRC  | PROBABLE ISOCITRATE DEHYDROGENASE CAA16247                                   | -0.137 | -0.058 |
| PPFRLPLLVLNALG   | YP_177963; PPE FAMILY PROTEIN                                                | -0.049 | -0.059 |
| DPRYNQLLGPLPFRH  | POSSIBLE GLYCOSYL TRANSFERASE CAB05415                                       | 0.096  | -0.060 |
| IVPPTPGFGNATATP  | YP_177963; PPE FAMILY PROTEIN                                                | -0.241 | -0.060 |
| HEERRTAVLDPDHDG  | MYCOBACTERIUM BOVIS MYCOCEROSIC ACID SYNTHASE GENE; M95808                   | -0.070 | -0.062 |
| EDEMKEGRYEVRAEL  | CAA17245.1; HEAT SHOCK PROTEIN HSPX                                          | 0.166  | -0.062 |
| GLGLFFASKLAAAGC  | MYCOBACTERIUM BOVIS MYCOCEROSIC ACID SYNTHASE GENE; M95808                   | 0.014  | -0.062 |
| VTPKGETELTPEERL  | RNA POLYMERASE BETA-SUBUNIT AAA21416                                         | -0.096 | -0.062 |
| QAEEYGSMDKTFEIP  | PROBABLE ISOCITRATE DEHYDROGENASE CAA16247                                   | 0.097  | -0.062 |
| LGDNGYIPIDEFKS   | PERIPLASMIC PHOSPHATE-BINDING LIPOPROTEIN PSTS3 YP_177768                    | 0.180  | -0.063 |

|                  |                                                                              |        |        |
|------------------|------------------------------------------------------------------------------|--------|--------|
| LRPTFDTRLMRLEDE  | CAA17245.1; HEAT SHOCK PROTEIN HSPX                                          | 0.148  | -0.064 |
| FNTGLANAGSYNTGS  | YP_177963; PPE FAMILY PROTEIN                                                | -0.197 | -0.064 |
| GESRRMGRDKATLPL  | CAA16030.1; PROBABLE MOLYBDOPTERIN-GUANINE DINUCLEOTIDE BIOSYNTHESIS PROTEIN | 0.359  | -0.065 |
| LLDIYRKLRPGEPT   | RNA POLYMERASE BETA-SUBUNIT AAA21416                                         | -0.511 | -0.065 |
| TDDQVTIDAAYAIAKK | CAA17111.1; PROBABLE ISOCITRATE DEHYDROGENASE                                | -0.087 | -0.065 |
| TVLPFTGLNDPDGVA  | TRANSMEMBRANE SERINE/THREONINE-PROTEIN KINASE D PKND NP_215446               | -0.144 | -0.065 |
| RIGGHLLLEFDHQLT  | 3-OXOACYL-[ACYL-CARRIER PROTEIN] SYNTHASE 2 KASB CAA94642                    | -0.073 | -0.065 |
| TELTPEERLLRAIFG  | RNA POLYMERASE BETA-SUBUNIT AAA21416                                         | -0.543 | -0.066 |
| QVVLNALADLPVTVI  | POSSIBLE GLYCOSYL TRANSFERASE CAB05418                                       | -0.454 | -0.066 |
| GNDLVLDTDSFYRPK  | PERIPLASMIC PHOSPHATE-BINDING LIOPROTEIN PSTS3 YP_177768                     | -0.214 | -0.067 |
| IKYNGEYLLSARD    | CAB01005.1; 10 KDA CHAPERONIN GROES                                          | -0.132 | -0.068 |
| ARSTGPYSMITQQPL  | RNA POLYMERASE BETA-SUBUNIT AAA21416                                         | -0.094 | -0.068 |
| LERPVGDSDDCGTIR  | CAA16102.1; ESAT-6 LIKE PROTEIN ESXQ                                         | -0.166 | -0.070 |
| SSGFFNTGGGGSGI   | YP_177963; PPE FAMILY PROTEIN                                                | -0.107 | -0.071 |
| TTMIKTAVAVVAMAA  | CAB06500.1; IMMUNOGENIC PROTEIN MPT63                                        | -0.084 | -0.071 |
| TGNLGLFNSGTGNIG  | YP_177963; PPE FAMILY PROTEIN                                                | 0.347  | -0.072 |
| LGKLPWTWELAALPD  | CAB06237.1; CONSERVED HYPOTHETICAL PROTEIN                                   | -0.148 | -0.072 |
| MTQTQIAERVGISQM  | ALTERNATE RNA POLYMERASE SIGMA FACTOR SIGF CAB07069                          | -0.183 | -0.072 |
| RLHTLLAVLTAAPLL  | PERIPLASMIC PHOSPHATE-BINDING LIOPROTEIN PSTS1 YP_177770                     | 0.002  | -0.074 |
| GGQGFAPIGQAMAI   | CAB09453.1; PROBABLE SERINE PROTEASE PEPA                                    | 0.133  | -0.074 |
| QAASNGAWGKGAGKS  | PERIPLASMIC PHOSPHATE-BINDING LIOPROTEIN PSTS3 YP_177768                     | -0.179 | -0.075 |
| RFPIIDDERPQLGMD  | MYCOBACTERIUM BOVIS MYCOCEROSIC ACID SYNTHASE GENE; M95808                   | -0.257 | -0.075 |
| PLDDGDVIDSMFMSK  | PROBABLE ISOCITRATE DEHYDROGENASE CAA16247                                   | -0.120 | -0.075 |
| LYLAYSEAGFRSGYL  | PUTATIVE CYCLOPROPANE-FATTY-ACYL-PHOSPHOLIPID SYNTHASE UFAA1 NP_854118       | 0.026  | -0.076 |
| FQVPGSIDAITLFP   | YP_177963; PPE FAMILY PROTEIN                                                | -0.353 | -0.076 |
| TIFREPIVISNVPR   | CAA17111.1; PROBABLE ISOCITRATE DEHYDROGENASE                                | -0.093 | -0.077 |
| TPVDIILNTHGVPRR  | RNA POLYMERASE BETA-SUBUNIT AAA21416                                         | -0.012 | -0.078 |
| TGIANSNVNTGAFI   | YP_177963; PPE FAMILY PROTEIN                                                | -0.137 | -0.078 |
| TLLDTYSPFLCTIR   | MCE-FAMILY PROTEIN MCE1AYP_177701                                            | -0.255 | -0.078 |
| RVQAATIKRFADRFA  | MYCOBACTERIUM BOVIS ACYL-COA SYNTHASE GENE; U75685                           | -0.037 | -0.079 |
| YQQRSEKVLTEYNK   | MTB48 AAK31576                                                               | -0.072 | -0.079 |
| MTLLELSDFVKKFEE  | CAB07109.1; PROBABLE 50S RIBOSOMAL PROTEIN L7/L12 RPLL                       | 0.079  | -0.080 |
| EMRYLQSLPAHLRPG  | PPE FAMILY PROTEIN CAE55504                                                  | -0.129 | -0.081 |
| GLELLPFGGRFVEIG  | MYCOBACTERIUM BOVIS MYCOCEROSIC ACID SYNTHASE GENE; M95808                   | -0.070 | -0.082 |
| GVNVNGLSDLYSKI   | PROBABLE ISOCITRATE DEHYDROGENASE CAA16247                                   | 0.215  | -0.082 |
| LPGVSEHLKLNKVL   | PERIPLASMIC PHOSPHATE-BINDING LIOPROTEIN PSTS1 YP_177770                     | -0.278 | -0.082 |
| PGVLRWQQDHGRHLI  | HYPOTHETICAL PROTEIN RV2623 NP_217139                                        | 0.238  | -0.083 |
| ERDLVSRLLTLGW    | MYCOBACTERIUM BOVIS MYCOCEROSIC ACID SYNTHASE GENE; M95808                   | -0.202 | -0.084 |
| MTRIAGAGAMGSVEL  | MYCOBACTERIUM BOVIS MYCOCEROSIC ACID SYNTHASE GENE; M95808                   | -0.270 | -0.084 |
| SAKMLSVVPLMAGGG  | PROBABLE ISOCITRATE DEHYDROGENASE CAA16247                                   | -0.376 | -0.084 |
| RDQARRNIAVHYDLS  | PUTATIVE CYCLOPROPANE-FATTY-ACYL-PHOSPHOLIPID SYNTHASE UFAA1 NP_854118       | 0.180  | -0.084 |
| LFPDWDVAEVAADLQ  | PPE FAMILY PROTEIN CAE55504                                                  | -0.159 | -0.084 |
| PAMTFDTACSSGLMA  | MYCOBACTERIUM BOVIS MYCOCEROSIC ACID SYNTHASE GENE; M95808                   | -0.069 | -0.085 |
| PTQGTTPSSKLGGLW  | CAE55371.1; PPE FAMILY PROTEIN                                               | -0.172 | -0.086 |
| ANIYAGPGPDSMLAA  | PPE FAMILY PROTEIN CAE55489                                                  | -0.158 | -0.086 |
| IEPIDMDAYRQFLTE  | MTB81 (publication)                                                          | -0.119 | -0.088 |
| AGNLGLFNSGTGNIG  | YP_177963; PPE FAMILY PROTEIN                                                | 0.318  | -0.088 |
| TKPVSQDTSPKPTS   | CAA98350.1; CELL SURFACE LIOPROTEIN MPT83                                    | -0.200 | -0.088 |
| TEEDVVATIEYLVRL  | RNA POLYMERASE BETA-SUBUNIT AAA21416                                         | -0.078 | -0.089 |
| PIFGFGGAPGFNDT   | YP_177963; PPE FAMILY PROTEIN                                                | -0.141 | -0.089 |
| RPSYGLAEATVYVAT  | MYCOBACTERIUM BOVIS ACYL-COA SYNTHASE GENE; U75685                           | -0.203 | -0.090 |
| YELNITSATYQSAIP  | CAA98382.1; IMMUNOGENIC PROTEIN MPT64                                        | -0.102 | -0.091 |
| FVTDGKMFIIGRKD   | MYCOBACTERIUM BOVIS ACYL-COA SYNTHASE GENE; U75685                           | -0.037 | -0.091 |
| ACLRAYPQCPLLLHA  | MYCOBACTERIUM BOVIS MYCOCEROSIC ACID SYNTHASE GENE; M95808                   | -0.265 | -0.091 |
| YSPPPQQPGTPGYAQ  | CAA17582.1; PROBABLE SERINE PROTEASE PEPD                                    | -0.215 | -0.092 |
| MGQGNDLVLDTSFFY  | PERIPLASMIC PHOSPHATE-BINDING LIOPROTEIN PSTS2 YP_177769                     | -0.151 | -0.092 |
| LAFVCAVDMPYLTVE  | CAA16030.1; PROBABLE MOLYBDOPTERIN-GUANINE DINUCLEOTIDE BIOSYNTHESIS PROTEIN | -0.275 | -0.094 |
| EDVEGEALSTLVVVK  | 60 kDa chaperonin 2 P0A521                                                   | -0.155 | -0.094 |
| WDSLGEFLALGAGFE  | PROBABLE ISOCITRATE DEHYDROGENASE CAA16247                                   | 0.085  | -0.094 |
| ALPGLPSIPNLPGL   | CAB06237.1; CONSERVED HYPOTHETICAL PROTEIN                                   | -0.359 | -0.094 |
| GARDLDMVNNAGLVC  | CAA98350.1; CELL SURFACE LIOPROTEIN MPT83                                    | -0.196 | -0.095 |
| RSTNFRWGGAFDLDR  | POSSIBLE GLYCOSYL TRANSFERASE CAB05419                                       | 0.140  | -0.096 |

|                  |                                                                             |        |        |
|------------------|-----------------------------------------------------------------------------|--------|--------|
| SLTGAAQRAGLELLP  | MYCOBACTERIUM BOVIS MYCOCEROSIC ACID SYNTHASE GENE; M95808                  | -0.058 | -0.097 |
| VETTSVFRADFLSEL  | CAB01474.1; CONSERVED HYPOTHETICAL PROTEIN CFP17                            | 0.282  | -0.097 |
| NTGFLDRTGDEIHTS  | MTB81 (publication)                                                         | 0.194  | -0.097 |
| PSPPPQPTQYRQPYE  | CAA17582.1; PROBABLE SERINE PROTEASE PEPD                                   | -0.116 | -0.097 |
| VGAQNLGAANAGSGN  | YP_177963; PPE FAMILY PROTEIN                                               | 0.334  | -0.098 |
| GLLDVQTDSEFWLIG  | RNA POLYMERASE BETA-SUBUNIT AAA21416                                        | -0.078 | -0.098 |
| ADPVDVAVINTTCNYG | LOW MOLECULAR WEIGHT T-CELL ANTIGEN TB8.4 NP_215690                         | -0.119 | -0.099 |
| YYAPDSDMTTAVMRP  | PROBABLE ISOCITRATE DEHYDROGENASE CAA16247                                  | -0.206 | -0.099 |
| LMAKLRGAAEKQDPL  | TWO COMPONENT TRANSCRIPTIONAL REGULATORY PROTEIN DEVR NP_217649             | -0.049 | -0.099 |
| IKTAVAVVAMAAIAT  | CAB06500.1; IMMUNOGENIC PROTEIN MPT63                                       | -0.028 | -0.101 |
| APKPILLEKVAKEAAD | CAB07109.1; PROBABLE 50S RIBOSOMAL PROTEIN L7/L12 RPLL                      | -0.842 | -0.101 |
| TLYADVPELVPTYNL  | POSSIBLE GLYCOSYL TRANSFERASE CAB05418                                      | -0.182 | -0.101 |
| CPMVVAPGGTFESIT  | CAB10947.1; PROBABLE LIPOPROTEIN LPRJ                                       | -0.306 | -0.102 |
| VTMPVPEPMVKMLLN  | CONSERVED HYPOTHETICAL PROTEIN TB18.5CAD93033                               | -0.268 | -0.102 |
| MAIAGQIRSGGGSPT  | CAB09453.1; PROBABLE SERINE PROTEASE PEPA                                   | -0.142 | -0.102 |
| FGNTTTAPSSGFFNS  | YP_177963; PPE FAMILY PROTEIN                                               | 0.080  | -0.103 |
| NHLKNVPANAFVADY  | POSSIBLE GLYCOSYL TRANSFERASE CAB05418                                      | -0.231 | -0.103 |
| LVDFGIARAASDPGL  | TRANSMEMBRANE SERINE/THREONINE-PROTEIN KINASE D PKND NP_215446              | -0.310 | -0.104 |
| GLFNSGSFNTGIGNG  | YP_177963; PPE FAMILY PROTEIN                                               | 0.177  | -0.104 |
| AAERPGQGMLGGLPV  | CAE55371.1; PPE FAMILY PROTEIN                                              | -0.185 | -0.105 |
| GVGNIGFANTGSNNI  | YP_177963; PPE FAMILY PROTEIN                                               | 0.376  | -0.105 |
| VGITIEFPIHWTST   | YP_177963; PPE FAMILY PROTEIN                                               | -0.204 | -0.105 |
| GLAGFSFGYPIPLFP  | YP_177963; PPE FAMILY PROTEIN                                               | -0.094 | -0.106 |
| ASGLVIPDTAKEKPQ  | CAB01005.1; 10 KDA CHAPERONIN GROES                                         | -0.173 | -0.106 |
| VLDDLNSRMPQSRHD  | MCE-FAMILY PROTEIN MCE1AYP_177701                                           | -0.172 | -0.106 |
| YLPQHEDARAADILK  | CAB08889.1; IRON-REGULATED CONSERVED HYPOTHETICAL PROTEIN                   | 0.067  | -0.107 |
| IQTVMQQGELFAKQE  | CONSERVED HYPOTHETICAL PROTEIN TB18.5CAD93033                               | 0.067  | -0.107 |
| EAMLDAILAGASGYV  | TWO COMPONENT TRANSCRIPTIONAL REGULATORY PROTEIN DEVR NP_217649             | 0.045  | -0.108 |
| AMTANVGDMAGYTGT  | CAA16102.1; ESAT-6 LIKE PROTEIN ESXQ                                        | -0.133 | -0.108 |
| HSLLAGREQVRHLVR  | MYCOBACTERIUM BOVIS MYCOCEROSIC ACID SYNTHASE GENE; M95808                  | 0.023  | -0.108 |
| GINLSRNASASFEDL  | RNA POLYMERASE BETA-SUBUNIT AAA21416                                        | -0.066 | -0.109 |
| EVPGLLDVQTDSEFW  | RNA POLYMERASE BETA-SUBUNIT AAA21416                                        | -0.091 | -0.109 |
| FLGGFAGLPSLGFGN  | CAB06237.1; CONSERVED HYPOTHETICAL PROTEIN                                  | 0.136  | -0.110 |
| IPIPLGLDIPGLPDF  | CAB06237.1; CONSERVED HYPOTHETICAL PROTEIN                                  | -0.322 | -0.111 |
| PLAGVVLAGGESRRM  | CAA16030.1; PROBABLE MOLYBDOPTEIN-GUANINE DINUCLEOTIDE BIOSYNTHESIS PROTEIN | 0.070  | -0.111 |
| QGELFAKQEQLFSVV  | CONSERVED HYPOTHETICAL PROTEIN TB18.5CAD93033                               | -0.142 | -0.112 |
| NTMAMMARDTAEAAK  | CAA17363.1; LOW MOLECULAR WEIGHT PROTEIN ANTIGEN 7 ESXH                     | -0.016 | -0.112 |
| SQQFDWRYPPSPPPQ  | CAA17582.1; PROBABLE SERINE PROTEASE PEPD                                   | 0.001  | -0.113 |
| RGAWLEFDVDRKDTV  | RNA POLYMERASE BETA-SUBUNIT AAA21416                                        | -0.057 | -0.113 |
| YAINNSFGFGGHNVA  | 3-OXOACYL-[ACYL-CARRIER PROTEIN] SYNTHASE 2 KASB CAA94642                   | -0.030 | -0.114 |
| HRGGWDPIPEGLTTG  | POSSIBLE HEMOLYSIN CAA16235                                                 | -0.137 | -0.115 |
| ILDVDPRIHLIPAN   | MCE-FAMILY PROTEIN MCE1AYP_177701                                           | 0.079  | -0.115 |
| DIPALPGFGNSTELP  | YP_177963; PPE FAMILY PROTEIN                                               | -0.141 | -0.115 |
| TSEGMYGRVVKLATG  | TRANSMEMBRANE SERINE/THREONINE-PROTEIN KINASE D PKND NP_215446              | -0.091 | -0.116 |
| ADVPELVPTYNLNLAN | POSSIBLE GLYCOSYL TRANSFERASE CAB05418                                      | -0.110 | -0.117 |
| GDLIAEAMDKVGNEG  | 60 kDa chaperonin 2 P0A521                                                  | 0.567  | -0.117 |
| GPVWVFSQGGSQWAA  | MYCOBACTERIUM BOVIS MYCOCEROSIC ACID SYNTHASE GENE; M95808                  | 0.096  | -0.118 |
| ISNFHSPSDVIVDAS  | PROBABLE ISOCITRATE DEHYDROGENASE CAA16247                                  | -0.055 | -0.118 |
| QVTIDAAYAIAKKHGV | CAA17111.1; PROBABLE ISOCITRATE DEHYDROGENASE                               | -0.073 | -0.118 |
| VAVRWAARDAELRKI  | HYPOTHETICAL PROTEIN RV2623 NP_217139                                       | -0.108 | -0.119 |
| DGEAGSWLLIDTSNA  | MYCOBACTERIUM BOVIS MYCOCEROSIC ACID SYNTHASE GENE; M95808                  | -0.115 | -0.119 |
| RFVEPRVLVRRKAGE  | RNA POLYMERASE BETA-SUBUNIT AAA21416                                        | -0.136 | -0.120 |
| PELVPTYNLNLANHRY | POSSIBLE GLYCOSYL TRANSFERASE CAB05418                                      | -0.013 | -0.120 |
| ATGVDMANPMSPVNK  | LIPOPROTEIN LPQH PRECURSOR P0A5J0                                           | -0.098 | -0.121 |
| GIAVDEAGTVVYTEH  | TRANSMEMBRANE SERINE/THREONINE-PROTEIN KINASE D PKND NP_215446              | -0.183 | -0.121 |
| PEHAIVQFVKAICSP  | HYPOTHETICAL PROTEIN RV2626C NP_217142                                      | -0.286 | -0.121 |
| QARRRFPLPDVPWTR  | POSSIBLE GLYCOSYL TRANSFERASE CAB05418                                      | -0.142 | -0.122 |
| EIIEDLHRCHEHRPE  | PROBABLE ISOCITRATE DEHYDROGENASE CAA16247                                  | -0.029 | -0.122 |
| SSGFFNTGGGGGSGF  | YP_177963; PPE FAMILY PROTEIN                                               | -0.006 | -0.122 |
| DPITIFPGGFTIDPL  | YP_177963; PPE FAMILY PROTEIN                                               | 0.050  | -0.123 |
| EIGKADVYGNTRLGL  | MYCOBACTERIUM BOVIS MYCOCEROSIC ACID SYNTHASE GENE; M95808                  | 0.027  | -0.123 |

|                  |                                                                |        |        |
|------------------|----------------------------------------------------------------|--------|--------|
| HACTAVAAICHYIAM  | POSSIBLE HEMOLYSIN-LIKE PROTEIN CAA17201                       | -0.214 | -0.124 |
| TDEAPLLATYAFLPI  | PROBABLE ISOCITRATE DEHYDROGENASE CAA16247                     | -0.134 | -0.125 |
| LRQTARQLATWVEEH  | MYCOBACTERIUM BOVIS MYCOCEROSIC ACID SYNTHASE GENE; M95808     | -0.085 | -0.125 |
| MLEGCILADSRQSKT  | RNA POLYMERASE BETA-SUBUNIT AAA21416                           | -0.146 | -0.126 |
| PYIAIANAYWSPQAR  | POSSIBLE GLYCOSYL TRANSFERASE CAB05418                         | 0.028  | -0.126 |
| MEAGPMVRKGTMSQ   | MTB81 (publication)                                            | -0.162 | -0.127 |
| GKILPVEDMPFLADG  | RNA POLYMERASE BETA-SUBUNIT AAA21416                           | -0.154 | -0.127 |
| VGLMAQQAEEYGSND  | PROBABLE ISOCITRATE DEHYDROGENASE CAA16247                     | 0.278  | -0.128 |
| GFAGLPSLGFGNLLS  | CAB06237.1; CONSERVED HYPOTHETICAL PROTEIN                     | 0.061  | -0.128 |
| MAPNFDDSI AFLAAQ | MTB81 (publication)                                            | -0.142 | -0.128 |
| PAKMLRLNAGLGNVG  | YP_177963; PPE FAMILY PROTEIN                                  | 0.291  | -0.128 |
| QTGVYEDLLAAGVAD  | 60 kDa chaperonin 2 P0A521                                     | -0.126 | -0.128 |
| WGGGSLPTIGPLYSS  | PROBABLE CUTINASE PRECURSOR CFP21 NP_216500                    | -0.075 | -0.128 |
| YDGVNDFPKYPLNVF  | PPE FAMILY PROTEIN CAE55504                                    | -0.142 | -0.128 |
| LNLGAANIGDVNLGF  | YP_177963; PPE FAMILY PROTEIN                                  | -0.112 | -0.128 |
| SRMERVVRRMTTQD   | RNA POLYMERASE BETA-SUBUNIT AAA21416                           | -0.243 | -0.128 |
| SGNFGFGNIGNANFG  | YP_177963; PPE FAMILY PROTEIN                                  | 0.327  | -0.129 |
| AGVLLRTERLKSQRV  | POSSIBLE GLYCOSYL TRANSFERASE CAB05415                         | -0.242 | -0.130 |
| ISDEVLADLDERGIV  | RNA POLYMERASE BETA-SUBUNIT AAA21416                           | -0.222 | -0.130 |
| ALYPAGRLVDAPLPA  | MYCOBACTERIUM BOVIS MYCOCEROSIC ACID SYNTHASE GENE; M95808     | -0.151 | -0.130 |
| FKARAAEKPAAPSDRA | MTB81 (publication)                                            | -0.067 | -0.130 |
| SGNVGFGNMGVGNIG  | YP_177963; PPE FAMILY PROTEIN                                  | 0.322  | -0.131 |
| AGVGNIGLGNAGSGN  | YP_177963; PPE FAMILY PROTEIN                                  | 0.115  | -0.131 |
| AGDKKIGIVKVVREI  | CAB07109.1; PROBABLE 50S RIBOSOMAL PROTEIN L7/L12 RPLL         | -0.288 | -0.131 |
| DPERQEAVLEDPYIL  | 60 kDa chaperonin 2 P0A521                                     | -0.145 | -0.132 |
| TDDIDHFGNRRRLRTV | RNA POLYMERASE BETA-SUBUNIT AAA21416                           | 0.192  | -0.132 |
| HARFVAAAAKVNTLL  | CONSERVED HYPOTHETICAL PROTEIN TB9.8 CAD93159                  | -0.095 | -0.132 |
| VSEHLKLNGKVLAAAM | PERIPLASMIC PHOSPHATE-BINDING LIPOPROTEIN PSTS1 YP_177770      | -0.151 | -0.132 |
| DVQTDSEFWLIGSPR  | RNA POLYMERASE BETA-SUBUNIT AAA21416                           | -0.119 | -0.132 |
| LYAENPSARDQILPV  | MTB48 AAK31576                                                 | -0.218 | -0.133 |
| QQRLLLETSWAEIEH  | MYCOBACTERIUM BOVIS MYCOCEROSIC ACID SYNTHASE GENE; M95808     | -0.092 | -0.133 |
| RDRDGFVFGEQGALL  | 3-OXOACYL-[ACYL-CARRIER PROTEIN] SYNTHASE 2 KASB CAA94642      | 0.156  | -0.134 |
| AAVMYSYEGASAAAS  | PPE FAMILY PROTEIN CAE55334                                    | -0.088 | -0.135 |
| VYLTADEEDRHVVAQ  | RNA POLYMERASE BETA-SUBUNIT AAA21416                           | -0.130 | -0.136 |
| TGDEVTYRADIALA   | TRANSMEMBRANE SERINE/THREONINE-PROTEIN KINASE D PKND NP_215446 | -0.088 | -0.136 |
| PLLLAAAGCGSKPPS  | PERIPLASMIC PHOSPHATE-BINDING LIPOPROTEIN PSTS1 YP_177770      | -0.162 | -0.136 |
| AEIGRGSLAAQGLA   | CONSERVED HYPOTHETICAL PROTEIN CAB08634                        | -0.047 | -0.136 |
| FFGVPRVSIYRLYR   | POSSIBLE GLYCOSYL TRANSFERASE CAB05418                         | -0.112 | -0.136 |
| GLWPPKLPDIPGL    | CAB06237.1; CONSERVED HYPOTHETICAL PROTEIN                     | -0.097 | -0.137 |
| LAALGDVYADAAPDL  | MCE-FAMILY PROTEIN MCE1AYP_177701                              | -0.198 | -0.137 |
| NVDLVALHAWSDVDV  | HYPOTHETICAL PROTEIN RV2623 NP_217139                          | -0.136 | -0.137 |
| VPGWTKPIVIGRHAF  | CAA17111.1; PROBABLE ISOCITRATE DEHYDROGENASE                  | -0.086 | -0.137 |
| GLGNIGNANVGFNI   | YP_177963; PPE FAMILY PROTEIN                                  | 0.375  | -0.138 |
| KDGLFCEKIFGPTRD  | RNA POLYMERASE BETA-SUBUNIT AAA21417                           | -0.192 | -0.138 |
| SLSVYARVNPFGFIE  | RNA POLYMERASE BETA-SUBUNIT AAA21416                           | -0.030 | -0.139 |
| VDGAPKPLLEKVAKE  | CAB07109.1; PROBABLE 50S RIBOSOMAL PROTEIN L7/L12 RPLL         | -0.150 | -0.139 |
| AHVVRPFVLARSLDP  | POSSIBLE GLYCOSYL TRANSFERASE CAB05418                         | -0.203 | -0.139 |
| MTTPGKLNKARVPPY  | MCE-FAMILY PROTEIN MCE1AYP_177701                              | 0.113  | -0.139 |
| SRTDMEGTFA RPMTE | 3-OXOACYL-[ACYL-CARRIER PROTEIN] SYNTHASE 2 KASB CAA94642      | -0.130 | -0.140 |
| KVYQNAGGTHPTTTY  | CAA98382.1; IMMUNOGENIC PROTEIN MPT64                          | -0.116 | -0.140 |
| LFDIHELNVNIGPFR  | YP_177963; PPE FAMILY PROTEIN                                  | -0.122 | -0.141 |
| NSTELPSSGFFNTGG  | YP_177963; PPE FAMILY PROTEIN                                  | -0.089 | -0.141 |
| SYIITGGLGGLGLFF  | MYCOBACTERIUM BOVIS MYCOCEROSIC ACID SYNTHASE GENE; M95808     | -0.100 | -0.141 |
| AQGRFLFYNTRTLRKY | POSSIBLE GLYCOSYL TRANSFERASE CAB05418                         | -0.107 | -0.141 |
| PEGPWLRGTGDSGFVT | MYCOBACTERIUM BOVIS ACYL-COA SYNTHASE GENE; U75685             | -0.154 | -0.141 |
| PAPDGYPIINYEYAI  | PERIPLASMIC PHOSPHATE-BINDING LIPOPROTEIN PSTS1 YP_177770      | -0.221 | -0.142 |
| AHAGDMAGYAGTLQS  | CAA16104.1; SECRETED ESAT-6 LIKE PROTEIN ESXR                  | -0.105 | -0.142 |
| RTGDSGFVTDGKMF   | MYCOBACTERIUM BOVIS ACYL-COA SYNTHASE GENE; U75685             | -0.058 | -0.144 |
| AQAASLEAEHQAIVR  | PUTATIVE ESAT-6 LIKE PROTEIN ESXN YP_177838                    | -0.022 | -0.144 |
| WEATATVNAIRGSVT  | CAB06500.1; IMMUNOGENIC PROTEIN MPT63                          | 0.006  | -0.144 |
| ELFDDLGVNVNNGLS  | PROBABLE ISOCITRATE DEHYDROGENASE CAA16247                     | -0.065 | -0.145 |
| FLTTEAVVADKPEKE  | 60 kDa chaperonin 2 P0A521                                     | -0.098 | -0.145 |
| LTPKVIATNKARAL   | MYCOBACTERIUM BOVIS MYCOCEROSIC ACID SYNTHASE GENE; M95808     | -0.185 | -0.146 |
| DNLTGIGGLNSGTGN  | YP_177963; PPE FAMILY PROTEIN                                  | 0.077  | -0.147 |
| CCSGVATAAPKTYCE  | CAA98382.1; IMMUNOGENIC PROTEIN MPT64                          | 0.222  | -0.148 |

|                  |                                                                        |        |        |
|------------------|------------------------------------------------------------------------|--------|--------|
| LQRGVADLVPTATLL  | MCE-FAMILY PROTEIN MCE1AYP_177701                                      | -0.099 | -0.149 |
| AFVADYLPGEAAAAAR | POSSIBLE GLYCOSYL TRANSFERASE CAB05418                                 | -0.189 | -0.150 |
| QKPDESERTFGGKIV  | MYCOBACTERIUM BOVIS ACYL-COA SYNTHASE GENE; U75685                     | -0.018 | -0.150 |
| ADVSPHPLLTHAVEQ  | MYCOBACTERIUM BOVIS MYCOCEROSIC ACID SYNTHASE GENE; M95808             | -0.403 | -0.150 |
| DNQSGIGGLNSGTGN  | YP_177963; PPE FAMILY PROTEIN                                          | 0.146  | -0.151 |
| IAADRKILNEIAPDV  | POSSIBLE GLYCOSYL TRANSFERASE CAB05418                                 | -0.379 | -0.151 |
| RHAKAGVMTVPVSACA | 3-OXOACYL-[ACYL-CARRIER PROTEIN] SYNTHASE 2 KASB CAA94642              | -0.057 | -0.152 |
| TYVAADAAAASYTG   | CONSERVED HYPOTHETICAL PROTEIN TB9.8 CAD93159                          | 0.134  | -0.152 |
| GIPYIAIANAYWSPY  | POSSIBLE GLYCOSYL TRANSFERASE CAB05415                                 | 0.082  | -0.152 |
| NALFAGPAKMLRLNA  | YP_177963; PPE FAMILY PROTEIN                                          | -0.211 | -0.152 |
| IYFDVTGSPSTIVAM  | CAB06500.1; IMMUNOGENIC PROTEIN MPT63                                  | -0.139 | -0.153 |
| TRIDPIPLNFDVLSS  | YP_177963; PPE FAMILY PROTEIN                                          | -0.402 | -0.153 |
| RDATDDQVTIDAAYA  | CAA17111.1; PROBABLE ISOCITRATE DEHYDROGENASE                          | -0.069 | -0.154 |
| NFEQLMSGYFADTDG  | MYCOBACTERIUM BOVIS ACYL-COA SYNTHASE GENE; U75685                     | 0.063  | -0.155 |
| QFDPTTMGTVPNVGL  | PROBABLE ISOCITRATE DEHYDROGENASE CAA16247                             | 0.012  | -0.156 |
| SFVRTVSLPVGADSD  | CAA17245.1; HEAT SHOCK PROTEIN HSPX                                    | 0.310  | -0.156 |
| GNWGLFNSGSYNTGI  | YP_177963; PPE FAMILY PROTEIN                                          | 0.213  | -0.157 |
| MKLTTMIKTAVAVVA  | CAB06500.1; IMMUNOGENIC PROTEIN MPT63                                  | -0.133 | -0.157 |
| SSLLTSILTYHVAVG  | CAA98373.1; MAJOR SECRETED IMMUNOGENIC PROTEIN                         | -0.364 | -0.158 |
| TSALSGKLNPDVNLV  | CAA98350.1; CELL SURFACE LIPOPROTEIN MPT83                             | 0.034  | -0.158 |
| SSTHEANTMMAMARD  | CAA17363.1; LOW MOLECULAR WEIGHT PROTEIN ANTIGEN 7 ESXH                | -0.172 | -0.158 |
| VAQQFEAEIGRGSGL  | CONSERVED HYPOTHETICAL PROTEIN CAB08634                                | 0.159  | -0.158 |
| LRISQQLANWLRHG   | MTB81 (publication)                                                    | -0.062 | -0.159 |
| QLAEHFASLADVLTK  | PROBABLE ISOCITRATE DEHYDROGENASE CAA16247                             | -0.179 | -0.160 |
| AFLHWAITDGNKASF  | PERIPLASMIC PHOSPHATE-BINDING LIPOPROTEIN PSTS1 YP_177770              | 0.010  | -0.160 |
| VDPRIYIHLIPANVNA | MCE-FAMILY PROTEIN MCE1AYP_177701                                      | -0.102 | -0.160 |
| GLEEVLYELSPIDF   | RNA POLYMERASE BETA-SUBUNIT AAA21416                                   | -0.190 | -0.160 |
| DAWHGPASLAMTRAA  | PPE FAMILY PROTEIN CAE55504                                            | -0.149 | -0.161 |
| WGPSSDPAWERNDPT  | CAB10044.1; SECRETED ANTIGEN 85-B FBPB (85B)                           | -0.153 | -0.163 |
| FVLARSLDPSRYEVH  | POSSIBLE GLYCOSYL TRANSFERASE CAB05418                                 | -0.012 | -0.163 |
| ARMLMDAAIFKDTLI  | CONSERVED HYPOTHETICAL PROTEIN TB16.3CAD97060                          | -0.145 | -0.163 |
| GAANAGSGNFGFGNI  | YP_177963; PPE FAMILY PROTEIN                                          | 0.618  | -0.164 |
| PAFTLFPGLNIPQN   | YP_177963; PPE FAMILY PROTEIN                                          | -0.107 | -0.165 |
| GYAVPDYPADPKTDQ  | PROBABLE ISOCITRATE DEHYDROGENASE CAA16247                             | -0.107 | -0.165 |
| TLTWSQLYRRTLNV   | MYCOBACTERIUM BOVIS ACYL-COA SYNTHASE GENE; U75685                     | -0.160 | -0.166 |
| STFSRIYQEIINFCK  | PROBABLE ISOCITRATE DEHYDROGENASE CAA16247                             | 0.154  | -0.166 |
| AYAFETLVRHDRAYS  | MYCOBACTERIUM BOVIS MYCOCEROSIC ACID SYNTHASE GENE; M95808             | 0.094  | -0.167 |
| DTDSFYRPKRPGSYP  | PERIPLASMIC PHOSPHATE-BINDING LIPOPROTEIN PSTS3 YP_177768              | -0.067 | -0.167 |
| GKNLLVAMPWEGHN   | RNA POLYMERASE BETA-SUBUNIT AAA21416                                   | -0.242 | -0.167 |
| GGSTIPAIPIGLELN  | YP_177963; PPE FAMILY PROTEIN                                          | -0.162 | -0.168 |
| TLAETGSTLLYPLFN  | PERIPLASMIC PHOSPHATE-BINDING LIPOPROTEIN PSTS1 YP_177770              | 0.054  | -0.168 |
| EIAPDVVVGDNRSL   | POSSIBLE GLYCOSYL TRANSFERASE CAB05418                                 | -0.159 | -0.168 |
| KDTKAVNPSTFSRI   | PROBABLE ISOCITRATE DEHYDROGENASE CAA16247                             | -0.010 | -0.168 |
| SRGSPKFRMELLSLP  | MYCOBACTERIUM BOVIS MYCOCEROSIC ACID SYNTHASE GENE; M95808             | -0.105 | -0.169 |
| FPFRRLTFFYLDLA   | MYCOBACTERIUM BOVIS MYCOCEROSIC ACID SYNTHASE GENE; M95808             | -0.135 | -0.169 |
| PAGRLVDAPLPWATH  | MYCOBACTERIUM BOVIS MYCOCEROSIC ACID SYNTHASE GENE; M95808             | -0.088 | -0.170 |
| RDTDQGVYDAMNRGV  | POSSIBLE GLYCOSYL TRANSFERASE CAB05419                                 | -0.089 | -0.172 |
| SPELFTIRNFYDAD   | MCE-FAMILY PROTEIN MCE1AYP_177701                                      | -0.135 | -0.172 |
| CWAMQAYGAAYTLQE  | RNA POLYMERASE BETA-SUBUNIT AAA21416                                   | -0.138 | -0.172 |
| QHLNMEAVRAGAGV   | POSSIBLE GLYCOSYL TRANSFERASE CAB05415                                 | -0.203 | -0.173 |
| SSASELATAIAFDEA  | HYPOTHETICAL PROTEIN RV2623 NP_217139                                  | -0.080 | -0.173 |
| RLVGIVTEADIARHL  | HYPOTHETICAL PROTEIN RV2626C NP_217142                                 | -0.195 | -0.173 |
| QAAVVRFQEAANKQK  | CAA17966.1; 10 KDA CULTURE FILTRATE ANTIGEN ESXB                       | -0.115 | -0.173 |
| YVAQKRKISDGDKLA  | RNA POLYMERASE BETA-SUBUNIT AAA21416                                   | 0.064  | -0.174 |
| GDFNLGAANLGDNL   | YP_177963; PPE FAMILY PROTEIN                                          | 0.031  | -0.174 |
| AATATATATLLPFEE  | CAE55371.1; PPE FAMILY PROTEIN                                         | -0.206 | -0.174 |
| RCPRRSQSRRAPTES  | MYCOBACTERIUM BOVIS MYCOCEROSIC ACID SYNTHASE GENE; M95808             | 0.160  | -0.175 |
| GFNPGSINTGWFNTE  | YP_177963; PPE FAMILY PROTEIN                                          | -0.182 | -0.175 |
| VYEDLLAAGVADPVK  | 60 kDa chaperonin 2 P0A521                                             | 0.115  | -0.176 |
| MPMGAHQGGGGAKS   | MTB48 AAK31576                                                         | 0.330  | -0.176 |
| DHDTGLDIQIMSQV   | PROBABLE ISOCITRATE DEHYDROGENASE CAA16247                             | 0.003  | -0.176 |
| HDEDSVMPHPQQAPV  | HYPOTHETICAL PROTEIN RV2623 NP_217139                                  | 0.084  | -0.176 |
| TLFPGGLNIPQNAIP  | YP_177963; PPE FAMILY PROTEIN                                          | -0.204 | -0.176 |
| ALITGNFNSGILWRG  | YP_177963; PPE FAMILY PROTEIN                                          | -0.136 | -0.176 |
| FTDLLAQPTPAWTEL  | PUTATIVE CYCLOPROPANE-FATTY-ACYL-PHOSPHOLIPID SYNTHASE UFAA1 NP_854118 | 0.143  | -0.177 |

|                  |                                                                        |        |        |
|------------------|------------------------------------------------------------------------|--------|--------|
| WRGNYEGLAGFSFGY  | YP_177963; PPE FAMILY PROTEIN                                          | 0.096  | -0.177 |
| QVDPILDDLAALAD   | MYCOBACTERIUM BOVIS MYCOCEROSIC ACID SYNTHASE GENE; M95808             | -0.227 | -0.178 |
| NFKESIRDFARASFS  | CAA17111.1; PROBABLE ISOCITRATE DEHYDROGENASE                          | 0.023  | -0.178 |
| PNAGLDVPVNYQNFV  | CAA98382.1; IMMUNOGENIC PROTEIN MPT64                                  | 0.049  | -0.178 |
| AYNINISLPSYYPDQ  | CAA98382.1; IMMUNOGENIC PROTEIN MPT64                                  | -0.047 | -0.179 |
| HRPDALARRIGHGL   | PUTATIVE CYCLOPROPANE-FATTY-ACYL-PHOSPHOLIPID SYNTHASE UFAA1 NP_854118 | -0.117 | -0.179 |
| GEIKSQTVFMGDFPM  | RNA POLYMERASE BETA-SUBUNIT AAA21416                                   | -0.220 | -0.179 |
| EGGEIMITPEEGAYA  | MYCOBACTERIUM BOVIS MYCOCEROSIC ACID SYNTHASE GENE; M95808             | -0.130 | -0.179 |
| GEIWHVHGDNVNGYV  | MYCOBACTERIUM BOVIS ACYL-COA SYNTHASE GENE; U75685                     | 0.089  | -0.180 |
| TGQACQIQMSDPAYN  | CAA98382.1; IMMUNOGENIC PROTEIN MPT64                                  | -0.178 | -0.180 |
| EFITQLGRNFQIYE   | PUTATIVE ESAT-6 LIKE PROTEIN ESXN YP_177838                            | -0.062 | -0.181 |
| AATLHALHYHQVDVA  | MTB81 (publication)                                                    | -0.056 | -0.183 |
| QFTAQIADLDQEYDD  | PPE FAMILY PROTEIN CAE55489                                            | -0.048 | -0.183 |
| LGGQNLGLNLGDGN   | YP_177963; PPE FAMILY PROTEIN                                          | 0.174  | -0.184 |
| GTGSTGLFMGDFTT   | YP_177963; PPE FAMILY PROTEIN                                          | 0.292  | -0.185 |
| FFNSGTGNWGLFNNSG | YP_177963; PPE FAMILY PROTEIN                                          | -0.008 | -0.185 |
| MLKRKAERRLIDGAL  | CONSERVED HYPOTHETICAL PROTEIN TB16.3CAD97060                          | -0.219 | -0.186 |
| ETSWEAIEHAGLDPA  | MYCOBACTERIUM BOVIS MYCOCEROSIC ACID SYNTHASE GENE; M95808             | 0.159  | -0.186 |
| SNTFGLQLELTGEMR  | 60 kDa chaperonin 2 P0A521                                             | -0.207 | -0.186 |
| LGLFNSGTGNIGFFN  | YP_177963; PPE FAMILY PROTEIN                                          | 0.164  | -0.188 |
| GNVGFNGIGDANFGL  | YP_177963; PPE FAMILY PROTEIN                                          | 0.215  | -0.189 |
| SCPNTIVLGGYSQG   | PROBABLE CUTINASE PRECURSOR CFP21 NP_216500                            | -0.076 | -0.190 |
| DLARVGRYKVNKKLG  | RNA POLYMERASE BETA-SUBUNIT AAA21416                                   | -0.163 | -0.190 |
| SLMFVRNVGHLMTND  | MTB81 (publication)                                                    | -0.113 | -0.190 |
| NVLAQLASGNLGSNG  | PPE FAMILY PROTEIN CAE55504                                            | 0.303  | -0.191 |
| AGYLVLRPSWSPTQA  | TRANSMEMBRANE SERINE/THREONINE-PROTEIN KINASE D PKND NP_215446         | -0.117 | -0.193 |
| GQARLAASAFEATLA  | PPE FAMILY PROTEIN CAE55504                                            | -0.150 | -0.193 |
| TDVIPETDGAEGKPT  | MTB81 (publication)                                                    | 0.008  | -0.194 |
| LKIAQGRLFYNTRTL  | POSSIBLE GLYCOSYL TRANSFERASE CAB05418                                 | -0.136 | -0.194 |
| AIVQFVKAICSPMAL  | HYPOTHETICAL PROTEIN RV2626C NP_217142                                 | 0.002  | -0.194 |
| GGTDSLPLPLNPIPL  | PPE FAMILY PROTEIN CAE55504                                            | -0.614 | -0.195 |
| AQPACLRAYPQCPLL  | MYCOBACTERIUM BOVIS MYCOCEROSIC ACID SYNTHASE GENE; M95808             | -0.195 | -0.195 |
| LSRERAGLEVVDVHP  | RNA POLYMERASE BETA-SUBUNIT AAA21416                                   | -0.100 | -0.195 |
| GSSRAPTESTRRCW   | MYCOBACTERIUM BOVIS MYCOCEROSIC ACID SYNTHASE GENE; M95808             | -0.076 | -0.195 |
| IYATLGSSGGKNLL   | POSSIBLE GLYCOSYL TRANSFERASE CAB05418                                 | -0.207 | -0.195 |
| FVTDPERQEAVLEDP  | 60 kDa chaperonin 2 P0A521                                             | -0.184 | -0.195 |
| ILTRFGFSIPQLGFT  | PPE FAMILY PROTEIN CAE55504                                            | -0.179 | -0.196 |
| PASVQGMSSQDPVAVA | CAA98373.1; MAJOR SECRETED IMMUNOGENIC PROTEIN                         | -0.222 | -0.196 |
| GDPIEYRSLARVYGA  | MYCOBACTERIUM BOVIS MYCOCEROSIC ACID SYNTHASE GENE; M95808             | -0.083 | -0.196 |
| LGNVGGGNGVGFNGIG | YP_177963; PPE FAMILY PROTEIN                                          | 0.250  | -0.197 |
| IKIEASDISVAARIL  | PROBABLE ISOCITRATE DEHYDROGENASE CAA16247                             | -0.107 | -0.198 |
| GVGNIGFANTGTNNL  | YP_177963; PPE FAMILY PROTEIN                                          | 0.299  | -0.198 |
| NPGELLPEAAGPTQV  | CAA98382.1; IMMUNOGENIC PROTEIN MPT64                                  | -0.103 | -0.199 |
| VIAAESGFSVTEAIT  | MYCOBACTERIUM BOVIS MYCOCEROSIC ACID SYNTHASE GENE; M95808             | -0.196 | -0.199 |
| ALSAGVGAVAMSLTV  | LOW MOLECULAR WEIGHT T-CELL ANTIGEN TB8.4 NP_215690                    | 0.034  | -0.199 |
| SQFNARTADGINYRV  | CAB06500.1; IMMUNOGENIC PROTEIN MPT63                                  | -0.030 | -0.200 |
| SGNVGWANMGLGNIG  | YP_177963; PPE FAMILY PROTEIN                                          | 0.347  | -0.200 |
| MVDFGALPPEINSAR  | CAE55371.1; PPE FAMILY PROTEIN                                         | 0.072  | -0.201 |
| RSDKSGTSDNFQKYL  | PERIPLASMIC PHOSPHATE-BINDING LIPOPROTEIN PSTS2 YP_177769              | 0.590  | -0.201 |
| ATIPQGEQSTGKIYF  | CAB06500.1; IMMUNOGENIC PROTEIN MPT63                                  | -0.067 | -0.201 |
| WDGVAITLWSQLYR   | MYCOBACTERIUM BOVIS ACYL-COA SYNTHASE GENE; U75685                     | -0.080 | -0.201 |
| ALSTLVVNKIRGTFK  | 60 kDa chaperonin 2 P0A521                                             | -0.249 | -0.201 |
| LYSIGGILYAVRWD   | POSSIBLE HEMOLYSIN-LIKE PROTEIN CAA17201                               | -0.084 | -0.201 |
| PAWERNDPTQQIPKL  | CAB10044.1; SECRETED ANTIGEN 85-B FBPB (85B)                           | -0.186 | -0.202 |
| AGMRREQPLPHGLRG  | MYCOBACTERIUM BOVIS MYCOCEROSIC ACID SYNTHASE GENE; M95808             | 0.230  | -0.202 |
| ITGGLGGLGLFFASK  | MYCOBACTERIUM BOVIS MYCOCEROSIC ACID SYNTHASE GENE; M95808             | -0.283 | -0.203 |
| LGAGNLGNLNLGGGN  | YP_177963; PPE FAMILY PROTEIN                                          | 0.044  | -0.204 |
| TTCNYGQVVAALNAT  | LOW MOLECULAR WEIGHT T-CELL ANTIGEN TB8.4 NP_215690                    | -0.098 | -0.204 |
| FGVRLVKLLYRLERP  | POSSIBLE GLYCOSYL TRANSFERASE CAB05415                                 | -0.187 | -0.205 |
| WLSANRAVKPTGSAA  | CAB10044.1; SECRETED ANTIGEN 85-B FBPB (85B)                           | -0.342 | -0.205 |
| KIVTPSPGTPPEGPWL | MYCOBACTERIUM BOVIS ACYL-COA SYNTHASE GENE; U75685                     | -0.174 | -0.205 |
| GLMTSVLMTADGKTV  | CAA17111.1; PROBABLE ISOCITRATE DEHYDROGENASE                          | -0.340 | -0.206 |
| IEYRSLARVYGAGTP  | MYCOBACTERIUM BOVIS MYCOCEROSIC ACID SYNTHASE GENE; M95808             | 0.015  | -0.206 |
| IVGASNSTGMSGGFV  | YP_177963; PPE FAMILY PROTEIN                                          | -0.190 | -0.206 |

|                  |                                                                 |        |        |
|------------------|-----------------------------------------------------------------|--------|--------|
| KVRRGACVEQYRQDQ  | MYCOBACTERIUM BOVIS ACYL-COA SYNTHASE GENE; U75685              | -0.048 | -0.207 |
| LGEFLALGAGFEDIG  | PROBABLE ISOCITRATE DEHYDROGENASE CAA16247                      | -0.021 | -0.207 |
| LGSQLRGRDGVVIVY  | MYCOBACTERIUM BOVIS MYCOCEROSIC ACID SYNTHASE GENE; M95808      | -0.060 | -0.207 |
| ERTVLVLRFFDSMTQ  | ALTERNATE RNA POLYMERASE SIGMA FACTOR SIGF CAB07069             | -0.251 | -0.207 |
| GGLPAFTLFPGGLNI  | YP_177963; PPE FAMILY PROTEIN                                   | -0.325 | -0.208 |
| SRIDGTHQTLQGADL  | CAA98350.1; CELL SURFACE LIPOPROTEIN MPT83                      | -0.203 | -0.208 |
| GPQGTecasLSWSVQ  | MYCOBACTERIUM BOVIS MYCOCEROSIC ACID SYNTHASE GENE; M95808      | 0.151  | -0.209 |
| GLFNSGSFNTGIGNS  | YP_177963; PPE FAMILY PROTEIN                                   | -0.082 | -0.210 |
| MTelVTGKAfPYVVV  | 3-OXOACYL-[ACYL-CARRIER PROTEIN] SYNTHASE 2 KASB CAA94642       | -0.135 | -0.210 |
| HEHRPELAMVDSARG  | PROBABLE ISOCITRATE DEHYDROGENASE CAA16247                      | -0.040 | -0.210 |
| NQAKYVSDTRDVLRA  | CAB06237.1; CONSERVED HYPOTHETICAL PROTEIN                      | -0.260 | -0.210 |
| YPTVDYAFQYDGVND  | PPE FAMILY PROTEIN CAE55504                                     | 0.267  | -0.211 |
| YPITGKLGSelTMTD  | CAB06500.1; IMMUNOGENIC PROTEIN MPT63                           | -0.126 | -0.211 |
| LYRPLIFALYCLPLN  | POSSIBLE GLYCOSYL TRANSFERASE CAB05418                          | -0.112 | -0.211 |
| NYEGLAGSFGYPIIP  | YP_177963; PPE FAMILY PROTEIN                                   | -0.172 | -0.211 |
| CWTLVSSRSARASSR  | MYCOBACTERIUM BOVIS MYCOCEROSIC ACID SYNTHASE GENE; M95808      | 0.005  | -0.212 |
| PQCPLLLHAVDQGLQ  | MYCOBACTERIUM BOVIS MYCOCEROSIC ACID SYNTHASE GENE; M95808      | 0.006  | -0.213 |
| RWLTDLCVQLSEVER  | PPE FAMILY PROTEIN CAE55489                                     | 0.038  | -0.213 |
| PEVPLDDGDVIDSMF  | PROBABLE ISOCITRATE DEHYDROGENASE CAA16247                      | -0.047 | -0.214 |
| ILAGASGYVVKDIKG  | TWO COMPONENT TRANSCRIPTIONAL REGULATORY PROTEIN DEVR NP_217649 | 0.160  | -0.214 |
| GNVGDFNLGAANLGD  | YP_177963; PPE FAMILY PROTEIN                                   | -0.026 | -0.215 |
| GYAAATATATATLLP  | CAE55371.1; PPE FAMILY PROTEIN                                  | -0.183 | -0.215 |
| AKLGMERRTQAAVFA  | TWO COMPONENT TRANSCRIPTIONAL REGULATORY PROTEIN DEVR NP_217649 | -0.129 | -0.215 |
| KPQEGTVVAVGPGRW  | CAB01005.1; 10 KDA CHAPERONIN GROES                             | -0.231 | -0.215 |
| PVTTAAMADPAADLI  | CAA98350.1; CELL SURFACE LIPOPROTEIN MPT83                      | 0.021  | -0.216 |
| TKDLAILIGPEQDWL  | CAA17111.1; PROBABLE ISOCITRATE DEHYDROGENASE                   | -0.179 | -0.216 |
| AVVKLSDALIATISS  | PERIPLASMIC PHOSPHATE-BINDING LIPOPROTEIN PSTS1 YP_177770       | -0.065 | -0.216 |
| APIVHEMVSIPEDGG  | CAA17111.1; PROBABLE ISOCITRATE DEHYDROGENASE                   | -0.201 | -0.216 |
| GLPAGSPEFQRHRDK  | ALTERNATE RNA POLYMERASE SIGMA FACTOR SIGF CAB07069             | -0.033 | -0.216 |
| SLHDGERDLALAGGC  | MYCOBACTERIUM BOVIS MYCOCEROSIC ACID SYNTHASE GENE; M95808      | -0.065 | -0.216 |
| APLATYAFPIVRA    | PROBABLE ISOCITRATE DEHYDROGENASE CAA16247                      | -0.341 | -0.217 |
| RREHPYEDIVGLER   | MTB48 AAK31576                                                  | -0.145 | -0.217 |
| EPRVLVRRKAGEVEY  | RNA POLYMERASE BETA-SUBUNIT AAA21416                            | -0.117 | -0.217 |
| ADGRFVEPRVLVRRK  | RNA POLYMERASE BETA-SUBUNIT AAA21416                            | 0.058  | -0.217 |
| AAKPPLGSPPPKTTV  | CAA17582.1; PROBABLE SERINE PROTEASE PEPD                       | -0.183 | -0.217 |
| TIGGQTYTIPLDTPP  | YP_177963; PPE FAMILY PROTEIN                                   | -0.143 | -0.217 |
| FSFFAVGPDGMPGGE  | YP_177963; PPE FAMILY PROTEIN                                   | -0.163 | -0.219 |
| ATDAETTWKLLDRQ   | 3-OXOACYL-[ACYL-CARRIER PROTEIN] SYNTHASE 2 KASB CAA94642       | 0.097  | -0.219 |
| FVNALGDNWIVGASN  | YP_177963; PPE FAMILY PROTEIN                                   | -0.180 | -0.220 |
| LKIDVSGGLPAFTLF  | YP_177963; PPE FAMILY PROTEIN                                   | 0.030  | -0.221 |
| MLKGFAPAAAAQAVQ  | CAE55371.1; PPE FAMILY PROTEIN                                  | -0.062 | -0.221 |
| VSTLNLDGPTTAKIF  | PERIPLASMIC PHOSPHATE-BINDING LIPOPROTEIN PSTS2 YP_177769       | -0.019 | -0.221 |
| WHSLPTRPIIYATL   | POSSIBLE GLYCOSYL TRANSFERASE CAB05418                          | -0.216 | -0.221 |
| DLKTVPANAFVADYL  | POSSIBLE GLYCOSYL TRANSFERASE CAB05415                          | -0.232 | -0.222 |
| PFNVNLKLQFLHDAF  | YP_177963; PPE FAMILY PROTEIN                                   | 0.037  | -0.222 |
| LDLAPKDLEKIIYFA  | RNA POLYMERASE BETA'-SUBUNIT AAA21417                           | -0.159 | -0.222 |
| VRPFALAQSLDPSRY  | POSSIBLE GLYCOSYL TRANSFERASE CAB05415                          | -0.124 | -0.222 |
| ESVGKTIAGAKIMGQ  | PERIPLASMIC PHOSPHATE-BINDING LIPOPROTEIN PSTS2 YP_177769       | -0.087 | -0.222 |
| ERDERDLVSRLLT    | MYCOBACTERIUM BOVIS MYCOCEROSIC ACID SYNTHASE GENE; M95808      | -0.128 | -0.223 |
| RYPPSPPPQPTQYRQ  | CAA17582.1; PROBABLE SERINE PROTEASE PEPD                       | -0.158 | -0.223 |
| LAAYHPQCFIYAGSL  | CAB10044.1; SECRETED ANTIGEN 85-B FBPB (85B)                    | -0.179 | -0.223 |
| TNLLGQNTPAIAVNE  | CAE55371.1; PPE FAMILY PROTEIN                                  | -0.275 | -0.223 |
| LGFTIPGFTIPAAPL  | YP_177963; PPE FAMILY PROTEIN                                   | -0.207 | -0.224 |
| DNQTGFGGGLNSGAGN | YP_177963; PPE FAMILY PROTEIN                                   | 0.381  | -0.224 |
| GILWRGNYEGLAGFS  | YP_177963; PPE FAMILY PROTEIN                                   | -0.102 | -0.224 |
| APTTGVLPPAANDVS  | CAE55335.1; PE FAMILY PROTEIN                                   | -0.007 | -0.224 |
| QPLDWFCLFSSGAAL  | MYCOBACTERIUM BOVIS MYCOCEROSIC ACID SYNTHASE GENE; M95808      | -0.035 | -0.224 |
| FYCVANMPASVPKTS  | SECRETED L-ALANINE DEHYDROGENASE ALD CAA15575                   | -0.125 | -0.224 |
| RAAHADPCS DIAVVF | PROBABLE CUTINASE PRECURSOR CFP21 NP_216500                     | -0.138 | -0.225 |
| VDGSSASELATAIAF  | HYPOTHETICAL PROTEIN RV2623 NP_217139                           | -0.181 | -0.225 |
| GMLSSTGRCHSFADAD | MYCOBACTERIUM BOVIS MYCOCEROSIC ACID SYNTHASE GENE; M95808      | -0.259 | -0.225 |
| GDRGPVWVFSGGQGSQ | MYCOBACTERIUM BOVIS MYCOCEROSIC ACID SYNTHASE GENE; M95808      | 0.059  | -0.225 |
| DGPTTAKIFNGTITV  | PERIPLASMIC PHOSPHATE-BINDING LIPOPROTEIN PSTS2 YP_177769       | -0.213 | -0.226 |
| GLTFPANSLNLDFV   | YP_177963; PPE FAMILY PROTEIN                                   | -0.105 | -0.226 |

|                   |                                                                        |        |        |
|-------------------|------------------------------------------------------------------------|--------|--------|
| VTADAASIMAIVADI   | CONSERVED HYPOTHETICAL PROTEIN TB18.5CAD93033                          | -0.117 | -0.226 |
| YGLNAKWVYVSTKN    | CAA17111.1; PROBABLE ISOCITRATE DEHYDROGENASE                          | 0.183  | -0.226 |
| EEQSEFDVILEAAGD   | CAB07109.1; PROBABLE 50S RIBOSOMAL PROTEIN L7/L12 RPLL                 | -0.079 | -0.226 |
| IGPTWYVSGRIYNAG   | YP_177963; PPE FAMILY PROTEIN                                          | -0.086 | -0.226 |
| ITLFPGGTLFPANSL   | YP_177963; PPE FAMILY PROTEIN                                          | -0.420 | -0.227 |
| GNSGTGSTGLFNAGS   | YP_177963; PPE FAMILY PROTEIN                                          | 0.116  | -0.228 |
| EIELEDPYEKIGAEI   | 60 kDa chaperonin 2 P0A521                                             | -0.107 | -0.228 |
| GTFPSKLGGLWKTIV   | CAE55371.1; PPE FAMILY PROTEIN                                         | -0.151 | -0.228 |
| SDFHAFSAAPNFAFE   | MYCOBACTERIUM BOVIS ACYL-COA SYNTHASE GENE; U75685                     | -0.100 | -0.230 |
| QAQIDKWHRRRVIEP   | MTB81 (publication)                                                    | -0.068 | -0.230 |
| VAGQTSPANVVGTRQ   | CAA98373.1; MAJOR SECRETED IMMUNOGENIC PROTEIN                         | -0.078 | -0.230 |
| SGYFVTDPERQEAIV   | 60 kDa chaperonin 2 P0A521                                             | -0.170 | -0.230 |
| PPSGSPETGAGAGTV   | PERIPLASMIC PHOSPHATE-BINDING LIPOPROTEIN PSTS1 YP_177770              | -0.198 | -0.230 |
| KDAVLMVVGCLGSGR   | HYPOTHETICAL PROTEIN RV2623 NP_217139                                  | -0.130 | -0.231 |
| TAAPLLAAAGCGSK    | PERIPLASMIC PHOSPHATE-BINDING LIPOPROTEIN PSTS1 YP_177770              | -0.132 | -0.231 |
| LPQWLSANRAVVKPTG  | CAB10044.1; SECRETED ANTIGEN 85-B FBPB (85B)                           | -0.018 | -0.232 |
| AVCAPTTGVLPPAAN   | CAE55335.1; PE FAMILY PROTEIN                                          | -0.070 | -0.232 |
| DRLHGLMTRDIVIK    | HYPOTHETICAL PROTEIN RV2626C NP_217142                                 | -0.146 | -0.232 |
| YATASRWGGPPVASE   | POSSIBLE GLYCOSYL TRANSFERASE CAB05415                                 | -0.230 | -0.233 |
| GPGQIEVAVSMSSIN   | MYCOBACTERIUM BOVIS MYCOCEROSIC ACID SYNTHASE GENE; M95808             | -0.134 | -0.233 |
| VTLAHVVRPFLAASQ   | POSSIBLE GLYCOSYL TRANSFERASE CAB05415                                 | -0.227 | -0.234 |
| LWGPAFHERYPNVTI   | PERIPLASMIC PHOSPHATE-BINDING LIPOPROTEIN PSTS1 YP_177770              | -0.192 | -0.234 |
| RSVCPMVVAPGGTFF   | CAB10947.1; PROBABLE LIPOPROTEIN LPRJ                                  | -0.405 | -0.234 |
| RDGLAHLGFDEVFAR   | PUTATIVE CYCLOPROPANE-FATTY-ACYL-PHOSPHOLIPID SYNTHASE UFAA1 NP_854118 | -0.039 | -0.235 |
| NIGFANTGSNNIGIG   | YP_177963; PPE FAMILY PROTEIN                                          | 0.137  | -0.235 |
| DKVLGYRNWGLNKG    | MTB81 (publication)                                                    | -0.151 | -0.236 |
| AGRLTEPHIVPIHDY   | TRANSMEMBRANE SERINE/THREONINE-PROTEIN KINASE D PKND NP_215446         | -0.073 | -0.236 |
| PAATIDQLKTDAKLL   | CAA98350.1; CELL SURFACE LIPOPROTEIN MPT83                             | 0.015  | -0.236 |
| MADPAADLIGRGCAQ   | CAA98350.1; CELL SURFACE LIPOPROTEIN MPT83                             | -0.100 | -0.236 |
| SCAAPIQADMMGNAF   | CAB10947.1; PROBABLE LIPOPROTEIN LPRJ                                  | 0.021  | -0.236 |
| SSNYGLANLGVGNIG   | YP_177963; PPE FAMILY PROTEIN                                          | 0.236  | -0.237 |
| SGVEGLPPGSALLVV   | CAB01474.1; CONSERVED HYPOTHETICAL PROTEIN CFP17                       | -0.477 | -0.237 |
| QNLGAANAGSGNFGF   | YP_177963; PPE FAMILY PROTEIN                                          | 0.177  | -0.237 |
| SLIGLAMGDAGGYKA   | CAB10044.1; SECRETED ANTIGEN 85-B FBPB (85B)                           | 0.020  | -0.238 |
| HQNVVRVNFQQLMSGY  | MYCOBACTERIUM BOVIS ACYL-COA SYNTHASE GENE; U75685                     | -0.176 | -0.238 |
| AGLTTLAYTAATITM   | POSSIBLE HEMOLYSIN-LIKE PROTEIN CAA17201                               | 0.022  | -0.238 |
| NVGLFNSGTGNFGLF   | YP_177963; PPE FAMILY PROTEIN                                          | 0.052  | -0.239 |
| AAIKELQDKGYAVPD   | PROBABLE ISOCITRATE DEHYDROGENASE CAA16247                             | -0.111 | -0.240 |
| PLGLKRGIEKAVEKV   | 60 kDa chaperonin 2 P0A521                                             | -0.096 | -0.240 |
| FGDVEDAHGAMIRAQA  | PUTATIVE ESAT-6 LIKE PROTEIN ESXN YP_177838                            | -0.008 | -0.241 |
| TGLFVPQAVTPWPNG   | MYCOBACTERIUM BOVIS MYCOCEROSIC ACID SYNTHASE GENE; M95808             | -0.013 | -0.241 |
| PLPGVLRWQQDHGR    | HYPOTHETICAL PROTEIN RV2623 NP_217139                                  | -0.121 | -0.241 |
| TPFGNNTTAPSSGF    | YP_177963; PPE FAMILY PROTEIN                                          | -0.185 | -0.242 |
| EAVIGNRRRRQDSKES  | MTB48 AAK31576                                                         | 0.621  | -0.242 |
| MSSGNSSLGIIVGID   | HYPOTHETICAL PROTEIN RV2623 NP_217139                                  | 0.082  | -0.242 |
| LDPGQPVSRVLIRGE   | CAA17343.1; HEAT SHOCK PROTEIN HSP                                     | -0.349 | -0.242 |
| DKLTGNMISNQAKYV   | CAB06237.1; CONSERVED HYPOTHETICAL PROTEIN                             | -0.033 | -0.243 |
| KIFNGSITQWNNPAI   | PERIPLASMIC PHOSPHATE-BINDING LIPOPROTEIN PSTS3 YP_177768              | -0.074 | -0.244 |
| ITPDEARVEEFNLKK   | CAA17111.1; PROBABLE ISOCITRATE DEHYDROGENASE                          | -0.134 | -0.245 |
| HRCHEHRPELAMVDS   | PROBABLE ISOCITRATE DEHYDROGENASE CAA16247                             | -0.029 | -0.246 |
| PMSTRLGIRLVIVLV   | POSSIBLE GLYCOSYL TRANSFERASE CAB05419                                 | -0.153 | -0.246 |
| PIVIGRHAFGDQYRA   | CAA17111.1; PROBABLE ISOCITRATE DEHYDROGENASE                          | -0.107 | -0.246 |
| IDAAIAELRHLNPLN   | YP_177963; PPE FAMILY PROTEIN                                          | -0.360 | -0.247 |
| NVGDFNLGAANIGDL   | YP_177963; PPE FAMILY PROTEIN                                          | -0.170 | -0.247 |
| QAGLEKLGSQRLGRD   | MYCOBACTERIUM BOVIS MYCOCEROSIC ACID SYNTHASE GENE; M95808             | -0.117 | -0.247 |
| VATSKPGQPPETVDF   | MYCOBACTERIUM BOVIS ACYL-COA SYNTHASE GENE; U75685                     | -0.229 | -0.247 |
| LAPKSGSGTEVTYELA  | CONSERVED HYPOTHETICAL PROTEIN TB16.3CAD97060                          | -0.014 | -0.248 |
| GGLNSGAGNLGLFNS   | YP_177963; PPE FAMILY PROTEIN                                          | -0.198 | -0.248 |
| HTSMEAGPMVRKGTMT  | MTB81 (publication)                                                    | -0.114 | -0.249 |
| VGPGRWDEDEGEKRIPI | CAB01005.1; 10 KDA CHAPERONIN GROES                                    | -0.044 | -0.249 |
| PAVPGALGENGNMG    | PERIPLASMIC PHOSPHATE-BINDING LIPOPROTEIN PSTS1 YP_177770              | -0.165 | -0.250 |
| AANLGDNLGLGNIG    | YP_177963; PPE FAMILY PROTEIN                                          | -0.042 | -0.250 |
| GDNVGNNGYWKPDDES  | MYCOBACTERIUM BOVIS ACYL-COA SYNTHASE GENE; U75685                     | -0.103 | -0.250 |
| ARWGSLYDALYGTDV   | MTB81 (publication)                                                    | -0.109 | -0.250 |

|                  |                                                                              |        |        |
|------------------|------------------------------------------------------------------------------|--------|--------|
| DFAGFPQHIESALRL  | POSSIBLE GLYCOSYL TRANSFERASE CAB05418                                       | -0.066 | -0.250 |
| GFVTAPTQGIHITG   | YP_177963; PPE FAMILY PROTEIN                                                | -0.308 | -0.252 |
| PIIIVPPTPGFGNAT  | YP_177963; PPE FAMILY PROTEIN                                                | -0.261 | -0.252 |
| IDSLEEAVRDSRPAV  | CONSERVED HYPOTHETICAL PROTEIN CAB08634                                      | -0.189 | -0.253 |
| LLKQYGPLTPARA    | TRANSMEMBRANE SERINE/THREONINE-PROTEIN KINASE D PKND NP_215446               | -0.304 | -0.253 |
| ASVILRRITADRSF   | MYCOBACTERIUM BOVIS MYCOCEROSIC ACID SYNTHASE GENE; M95808                   | -0.090 | -0.254 |
| PTTMGTVPNVGLMAQ  | PROBABLE ISOCITRATE DEHYDROGENASE CAA16247                                   | -0.110 | -0.255 |
| WLLIDTSNAVDTPDM  | MYCOBACTERIUM BOVIS MYCOCEROSIC ACID SYNTHASE GENE; M95808                   | -0.301 | -0.255 |
| DTAAANQLMNNVPQA  | CAE55371.1; PPE FAMILY PROTEIN                                               | -0.191 | -0.256 |
| MVSIPEDGGVVLGMY  | CAA17111.1; PROBABLE ISOCITRATE DEHYDROGENASE                                | -0.218 | -0.256 |
| FGNSGLGALPGIGNI  | YP_177963; PPE FAMILY PROTEIN                                                | 0.279  | -0.256 |
| VGEAFVDSLTSQVGG  | PROBABLE CUTINASE PRECURSOR CFP21 NP_216500                                  | -0.183 | -0.257 |
| AGNIGLFNSGTGNVG  | YP_177963; PPE FAMILY PROTEIN                                                | -0.066 | -0.257 |
| DGRSEFAYGFSVRTV  | CAA17245.1; HEAT SHOCK PROTEIN HSPX                                          | -0.094 | -0.259 |
| YSMITQQPLGGKAQF  | RNA POLYMERASE BETA-SUBUNIT AAA21416                                         | -0.113 | -0.260 |
| DVERVAQQLLSGSEE  | MYCOBACTERIUM BOVIS MYCOCEROSIC ACID SYNTHASE GENE; M95808                   | -0.092 | -0.260 |
| ADHGWRACRSNPAL   | SECRETED L-ALANINE DEHYDROGENASE ALD CAA15575                                | 0.108  | -0.261 |
| ALNAANARWGSGLYDA | MTB81 (publication)                                                          | -0.057 | -0.261 |
| FPVGPFFGLGVVNIS  | YP_177963; PPE FAMILY PROTEIN                                                | 0.251  | -0.261 |
| LVIPDTAKEKPQEGT  | CAB01005.1; 10 KDA CHAPERONIN GROES                                          | -0.174 | -0.261 |
| QLFSVVATGAASLLT  | CONSERVED HYPOTHETICAL PROTEIN TB18.5CAD93033                                | -0.122 | -0.261 |
| YKVTGTAPIYEILHD  | CAB08889.1; IRON-REGULATED CONSERVED HYPOTHETICAL PROTEIN                    | -0.327 | -0.262 |
| GLGGLGLFFASKLAA  | MYCOBACTERIUM BOVIS MYCOCEROSIC ACID SYNTHASE GENE; M95808                   | -0.073 | -0.262 |
| TILRRGDNATLLATP  | TRANSMEMBRANE SERINE/THREONINE-PROTEIN KINASE D PKND NP_215446               | -0.201 | -0.262 |
| AGVLTVRVAGAYKAP  | CAA17343.1; HEAT SHOCK PROTEIN HSP                                           | 0.033  | -0.262 |
| GASDAYLSEGDMAAH  | PERIPLASMIC PHOSPHATE-BINDING LIPOPROTEIN PSTS1 YP_177770                    | 0.066  | -0.263 |
| FGFGGHNVAIAFGRY  | 3-OXOACYL-[ACYL-CARRIER PROTEIN] SYNTHASE 2 KASB CAA94642                    | -0.105 | -0.263 |
| IIKLPNISASVPQLV  | PROBABLE ISOCITRATE DEHYDROGENASE CAA16247                                   | -0.568 | -0.263 |
| GGAGSVACQEFITQL  | PUTATIVE ESAT-6 LIKE PROTEIN ESXN YP_177838                                  | -0.078 | -0.263 |
| AYNAAGGHNAVFNFP  | CAB10044.1; SECRETED ANTIGEN 85-B FBPB (85B)                                 | -0.092 | -0.263 |
| RLFMLSSTSSDALRQ  | MYCOBACTERIUM BOVIS MYCOCEROSIC ACID SYNTHASE GENE; M95808                   | 0.146  | -0.264 |
| ADYLPGEAAAARS    | POSSIBLE GLYCOSYL TRANSFERASE CAB05418                                       | -0.176 | -0.264 |
| IHWSTGGIGPIIP    | YP_177963; PPE FAMILY PROTEIN                                                | 0.022  | -0.264 |
| DRFADFPALPLDPSA  | CAB09453.1; PROBABLE SERINE PROTEASE PEPA                                    | -0.258 | -0.264 |
| PAVSQFNARTADGIN  | CAB06500.1; IMMUNOGENIC PROTEIN MPT63                                        | -0.215 | -0.264 |
| CIKAAADRNVFINTG  | MTB81 (publication)                                                          | -0.008 | -0.264 |
| IGLFNSGTGNVGLFN  | YP_177963; PPE FAMILY PROTEIN                                                | -0.192 | -0.264 |
| AQYLADTLAEEQAAA  | MYCOBACTERIUM BOVIS MYCOCEROSIC ACID SYNTHASE GENE; M95808                   | -0.162 | -0.264 |
| VQFQSGGNNSPAVYL  | CAB10044.1; SECRETED ANTIGEN 85-B FBPB (85B)                                 | -0.112 | -0.265 |
| LIATNLLGQNTPAIA  | CAE55371.1; PPE FAMILY PROTEIN                                               | -0.752 | -0.266 |
| GHRVEIDLCDYRDVD  | PUTATIVE CYCLOPROPANE-FATTY-ACYL-PHOSPHOLIPID SYNTHASE UFAA1 NP_854118       | -0.193 | -0.266 |
| TPADGSAPIVHEMVS  | CAA17111.1; PROBABLE ISOCITRATE DEHYDROGENASE                                | 0.323  | -0.266 |
| AARSVLCNGGSPT    | POSSIBLE GLYCOSYL TRANSFERASE CAB05418                                       | -0.172 | -0.266 |
| ADAYPTVDYAFQYDG  | PPE FAMILY PROTEIN CAE55504                                                  | -0.093 | -0.266 |
| PDYLTEEQRVPDNLA  | PROBABLE ISOCITRATE DEHYDROGENASE CAA16247                                   | -0.137 | -0.266 |
| MPDLRCLILTSYSD   | TWO COMPONENT TRANSCRIPTIONAL REGULATORY PROTEIN DEVR NP_217649              | -0.199 | -0.267 |
| DESERTFGGKIVTPS  | MYCOBACTERIUM BOVIS ACYL-COA SYNTHASE GENE; U75685                           | -0.052 | -0.267 |
| ATIEYLVRLEHGQTT  | RNA POLYMERASE BETA-SUBUNIT AAA21416                                         | -0.198 | -0.267 |
| ASDFAYLVDFGIARA  | TRANSMEMBRANE SERINE/THREONINE-PROTEIN KINASE D PKND NP_215446               | -0.082 | -0.267 |
| GAVGAVESILTVLAL  | 3-OXOACYL-[ACYL-CARRIER PROTEIN] SYNTHASE 2 KASB CAA94642                    | -0.124 | -0.267 |
| PFLEHDDANRALMGA  | RNA POLYMERASE BETA-SUBUNIT AAA21416                                         | -0.167 | -0.267 |
| AVPTLVDMSKDAVLM  | HYPOTHETICAL PROTEIN RV2623 NP_217139                                        | -0.196 | -0.267 |
| PLPTLPVPVLRDEL   | CAA16030.1; PROBABLE MOLYBDOPTERIN-GUANINE DINUCLEOTIDE BIOSYNTHESIS PROTEIN | -0.217 | -0.268 |
| FGNIGGGNVGFGNIG  | YP_177963; PPE FAMILY PROTEIN                                                | 0.276  | -0.268 |
| GPLVVPDIVAFGG    | YP_177963; PPE FAMILY PROTEIN                                                | -0.220 | -0.269 |
| MLETDLGRQSEEGSG  | CAA17582.1; PROBABLE SERINE PROTEASE PEPD                                    | -0.164 | -0.269 |
| NIGFANTGTNNLGIG  | YP_177963; PPE FAMILY PROTEIN                                                | 0.003  | -0.269 |
| AGAGTVATTPASSPV  | PERIPLASMIC PHOSPHATE-BINDING LIPOPROTEIN PSTS1 YP_177770                    | -0.115 | -0.270 |
| TIDKSTDKTLHSVVKV | RNA POLYMERASE BETA-SUBUNIT AAA21416                                         | -0.239 | -0.270 |
| FLDRTGDEIHTSMEA  | MTB81 (publication)                                                          | -0.210 | -0.270 |
| LKSLEGTYRLAPKGS  | CONSERVED HYPOTHETICAL PROTEIN TB16.3CAD97060                                | -0.127 | -0.270 |

|                  |                                                                        |        |        |
|------------------|------------------------------------------------------------------------|--------|--------|
| FAWTRGLQHRGKLDG  | CAA17111.1; PROBABLE ISOCITRATE DEHYDROGENASE                          | -0.158 | -0.270 |
| SNAVDTPDMLASTLT  | MYCOBACTERIUM BOVIS MYCOCEROSIC ACID SYNTHASE GENE; M95808             | -0.464 | -0.270 |
| SGIAMAVVGGALLYL  | CAB06237.1; CONSERVED HYPOTHETICAL PROTEIN                             | -0.130 | -0.270 |
| PPPPQEQGLIPGFL   | MTB48 AAK31576                                                         | -0.171 | -0.271 |
| MGPAAAAAMAAATPY  | PPE FAMILY PROTEIN CAE55334                                            | -0.100 | -0.271 |
| HIGLYGNAGGLGPTQ  | PPE FAMILY PROTEIN CAE55334                                            | -0.124 | -0.271 |
| NIGDVNLGFGNIGDV  | YP_177963; PPE FAMILY PROTEIN                                          | 0.094  | -0.271 |
| EASDISVAARILAEF  | PROBABLE ISOCITRATE DEHYDROGENASE CAA16247                             | -0.181 | -0.272 |
| ISPITLFPQNFNTT   | YP_177963; PPE FAMILY PROTEIN                                          | 0.022  | -0.272 |
| VFLVDDHEVVRRGLV  | TWO COMPONENT TRANSCRIPTIONAL REGULATORY PROTEIN DEVR NP_217649        | -0.219 | -0.273 |
| FGPDFAGFPQHIESA  | POSSIBLE GLYCOSYL TRANSFERASE CAB05418                                 | -0.189 | -0.273 |
| VASADPVDVAVINTTC | LOW MOLECULAR WEIGHT T-CELL ANTIGEN TB8.4 NP_215690                    | -0.258 | -0.273 |
| LMTADGKTVEAEAAH  | CAA17111.1; PROBABLE ISOCITRATE DEHYDROGENASE                          | -0.129 | -0.274 |
| PDEHSLLAGREQVRH  | MYCOBACTERIUM BOVIS MYCOCEROSIC ACID SYNTHASE GENE; M95808             | -0.093 | -0.274 |
| GDTNTGGFNPQSINT  | YP_177963; PPE FAMILY PROTEIN                                          | -0.090 | -0.275 |
| AESGFSVTEAITAQQ  | MYCOBACTERIUM BOVIS MYCOCEROSIC ACID SYNTHASE GENE; M95808             | -0.170 | -0.275 |
| MYCPSVMADVASGNL  | CONSERVED HYPOTHETICAL PROTEIN CAA15739                                | -0.089 | -0.275 |
| VGFGNMGVGNIGFGN  | YP_177963; PPE FAMILY PROTEIN                                          | 0.275  | -0.275 |
| TEYNNKAALEPVNPP  | MTB48 AAK31576                                                         | 0.062  | -0.277 |
| ESIRDFARASFSYGL  | CAA17111.1; PROBABLE ISOCITRATE DEHYDROGENASE                          | -0.147 | -0.277 |
| KTAGLGLVLVLFALVV | MCE-FAMILY PROTEIN MCE1AYP_177701                                      | -0.112 | -0.277 |
| GVNIPATPGFGNTTT  | YP_177963; PPE FAMILY PROTEIN                                          | -0.249 | -0.277 |
| STGLFNAGSFNTGLA  | YP_177963; PPE FAMILY PROTEIN                                          | -0.078 | -0.278 |
| LESSLLKSLEGTYR   | CONSERVED HYPOTHETICAL PROTEIN TB16.3CAD97060                          | -0.336 | -0.278 |
| NEGVITVEESNTFGL  | 60 kDa chaperonin 2 P0A521                                             | -0.198 | -0.278 |
| SSGFFNSGAGGVSGF  | YP_177963; PPE FAMILY PROTEIN                                          | -0.148 | -0.278 |
| PAGAAVEAAEEQSEF  | CAB07109.1; PROBABLE 50S RIBOSOMAL PROTEIN L7/L12 RPLL                 | -0.066 | -0.279 |
| GAGVASADPVDVIN   | LOW MOLECULAR WEIGHT T-CELL ANTIGEN TB8.4 NP_215690                    | -0.018 | -0.279 |
| VGADPTSDIAVVRVQ  | CAA17582.1; PROBABLE SERINE PROTEASE PEPD                              | -0.241 | -0.280 |
| AGNIGLFNSGTGNIG  | YP_177963; PPE FAMILY PROTEIN                                          | 0.153  | -0.280 |
| DVETGLFVPQAVTPW  | MYCOBACTERIUM BOVIS MYCOCEROSIC ACID SYNTHASE GENE; M95808             | -0.221 | -0.280 |
| HIPQLVASQSFAAAK  | CONSERVED HYPOTHETICAL PROTEIN TB9.8 CAD93159                          | -0.069 | -0.280 |
| NELIKKVKTYLKDHD  | PROBABLE ISOCITRATE DEHYDROGENASE CAA16247                             | -0.307 | -0.281 |
| GTGSTGLFNAGSFNT  | YP_177963; PPE FAMILY PROTEIN                                          | 0.048  | -0.281 |
| HTNTGGFNTGNVNTG  | YP_177963; PPE FAMILY PROTEIN                                          | 0.140  | -0.282 |
| VAITLTWSQLYRRTL  | MYCOBACTERIUM BOVIS ACYL-COA SYNTHASE GENE; U75685                     | -0.126 | -0.283 |
| HHPGDVISVTWQTKS  | CAB09453.1; PROBABLE SERINE PROTEASE PEPA                              | -0.078 | -0.283 |
| PELDVVGEAGSVAEA  | TWO COMPONENT TRANSCRIPTIONAL REGULATORY PROTEIN DEVR NP_217649        | 0.014  | -0.283 |
| GRNFQVIYEQANAHG  | PUTATIVE ESAT-6 LIKE PROTEIN ESXN YP_177838                            | -0.050 | -0.283 |
| LTFTPADGSAPIVHE  | CAA17111.1; PROBABLE ISOCITRATE DEHYDROGENASE                          | 0.144  | -0.284 |
| LIETEEHAKARGANI  | 3-OXOACYL-[ACYL-CARRIER PROTEIN] SYNTHASE 2 KASB CAA94642              | 0.117  | -0.284 |
| AGLFLTTEAVVADKP  | 60 kDa chaperonin 2 P0A521                                             | 0.127  | -0.284 |
| DGGILTRFGFSIPQL  | PPE FAMILY PROTEIN CAE55504                                            | 0.067  | -0.284 |
| IVKDAPIRDWVKLAV  | PROBABLE ISOCITRATE DEHYDROGENASE CAA16247                             | -0.165 | -0.284 |
| QATTILRRGDNATLL  | TRANSMEMBRANE SERINE/THREONINE-PROTEIN KINASE D PKND NP_215446         | -0.048 | -0.284 |
| TVEVTADAASIMAIV  | CONSERVED HYPOTHETICAL PROTEIN TB18.5CAD93033                          | -0.166 | -0.285 |
| GEWSSKELTRVLTVL  | PUTATIVE CYCLOPROPANE-FATTY-ACYL-PHOSPHOLIPID SYNTHASE UFAA1 NP_854118 | -0.247 | -0.285 |
| LTGDNLTGIGGLNSG  | YP_177963; PPE FAMILY PROTEIN                                          | -0.370 | -0.285 |
| SGPVVELDGDDEMTRV | CAA17111.1; PROBABLE ISOCITRATE DEHYDROGENASE                          | -0.185 | -0.285 |
| RVAGAYKAPAEVQAQ  | CAA17343.1; HEAT SHOCK PROTEIN HSP                                     | -0.037 | -0.286 |
| FADRFARFNLQERVI  | MYCOBACTERIUM BOVIS ACYL-COA SYNTHASE GENE; U75685                     | -0.125 | -0.286 |
| FVEEFDLPVRIGGHL  | 3-OXOACYL-[ACYL-CARRIER PROTEIN] SYNTHASE 2 KASB CAA94642              | 0.056  | -0.287 |
| LPVGVDLGLKLPWTQE | CAB06237.1; CONSERVED HYPOTHETICAL PROTEIN                             | -0.256 | -0.287 |
| EHLAENLKQRAEQLA  | CONSERVED HYPOTHETICAL PROTEIN TB18.5CAD93033                          | -0.088 | -0.287 |
| DPRFDDVKAPVDECK  | RNA POLYMERASE BETA-SUBUNIT AAA21416                                   | -0.223 | -0.288 |
| NRPDGGILTRFGFSI  | PPE FAMILY PROTEIN CAE55504                                            | 0.081  | -0.288 |
| AQSLDPSRYEVHFAC  | POSSIBLE GLYCOSYL TRANSFERASE CAB05415                                 | -0.109 | -0.288 |
| AHGQKVQAAGNNMAQ  | PUTATIVE ESAT-6 LIKE PROTEIN ESXN YP_177838                            | 0.221  | -0.288 |
| DGYPIINYEYAIVNN  | PERIPLASMIC PHOSPHATE-BINDING LIPOPROTEIN PSTS1 YP_177770              | -0.103 | -0.288 |
| VGGGNVGFNGIGDAN  | YP_177963; PPE FAMILY PROTEIN                                          | 0.196  | -0.288 |
| LQHRGKLDGTPEVID  | CAA17111.1; PROBABLE ISOCITRATE DEHYDROGENASE                          | -0.203 | -0.288 |
| GAAQRAGLELLPFGG  | MYCOBACTERIUM BOVIS MYCOCEROSIC ACID SYNTHASE GENE; M95808             | -0.134 | -0.289 |

|                  |                                                                              |        |        |
|------------------|------------------------------------------------------------------------------|--------|--------|
| PVTAGWNGYGDFQHT  | CONSERVED HYPOTHETICAL PROTEIN CAB08634                                      | -0.078 | -0.289 |
| TGIGNSGTGSTGLFN  | YP_177963; PPE FAMILY PROTEIN                                                | 0.054  | -0.289 |
| KHRIEDAVRNAKAAV  | 60 kDa chaperonin 2 P0A521                                                   | -0.140 | -0.290 |
| PKSFQAKLAAVNAI   | PERIPLASMIC PHOSPHATE-BINDING LIPOPROTEIN PSTS2 YP_177769                    | 0.033  | -0.290 |
| IGIRVFSREDEDELP  | RNA POLYMERASE BETA-SUBUNIT AAA21416                                         | -0.125 | -0.291 |
| PPQQPGTPGYAQGGQ  | CAA17582.1; PROBABLE SERINE PROTEASE PEPD                                    | -0.135 | -0.291 |
| TTGLAGDAWHGPASL  | PPE FAMILY PROTEIN CAE55504                                                  | 0.016  | -0.291 |
| NLLQVVLNALADLPV  | POSSIBLE GLYCOSYL TRANSFERASE CAB05418                                       | -0.540 | -0.292 |
| HFRDNSWSVKVPRRL  | ALTERNATE RNA POLYMERASE SIGMA FACTOR SIGF CAB07069                          | -0.140 | -0.292 |
| DSPAAQVAVRWAAARD | HYPOTHETICAL PROTEIN RV2623 NP_217139                                        | -0.176 | -0.292 |
| GNLNIDTRINQSFV   | YP_177963; PPE FAMILY PROTEIN                                                | 0.236  | -0.292 |
| NTGNTNTGIANSGNV  | YP_177963; PPE FAMILY PROTEIN                                                | -0.065 | -0.292 |
| TTGRSCQTDVDGAND  | POSSIBLE HEMOLYSIN CAA16235                                                  | 0.164  | -0.293 |
| LLGWVAVWYTATILH  | POSSIBLE HEMOLYSIN-LIKE PROTEIN CAA17201                                     | -0.206 | -0.293 |
| KATLPLPGGTTTLVE  | CAA16030.1; PROBABLE MOLYBDOPTERIN-GUANINE DINUCLEOTIDE BIOSYNTHESIS PROTEIN | -0.031 | -0.293 |
| ASGLGDVGEAFVDSL  | PROBABLE CUTINASE PRECURSOR CFP21 NP_216500                                  | -0.234 | -0.293 |
| GLSGGSTIPAIGL    | YP_177963; PPE FAMILY PROTEIN                                                | -0.363 | -0.294 |
| NSGSFNTGIGNGGTG  | YP_177963; PPE FAMILY PROTEIN                                                | -0.135 | -0.295 |
| GLDPVNYQNFAVTND  | CAA98382.1; IMMUNOGENIC PROTEIN MPT64                                        | 0.008  | -0.295 |
| AKERHNAAGAKNVEE  | CAB08889.1; IRON-REGULATED CONSERVED HYPOTHETICAL PROTEIN                    | 0.044  | -0.295 |
| VPNVGLMAQQAEYEG  | PROBABLE ISOCITRATE DEHYDROGENASE CAA16247                                   | 0.209  | -0.295 |
| VPPLLHFNRLPDELS  | MYCOBACTERIUM BOVIS MYCOCEROSIC ACID SYNTHASE GENE; M95808                   | 0.065  | -0.295 |
| VLGASLVAVSWAVG   | POSSIBLE HEMOLYSIN-LIKE PROTEIN CAA17201                                     | 0.036  | -0.296 |
| TLGTSGGRNLLQLVL  | POSSIBLE GLYCOSYL TRANSFERASE CAB05415                                       | -0.070 | -0.298 |
| AGIPYIAIANAYWSP  | POSSIBLE GLYCOSYL TRANSFERASE CAB05418                                       | -0.103 | -0.298 |
| GIGLTGDNLTGIGGL  | YP_177963; PPE FAMILY PROTEIN                                                | -0.175 | -0.298 |
| LVQEEQSDMTNHPR   | CAA17582.1; PROBABLE SERINE PROTEASE PEPD                                    | -0.160 | -0.301 |
| DGVGALLRYAATNRL  | CONSERVED HYPOTHETICAL PROTEIN CAB08634                                      | -0.207 | -0.301 |
| AEAFGPDFAGFPQHI  | POSSIBLE GLYCOSYL TRANSFERASE CAB05418                                       | -0.060 | -0.301 |
| TGVGNAGTASTGLFN  | YP_177963; PPE FAMILY PROTEIN                                                | -0.050 | -0.301 |
| ILELGTSAKMLSVVP  | PROBABLE ISOCITRATE DEHYDROGENASE CAA16247                                   | -0.352 | -0.302 |
| GLGNLGDGNVGFNL   | YP_177963; PPE FAMILY PROTEIN                                                | 0.093  | -0.302 |
| GFGNVGDFNLGAANI  | YP_177963; PPE FAMILY PROTEIN                                                | -0.130 | -0.302 |
| RDKIVQRCLPLADHI  | ALTERNATE RNA POLYMERASE SIGMA FACTOR SIGF CAB07069                          | -0.187 | -0.303 |
| GLADVGNYNLGLGNV  | YP_177963; PPE FAMILY PROTEIN                                                | 0.132  | -0.303 |
| NFIWQQLLLLGEGIP  | CAB06237.1; CONSERVED HYPOTHETICAL PROTEIN                                   | -0.275 | -0.303 |
| VVAMAAIATFAAPVA  | CAB06500.1; IMMUNOGENIC PROTEIN MPT63                                        | -0.061 | -0.303 |
| GNIGNANFGFGNSGL  | YP_177963; PPE FAMILY PROTEIN                                                | 0.458  | -0.304 |
| SPAWNLPVVFGPVAV  | PERIPLASMIC PHOSPHATE-BINDING LIPOPROTEIN PSTS3 YP_177768                    | 0.086  | -0.304 |
| NSGSYNTGVGNAGTA  | YP_177963; PPE FAMILY PROTEIN                                                | -0.174 | -0.305 |
| EIVCSKYPDATTGTA  | PERIPLASMIC PHOSPHATE-BINDING LIPOPROTEIN PSTS2 YP_177769                    | -0.051 | -0.305 |
| LNKARVPPYKTAGLG  | MCE-FAMILY PROTEIN MCE1AYP_177701                                            | 0.018  | -0.306 |
| LGLGNVDFNLGAAN   | YP_177963; PPE FAMILY PROTEIN                                                | 0.060  | -0.306 |
| PFLADGTPVDIILNT  | RNA POLYMERASE BETA-SUBUNIT AAA21416                                         | -0.130 | -0.306 |
| LNLGLGNIGNANVGF  | YP_177963; PPE FAMILY PROTEIN                                                | 0.071  | -0.307 |
| IGTLGFTIPGFTIPA  | YP_177963; PPE FAMILY PROTEIN                                                | -0.411 | -0.307 |
| LVVGNGGPGVTALVM  | PPE FAMILY PROTEIN CAE55504                                                  | -0.150 | -0.308 |
| FRGRWLDPRHAGPAT  | CAA16102.1; ESAT-6 LIKE PROTEIN ESXQ                                         | -0.138 | -0.308 |
| DEDEKRIPLDVAEG   | CAB01005.1; 10 KDA CHAPERONIN GROES                                          | -0.010 | -0.308 |
| QVNSELMARGIDDVV  | MYCOBACTERIUM BOVIS MYCOCEROSIC ACID SYNTHASE GENE; M95808                   | -0.087 | -0.308 |
| GQPVLAIGSPLGLEG  | CAA17582.1; PROBABLE SERINE PROTEASE PEPD                                    | -0.200 | -0.308 |
| FGNSGLGAALGIGNI  | YP_177963; PPE FAMILY PROTEIN                                                | 0.140  | -0.309 |
| TPDAAPGLAARRRRI  | POSSIBLE GLYCOSYL TRANSFERASE CAB05415                                       | 0.023  | -0.309 |
| AHFTGAFGPVVVPPI  | YP_177963; PPE FAMILY PROTEIN                                                | -0.148 | -0.309 |
| TGFGGLNSGAGNLGL  | YP_177963; PPE FAMILY PROTEIN                                                | -0.106 | -0.309 |
| DAAKGVDPDWAARLPD | RNA POLYMERASE BETA-SUBUNIT AAA21416                                         | -0.108 | -0.310 |
| GGIGPIIIPDTTILP  | YP_177963; PPE FAMILY PROTEIN                                                | 0.064  | -0.310 |
| FGSGVSGLYNTGGLP  | YP_177963; PPE FAMILY PROTEIN                                                | -0.196 | -0.310 |
| TFDTACSSGLMAVHL  | MYCOBACTERIUM BOVIS MYCOCEROSIC ACID SYNTHASE GENE; M95808                   | -0.022 | -0.310 |
| LVRGLDTIATGNIL   | PROBABLE ISOCITRATE DEHYDROGENASE CAA16247                                   | -0.130 | -0.311 |
| ANFGFLNFGSYNTGI  | YP_177963; PPE FAMILY PROTEIN                                                | -0.090 | -0.311 |
| GMERRTQAAVFATEL  | TWO COMPONENT TRANSCRIPTIONAL REGULATORY PROTEIN DEVR NP_217649              | 0.317  | -0.311 |
| RKVVDGVVSDEIVYL  | RNA POLYMERASE BETA-SUBUNIT AAA21416                                         | -0.274 | -0.311 |
| VSSLNLDGPTLAKIF  | PERIPLASMIC PHOSPHATE-BINDING LIPOPROTEIN PSTS3 YP_177768                    | -0.189 | -0.311 |

|                  |                                                                        |        |        |
|------------------|------------------------------------------------------------------------|--------|--------|
| DVNPVGGLEEVLYEL  | RNA POLYMERASE BETA-SUBUNIT AAA21416                                   | -0.075 | -0.311 |
| GTGNIGFFNSGTGNW  | YP_177963; PPE FAMILY PROTEIN                                          | 0.114  | -0.312 |
| TALNQSLIINLGLAD  | YP_177963; PPE FAMILY PROTEIN                                          | -0.208 | -0.313 |
| GLGNVGNYNVGLGNV  | YP_177963; PPE FAMILY PROTEIN                                          | 0.148  | -0.313 |
| GFNPGSTNTGWFTNG  | YP_177963; PPE FAMILY PROTEIN                                          | -0.012 | -0.313 |
| GLGNIGFGNTGTNNL  | YP_177963; PPE FAMILY PROTEIN                                          | 0.057  | -0.313 |
| SGFANFGSLGSGVLN  | YP_177963; PPE FAMILY PROTEIN                                          | -0.138 | -0.313 |
| HATLVSDKKEDEEGV  | CAB06237.1; CONSERVED HYPOTHETICAL PROTEIN                             | 0.253  | -0.314 |
| IGKLLDNDKSPSRKT  | PROBABLE ISOCITRATE DEHYDROGENASE CAA16247                             | -0.117 | -0.314 |
| TPTFRPSWPDHSRDQ  | PUTATIVE CYCLOPROPANE-FATTY-ACYL-PHOSPHOLIPID SYNTHASE UFAA1 NP_854118 | -0.126 | -0.314 |
| FTGLIAIHGLKASDV  | MTB81 (publication)                                                    | -0.224 | -0.314 |
| MHVVVASYNEFGGLS  | POSSIBLE GLYCOSYL TRANSFERASE CAB05419                                 | 0.023  | -0.314 |
| GPVAASAAPSIPAAN  | CAA17582.1; PROBABLE SERINE PROTEASE PEPD                              | -0.096 | -0.314 |
| FMDLKEAARKLETGD  | MTB48 AAK31576                                                         | -0.216 | -0.315 |
| RAVDRAAQIAGADAK  | CAB08889.1; IRON-REGULATED CONSERVED HYPOTHETICAL PROTEIN              | -0.069 | -0.315 |
| LGFGNIGDVNLGFGN  | YP_177963; PPE FAMILY PROTEIN                                          | 0.249  | -0.315 |
| GVGNIIGFGNTGTNNL | YP_177963; PPE FAMILY PROTEIN                                          | 0.344  | -0.315 |
| LAQIKAGDKVLIHSA  | MYCOBACTERIUM BOVIS MYCOCEROSIC ACID SYNTHASE GENE; M95808             | -0.013 | -0.315 |
| NEALPGTDIDPDSFW  | MTB81 (publication)                                                    | -0.220 | -0.316 |
| EINSARMYAGPGSAS  | CAE55371.1; PPE FAMILY PROTEIN                                         | -0.184 | -0.316 |
| GNGGTGSTGLFNAGN  | YP_177963; PPE FAMILY PROTEIN                                          | 0.020  | -0.316 |
| GGGVTLQAAPTLD    | 60 kDa chaperonin 2 P0A521                                             | -0.278 | -0.316 |
| VIHDEDSVMPPHQQ   | HYPOTHETICAL PROTEIN RV2623 NP_217139                                  | -0.051 | -0.316 |
| CPILAEPGGSFNTAV  | CONSERVED HYPOTHETICAL PROTEIN CAA15739                                | -0.098 | -0.316 |
| FGTAFAMTVPPSLVA  | PPE FAMILY PROTEIN CAE55334                                            | -0.340 | -0.316 |
| IPATPGFGNTTTAPS  | YP_177963; PPE FAMILY PROTEIN                                          | -0.240 | -0.317 |
| HVKQLVEENHLRWDS  | PROBABLE ISOCITRATE DEHYDROGENASE CAA16247                             | -0.105 | -0.317 |
| DEDDIKATYDKGILT  | CAA17245.1; HEAT SHOCK PROTEIN HSPX                                    | -0.192 | -0.317 |
| WDADDYYDPEPGVPG  | MYCOBACTERIUM BOVIS MYCOCEROSIC ACID SYNTHASE GENE; M95808             | -0.122 | -0.317 |
| NLFGNIGGGNVGFG   | YP_177963; PPE FAMILY PROTEIN                                          | -0.000 | -0.318 |
| TPIGDPIEYRSLARV  | MYCOBACTERIUM BOVIS MYCOCEROSIC ACID SYNTHASE GENE; M95808             | -0.164 | -0.318 |
| RRLWENAGSPEVDTN  | 3-OXOACYL-[ACYL-CARRIER PROTEIN] SYNTHASE 2 KASB CAA94642              | -0.066 | -0.318 |
| AAYCEMALAAAAEVF  | MYCOBACTERIUM BOVIS MYCOCEROSIC ACID SYNTHASE GENE; M95808             | -0.077 | -0.319 |
| GTGSTGLFNAGNFNT  | YP_177963; PPE FAMILY PROTEIN                                          | 0.138  | -0.319 |
| VNTGWLNTGNTNTGI  | YP_177963; PPE FAMILY PROTEIN                                          | 0.219  | -0.319 |
| IAIGGAATGIAAVLT  | LIPOPROTEIN LPQH PRECURSOR P0A5J0                                      | -0.203 | -0.319 |
| RGGPGGAPGCWQPIT  | MCE-FAMILY PROTEIN MCE1AYP_177701                                      | -0.163 | -0.319 |
| LKLISPDQSDNAVFR  | TRANSMEMBRANE SERINE/THREONINE-PROTEIN KINASE D PKND NP_215446         | 0.010  | -0.319 |
| RADEEQQALSSQMG   | CAA17966.1; 10 KDA CULTURE FILTRATE ANTIGEN ESXB                       | -0.175 | -0.319 |
| ASRWGGPPVASEVRG  | POSSIBLE GLYCOSYL TRANSFERASE CAB05415                                 | -0.105 | -0.320 |
| KISDGDKLAGRHGK   | RNA POLYMERASE BETA-SUBUNIT AAA21416                                   | -0.220 | -0.320 |
| RSLVRIVGVVATTL   | PROBABLE CUTINASE PRECURSOR CFP21 NP_216500                            | -0.108 | -0.320 |
| FKAQFEAAGLTYEHR  | CAA17111.1; PROBABLE ISOCITRATE DEHYDROGENASE                          | -0.056 | -0.320 |
| AVVAANLPELVEGLR  | MYCOBACTERIUM BOVIS MYCOCEROSIC ACID SYNTHASE GENE; M95808             | -0.268 | -0.320 |
| LVTASDFAYLVDFGI  | TRANSMEMBRANE SERINE/THREONINE-PROTEIN KINASE D PKND NP_215446         | -0.059 | -0.320 |
| NTGAFNSGSFNNGAL  | YP_177963; PPE FAMILY PROTEIN                                          | 0.210  | -0.320 |
| LLPFGGRFVEIGKAD  | MYCOBACTERIUM BOVIS MYCOCEROSIC ACID SYNTHASE GENE; M95808             | -0.051 | -0.320 |
| GALPICGDDRLHGM   | HYPOTHETICAL PROTEIN RV2626C NP_217142                                 | -0.047 | -0.321 |
| RPELAMVDSARGISN  | PROBABLE ISOCITRATE DEHYDROGENASE CAA16247                             | -0.135 | -0.321 |
| TMEQTYGVRPGAVVG  | MYCOBACTERIUM BOVIS MYCOCEROSIC ACID SYNTHASE GENE; M95808             | -0.214 | -0.321 |
| MTPRSLVRIVGVVVA  | PROBABLE CUTINASE PRECURSOR CFP21 NP_216500                            | -0.039 | -0.321 |
| AAAGSFASVTTGLAG  | PPE FAMILY PROTEIN CAE55504                                            | -0.126 | -0.322 |
| SAPQGLEYYVAFLGA  | MYCOBACTERIUM BOVIS ACYL-COA SYNTHASE GENE; U75685                     | -0.000 | -0.322 |
| KRLPMSTRLGIRLVI  | POSSIBLE GLYCOSYL TRANSFERASE CAB05419                                 | -0.270 | -0.323 |
| LPKFPGLPGLPSLPD  | CAB06237.1; CONSERVED HYPOTHETICAL PROTEIN                             | -0.248 | -0.323 |
| LNIHQTFSLGPLVVP  | YP_177963; PPE FAMILY PROTEIN                                          | -0.215 | -0.323 |
| GTFARPMTELVTKKA  | 3-OXOACYL-[ACYL-CARRIER PROTEIN] SYNTHASE 2 KASB CAA94642              | -0.018 | -0.323 |
| SWLFPYHDMGLVIGI  | MYCOBACTERIUM BOVIS ACYL-COA SYNTHASE GENE; U75685                     | -0.154 | -0.323 |
| LGNVGSYNLGFANVG  | YP_177963; PPE FAMILY PROTEIN                                          | -0.006 | -0.323 |
| RAPKAVKEYARKHPH  | PROBABLE ISOCITRATE DEHYDROGENASE CAA16247                             | -0.085 | -0.323 |
| NIGFFNSGTGNFGVF  | YP_177963; PPE FAMILY PROTEIN                                          | -0.051 | -0.324 |
| VYGNTRLGLFPFRRG  | MYCOBACTERIUM BOVIS MYCOCEROSIC ACID SYNTHASE GENE; M95808             | -0.200 | -0.324 |
| DNQTGIGGLNSGAGN  | YP_177963; PPE FAMILY PROTEIN                                          | 0.321  | -0.324 |

|                 |                                                                              |        |        |
|-----------------|------------------------------------------------------------------------------|--------|--------|
| ALYDAAVGHGDRGPV | MYCOBACTERIUM BOVIS MYCOCEROSIC ACID SYNTHASE GENE; M95808                   | -0.298 | -0.324 |
| TEVQGEFVDIGGYA  | PROBABLE ISOCITRATE DEHYDROGENASE CAA16247                                   | -0.234 | -0.324 |
| FEQACPGQTLNNTAN | PERIPLASMIC PHOSPHATE-BINDING LIPOPROTEIN PSTS3 YP_177768                    | -0.041 | -0.325 |
| RSPGVYFDETDKST  | RNA POLYMERASE BETA-SUBUNIT AAA21416                                         | -0.115 | -0.325 |
| YTIPLDTPPAPAPP  | YP_177963; PPE FAMILY PROTEIN                                                | -0.052 | -0.325 |
| HEIDARDTKLGAEI  | RNA POLYMERASE BETA-SUBUNIT AAA21416                                         | -0.114 | -0.325 |
| GKLDKTKAVNPESTF | PROBABLE ISOCITRATE DEHYDROGENASE CAA16247                                   | -0.062 | -0.325 |
| GSVSSGLLRHAHCPV | HYPOTHETICAL PROTEIN RV2623 NP_217139                                        | -0.123 | -0.325 |
| SGLGLPPGMGNILG  | YP_177963; PPE FAMILY PROTEIN                                                | -0.154 | -0.325 |
| VGNVGLSTIAGRLG  | CAB08889.1; IRON-REGULATED CONSERVED HYPOTHETICAL PROTEIN                    | -0.694 | -0.325 |
| TSIAISMYCPSVMAD | CONSERVED HYPOTHETICAL PROTEIN CAA15739                                      | -0.175 | -0.326 |
| PESFKVLLKELQSLC | RNA POLYMERASE BETA-SUBUNIT AAA21416                                         | -0.426 | -0.326 |
| SPAVYLLDGLRAQDD | CAB10044.1; SECRETED ANTIGEN 85-B FBPB (85B)                                 | -0.551 | -0.326 |
| GLVGFSYSIEITGST | YP_177963; PPE FAMILY PROTEIN                                                | -0.168 | -0.326 |
| DTDPLPVVFPIVQGE | CAA98382.1; IMMUNOGENIC PROTEIN MPT64                                        | -0.264 | -0.327 |
| SGMFNVSTLGSAPAV | YP_177963; PPE FAMILY PROTEIN                                                | -0.321 | -0.327 |
| GTAVKAFLQSTIGAG | PERIPLASMIC PHOSPHATE-BINDING LIPOPROTEIN PSTS3 YP_177768                    | -0.189 | -0.327 |
| VKPHDSGERANLEQA | MYCOBACTERIUM BOVIS MYCOCEROSIC ACID SYNTHASE GENE; M95808                   | -0.123 | -0.327 |
| RIPLDVAEGDVIYS  | CAB01005.1; 10 KDA CHAPERONIN GROES                                          | -0.175 | -0.327 |
| VIVRELTEVQGEVPD | PROBABLE ISOCITRATE DEHYDROGENASE CAA16247                                   | -0.253 | -0.328 |
| QFAEIGRGSGLAAG  | CONSERVED HYPOTHETICAL PROTEIN CAB08634                                      | -0.187 | -0.328 |
| VPDIHDVALMEDRAT | MTB81 (publication)                                                          | -0.206 | -0.328 |
| RRMGRDKATLPLPGG | CAA16030.1; PROBABLE MOLYBDOPTERIN-GUANINE DINUCLEOTIDE BIOSYNTHESIS PROTEIN | 0.242  | -0.328 |
| VPHGESGKVGIRVF  | RNA POLYMERASE BETA-SUBUNIT AAA21416                                         | -0.231 | -0.329 |
| SSLLKSLEGTYRLAP | CONSERVED HYPOTHETICAL PROTEIN TB16.3CAD97060                                | -0.250 | -0.330 |
| PFDLPTVVIDRIPVE | YP_177963; PPE FAMILY PROTEIN                                                | -0.215 | -0.330 |
| PYLVMGTGASLAPYN | MCE-FAMILY PROTEIN MCE1AYP_177701                                            | -0.362 | -0.330 |
| NSGSYNTGIGNSGTG | YP_177963; PPE FAMILY PROTEIN                                                | 0.009  | -0.330 |
| TETGIRLTPKVIATN | MYCOBACTERIUM BOVIS MYCOCEROSIC ACID SYNTHASE GENE; M95808                   | -0.186 | -0.331 |
| PLPVVFPVIGTELSK | CAA98382.1; IMMUNOGENIC PROTEIN MPT64                                        | -0.085 | -0.331 |
| FPGGLTFPANSLNL  | YP_177963; PPE FAMILY PROTEIN                                                | -0.264 | -0.331 |
| NIVTSAGGDPVAITI | PERIPLASMIC PHOSPHATE-BINDING LIPOPROTEIN PSTS3 YP_177768                    | -0.156 | -0.333 |
| RQKDAATAQTLQAFL | PERIPLASMIC PHOSPHATE-BINDING LIPOPROTEIN PSTS1 YP_177770                    | -0.172 | -0.334 |
| DALKSHGPGQTECAS | MYCOBACTERIUM BOVIS MYCOCEROSIC ACID SYNTHASE GENE; M95808                   | -0.106 | -0.334 |
| DNNALGQFTAQIADL | PPE FAMILY PROTEIN CAE55489                                                  | -0.079 | -0.334 |
| IVNANTVLDDLNSRM | MCE-FAMILY PROTEIN MCE1AYP_177701                                            | -0.063 | -0.334 |
| GAAEKQDPLSGLTDQ | TWO COMPONENT TRANSCRIPTIONAL REGULATORY PROTEIN DEVR NP_217649              | -0.145 | -0.335 |
| SDQDAMARLGAIKRE | MYCOBACTERIUM BOVIS ACYL-COA SYNTHASE GENE; U75685                           | -0.090 | -0.336 |
| FANTGTNNLGIGLTG | YP_177963; PPE FAMILY PROTEIN                                                | -0.101 | -0.336 |
| SSVPPIVPPTPGFG  | YP_177963; PPE FAMILY PROTEIN                                                | -0.278 | -0.336 |
| GTECASLSWSVQDTP | MYCOBACTERIUM BOVIS MYCOCEROSIC ACID SYNTHASE GENE; M95808                   | -0.037 | -0.336 |
| QALNRDFTLPGERIH | PERIPLASMIC PHOSPHATE-BINDING LIPOPROTEIN PSTS3 YP_177768                    | 0.294  | -0.336 |
| PQGEQSTGKIYFVDT | CAB06500.1; IMMUNOGENIC PROTEIN MPT63                                        | -0.280 | -0.337 |
| SGAGIAQAAAGTVNI | PERIPLASMIC PHOSPHATE-BINDING LIPOPROTEIN PSTS1 YP_177770                    | -0.178 | -0.337 |
| VKKPETINYRTLKPE | RNA POLYMERASE BETA-SUBUNIT AAA21417                                         | 0.234  | -0.337 |
| VRVYVAQKRKISDGD | RNA POLYMERASE BETA-SUBUNIT AAA21416                                         | -0.124 | -0.337 |
| RSCQTDVDGANDDWN | POSSIBLE HEMOLYSIN CAA16235                                                  | 0.040  | -0.338 |
| ALGRSVCMPVVAPGG | CAB10947.1; PROBABLE LIPOPROTEIN LPRJ                                        | -0.194 | -0.338 |
| MHFEAYPPEVNSANI | PPE FAMILY PROTEIN CAE55489                                                  | -0.112 | -0.338 |
| TWVEEHQDCVAASDL | MYCOBACTERIUM BOVIS MYCOCEROSIC ACID SYNTHASE GENE; M95808                   | 0.037  | -0.339 |
| TGIGGLNSGAGNIGL | YP_177963; PPE FAMILY PROTEIN                                                | -0.099 | -0.339 |
| FSLGPLVVPDIVIPA | YP_177963; PPE FAMILY PROTEIN                                                | -0.300 | -0.339 |
| VLLCCSGVATAAPKT | CAA98382.1; IMMUNOGENIC PROTEIN MPT64                                        | -0.195 | -0.340 |
| VGAPVDALVNLADEE | CAB08889.1; IRON-REGULATED CONSERVED HYPOTHETICAL PROTEIN                    | 0.058  | -0.340 |
| AGSPEFQRHRDKIVQ | ALTERNATE RNA POLYMERASE SIGMA FACTOR SIGF CAB07069                          | -0.102 | -0.340 |
| PSSKLGGLWKTVSPH | CAE55371.1; PPE FAMILY PROTEIN                                               | -0.182 | -0.340 |
| QGVQKQWDATATELN | CAE55648                                                                     | -0.011 | -0.340 |
| LGWQQRALPEVGDGE | MYCOBACTERIUM BOVIS MYCOCEROSIC ACID SYNTHASE GENE; M95808                   | -0.119 | -0.341 |
| RPITPTFRPSWPDHS | PUTATIVE CYCLOPROPANE-FATTY-ACYL-PHOSPHOLIPID SYNTHASE UFAA1 NP_854118       | -0.156 | -0.341 |
| L TSAERGPQMLGG  | CAE55371.1; PPE FAMILY PROTEIN                                               | -0.219 | -0.341 |
| VAVAGAILVAGLSG  | LIPOPROTEIN LPQH PRECURSOR P0A5J0                                            | -0.018 | -0.341 |
| VNDALSGGLPPPWWQ | PPE FAMILY PROTEIN CAE55504                                                  | -0.600 | -0.341 |
| QDKGYAVPDYPADPK | PROBABLE ISOCITRATE DEHYDROGENASE CAA16247                                   | -0.087 | -0.341 |

|                  |                                                                 |        |        |
|------------------|-----------------------------------------------------------------|--------|--------|
| FFNSGTANFGLFNSG  | YP_177963; PPE FAMILY PROTEIN                                   | -0.123 | -0.341 |
| APSSGFFNSGDGGVS  | YP_177963; PPE FAMILY PROTEIN                                   | -0.132 | -0.341 |
| ANTKKVAMAAPMFSI  | POSSIBLE GLYCOSYL TRANSFERASE CAB05419                          | 0.019  | -0.342 |
| VRSEAPLVGTGMELR  | RNA POLYMERASE BETA-SUBUNIT AAA21416                            | 0.187  | -0.342 |
| GLGDKFGESIVNANT  | MCE-FAMILY PROTEIN MCE1AYP_177701                               | -0.074 | -0.342 |
| AVRGLRMGTGTSERD  | MYCOBACTERIUM BOVIS MYCOCEROSIC ACID SYNTHASE GENE; M95808      | -0.039 | -0.342 |
| PGPESMLAAAAWDG   | PPE FAMILY PROTEIN CAE55334                                     | 0.019  | -0.342 |
| LIASAYLPQHEDAR   | CAB08889.1; IRON-REGULATED CONSERVED HYPOTHETICAL PROTEIN       | -0.276 | -0.343 |
| GDKVLIHSATGGVGQ  | MYCOBACTERIUM BOVIS MYCOCEROSIC ACID SYNTHASE GENE; M95808      | -0.098 | -0.343 |
| GTSLRALLKQYGPLT  | TRANSMEMBRANE SERINE/THREONINE-PROTEIN KINASE D PKND NP_215446  | 0.175  | -0.343 |
| GPGVTALVMGGTDSL  | PPE FAMILY PROTEIN CAE55504                                     | -0.295 | -0.344 |
| AAHKGLMNIALAISA  | PERIPLASMIC PHOSPHATE-BINDING LIPOPROTEIN PSTS1 YP_177770       | -0.085 | -0.344 |
| NWMKRADHSMIFVFI  | POSSIBLE HEMOLYSIN-LIKE PROTEIN CAA17201                        | -0.227 | -0.344 |
| FFNSGTGNFGVFNSG  | YP_177963; PPE FAMILY PROTEIN                                   | -0.116 | -0.344 |
| PPAVVKLSDALIATI  | PERIPLASMIC PHOSPHATE-BINDING LIPOPROTEIN PSTS1 YP_177770       | -0.201 | -0.345 |
| HRATLGQPLDWFCFLF | MYCOBACTERIUM BOVIS MYCOCEROSIC ACID SYNTHASE GENE; M95808      | -0.155 | -0.345 |
| GGLNSGTGNLGLFNS  | YP_177963; PPE FAMILY PROTEIN                                   | -0.149 | -0.345 |
| EVYEAEDTRKHRVVA  | TRANSMEMBRANE SERINE/THREONINE-PROTEIN KINASE D PKND NP_215446  | 0.189  | -0.345 |
| EPVNPPKPPPAIKID  | MTB48 AAK31576                                                  | -0.163 | -0.345 |
| GTAVLAGASLVAVSW  | POSSIBLE HEMOLYSIN-LIKE PROTEIN CAA17201                        | -0.155 | -0.346 |
| APGGGQFTLPGRSLM  | MTB81 (publication)                                             | 0.051  | -0.346 |
| ATLAHVVRPFVLARS  | POSSIBLE GLYCOSYL TRANSFERASE CAB05418                          | -0.168 | -0.347 |
| TGSFNAGNTNTGGFN  | YP_177963; PPE FAMILY PROTEIN                                   | -0.090 | -0.347 |
| GITGNGQIGFGKPAN  | PPE FAMILY PROTEIN CAE55504                                     | -0.231 | -0.347 |
| QVMGDLDKLTGNMIS  | CAB06237.1; CONSERVED HYPOTHETICAL PROTEIN                      | -0.280 | -0.348 |
| SGSTAQENAMEQFVY  | PERIPLASMIC PHOSPHATE-BINDING LIPOPROTEIN PSTS2 YP_177769       | -0.106 | -0.348 |
| DYLPGEAAAAARSADV | POSSIBLE GLYCOSYL TRANSFERASE CAB05415                          | -0.083 | -0.348 |
| SALAAADPLTSGLL   | PPE FAMILY PROTEIN CAE55334                                     | 0.151  | -0.348 |
| QAMASTEGRNVTGMFA | CAE55648                                                        | -0.125 | -0.348 |
| HVSRLAKSLARLRD   | ALTERNATE RNA POLYMERASE SIGMA FACTOR SIGF CAB07069             | -0.350 | -0.348 |
| ELRAIDAATSSSQE   | RNA POLYMERASE BETA-SUBUNIT AAA21416                            | -0.146 | -0.348 |
| IAATSFAAAGLAALA  | CAA98373.1; MAJOR SECRETED IMMUNOGENIC PROTEIN                  | -0.063 | -0.349 |
| VARAQGMSQDMAQTF  | CONSERVED HYPOTHETICAL PROTEIN CAA15739                         | -0.062 | -0.349 |
| YRADIYALACVLGEC  | TRANSMEMBRANE SERINE/THREONINE-PROTEIN KINASE D PKND NP_215446  | -0.242 | -0.349 |
| FNTGVANVGSYNTGS  | YP_177963; PPE FAMILY PROTEIN                                   | -0.114 | -0.349 |
| ANDDWNPAKRGERE   | POSSIBLE HEMOLYSIN CAA16235                                     | -0.034 | -0.349 |
| SFNTGIGNSGTGSTG  | YP_177963; PPE FAMILY PROTEIN                                   | 0.070  | -0.349 |
| EALPFAAIVGAALV   | CONSERVED HYPOTHETICAL PROTEIN CAB08634                         | -0.149 | -0.349 |
| MLRLNAGLGNVGNYN  | YP_177963; PPE FAMILY PROTEIN                                   | -0.240 | -0.350 |
| GTVGIEIWHGDNVGN  | MYCOBACTERIUM BOVIS ACYL-COA SYNTHASE GENE; U75685              | 0.165  | -0.350 |
| CIECPDGTVGIEIWH  | MYCOBACTERIUM BOVIS ACYL-COA SYNTHASE GENE; U75685              | -0.008 | -0.350 |
| LADVGSVNVGFGNVG  | YP_177963; PPE FAMILY PROTEIN                                   | 0.050  | -0.350 |
| ILEADDEGYPKRARM  | CONSERVED HYPOTHETICAL PROTEIN TB16.3CAD97060                   | -0.222 | -0.350 |
| YDDGRPSQVRLDTAV  | CONSERVED HYPOTHETICAL PROTEIN TB18.5CAD93033                   | -0.215 | -0.350 |
| VAAIKEFFGTSQLSQ  | RNA POLYMERASE BETA-SUBUNIT AAA21416                            | -0.136 | -0.350 |
| AITRVVVRDQPARQL  | HYPOTHETICAL PROTEIN RV2623 NP_217139                           | -0.127 | -0.351 |
| MELARAVKDVAGARS  | TWO COMPONENT TRANSCRIPTIONAL REGULATORY PROTEIN DEVR NP_217649 | -0.225 | -0.351 |
| MSAYKTVVVGTDGSD  | CAB08889.1; IRON-REGULATED CONSERVED HYPOTHETICAL PROTEIN       | -0.111 | -0.352 |
| GSTRTPAGVVMASHQN | MYCOBACTERIUM BOVIS ACYL-COA SYNTHASE GENE; U75685              | -0.189 | -0.352 |
| MADVASGNLPALPDM  | CONSERVED HYPOTHETICAL PROTEIN CAA15739                         | -0.198 | -0.352 |
| VLVRRKAGEVEYVPS  | RNA POLYMERASE BETA-SUBUNIT AAA21416                            | -0.294 | -0.352 |
| VAGFDAEFFGISERE  | MYCOBACTERIUM BOVIS MYCOCEROSIC ACID SYNTHASE GENE; M95808      | -0.215 | -0.352 |
| NEGDQIDKGDVVVLL  | CAB08316.1; BIOTINYLATED PROTEIN TB7.3                          | -0.117 | -0.352 |
| PPEINSVLMYSGAGS  | YP_177963; PPE FAMILY PROTEIN                                   | -0.240 | -0.353 |
| WSFAVGKQLNMAQII  | PERIPLASMIC PHOSPHATE-BINDING LIPOPROTEIN PSTS2 YP_177769       | -0.186 | -0.353 |
| VKNYVSRLAKLGME   | TWO COMPONENT TRANSCRIPTIONAL REGULATORY PROTEIN DEVR NP_217649 | -0.301 | -0.353 |
| APPPIAHSTVLVAPV  | PPE FAMILY PROTEIN CAE55489                                     | -0.244 | -0.353 |
| LGQGRAGGGAALGGG  | MTB48 AAK31576                                                  | -0.095 | -0.353 |
| RHLPEHAIVQFVKAI  | HYPOTHETICAL PROTEIN RV2626C NP_217142                          | -0.138 | -0.353 |
| EGYPKRARMLMDAAI  | CONSERVED HYPOTHETICAL PROTEIN TB16.3CAD97060                   | -0.193 | -0.353 |
| GTYYNREPVDASVLA  | CAB01474.1; CONSERVED HYPOTHETICAL PROTEIN CFP17                | -0.342 | -0.354 |
| LLAASAGILSAAAF   | CONSERVED HYPOTHETICAL PROTEIN CAA15739                         | -0.137 | -0.354 |

|                  |                                                                |        |        |
|------------------|----------------------------------------------------------------|--------|--------|
| VPSEVDYMDVSPRQ   | RNA POLYMERASE BETA-SUBUNIT AAA21416                           | 0.014  | -0.354 |
| GFGNIGDANFGFGNS  | YP_177963; PPE FAMILY PROTEIN                                  | 0.040  | -0.354 |
| PIHLGLTGQANYGFA  | YP_177963; PPE FAMILY PROTEIN                                  | -0.091 | -0.354 |
| AVLEDPYILLVSSKV  | 60 kDa chaperonin 2 P0A521                                     | -0.096 | -0.355 |
| KKVAMAAPMF5IIP   | POSSIBLE GLYCOSYL TRANSFERASE CAB05419                         | -0.236 | -0.355 |
| VNARGGPGGAPGCWQ  | MCE-FAMILY PROTEIN MCE1AYP_177701                              | -0.087 | -0.355 |
| RKAMLQDMAILTGGQ  | 60 kDa chaperonin 2 P0A521                                     | -0.246 | -0.355 |
| SAVVLNCGGSPTTQQ  | POSSIBLE GLYCOSYL TRANSFERASE CAB05418                         | -0.203 | -0.355 |
| IPNISDEVLADLDER  | RNA POLYMERASE BETA-SUBUNIT AAA21416                           | -0.613 | -0.356 |
| RLVSRLLTLGWQQR   | MYCOBACTERIUM BOVIS MYCOCEROSIC ACID SYNTHASE GENE; M95808     | -0.471 | -0.357 |
| VINTTCNYGQVVAAL  | LOW MOLECULAR WEIGHT T-CELL ANTIGEN TB8.4 NP_215690            | -0.172 | -0.357 |
| QANLGEAAGTYVAAD  | CONSERVED HYPOTHETICAL PROTEIN TB9.8 CAD93159                  | -0.139 | -0.357 |
| LDGTPEVIDFAHLE   | CAA17111.1; PROBABLE ISOCITRATE DEHYDROGENASE                  | -0.130 | -0.358 |
| DYMDVSPRQMVSAT   | RNA POLYMERASE BETA-SUBUNIT AAA21416                           | -0.144 | -0.358 |
| TLAAGSNNQTVLPFD  | TRANSMEMBRANE SERINE/THREONINE-PROTEIN KINASE D PKND NP_215446 | -0.153 | -0.359 |
| DCPPPGYDITALLQA  | MYCOBACTERIUM BOVIS MYCOCEROSIC ACID SYNTHASE GENE; M95808     | 0.039  | -0.359 |
| AKGLSTHEGALLSER  | SECRETED L-ALANINE DEHYDROGENASE ALD CAA15575                  | -0.161 | -0.359 |
| IPMSGIAMAVVGGAL  | CAB06237.1; CONSERVED HYPOTHETICAL PROTEIN                     | -0.064 | -0.359 |
| AVSPEVATWLEVPLP  | HYPOTHETICAL PROTEIN RV2623 NP_217139                          | -0.199 | -0.360 |
| DKPEKASVPGGGD    | 60 kDa chaperonin 2 P0A521                                     | -0.106 | -0.360 |
| TTLAYTAATITMFTV  | POSSIBLE HEMOLYSIN-LIKE PROTEIN CAA17201                       | -0.228 | -0.360 |
| KVQPAVFAVQVALAA  | MYCOBACTERIUM BOVIS MYCOCEROSIC ACID SYNTHASE GENE; M95808     | -0.226 | -0.360 |
| GWQERYPNVAITRVV  | HYPOTHETICAL PROTEIN RV2623 NP_217139                          | -0.234 | -0.361 |
| ANSGNVNTGAFISGN  | YP_177963; PPE FAMILY PROTEIN                                  | -0.102 | -0.361 |
| AEVRDITFEQMLLLD  | MYCOBACTERIUM BOVIS MYCOCEROSIC ACID SYNTHASE GENE; M95808     | -0.153 | -0.361 |
| ANFGSLGSGVLNFGS  | YP_177963; PPE FAMILY PROTEIN                                  | -0.205 | -0.362 |
| GNAGLAAGLAGVGNI  | YP_177963; PPE FAMILY PROTEIN                                  | 0.127  | -0.362 |
| NRFGAAVGVLAAGAL  | PERIPLASMIC PHOSPHATE-BINDING LIPOPROTEIN PSTS3 YP_177768      | -0.043 | -0.362 |
| AAGGGPSQLASMGSQ  | CAB06237.1; CONSERVED HYPOTHETICAL PROTEIN                     | -0.193 | -0.363 |
| QLSGLSSAGTALNQS  | YP_177963; PPE FAMILY PROTEIN                                  | -0.320 | -0.363 |
| CWPAAPRSVGVPYLYL | POSSIBLE HEMOLYSIN-LIKE PROTEIN CAA17201                       | -0.177 | -0.363 |
| PAVISGFGNLGNHVS  | YP_177963; PPE FAMILY PROTEIN                                  | -0.122 | -0.363 |
| GLFNSGSYNTGIGNS  | YP_177963; PPE FAMILY PROTEIN                                  | -0.140 | -0.363 |
| FAPNLGERLIIHRDT  | POSSIBLE GLYCOSYL TRANSFERASE CAB05419                         | -0.142 | -0.364 |
| SERLLTLGWQQRALP  | MYCOBACTERIUM BOVIS MYCOCEROSIC ACID SYNTHASE GENE; M95808     | -0.201 | -0.364 |
| PIDAVASIDAPGVVN  | MYCOBACTERIUM BOVIS MYCOCEROSIC ACID SYNTHASE GENE; M95808     | -0.042 | -0.364 |
| YTPFALLALPAHDGR  | POSSIBLE HEMOLYSIN-LIKE PROTEIN CAA17201                       | -0.206 | -0.364 |
| DVNLGFGNIGDVNLG  | YP_177963; PPE FAMILY PROTEIN                                  | -0.093 | -0.364 |
| AWTEAVIGNRRRQDS  | MTB48 AAK31576                                                 | -0.084 | -0.366 |
| STASAGTVGLIKAIL  | MYCOBACTERIUM BOVIS MYCOCEROSIC ACID SYNTHASE GENE; M95808     | -0.161 | -0.366 |
| GAATAGAFSRPGLPV  | CAB10044.1; SECRETED ANTIGEN 85-B FBPB (85B)                   | -0.238 | -0.366 |
| WRGAAGTAAQAAVVR  | CAA17966.1; 10 KDA CULTURE FILTRATE ANTIGEN ESXB               | -0.083 | -0.367 |
| TIKAERTEQKDFDGR  | CAA17245.1; HEAT SHOCK PROTEIN HSPX                            | -0.077 | -0.367 |
| QQRALPEVGDGEAGS  | MYCOBACTERIUM BOVIS MYCOCEROSIC ACID SYNTHASE GENE; M95808     | -0.103 | -0.367 |
| GIDDSPAAQVAVRWA  | HYPOTHETICAL PROTEIN RV2623 NP_217139                          | -0.235 | -0.367 |
| AGGGLSGVLRVPPRP  | CAE55371.1; PPE FAMILY PROTEIN                                 | -0.092 | -0.367 |
| KIFNGTITVWNDPQI  | PERIPLASMIC PHOSPHATE-BINDING LIPOPROTEIN PSTS2 YP_177769      | -0.129 | -0.367 |
| NYGDPVDAKALGQSV  | CONSERVED HYPOTHETICAL PROTEIN CAA15739                        | -0.178 | -0.368 |
| HTKHVRVSKPAALV   | CAE55335.1; PE FAMILY PROTEIN                                  | 0.319  | -0.368 |
| LPGAAYCEMALAAAA  | MYCOBACTERIUM BOVIS MYCOCEROSIC ACID SYNTHASE GENE; M95808     | -0.169 | -0.368 |
| GISEREATSIDPQQR  | MYCOBACTERIUM BOVIS MYCOCEROSIC ACID SYNTHASE GENE; M95808     | -0.077 | -0.368 |
| GLILTNNHVIAAAAK  | CAA17582.1; PROBABLE SERINE PROTEASE PEPD                      | 0.078  | -0.368 |
| EDPYILLVSSKVSTV  | 60 kDa chaperonin 2 P0A521                                     | -0.135 | -0.369 |
| EGGALLLIETEEHAK  | 3-OXOACYL-[ACYL-CARRIER PROTEIN] SYNTHASE 2 KASB CAA94642      | -0.152 | -0.369 |
| RGLGEAQLGNSSGNF  | PERIPLASMIC PHOSPHATE-BINDING LIPOPROTEIN PSTS1 YP_177770      | -0.155 | -0.369 |
| ETNRDGETTRHATAA  | MYCOBACTERIUM BOVIS MYCOCEROSIC ACID SYNTHASE GENE; M95808     | -0.262 | -0.369 |
| GVGVGASGNNGTAL   | PERIPLASMIC PHOSPHATE-BINDING LIPOPROTEIN PSTS2 YP_177769      | 0.064  | -0.369 |
| KTDDVAGDGTTTATV  | 60 kDa chaperonin 2 P0A521                                     | -0.109 | -0.370 |
| WNQAQTEVAGAGSGF  | YP_177963; PPE FAMILY PROTEIN                                  | -0.241 | -0.370 |
| GRSDLKTVPANAFVA  | POSSIBLE GLYCOSYL TRANSFERASE CAB05415                         | -0.143 | -0.370 |
| LINGVNIPATPGFGN  | YP_177963; PPE FAMILY PROTEIN                                  | -0.262 | -0.370 |
| NSEEFDAIADNLEK   | CAA17111.1; PROBABLE ISOCITRATE DEHYDROGENASE                  | -0.182 | -0.371 |
| GSPETGAGAGTVATT  | PERIPLASMIC PHOSPHATE-BINDING LIPOPROTEIN PSTS1 YP_177770      | -0.208 | -0.371 |
| GQVWEATATVNAIRG  | CAB06500.1; IMMUNOGENIC PROTEIN MPT63                          | -0.116 | -0.372 |
| GDDRLHGMILTDRDI  | HYPOTHETICAL PROTEIN RV2626C NP_217142                         | -0.200 | -0.372 |

|                  |                                                              |        |        |
|------------------|--------------------------------------------------------------|--------|--------|
| MTNHPRYSPPPPQPG  | CAA17582.1; PROBABLE SERINE PROTEASE PEPD                    | -0.062 | -0.372 |
| CQGDLMGSHQDWQAQ  | CAA16102.1; ESAT-6 LIKE PROTEIN ESXQ                         | -0.108 | -0.372 |
| ASAFQSVVWGLTVGS  | CAE55371.1; PPE FAMILY PROTEIN                               | -0.185 | -0.372 |
| CAPILGGYPAVLTS   | MYCOBACTERIUM BOVIS ACYL-COA SYNTHASE GENE; U75685           | 0.093  | -0.372 |
| KTIVLKPEVPLDDGD  | PROBABLE ISOCITRATE DEHYDROGENASE CAA16247                   | -0.149 | -0.373 |
| NAKWVPLYSTKNTIL  | CAA17111.1; PROBABLE ISOCITRATE DEHYDROGENASE                | -0.087 | -0.373 |
| GAYKAPAETQAQRIA  | CAA17343.1; HEAT SHOCK PROTEIN HSP                           | 0.011  | -0.373 |
| AGRHPDSDIFLDDVT  | CAB01474.1; CONSERVED HYPOTHETICAL PROTEIN CFP17             | -0.110 | -0.373 |
| APTLDLKLKLEGDEAT | 60 kDa chaperonin 2 P0A521                                   | -0.235 | -0.374 |
| GSIIYVKPKMHGPAE  | MTB81 (publication)                                          | -0.198 | -0.374 |
| TGLPLRGLVLSAAVV  | MYCOBACTERIUM BOVIS MYCOCEROSIC ACID SYNTHASE GENE; M95808   | -0.139 | -0.374 |
| GFGPIAVPSVTIPAL  | YP_177963; PPE FAMILY PROTEIN                                | -0.292 | -0.375 |
| FFNTGGGGSGSFSNS  | YP_177963; PPE FAMILY PROTEIN                                | -0.088 | -0.375 |
| GGQFTLPGRSLMFVR  | MTB81 (publication)                                          | 0.092  | -0.375 |
| GVFNSGSYNTGVGNA  | YP_177963; PPE FAMILY PROTEIN                                | -0.144 | -0.376 |
| LTSLSAAERGPQGM   | CAE55371.1; PPE FAMILY PROTEIN                               | -0.227 | -0.376 |
| QHEDARAADILKDES  | CAB08889.1; IRON-REGULATED CONSERVED HYPOTHETICAL PROTEIN    | 0.149  | -0.376 |
| AVADAQATLAQLPPG  | PPE FAMILY PROTEIN CAE55334                                  | -0.228 | -0.376 |
| LTLPLKFPGLPLPS   | CAB06237.1; CONSERVED HYPOTHETICAL PROTEIN                   | -0.285 | -0.376 |
| VNPVLRQGNNSDRAP  | PROBABLE ISOCITRATE DEHYDROGENASE CAA16247                   | -0.243 | -0.376 |
| IDPQRLLLLETSRRA  | MYCOBACTERIUM BOVIS MYCOCEROSIC ACID SYNTHASE GENE; M95808   | -0.254 | -0.377 |
| RLDTAVQGIETYIH   | CONSERVED HYPOTHETICAL PROTEIN TB18.5CAD93033                | -0.169 | -0.377 |
| QTDVDGANDDWNPAS  | POSSIBLE HEMOLYSIN CAA16235                                  | 0.118  | -0.377 |
| TWQTKSGGTRTGNVT  | CAB09453.1; PROBABLE SERINE PROTEASE PEPA                    | 0.108  | -0.377 |
| PAVTIFPNGISIPNN  | YP_177963; PPE FAMILY PROTEIN                                | -0.219 | -0.377 |
| IYRKLRPGEPTKES   | RNA POLYMERASE BETA-SUBUNIT AAA21416                         | -0.207 | -0.378 |
| KESAQTLLNLFKE    | RNA POLYMERASE BETA-SUBUNIT AAA21416                         | -0.060 | -0.379 |
| VLSWLSHDQVHNVA   | MYCOBACTERIUM BOVIS MYCOCEROSIC ACID SYNTHASE GENE; M95808   | -0.099 | -0.379 |
| AASVGATSEIEPFI   | YP_177963; PPE FAMILY PROTEIN                                | -0.194 | -0.380 |
| LPADTAALTSAGRE   | MTB48 AAK31576                                               | -0.246 | -0.380 |
| LTVRVAGAYKAPAET  | CAA17343.1; HEAT SHOCK PROTEIN HSP                           | -0.160 | -0.380 |
| REQVRHLVRITRELA  | MYCOBACTERIUM BOVIS MYCOCEROSIC ACID SYNTHASE GENE; M95808   | -0.156 | -0.380 |
| TGNIGLFNSGTGNIG  | YP_177963; PPE FAMILY PROTEIN                                | 0.022  | -0.380 |
| WRGNFEGLFGLNVI   | YP_177963; PPE FAMILY PROTEIN                                | -0.169 | -0.381 |
| YPNVTITAQGTSGA   | PERIPLASMIC PHOSPHATE-BINDING LIPOPROTEIN PSTS1 YP_177770    | -0.200 | -0.381 |
| TGPYSMITQQPLGGK  | RNA POLYMERASE BETA-SUBUNIT AAA21416                         | -0.160 | -0.381 |
| AQDPVATAASNNPML  | CAA98350.1; CELL SURFACE LIPOPROTEIN MPT83                   | -0.155 | -0.382 |
| IAFLAGCSSTKPVSQ  | CAA98350.1; CELL SURFACE LIPOPROTEIN MPT83                   | -0.186 | -0.382 |
| IDGFSTPITIDRIP   | YP_177963; PPE FAMILY PROTEIN                                | -0.315 | -0.382 |
| LAAAAWDGVAAELT   | PPE FAMILY PROTEIN CAE55334                                  | -0.135 | -0.383 |
| KERKHRIEDAVRNAK  | 60 kDa chaperonin 2 P0A521                                   | -0.198 | -0.383 |
| GSTGDRVVISAPQGL  | MYCOBACTERIUM BOVIS ACYL-COA SYNTHASE GENE; U75685           | -0.054 | -0.383 |
| RLAKSLARLRDQLE   | ALTERNATE RNA POLYMERASE SIGMA FACTOR SIGF CAB07069          | -0.253 | -0.384 |
| IFAVVRGTATNQDGR  | MYCOBACTERIUM BOVIS MYCOCEROSIC ACID SYNTHASE GENE; M95808   | -0.096 | -0.384 |
| AAANQAVTPAARALP  | CAE55371.1; PPE FAMILY PROTEIN                               | -0.154 | -0.384 |
| EEEFKAQFEAAGLTY  | CAA17111.1; PROBABLE ISOCITRATE DEHYDROGENASE                | -0.186 | -0.385 |
| MLPRSPIVRIVSDT   | MYCOBACTERIUM BOVIS ACYL-COA SYNTHASE GENE; U75685           | -0.147 | -0.385 |
| TLARVAFIGEHEPS   | POSSIBLE GLYCOSYL TRANSFERASE CAB05419                       | -0.297 | -0.386 |
| SHDKTFEIPEDGVAN  | PROBABLE ISOCITRATE DEHYDROGENASE CAA16247                   | -0.263 | -0.386 |
| PGIPESFKVLLKELQ  | RNA POLYMERASE BETA-SUBUNIT AAA21416                         | 0.241  | -0.387 |
| KLTPWKAPPIAHST   | PPE FAMILY PROTEIN CAE55489                                  | 0.163  | -0.387 |
| AAASLAAIAFLAG    | CAA98350.1; CELL SURFACE LIPOPROTEIN MPT83                   | -0.109 | -0.388 |
| GNAGTASTGLFNVGG  | YP_177963; PPE FAMILY PROTEIN                                | -0.095 | -0.388 |
| LAAAGCGSKPPSGSP  | PERIPLASMIC PHOSPHATE-BINDING LIPOPROTEIN PSTS1 YP_177770    | -0.148 | -0.388 |
| KLGGWLKTVSPHRSP  | CAE55371.1; PPE FAMILY PROTEIN                               | -0.146 | -0.389 |
| NDTAPSSGFFNTGG   | YP_177963; PPE FAMILY PROTEIN                                | -0.132 | -0.389 |
| AWGKGAGKSFQGGVG  | PERIPLASMIC PHOSPHATE-BINDING LIPOPROTEIN PSTS3 YP_177768    | -0.186 | -0.389 |
| STGLFNAGGFTTGLA  | YP_177963; PPE FAMILY PROTEIN                                | -0.169 | -0.389 |
| GNIGLGNAGSNNVGF  | YP_177963; PPE FAMILY PROTEIN                                | 0.001  | -0.390 |
| DNTVGTDEALLDIYR  | RNA POLYMERASE BETA-SUBUNIT AAA21416                         | -0.077 | -0.390 |
| SGMTSQAATFAANRL  | PROBABLE CUTINASE PRECURSOR CFP21 NP_216500                  | 0.091  | -0.390 |
| EGTVQAESAGAVGGD  | MTB48 AAK31576                                               | 0.048  | -0.390 |
| QAAGQARLAASAFE   | PPE FAMILY PROTEIN CAE55504                                  | -0.013 | -0.391 |
| GNSLKVGNADVCCG   | CAA98373.1; MAJOR SECRETED IMMUNOGENIC PROTEIN               | -0.073 | -0.391 |
| AYTLARGRRHRPVRT  | MYCOBACTERIUM BOVIS MYCOCEROSIC ACID SYNTHASE GENE; M95808   | -0.001 | -0.391 |
| GQYDSVSVSEMIEAV  | PUTATIVE CYCLOPROPANE-FATTY-ACYL-PHOSPHOLIPID SYNTHASE UFAA1 | -0.063 | -0.392 |

|                  |                                                                |        |        |
|------------------|----------------------------------------------------------------|--------|--------|
|                  | NP_854118                                                      |        |        |
| RLVDAPLPWTHARL   | MYCOBACTERIUM BOVIS MYCOCEROSIC ACID SYNTHASE GENE; M95808     | 0.065  | -0.392 |
| RLAASAFEATLAATV  | PPE FAMILY PROTEIN CAE55504                                    | -0.108 | -0.392 |
| GNFGVFNSGSYNTGV  | YP_177963; PPE FAMILY PROTEIN                                  | 0.006  | -0.392 |
| GNPNRPDGGILTRFG  | PPE FAMILY PROTEIN CAE55504                                    | 0.010  | -0.393 |
| QGELSKQTGGQVSIA  | CAA98382.1; IMMUNOGENIC PROTEIN MPT64                          | -0.222 | -0.393 |
| ASLVGFNRAPAGPSG  | CAA17582.1; PROBABLE SERINE PROTEASE PEPD                      | -0.208 | -0.393 |
| ITSAGRHPDSDIFLD  | CAB01474.1; CONSERVED HYPOTHETICAL PROTEIN CFP17               | 0.163  | -0.393 |
| PGEPTKESAQTLLE   | RNA POLYMERASE BETA-SUBUNIT AAA21416                           | -0.195 | -0.394 |
| VGSAQPIVIPTIGE   | PPE FAMILY PROTEIN CAE55334                                    | -0.442 | -0.394 |
| TVTLTFTPADGSAPI  | CAA17111.1; PROBABLE ISOCITRATE DEHYDROGENASE                  | 0.161  | -0.394 |
| GFANVGDVNLGAGNL  | YP_177963; PPE FAMILY PROTEIN                                  | 0.068  | -0.394 |
| AYAIAKHGTVGVKCAT | CAA17111.1; PROBABLE ISOCITRATE DEHYDROGENASE                  | -0.097 | -0.395 |
| GSAVNPVLRQGNDR   | PROBABLE ISOCITRATE DEHYDROGENASE CAA16247                     | -0.233 | -0.395 |
| ALSSSHGLSVADLV   | MYCOBACTERIUM BOVIS ACYL-COA SYNTHASE GENE; U75685             | -0.155 | -0.395 |
| AERTEQKDFDGRSEF  | CAA17245.1; HEAT SHOCK PROTEIN HSPX                            | -0.083 | -0.396 |
| TAALRAAEDDCPPPG  | MYCOBACTERIUM BOVIS MYCOCEROSIC ACID SYNTHASE GENE; M95808     | -0.080 | -0.396 |
| FMQAAIGPGQEGLDQ  | PERIPLASMIC PHOSPHATE-BINDING LIOPROTEIN PSTS2 YP_177769       | -0.067 | -0.396 |
| LLDEGKQSLTKLAAA  | CAE55648                                                       | -0.223 | -0.396 |
| VRASLERMAPLVDRQ  | MTB81 (publication)                                            | -0.062 | -0.396 |
| MDPGSKVTYNGVEIG  | MCE-FAMILY PROTEIN MCE1AYP_177701                              | -0.117 | -0.397 |
| MPHPQQAPVLGVVDG  | HYPOTHETICAL PROTEIN RV2623 NP_217139                          | -0.166 | -0.398 |
| ELAAQTDDQQLAEHF  | PROBABLE ISOCITRATE DEHYDROGENASE CAA16247                     | -0.165 | -0.398 |
| RIFTDGDHTLYADVP  | POSSIBLE GLYCOSYL TRANSFERASE CAB05415                         | -0.137 | -0.399 |
| SPSGVAVDSAGNVYV  | TRANSMEMBRANE SERINE/THREONINE-PROTEIN KINASE D PKND NP_215446 | 0.312  | -0.399 |
| QHLTMANIVTSAGGD  | PERIPLASMIC PHOSPHATE-BINDING LIOPROTEIN PSTS3 YP_177768       | -0.094 | -0.399 |
| RALAQYLADTLAEEQ  | MYCOBACTERIUM BOVIS MYCOCEROSIC ACID SYNTHASE GENE; M95808     | -0.220 | -0.399 |
| SALQNAASIAGLFLT  | 60 kDa chaperonin 2 P0A521                                     | -0.117 | -0.399 |
| RHDIQQLAALGDVYA  | MCE-FAMILY PROTEIN MCE1AYP_177701                              | -0.209 | -0.399 |
| VRAFMQAAIGPGQEG  | PERIPLASMIC PHOSPHATE-BINDING LIOPROTEIN PSTS2 YP_177769       | -0.191 | -0.400 |
| PAVADHVAVALFGE   | PROBABLE CUTINASE PRECURSOR CFP21 NP_216500                    | -0.159 | -0.400 |
| SIDAPGVVNFVETN   | MYCOBACTERIUM BOVIS MYCOCEROSIC ACID SYNTHASE GENE; M95808     | -0.017 | -0.401 |
| LPLGTPALVSGLGNV  | YP_177963; PPE FAMILY PROTEIN                                  | -0.253 | -0.401 |
| ARGTHQASGLGDVGE  | PROBABLE CUTINASE PRECURSOR CFP21 NP_216500                    | -0.173 | -0.401 |
| IALAITNTARPWIG   | PPE FAMILY PROTEIN CAE55334                                    | -0.174 | -0.403 |
| FEATLAATVSPAMVA  | PPE FAMILY PROTEIN CAE55504                                    | -0.066 | -0.403 |
| RGKLDGTPEVIDFAH  | CAA17111.1; PROBABLE ISOCITRATE DEHYDROGENASE                  | -0.180 | -0.403 |
| GHPSSATDEPEPHW   | PPE FAMILY PROTEIN CAE55334                                    | -0.265 | -0.403 |
| LVDINETLNLGPVHI  | YP_177963; PPE FAMILY PROTEIN                                  | -0.202 | -0.404 |
| ANSGNVDTGALMSGN  | YP_177963; PPE FAMILY PROTEIN                                  | -0.149 | -0.404 |
| NFQLSQGGQGFAIPI  | CAB09453.1; PROBABLE SERINE PROTEASE PEPA                      | -0.122 | -0.405 |
| SDLAYTLARGRRHRP  | MYCOBACTERIUM BOVIS MYCOCEROSIC ACID SYNTHASE GENE; M95808     | -0.099 | -0.405 |
| AMSNLLGQNAAIIA   | YP_177963; PPE FAMILY PROTEIN                                  | -0.252 | -0.405 |
| GSAKSNMGHSTASAG  | MYCOBACTERIUM BOVIS MYCOCEROSIC ACID SYNTHASE GENE; M95808     | -0.099 | -0.405 |
| MALASLAARGTTGGG  | PPE FAMILY PROTEIN CAE55334                                    | -0.090 | -0.405 |
| HWAITDGNKASFLDQ  | PERIPLASMIC PHOSPHATE-BINDING LIOPROTEIN PSTS1 YP_177770       | -0.161 | -0.405 |
| IGLFNSGTGNIGFFN  | YP_177963; PPE FAMILY PROTEIN                                  | -0.083 | -0.405 |
| LSKQTGGQVSIAPNA  | CAA98382.1; IMMUNOGENIC PROTEIN MPT64                          | -0.259 | -0.406 |
| QTLTLRLLAASAGIL  | CONSERVED HYPOTHETICAL PROTEIN CAA15739                        | -0.193 | -0.406 |
| LSVPHSWTTAAPEIQ  | PPE FAMILY PROTEIN CAE55334                                    | -0.212 | -0.406 |
| LGLTGQANYGFAVPD  | YP_177963; PPE FAMILY PROTEIN                                  | -0.114 | -0.407 |
| VGTLSGVLNVGSGI   | YP_177963; PPE FAMILY PROTEIN                                  | -0.075 | -0.407 |
| ISEAGQAMASTEAGNV | CAE55648                                                       | -0.199 | -0.407 |
| HLVEGVARVLTKPRF  | POSSIBLE HEMOLYSIN-LIKE PROTEIN CAA17201                       | -0.432 | -0.408 |
| EEVGLTLENADLSLL  | 60 kDa chaperonin 2 P0A521                                     | -0.155 | -0.408 |
| LRAQVMGDLDKLTGN  | CAB06237.1; CONSERVED HYPOTHETICAL PROTEIN                     | -0.491 | -0.409 |
| VITVEESNTFGLQLE  | 60 kDa chaperonin 2 P0A521                                     | -0.185 | -0.409 |
| TIDAIELPAISFSQS  | YP_177963; PPE FAMILY PROTEIN                                  | -0.229 | -0.410 |
| GFGNIGDANFGLGNA  | YP_177963; PPE FAMILY PROTEIN                                  | 0.137  | -0.410 |
| NAGHTNTGGFNTGNV  | YP_177963; PPE FAMILY PROTEIN                                  | 0.104  | -0.410 |
| CTGGGNIMAHVSYVQ  | PROBABLE CUTINASE PRECURSOR CFP21 NP_216500                    | -0.172 | -0.410 |
| SEEGSGIILSAEGLI  | CAA17582.1; PROBABLE SERINE PROTEASE PEPD                      | -0.166 | -0.410 |
| PGGSFNTAVASVVAR  | CONSERVED HYPOTHETICAL PROTEIN CAA15739                        | -0.155 | -0.410 |
| NAGLVCGGVHTANAT  | CAA98350.1; CELL SURFACE LIOPROTEIN MPT83                      | -0.115 | -0.410 |
| KDQTSDEVTVETTSV  | CAB01474.1; CONSERVED HYPOTHETICAL PROTEIN CFP17               | -0.138 | -0.410 |

|                  |                                                                              |        |        |
|------------------|------------------------------------------------------------------------------|--------|--------|
| PDRWDADDYYDPEPG  | MYCOBACTERIUM BOVIS MYCOCEROSIC ACID SYNTHASE GENE; M95808                   | -0.261 | -0.411 |
| YLQYTSGSTRTAGV   | MYCOBACTERIUM BOVIS ACYL-COA SYNTHASE GENE; U75685                           | -0.194 | -0.411 |
| ATPSSGFFNSGAGGV  | YP_177963; PPE FAMILY PROTEIN                                                | -0.260 | -0.411 |
| FFNSGAGGVSGFGNF  | YP_177963; PPE FAMILY PROTEIN                                                | -0.174 | -0.411 |
| VTYNGVEIGRVDITIS | MCE-FAMILY PROTEIN MCE1AYP_177701                                            | -0.076 | -0.412 |
| TSTGGIGPIIPDIT   | YP_177963; PPE FAMILY PROTEIN                                                | 0.123  | -0.412 |
| QIDQVESTAGSLQGG  | CAA17966.1; 10 KDA CULTURE FILTRATE ANTIGEN ESXB                             | -0.216 | -0.413 |
| NALGGNRPAVYAPKS  | 3-OXOACYL-[ACYL-CARRIER PROTEIN] SYNTHASE 2 KASB CAA94642                    | -0.125 | -0.413 |
| GVAVDSAGNVVYTSE  | TRANSMEMBRANE SERINE/THREONINE-PROTEIN KINASE D PKND NP_215446               | -0.113 | -0.413 |
| SGLYNTAIVGLGTPA  | YP_177963; PPE FAMILY PROTEIN                                                | -0.462 | -0.413 |
| AADAGFTAPATLLS   | YP_177963; PPE FAMILY PROTEIN                                                | -0.280 | -0.414 |
| MAELAPDTVPLAGVV  | CAA16030.1; PROBABLE MOLYBDOPTERIN-GUANINE DINUCLEOTIDE BIOSYNTHESIS PROTEIN | -0.498 | -0.415 |
| LPTDRPIIYATLGSS  | POSSIBLE GLYCOSYL TRANSFERASE CAB05418                                       | -0.340 | -0.415 |
| SQESGVIEEVADYI   | RNA POLYMERASE BETA-SUBUNIT AAA21416                                         | -0.139 | -0.417 |
| DAATLAQEAGNFERI  | CAA17966.1; 10 KDA CULTURE FILTRATE ANTIGEN ESXB                             | -0.175 | -0.417 |
| AINAHLTGNAAMGAF  | YP_177963; PPE FAMILY PROTEIN                                                | -0.183 | -0.417 |
| AVDGAGTVVYVDFNN  | TRANSMEMBRANE SERINE/THREONINE-PROTEIN KINASE D PKND NP_215446               | -0.225 | -0.417 |
| AAEYGRRLRHGQILFT | SECRETED L-ALANINE DEHYDROGENASE ALD CAA15575                                | -0.229 | -0.417 |
| DSVERLIAAHLMDPA  | TRANSMEMBRANE SERINE/THREONINE-PROTEIN KINASE D PKND NP_215446               | -0.601 | -0.417 |
| GGLNSGAGNIGLFNS  | YP_177963; PPE FAMILY PROTEIN                                                | -0.144 | -0.418 |
| DQQEILNRANEVEAP  | MTB48 AAK31576                                                               | -0.159 | -0.418 |
| GNGQIGFGKPNPDV   | PPE FAMILY PROTEIN CAE55504                                                  | -0.163 | -0.419 |
| LYRRDGSYIITGGLG  | MYCOBACTERIUM BOVIS MYCOCEROSIC ACID SYNTHASE GENE; M95808                   | -0.120 | -0.419 |
| VGFGNIGHGNGVFGN  | YP_177963; PPE FAMILY PROTEIN                                                | -0.002 | -0.419 |
| GCILADSRQSKTAAS  | RNA POLYMERASE BETA-SUBUNIT AAA21416                                         | -0.086 | -0.419 |
| YIHAVYYPGENQIQT  | CONSERVED HYPOTHETICAL PROTEIN TB18.5CAD93033                                | 0.163  | -0.419 |
| EFRVAITPAGVAELT  | SECRETED L-ALANINE DEHYDROGENASE ALD CAA15575                                | -0.154 | -0.419 |
| NCQSILGYVVRWVDQ  | MTB81 (publication)                                                          | -0.098 | -0.419 |
| GSRGRGGYAGMLVGS  | HYPOTHETICAL PROTEIN RV2623 NP_217139                                        | -0.199 | -0.420 |
| CVEQYRQDQFARLDA  | MYCOBACTERIUM BOVIS ACYL-COA SYNTHASE GENE; U75685                           | -0.134 | -0.420 |
| TAPSRACQGDLMGMSH | CAA16102.1; ESAT-6 LIKE PROTEIN ESXQ                                         | -0.088 | -0.421 |
| SILGYVVRWVDQGVG  | MTB81 (publication)                                                          | -0.255 | -0.421 |
| IGGGNVGFGNIGDAN  | YP_177963; PPE FAMILY PROTEIN                                                | 0.038  | -0.422 |
| ILTYHVAVAGQTSAN  | CAA98373.1; MAJOR SECRETED IMMUNOGENIC PROTEIN                               | -0.292 | -0.422 |
| FNTGVANAGSYNTGS  | YP_177963; PPE FAMILY PROTEIN                                                | -0.199 | -0.422 |
| LTEIGYLLPEPDDFT  | MTB81 (publication)                                                          | -0.131 | -0.422 |
| DAAICGGVETRIEAV  | 3-OXOACYL-[ACYL-CARRIER PROTEIN] SYNTHASE 2 KASB CAA94642                    | -0.201 | -0.422 |
| TFDTRLMRLEDEMKE  | CAA17245.1; HEAT SHOCK PROTEIN HSPX                                          | -0.105 | -0.422 |
| YLILSARDVLAVVSK  | CAB01005.1; 10 KDA CHAPERONIN GROES                                          | -0.008 | -0.423 |
| RQRLATSLRNAAKAY  | MTB48 AAK31576                                                               | -0.246 | -0.423 |
| ETSQTPSAAIDSDRW  | PUTATIVE CYCLOPROPANE-FATTY-ACYL-PHOSPHOLIPID SYNTHASE UFAA1 NP_854118       | -0.113 | -0.423 |
| GQLTIKAERTEQKDF  | CAA17245.1; HEAT SHOCK PROTEIN HSPX                                          | -0.082 | -0.424 |
| RQLVQRSEEAQLVVV  | HYPOTHETICAL PROTEIN RV2623 NP_217139                                        | -0.150 | -0.424 |
| LGSASGFANFGTQLS  | YP_177963; PPE FAMILY PROTEIN                                                | -0.181 | -0.424 |
| FDETIDKSTDKTLHS  | RNA POLYMERASE BETA-SUBUNIT AAA21416                                         | -0.064 | -0.424 |
| SVAVKAPGFGDRRKA  | 60 kDa chaperonin 2 P0A521                                                   | -0.071 | -0.425 |
| SGQPSIIDAAIAELR  | YP_177963; PPE FAMILY PROTEIN                                                | 0.193  | -0.426 |
| QLQLVAAGGGPSQL   | CAB06237.1; CONSERVED HYPOTHETICAL PROTEIN                                   | -0.332 | -0.426 |
| LLGSHVRLTEEPERH  | MYCOBACTERIUM BOVIS MYCOCEROSIC ACID SYNTHASE GENE; M95808                   | -0.167 | -0.426 |
| RMAPLVDRQNAGDVA  | MTB81 (publication)                                                          | 0.048  | -0.427 |
| NAGSYNTGSFNVGDT  | YP_177963; PPE FAMILY PROTEIN                                                | -0.154 | -0.428 |
| DTSPKPAATSPAAPVT | CAA98350.1; CELL SURFACE LIPOPROTEIN MPT83                                   | -0.327 | -0.428 |
| SAAVSYGVSIVSTLIV | PPE FAMILY PROTEIN CAE55334                                                  | -0.374 | -0.428 |
| LGSELTMTDTVGQVV  | CAB06500.1; IMMUNOGENIC PROTEIN MPT63                                        | -0.293 | -0.428 |
| PGALGENGNGGMVTG  | PERIPLASMIC PHOSPHATE-BINDING LIPOPROTEIN PSTS1 YP_177770                    | -0.188 | -0.429 |
| PGGAPGCWQPITRD   | MCE-FAMILY PROTEIN MCE1AYP_177701                                            | -0.154 | -0.429 |
| QQVNYNLPGVSEHLK  | PERIPLASMIC PHOSPHATE-BINDING LIPOPROTEIN PSTS1 YP_177770                    | -0.203 | -0.430 |
| FGNTGTNNLIGLGTG  | YP_177963; PPE FAMILY PROTEIN                                                | -0.152 | -0.430 |
| PVTVIAATAGRSCLK  | POSSIBLE GLYCOSYL TRANSFERASE CAB05415                                       | -0.243 | -0.430 |
| LSGKLNPDVNLVDTL  | CAA98350.1; CELL SURFACE LIPOPROTEIN MPT83                                   | -0.245 | -0.431 |
| ACGNDDNVTGGGATT  | PERIPLASMIC PHOSPHATE-BINDING LIPOPROTEIN PSTS3 YP_177768                    | -0.118 | -0.432 |
| LVMGGTDSLPLPNI   | PPE FAMILY PROTEIN CAE55504                                                  | -0.311 | -0.432 |

|                  |                                                                |        |        |
|------------------|----------------------------------------------------------------|--------|--------|
| VVPSVVMLETDLGRQ  | CAA17582.1; PROBABLE SERINE PROTEASE PEPD                      | 0.075  | -0.434 |
| LDVEMTAVQRSFNRT  | PPE FAMILY PROTEIN CAE55489                                    | -0.281 | -0.434 |
| SQVGTAVKAFQSTI   | PERIPLASMIC PHOSPHATE-BINDING LIOPROTEIN PSTS3 YP_177768       | -0.296 | -0.435 |
| ALTFQDPSGGSSRTVQ | CAA17582.1; PROBABLE SERINE PROTEASE PEPD                      | -0.149 | -0.435 |
| MRSERLRWLVAEAGP  | CONSERVED HYPOTHETICAL PROTEIN CAB08634                        | -0.123 | -0.436 |
| QLVAAGGGPSQLASM  | CAB06237.1; CONSERVED HYPOTHETICAL PROTEIN                     | -0.321 | -0.436 |
| SGGSGQPSIIDAAIA  | YP_177963; PPE FAMILY PROTEIN                                  | -0.021 | -0.436 |
| ARRFEGRGEPRDDLI  | ALTERNATE RNA POLYMERASE SIGMA FACTOR SIGF CAB07069            | -0.136 | -0.436 |
| DAFPNEFPDPTISVQ  | YP_177963; PPE FAMILY PROTEIN                                  | -0.278 | -0.436 |
| LVGLAGGAATAGAFS  | CAB10044.1; SECRETED ANTIGEN 85-B FBPB (85B)                   | -0.165 | -0.436 |
| AWRNGDWYVARLTPS  | MYCOBACTERIUM BOVIS MYCOCEROSIC ACID SYNTHASE GENE; M95808     | -0.192 | -0.437 |
| AIELPAISFSQSIPI  | YP_177963; PPE FAMILY PROTEIN                                  | -0.249 | -0.438 |
| NVFATANAIGILFL   | PPE FAMILY PROTEIN CAE55504                                    | -0.098 | -0.438 |
| DITAPWGIAVDEAGT  | TRANSMEMBRANE SERINE/THREONINE-PROTEIN KINASE D PKND NP_215446 | -0.120 | -0.438 |
| GNSGLAAGLAGMGNI  | YP_177963; PPE FAMILY PROTEIN                                  | 0.204  | -0.438 |
| LLAMLTSGGSGGSGQ  | YP_177963; PPE FAMILY PROTEIN                                  | -0.280 | -0.438 |
| EFRQAARRLAEAFGP  | POSSIBLE GLYCOSYL TRANSFERASE CAB05418                         | -0.314 | -0.439 |
| EQTPIDAVASIDAPG  | MYCOBACTERIUM BOVIS MYCOCEROSIC ACID SYNTHASE GENE; M95808     | -0.222 | -0.439 |
| NANIGFGNRGDANIG  | PPE FAMILY PROTEIN CAE55504                                    | -0.097 | -0.439 |
| TAAQAAVVRFQEAAAN | CAA17966.1; 10 KDA CULTURE FILTRATE ANTIGEN ESXB               | -0.019 | -0.439 |
| AISAGDQSIGDLIAE  | 60 kDa chaperonin 2 P0A521                                     | -0.223 | -0.440 |
| DEASRRNVDLVALHA  | HYPOTHETICAL PROTEIN RV2623 NP_217139                          | -0.129 | -0.440 |
| TIITYLTDEAPLLAT  | PROBABLE ISOCITRATE DEHYDROGENASE CAA16247                     | -0.802 | -0.441 |
| EHTDVERVAQQLLSG  | MYCOBACTERIUM BOVIS MYCOCEROSIC ACID SYNTHASE GENE; M95808     | 0.162  | -0.441 |
| GAGSGFANFGSLGSG  | YP_177963; PPE FAMILY PROTEIN                                  | -0.199 | -0.441 |
| RATLRISQLLANWL   | MTB81 (publication)                                            | -0.225 | -0.441 |
| GIRLVIVLVRRWPKV  | POSSIBLE GLYCOSYL TRANSFERASE CAB05419                         | -0.092 | -0.442 |
| YRATNFKVDQPGTVT  | CAA17111.1; PROBABLE ISOCITRATE DEHYDROGENASE                  | -0.169 | -0.442 |
| VESGKMTKDLAILG   | CAA17111.1; PROBABLE ISOCITRATE DEHYDROGENASE                  | 0.088  | -0.442 |
| QNIAQQLRAQVMGDL  | CAB06237.1; CONSERVED HYPOTHETICAL PROTEIN                     | -0.221 | -0.442 |
| AGISEFNGNQTDFFG  | PERIPLASMIC PHOSPHATE-BINDING LIOPROTEIN PSTS3 YP_177768       | -0.089 | -0.442 |
| GDLNVGLGNVGGGNV  | YP_177963; PPE FAMILY PROTEIN                                  | -0.003 | -0.443 |
| VSVVASPQSTVIGGT  | MYCOBACTERIUM BOVIS MYCOCEROSIC ACID SYNTHASE GENE; M95808     | -0.316 | -0.443 |
| PVDALVNLADEEKAD  | CAB08889.1; IRON-REGULATED CONSERVED HYPOTHETICAL PROTEIN      | -0.792 | -0.443 |
| GWRAACRSNPALAKG  | SECRETED L-ALANINE DEHYDROGENASE ALD CAA15575                  | -0.194 | -0.443 |
| ILKDESYKVTGTAPI  | CAB08889.1; IRON-REGULATED CONSERVED HYPOTHETICAL PROTEIN      | -0.251 | -0.444 |
| GPFFGLGVVNISGIE  | YP_177963; PPE FAMILY PROTEIN                                  | 0.042  | -0.444 |
| PGGLSRERAGLEVVD  | RNA POLYMERASE BETA-SUBUNIT AAA21416                           | -0.156 | -0.444 |
| DLQTLFVASDRVPP   | MYCOBACTERIUM BOVIS MYCOCEROSIC ACID SYNTHASE GENE; M95808     | -0.160 | -0.445 |
| GSTLVDINETLNLGP  | YP_177963; PPE FAMILY PROTEIN                                  | -0.178 | -0.445 |
| GIGLTGDNQTGIGGL  | YP_177963; PPE FAMILY PROTEIN                                  | -0.233 | -0.445 |
| ESGTTDNFQRYLQAA  | PERIPLASMIC PHOSPHATE-BINDING LIOPROTEIN PSTS3 YP_177768       | -0.191 | -0.446 |
| GNGGPGVTALVMGGT  | PPE FAMILY PROTEIN CAE55504                                    | -0.146 | -0.449 |
| DGSAPIVHEMVSIP   | CAA17111.1; PROBABLE ISOCITRATE DEHYDROGENASE                  | -0.417 | -0.449 |
| YQSAIPPRGTQAVVL  | CAA98382.1; IMMUNOGENIC PROTEIN MPT64                          | -0.244 | -0.450 |
| SEFNGNQTDFFGSDV  | PERIPLASMIC PHOSPHATE-BINDING LIOPROTEIN PSTS3 YP_177768       | 0.090  | -0.452 |
| VRSRTDLLSTLPQRV  | CONSERVED HYPOTHETICAL PROTEIN CAB08634                        | -0.257 | -0.453 |
| LAAYPITGKLGSELT  | CAB06500.1; IMMUNOGENIC PROTEIN MPT63                          | -0.071 | -0.454 |
| TQASGQTVLPFTGID  | TRANSMEMBRANE SERINE/THREONINE-PROTEIN KINASE D PKND NP_215446 | -0.191 | -0.454 |
| AIVADIERYPEWNEG  | CONSERVED HYPOTHETICAL PROTEIN TB18.5CAD93033                  | -0.133 | -0.454 |
| GMGEVYEAEDTRKHR  | TRANSMEMBRANE SERINE/THREONINE-PROTEIN KINASE D PKND NP_215446 | 0.001  | -0.455 |
| NTNTGIANSGNVNTG  | YP_177963; PPE FAMILY PROTEIN                                  | -0.113 | -0.455 |
| ERTFGGKIVTPSPGT  | MYCOBACTERIUM BOVIS ACYL-COA SYNTHASE GENE; U75685             | 0.048  | -0.455 |
| IPIDFEKSRSLTAV   | PERIPLASMIC PHOSPHATE-BINDING LIOPROTEIN PSTS3 YP_177768       | -0.177 | -0.455 |
| TGTNNLGIGLTGDNQ  | YP_177963; PPE FAMILY PROTEIN                                  | -0.237 | -0.455 |
| IGFGNRGDANIGIGN  | PPE FAMILY PROTEIN CAE55504                                    | -0.230 | -0.456 |
| NIGFFNSGTANFGLF  | YP_177963; PPE FAMILY PROTEIN                                  | -0.109 | -0.457 |
| RTVSLPVGADEDIDK  | CAA17245.1; HEAT SHOCK PROTEIN HSPX                            | -0.261 | -0.457 |
| LKRGIKAVEKVETET  | 60 kDa chaperonin 2 P0A521                                     | -0.195 | -0.458 |
| VKAFLQSTIGAGQSG  | PERIPLASMIC PHOSPHATE-BINDING LIOPROTEIN PSTS3 YP_177768       | -0.476 | -0.458 |
| TGIGNSGVASTGLVN  | YP_177963; PPE FAMILY PROTEIN                                  | -0.299 | -0.458 |
| KAYGEVDEEAATALD  | MTB48 AAK31576                                                 | -0.290 | -0.458 |
| SGLGNVGDHLSGLLA  | YP_177963; PPE FAMILY PROTEIN                                  | -0.464 | -0.459 |

|                  |                                                                              |        |        |
|------------------|------------------------------------------------------------------------------|--------|--------|
| TGVANSNGNVDTGALM | YP_177963; PPE FAMILY PROTEIN                                                | -0.184 | -0.460 |
| AQQLRAQVMGDLDDL  | CAB06237.1; CONSERVED HYPOTHETICAL PROTEIN                                   | -0.412 | -0.461 |
| DIVVECGNIAEPDTA  | MYCOBACTERIUM BOVIS MYCOCEROSIC ACID SYNTHASE GENE; M95808                   | -0.064 | -0.461 |
| PAIKIDPPPPPEQGG  | MTB48 AAK31576                                                               | -0.129 | -0.463 |
| DKLPAATIDQLKTD   | CAA98350.1; CELL SURFACE LIPOPROTEIN MPT83                                   | -0.360 | -0.464 |
| EIPEDGVANIVDVAT  | PROBABLE ISOCITRATE DEHYDROGENASE CAA16247                                   | -0.210 | -0.464 |
| SLYEADTLARVAIFI  | POSSIBLE GLYCOSYL TRANSFERASE CAB05419                                       | -0.200 | -0.465 |
| QLPPPAVVKLSDALI  | PERIPLASMIC PHOSPHATE-BINDING LIPOPROTEIN PSTS1 YP_177770                    | -0.225 | -0.465 |
| QYGPLTPARAVAIVR  | TRANSMEMBRANE SERINE/THREONINE-PROTEIN KINASE D PKND NP_215446               | -0.176 | -0.465 |
| GMPAGLLSGMALASL  | PPE FAMILY PROTEIN CAE55334                                                  | -0.330 | -0.466 |
| DASGVLDPIITIFPGG | YP_177963; PPE FAMILY PROTEIN                                                | -0.305 | -0.467 |
| LVLDTDSFYRPRKPG  | PERIPLASMIC PHOSPHATE-BINDING LIPOPROTEIN PSTS3 YP_177768                    | -0.261 | -0.468 |
| TGIGGLNSGTGNLGL  | YP_177963; PPE FAMILY PROTEIN                                                | -0.246 | -0.468 |
| LGDLNLGLGNIGNAN  | YP_177963; PPE FAMILY PROTEIN                                                | -0.336 | -0.469 |
| VRRGLVDLLGADPEL  | TWO COMPONENT TRANSCRIPTIONAL REGULATORY PROTEIN DEVR NP_217649              | -0.574 | -0.469 |
| FKVLLKELQSLCLNV  | RNA POLYMERASE BETA-SUBUNIT AAA21416                                         | -0.242 | -0.470 |
| AGDTDAIAGRVAQIR  | 60 kDa chaperonin 2 P0A521                                                   | -0.127 | -0.470 |
| IDAAYAIIKKHGVGVK | CAA17111.1; PROBABLE ISOCITRATE DEHYDROGENASE                                | -0.123 | -0.470 |
| IHIPSIPLGFAAIGH  | YP_177963; PPE FAMILY PROTEIN                                                | -0.255 | -0.470 |
| IVMSTNNDDPAGACR  | 3-OXOACYL-[ACYL-CARRIER PROTEIN] SYNTHASE 2 KASB CAA94642                    | -0.144 | -0.470 |
| GNFLLPDAQSIQAAA  | PERIPLASMIC PHOSPHATE-BINDING LIPOPROTEIN PSTS1 YP_177770                    | -0.109 | -0.471 |
| YGAGTPCALGSAKSN  | MYCOBACTERIUM BOVIS MYCOCEROSIC ACID SYNTHASE GENE; M95808                   | -0.131 | -0.471 |
| WTHARLFIDDDGQEQ  | MYCOBACTERIUM BOVIS MYCOCEROSIC ACID SYNTHASE GENE; M95808                   | -0.254 | -0.471 |
| DALRIVMADSRPLTN  | CAA16030.1; PROBABLE MOLYBDOPTERIN-GUANINE DINUCLEOTIDE BIOSYNTHESIS PROTEIN | -0.310 | -0.472 |
| TITVHPLLGS HVRLT | MYCOBACTERIUM BOVIS MYCOCEROSIC ACID SYNTHASE GENE; M95808                   | -0.422 | -0.472 |
| LRALLKQYGPLTPAR  | TRANSMEMBRANE SERINE/THREONINE-PROTEIN KINASE D PKND NP_215446               | -0.300 | -0.473 |
| NSPDKLWESLLRGDD  | MYCOBACTERIUM BOVIS MYCOCEROSIC ACID SYNTHASE GENE; M95808                   | -0.205 | -0.473 |
| EPMVKMLLNNVLEHL  | CONSERVED HYPOTHETICAL PROTEIN TB18.5CAD93033                                | -0.626 | -0.475 |
| YAIVNNRQKDAATAQ  | PERIPLASMIC PHOSPHATE-BINDING LIPOPROTEIN PSTS1 YP_177770                    | -0.278 | -0.476 |
| STNVGLANMGVGNIG  | YP_177963; PPE FAMILY PROTEIN                                                | -0.019 | -0.476 |
| DYYDLGIEHRDATDD  | CAA17111.1; PROBABLE ISOCITRATE DEHYDROGENASE                                | -0.153 | -0.479 |
| GSAPAVISGFGNLGN  | YP_177963; PPE FAMILY PROTEIN                                                | 0.196  | -0.480 |
| LRISLSVSARLAGIP  | POSSIBLE GLYCOSYL TRANSFERASE CAB05415                                       | -0.481 | -0.481 |
| KTTQTIYIDADPGEV  | CONSERVED HYPOTHETICAL PROTEIN TB16.3CAD97060                                | -0.408 | -0.483 |
| SGLGALPGIGNILG   | YP_177963; PPE FAMILY PROTEIN                                                | -0.271 | -0.486 |
| ALAAAGVQPETVGVV  | MYCOBACTERIUM BOVIS MYCOCEROSIC ACID SYNTHASE GENE; M95808                   | -0.083 | -0.486 |
| ASRMPVLSKTVEVTA  | CONSERVED HYPOTHETICAL PROTEIN TB18.5CAD93033                                | -0.235 | -0.486 |
| VGLGNVNGVTLGYTS  | LIPOPROTEIN LPQH PRECURSOR P0A5J0                                            | -0.385 | -0.487 |
| FVALPAATADAYATT  | CAE55335.1; PE FAMILY PROTEIN                                                | -0.150 | -0.488 |
| KLGLHVGEPTSSTL   | RNA POLYMERASE BETA-SUBUNIT AAA21416                                         | -0.301 | -0.489 |
| TGSNNIGIGLTGDNL  | YP_177963; PPE FAMILY PROTEIN                                                | -0.164 | -0.489 |
| KTVEAEAAHGTVTRH  | CAA17111.1; PROBABLE ISOCITRATE DEHYDROGENASE                                | -0.182 | -0.489 |
| RGLERGLNALADAVK  | 60 kDa chaperonin 2 P0A521                                                   | -0.584 | -0.489 |
| LNSGVLNVGSGISGL  | YP_177963; PPE FAMILY PROTEIN                                                | -0.134 | -0.490 |
| GKTIAGAKIMGQGND  | PERIPLASMIC PHOSPHATE-BINDING LIPOPROTEIN PSTS2 YP_177769                    | -0.150 | -0.490 |
| LLASASIGTLGFTIP  | YP_177963; PPE FAMILY PROTEIN                                                | -0.257 | -0.491 |
| DRLVSAATATGLPLR  | MYCOBACTERIUM BOVIS MYCOCEROSIC ACID SYNTHASE GENE; M95808                   | -0.264 | -0.493 |
| TGVLPPAANDVSVLT  | CAE55335.1; PE FAMILY PROTEIN                                                | -0.257 | -0.495 |
| NTIVDKFLKRLPMS   | POSSIBLE GLYCOSYL TRANSFERASE CAB05419                                       | -0.239 | -0.496 |
| GEVDEEAATALDNDG  | MTB48 AAK31576                                                               | -0.053 | -0.498 |
| PRWEADLDVLDEHGT  | MYCOBACTERIUM BOVIS MYCOCEROSIC ACID SYNTHASE GENE; M95808                   | -0.195 | -0.498 |
| ELLPEAAGPTQVLVP  | CAA98382.1; IMMUNOGENIC PROTEIN MPT64                                        | -0.285 | -0.498 |
| QLVASQSAFAAKAGL  | CONSERVED HYPOTHETICAL PROTEIN TB9.8 CAD93159                                | -0.248 | -0.500 |
| LRIARVLYDFVNNEA  | MTB81                                                                        | -0.343 | -0.500 |
| ASGFANFGTQLSGIL  | YP_177963; PPE FAMILY PROTEIN                                                | -0.276 | -0.501 |
| GIPDPGDFINTGSSL  | CAB06237.1; CONSERVED HYPOTHETICAL PROTEIN                                   | -0.195 | -0.501 |
| PQSTVIGGTS DTVRD | MYCOBACTERIUM BOVIS MYCOCEROSIC ACID SYNTHASE GENE; M95808                   | -0.210 | -0.502 |
| DLADRVDTLVGAGER  | CAA16030.1; PROBABLE MOLYBDOPTERIN-GUANINE DINUCLEOTIDE BIOSYNTHESIS PROTEIN | -0.279 | -0.504 |
| DLSQRLGRAPSASEL  | ALTERNATE RNA POLYMERASE SIGMA FACTOR SIGF CAB07069                          | -0.054 | -0.506 |
| SIGLGFAIPVDQAKR  | CAA17582.1; PROBABLE SERINE PROTEASE PEPD                                    | -0.274 | -0.508 |
| SDIAVVRVQGVSGLT  | CAA17582.1; PROBABLE SERINE PROTEASE PEPD                                    | -0.595 | -0.509 |
| FLLDQAITSAGRHPD  | CAB01474.1; CONSERVED HYPOTHETICAL PROTEIN CFP17                             | -0.771 | -0.509 |

|                    |                                                                        |        |        |
|--------------------|------------------------------------------------------------------------|--------|--------|
| DSL TGA EETL NGLIQ | CAB09453.1; PROBABLE SERINE PROTEASE PEPA                              | -0.322 | -0.513 |
| GSLGSGVLNFGSGVS    | YP_177963; PPE FAMILY PROTEIN                                          | -0.223 | -0.513 |
| AGYAGTLQSLGADIA    | CAA16104.1; SECRETED ESAT-6 LIKE PROTEIN ESXR                          | -0.267 | -0.530 |
| VPDIPAIHIDFDG      | YP_177963; PPE FAMILY PROTEIN                                          | -0.329 | -0.545 |
| LGAANIGDLNVGLGN    | YP_177963; PPE FAMILY PROTEIN                                          | -0.464 | -0.547 |
| LGGGVAANLGRAASV    | CAE55371.1; PPE FAMILY PROTEIN                                         | -0.397 | -0.548 |
| LAGAGSGIANVGT LH   | YP_177963; PPE FAMILY PROTEIN                                          | -0.238 | -0.553 |
| ATLAQLPPGILSDIL    | PPE FAMILY PROTEIN CAE55334                                            | -0.830 | -0.553 |
| ISGFGNLGNHVS GVS   | YP_177963; PPE FAMILY PROTEIN                                          | -0.186 | -0.558 |
| EFLDAIADNLEKELA    | CAA17111.1; PROBABLE ISOCITRATE DEHYDROGENASE                          | -0.338 | -0.558 |
| LGAGFEDIGIKTGNE    | PROBABLE ISOCITRATE DEHYDROGENASE CAA16247                             | -0.114 | -0.570 |
| QSIGDLIAEAMD KVG   | 60 kDa chaperonin 2 P0A521                                             | -0.375 | -0.574 |
| VGEQLSGLSSAGTAL    | YP_177963; PPE FAMILY PROTEIN                                          | -0.240 | -0.590 |
| VEIDLCDYRDVDGQY    | PUTATIVE CYCLOPROPANE-FATTY-ACYL-PHOSPHOLIPID SYNTHASE UFAA1 NP_854118 | -0.312 | -0.598 |
| IKDLAGNVT LQLGNL   | YP_177963; PPE FAMILY PROTEIN                                          | -0.242 | -0.598 |
| RPGDLQTL E FVSDR   | MYCOBACTERIUM BOVIS MYCOCEROSIC ACID SYNTHASE GENE; M95808             | -0.330 | -0.608 |
| TGDIGPATIIPPIHI    | YP_177963; PPE FAMILY PROTEIN                                          | -0.477 | -0.610 |
| GIASTLN PQVGS AQP  | PPE FAMILY PROTEIN CAE55334                                            | -0.195 | -0.611 |
| IKTGNERAKLLGKTL    | PROBABLE ISOCITRATE DEHYDROGENASE CAA16247                             | -0.708 | -0.628 |
| GNVNTGAFISGNFSN    | YP_177963; PPE FAMILY PROTEIN                                          | -0.316 | -0.634 |
| TIPTGPIHIGLPLSL    | YP_177963; PPE FAMILY PROTEIN                                          | -0.622 | -0.643 |
| PLLEKVAKEAADEAK    | CAB07109.1; PROBABLE 50S RIBOSOMAL PROTEIN L7/L12 RPLL                 | -1.083 | -0.647 |
| LDELKLEGDEATGAN    | 60 kDa chaperonin 2 P0A521                                             | -0.391 | -0.655 |
| VAAAVKQVLSGA EFR   | POSSIBLE GLYCOSYL TRANSFERASE CAB05418                                 | -0.606 | -0.679 |
| TIDQLKTD AKLLSSI   | CAA98350.1; CELL SURFACE LIPOPROTEIN MPT83                             | -0.414 | -0.687 |
| NLAELGRLTQLPD TN   | PROBABLE ISOCITRATE DEHYDROGENASE CAA16247                             | -0.627 | -0.693 |
| HVSGVSI DGLLAMLT   | YP_177963; PPE FAMILY PROTEIN                                          | -0.429 | -0.705 |
| AQLPPGILSDILSAL    | PPE FAMILY PROTEIN CAE55334                                            | -0.747 | -0.720 |
| TSTLPLGT PALVSGL   | YP_177963; PPE FAMILY PROTEIN                                          | -0.668 | -0.736 |
| LAVANLAGALPGIV     | MCE-FAMILY PROTEIN MCE1AYP_177701                                      | -0.270 | -0.751 |
| PAIQALNRDFTLPGE    | PERIPLASMIC PHOSPHATE-BINDING LIPOPROTEIN PSTS3 YP_177768              | -0.587 | -0.783 |
| VASHSPQVD PILD DL  | MYCOBACTERIUM BOVIS MYCOCEROSIC ACID SYNTHASE GENE; M95808             | -0.834 | -0.804 |
| AELDSALLAAAGFGN    | MCE-FAMILY PROTEIN MCE1AYP_177701                                      | -0.634 | -0.859 |
| KTLDAAIGKLLDNDK    | PROBABLE ISOCITRATE DEHYDROGENASE CAA16247                             | -0.515 | -0.916 |
| ATVALTFQDP SGGSR   | CAA17582.1; PROBABLE SERINE PROTEASE PEPA                              | -0.628 | -0.921 |
| EKT VKNYVSRL LAKL  | TWO COMPONENT TRANSCRIPTIONAL REGULATORY PROTEIN DEVR NP_217649        | -0.894 | -0.988 |

**Supplementary Table 6b. List of peptides only recognized by IgG and not by IgA**

| Peptides          | Protein                                                    | Average Index |
|-------------------|------------------------------------------------------------|---------------|
| NYPAMMAHAGDMAGY   | CAA16104.1; SECRETED ESAT-6 LIKE PROTEIN ESXR              | 3,357498292   |
| MGCRLPGGINS PDKL  | MYCOBACTERIUM BOVIS MYCOCEROSIC ACID SYNTHASE GENE; M95808 | 3,26634584    |
| MNNLALWSRPVWDVE   | CAA17343.1; HEAT SHOCK PROTEIN HSP                         | 2,562033013   |
| EMWAQDAAVMYSYEG   | PPE FAMILY PROTEIN CAE55334                                | 2,222215455   |
| DMVAACLKWE GGYVW  | CAA17111.1; PROBABLE ISOCITRATE DEHYDROGENASE              | 2,218562879   |
| WSDVDVSEWPGIDWP   | HYPOTHETICAL PROTEIN RV2623 NP_217139                      | 2,053792971   |
| WDINTPAFEWYYQSG   | CAB10044.1; SECRETED ANTIGEN 85-B FBPB (85B)               | 2,007198631   |
| WLADLVRRSPWGEMF   | MYCOBACTERIUM BOVIS MYCOCEROSIC ACID SYNTHASE GENE; M95808 | 2,005375219   |
| PKLVANNTRLWVYCG   | CAB10044.1; SECRETED ANTIGEN 85-B FBPB (85B)               | 1,964679335   |
| WNQAL EDLVRAYQSM  | CAA16104.1; SECRETED ESAT-6 LIKE PROTEIN ESXR              | 1,8281652     |
| GELDN RGSQFY LAMY | PROBABLE ISOCITRATE DEHYDROGENASE CAA16247                 | 1,750472915   |
| LTAANTKKVAMAAPM   | POSSIBLE GLYCOSYL TRANSFERASE CAB05419                     | 1,708539359   |
| AFDLDRLLFKRNICH   | POSSIBLE GLYCOSYL TRANSFERASE CAB05419                     | 1,671740675   |
| RFGEMECWAMQAYGA   | RNA POLYMERASE BETA-SUBUNIT AAA21416                       | 1,66637506    |
| AVQRSFNRTL LSLMD  | PPE FAMILY PROTEIN CAE55489                                | 1,606072581   |
| SLGWDLCRIFTDGDY   | POSSIBLE GLYCOSYL TRANSFERASE CAB05418                     | 1,588060524   |
| LKMCWPAAPRSVGV P  | POSSIBLE HEMOLYSIN-LIKE PROTEIN CAA17201                   | 1,540856346   |
| QDWQAQWNQAMEALA   | CAA16102.1; ESAT-6 LIKE PROTEIN ESXQ                       | 1,51236425    |
| RSLHWLRPITPTFRP   | PUTATIVE CYCLOPROPANE-FATTY-ACYL-PHOSPHOLIPID              | 1,505408928   |

| Peptides         | Protein                                                                      | Average Index |
|------------------|------------------------------------------------------------------------------|---------------|
|                  | SYNTHASE UFAA1 NP_854118                                                     |               |
| AQYMREHDIGALPIC  | HYPOTHETICAL PROTEIN RV2626C NP_217142                                       | 1,480169913   |
| TRLMRLEDEMKEGRY  | CAA17245.1; HEAT SHOCK PROTEIN HSPX                                          | 1,468845376   |
| GGGGMGMPMGAAHQG  | MTB48 AAK31576                                                               | 1,453001213   |
| EGGYVWACKNYDGDV  | CAA17111.1; PROBABLE ISOCITRATE DEHYDROGENASE                                | 1,4405722     |
| VMPVGGQSSFYSDWY  | CAB10044.1; SECRETED ANTIGEN 85-B FBPB (85B)                                 | 1,43745771    |
| QTYSQQFDWRYPPSP  | CAA17582.1; PROBABLE SERINE PROTEASE PEPD                                    | 1,433031983   |
| FSNGVLWRGDYGLW   | YP_177963; PPE FAMILY PROTEIN                                                | 1,430193096   |
| YPYVVLIDLEMRP    | CONSERVED HYPOTHETICAL PROTEIN CAB08634                                      | 1,403330528   |
| KGLEKIPLLGHLWSW  | CAB06237.1; CONSERVED HYPOTHETICAL PROTEIN                                   | 1,376440711   |
| LKWEGGYVWACKNYD  | CAA17111.1; PROBABLE ISOCITRATE DEHYDROGENASE                                | 1,375228971   |
| GLRGLLRVISSEHPM  | MYCOBACTERIUM BOVIS MYCOCEROSIC ACID SYNTHASE GENE; M95808                   | 1,362188474   |
| SEWPGIDWPATQSMA  | HYPOTHETICAL PROTEIN RV2623 NP_217139                                        | 1,299074225   |
| YYLDLALMSVTQPDR  | MYCOBACTERIUM BOVIS MYCOCEROSIC ACID SYNTHASE GENE; M95808                   | 1,272307009   |
| QQIPKLVANNTLRWV  | CAB10044.1; SECRETED ANTIGEN 85-B FBPB (85B)                                 | 1,265963324   |
| VVSKPAALVHGMFVA  | CAE55335.1; PE FAMILY PROTEIN                                                | 1,248651058   |
| LRPASCRFVPTCSQY  | POSSIBLE HEMOLYSIN CAA16235                                                  | 1,213761468   |
| TKNTILKAYDGMFKD  | CAA17111.1; PROBABLE ISOCITRATE DEHYDROGENASE                                | 1,206367428   |
| TTFGYHEFFHACTAV  | POSSIBLE HEMOLYSIN-LIKE PROTEIN CAA17201                                     | 1,186669796   |
| WQGDTGITYQGWQTQ  | CAA16104.1; SECRETED ESAT-6 LIKE PROTEIN ESXR                                | 1,171808961   |
| YCGKYKRVRFKGIIC  | RNA POLYMERASE BETA'-SUBUNIT AAA21417                                        | 1,171792063   |
| MANNHMSMTNSGVSM  | CAE55371.1; PPE FAMILY PROTEIN                                               | 1,16782544    |
| FYLAMYWAQELAAQT  | PROBABLE ISOCITRATE DEHYDROGENASE CAA16247                                   | 1,098541134   |
| HQAIVRDVLAAAGDFW | PUTATIVE ESAT-6 LIKE PROTEIN ESXN YP_177838                                  | 1,081287603   |
| MAQQAAEEYGSHDKTF | PROBABLE ISOCITRATE DEHYDROGENASE CAA16247                                   | 1,069689239   |
| YRLERPLLALQCMF   | POSSIBLE GLYCOSYL TRANSFERASE CAB05415                                       | 1,028215409   |
| MSKKALCDFYEEQMQ  | PROBABLE ISOCITRATE DEHYDROGENASE CAA16247                                   | 1,015397967   |
| GMAKNPAERFMSAGD  | TRANSMEMBRANE SERINE/THREONINE-PROTEIN KINASE D PKND NP_215446               | 1,010234531   |
| NMREYLAAGAKERQR  | MTB48 AAK31576                                                               | 1,000968051   |
| VPSVTIPALTAARAV  | YP_177963; PPE FAMILY PROTEIN                                                | 0,988313348   |
| PIAVPSVTIPALTAA  | YP_177963; PPE FAMILY PROTEIN                                                | 0,983977029   |
| PNSALVSWLPFYHDM  | MYCOBACTERIUM BOVIS ACYL-COA SYNTHASE GENE; U75685                           | 0,970511955   |
| SGNFNSGILWRGNFE  | YP_177963; PPE FAMILY PROTEIN                                                | 0,956473172   |
| RMKRFARSNHGTCAN  | RNA POLYMERASE BETA'-SUBUNIT AAA21416                                        | 0,949330455   |
| INRYTLKPEKDGLFC  | RNA POLYMERASE BETA'-SUBUNIT AAA21417                                        | 0,89783364    |
| WQGDTGITYQAWQAQ  | CAA17363.1; LOW MOLECULAR WEIGHT PROTEIN ANTIGEN 7 ESXH                      | 0,864149273   |
| GGVHTANATVYIMDT  | CAA98350.1; CELL SURFACE LIPOPROTEIN MPT83                                   | 0,86062945    |
| QSAWQGDTGITYQAW  | CAA17363.1; LOW MOLECULAR WEIGHT PROTEIN ANTIGEN 7 ESXH                      | 0,853230392   |
| SRTGSIYIVKPKMHG  | MTB81                                                                        | 0,851057246   |
| SGSSSGFKVRPSFSF  | YP_177963; PPE FAMILY PROTEIN                                                | 0,845312037   |
| VVLGMYNFKESIRDF  | CAA17111.1; PROBABLE ISOCITRATE DEHYDROGENASE                                | 0,838356034   |
| DTGITYQAWQAQWNQ  | CAA17363.1; LOW MOLECULAR WEIGHT PROTEIN ANTIGEN 7 ESXH                      | 0,837086074   |
| GGQRFGECECWAMQA  | RNA POLYMERASE BETA'-SUBUNIT AAA21416                                        | 0,832210895   |
| EPVARRQRILFVGEA  | POSSIBLE GLYCOSYL TRANSFERASE CAB05418                                       | 0,822173608   |
| AFISGNFSNGVLWRG  | YP_177963; PPE FAMILY PROTEIN                                                | 0,794657787   |
| PEFSELFAAFPSFAG  | CAA17245.1; HEAT SHOCK PROTEIN HSPX                                          | 0,781468818   |
| RQRVAAAGFGHRVEI  | PUTATIVE CYCLOPROPANE-FATTY-ACYL-PHOSPHOLIPID SYNTHASE UFAA1 NP_854118       | 0,780106244   |
| AVLDPPDHGMVRQVR  | MYCOBACTERIUM BOVIS MYCOCEROSIC ACID SYNTHASE GENE; M95808                   | 0,772117409   |
| VTIPALTAARAVLDM  | YP_177963; PPE FAMILY PROTEIN                                                | 0,753253794   |
| FTLPGRSLMFVRNVG  | MTB81 (publication)                                                          | 0,747045608   |
| TEGLDIQIMSQVRSM  | PROBABLE ISOCITRATE DEHYDROGENASE CAA16247                                   | 0,742036585   |
| NGQFFVEMRMIDGTS  | TRANSMEMBRANE SERINE/THREONINE-PROTEIN KINASE D PKND NP_215446               | 0,7379895     |
| PWDGRNHYLAAVYRT  | CAA16030.1; PROBABLE MOLYBDOPTERIN-GUANINE DINUCLEOTIDE BIOSYNTHESIS PROTEIN | 0,7306786     |
| LSDYPYVVLIDLEM   | CONSERVED HYPOTHETICAL PROTEIN CAB08634                                      | 0,729554033   |
| ITYDTLWQADTDLPL  | CAA98382.1; IMMUNOGENIC PROTEIN MPT64                                        | 0,726597459   |
| SSAWQGDTGITYQGW  | CAA16104.1; SECRETED ESAT-6 LIKE PROTEIN ESXR                                | 0,724510446   |
| FARMWELYLAYSEAG  | PUTATIVE CYCLOPROPANE-FATTY-ACYL-PHOSPHOLIPID SYNTHASE UFAA1 NP_854118       | 0,711716681   |

| Peptides         | Protein                                                                | Average Index |
|------------------|------------------------------------------------------------------------|---------------|
| MIDGTSRLALLKQYG  | TRANSMEMBRANE SERINE/THREONINE-PROTEIN KINASE D PKND NP_215446         | 0,711622953   |
| SPAMVAANRTRLASL  | PPE FAMILY PROTEIN CAE55504                                            | 0,704835942   |
| KYKRVRFKGIICERC  | RNA POLYMERASE BETA'-SUBUNIT AAA21417                                  | 0,6861387     |
| QAYRKPIYDTLWQA   | CAA98382.1; IMMUNOGENIC PROTEIN MPT64                                  | 0,669819446   |
| FGTSQSATIATFEMR  | PPE FAMILY PROTEIN CAE55504                                            | 0,639239593   |
| MVQTKRYAGLTAANT  | POSSIBLE GLYCOSYL TRANSFERASE CAB05419                                 | 0,633077817   |
| PPSLVAANRSLMSL   | PPE FAMILY PROTEIN CAE55334                                            | 0,612606852   |
| VIGMGCRLPGGINSP  | MYCOBACTERIUM BOVIS MYCOCEROSIC ACID SYNTHASE GENE; M95808             | 0,595728291   |
| AGAGTGPPTPGAARW  | TRANSMEMBRANE SERINE/THREONINE-PROTEIN KINASE D PKND NP_215446         | 0,595358349   |
| FGGGTAIPISVGPIT  | YP_177963; PPE FAMILY PROTEIN                                          | 0,59274134    |
| AAMYQGTIKTWDDPQ  | PERIPLASMIC PHOSPHATE-BINDING LIOPROTEIN PSTS1 YP_177770               | 0,592656519   |
| QRVAVRVSQLHAGPR  | CONSERVED HYPOTHETICAL PROTEIN CAB08634                                | 0,584962702   |
| ECKDKDMTYAAPLFV  | RNA POLYMERASE BETA'-SUBUNIT AAA21416                                  | 0,581746056   |
| NGMSRDMASTFTIVA  | CAB10947.1; PROBABLE LIOPROTEIN LPRJ                                   | 0,580865314   |
| RIHTRYSSAYELEGA  | SECRETED L-ALANINE DEHYDROGENASE ALD CAA15575                          | 0,5762114642  |
| EGKQSLTKLAAWGG   | CAE55648                                                               | 0,569384157   |
| AFAAPAAQANPVDDAF | CONSERVED HYPOTHETICAL PROTEIN CAA15739                                | 0,567080825   |
| AATIKRFADRFAFNF  | MYCOBACTERIUM BOVIS ACYL-COA SYNTHASE GENE; U75685                     | 0,56130746    |
| VYVTSEGMYGRVVKL  | TRANSMEMBRANE SERINE/THREONINE-PROTEIN KINASE D PKND NP_215446         | 0,535838967   |
| LLEQAAAVEEASDTA  | CAE55371.1; PPE FAMILY PROTEIN                                         | 0,534029413   |
| AIAELRHLNPLNIVN  | YP_177963; PPE FAMILY PROTEIN                                          | 0,533275689   |
| GMWMTMELMADMVET  | MTB81 (publication)                                                    | 0,507311465   |
| ERCGVEVTRAKVRRE  | RNA POLYMERASE BETA'-SUBUNIT AAA21417                                  | 0,503148776   |
| GGATSLISYMLPRSP  | MYCOBACTERIUM BOVIS ACYL-COA SYNTHASE GENE; U75685                     | 0,502526455   |
| EYELMWAADVAAMAG  | YP_177963; PPE FAMILY PROTEIN                                          | 0,50059474    |
| WCAHSGWKVDAAGV   | RNA POLYMERASE BETA'-SUBUNIT AAA21416                                  | 0,496960479   |
| TELAQAQRKIDRLL   | PUTATIVE CYCLOPROPANE-FATTY-ACYL-PHOSPHOLIPID SYNTHASE UFAA1 NP_854118 | 0,49503797    |
| DDLAAALADIAPMTP  | MYCOBACTERIUM BOVIS MYCOCEROSIC ACID SYNTHASE GENE; M95808             | 0,494057505   |
| EYLAAGAKERQRLAT  | MTB48 AAK31576                                                         | 0,487664725   |
| AYETAYGLTVPPPVI  | CAE55371.1; PPE FAMILY PROTEIN                                         | 0,48236027    |
| GLAARRRRILFVAEA  | POSSIBLE GLYCOSYL TRANSFERASE CAB05415                                 | 0,482250977   |
| GSWLTMIRLAKCGPW  | POSSIBLE HEMOLYSIN CAA16235                                            | 0,481869898   |
| MASTFTIVAIGTYCP  | CAB10947.1; PROBABLE LIOPROTEIN LPRJ                                   | 0,480224657   |
| RLARQRVAAAGFGHR  | PUTATIVE CYCLOPROPANE-FATTY-ACYL-PHOSPHOLIPID SYNTHASE UFAA1 NP_854118 | 0,473056479   |
| RRERMGHIELAAPVT  | RNA POLYMERASE BETA'-SUBUNIT AAA21417                                  | 0,472974122   |
| GLSSLGWDLCRIFTD  | POSSIBLE GLYCOSYL TRANSFERASE CAB05418                                 | 0,472443167   |
| LLPDAQSIQAAAAGF  | PERIPLASMIC PHOSPHATE-BINDING LIOPROTEIN PSTS1 YP_177770               | 0,464600604   |
| EAVPIAGFAQMRIVM  | 3-OXOACYL-[ACYL-CARRIER PROTEIN] SYNTHASE 2 KASB CAA94642              | 0,464399457   |
| LPGLPSLPDIIDLW   | CAB06237.1; CONSERVED HYPOTHETICAL PROTEIN                             | 0,461585425   |
| CGKAGCQTYKWETFL  | CAB10044.1; SECRETED ANTIGEN 85-B FBPB (85B)                           | 0,460006499   |
| DRMFLAEKTVKNYVS  | TWO COMPONENT TRANSCRIPTIONAL REGULATORY PROTEIN DEVR NP_217649        | 0,451972015   |
| AQDAVMYSYEGASA   | PPE FAMILY PROTEIN CAE55334                                            | 0,445702162   |
| IIDGLWPPKLPDIPI  | CAB06237.1; CONSERVED HYPOTHETICAL PROTEIN                             | 0,435440298   |
| RVICRRSKLMTRIAG  | MYCOBACTERIUM BOVIS MYCOCEROSIC ACID SYNTHASE GENE; M95808             | 0,419623385   |
| GTGPPTPGAARWSPG  | TRANSMEMBRANE SERINE/THREONINE-PROTEIN KINASE D PKND NP_215446         | 0,41092685    |
| ETGSTLLYPLFNLWG  | PERIPLASMIC PHOSPHATE-BINDING LIOPROTEIN PSTS1 YP_177770               | 0,40093857    |
| KNPAERFMSAGDLAI  | TRANSMEMBRANE SERINE/THREONINE-PROTEIN KINASE D PKND NP_215446         | 0,390432193   |
| GSGQTYGVDDVVGYDR | CAB09453.1; PROBABLE SERINE PROTEASE PEPA                              | 0,38495356    |
| SQYAVDALTEYGLLR  | POSSIBLE HEMOLYSIN CAA16235                                            | 0,383266246   |
| DPDSFWAGVDKVVAD  | MTB81 (publication)                                                    | 0,361767223   |

| Peptides         | Protein                                                                         | Average Index |
|------------------|---------------------------------------------------------------------------------|---------------|
| AAAAAYETAYGLTVPP | CAE55371.1; PPE FAMILY PROTEIN                                                  | 0,357891451   |
| SAIQGNVTSIHSLLD  | CAE55648                                                                        | 0,352664166   |
| VYADAAPDLDFDLDS  | MCE-FAMILY PROTEIN MCE1AYP_177701                                               | 0,350836735   |
| TAASNNPMLSTLTSA  | CAA98350.1; CELL SURFACE LIPOPROTEIN MPT83                                      | 0,344527157   |
| SEFDVILEAAGDKKI  | CAB07109.1; PROBABLE 50S RIBOSOMAL PROTEIN L7/L12 RPLL                          | 0,343812792   |
| TATAGELARDSIYYV  | HYPOTHETICAL PROTEIN RV2626C NP_217142                                          | 0,342053367   |
| IKRFADRFARFNLQE  | MYCOBACTERIUM BOVIS ACYL-COA SYNTHASE GENE; U75685                              | 0,332854806   |
| LDEEEIWDLTSAEFT  | CONSERVED HYPOTHETICAL PROTEIN CAB08634                                         | 0,331245012   |
| GKAFFYVVVTGIAMT  | 3-OXOACYL-[ACYL-CARRIER PROTEIN] SYNTHASE 2 KASB<br>CAA94642                    | 0,323320449   |
| ELTMTDTVGQVVLGW  | CAB06500.1; IMMUNOGENIC PROTEIN MPT63                                           | 0,322988589   |
| PPTPGAARWSPGDSA  | TRANSMEMBRANE SERINE/THREONINE-PROTEIN KINASE D PKND<br>NP_215446               | 0,315088634   |
| KEFFGTSQLSQFMD   | RNA POLYMERASE BETA-SUBUNIT AAA21416                                            | 0,314683832   |
| MAKVNIKPLEDKILV  | CAB01005.1; 10 KDA CHAPERONIN GROES                                             | 0,310450721   |
| IAAAKPLGSPPPK    | CAA17582.1; PROBABLE SERINE PROTEASE PEPD                                       | 0,309443137   |
| HGMFVALPAATADAY  | CAE55335.1; PE FAMILY PROTEIN                                                   | 0,302314498   |
| MMGNAFLTALTNAGI  | CAB10947.1; PROBABLE LIPOPROTEIN LPRJ                                           | 0,30172851    |
| NGIELCRDLLSRMPD  | TWO COMPONENT TRANSCRIPTIONAL REGULATORY PROTEIN<br>DEVR NP_217649              | 0,301209095   |
| APAIAAAEAEYEQIW  | PPE FAMILY PROTEIN CAE55504                                                     | 0,298781285   |
| RRSGSSRAPTESTRR  | MYCOBACTERIUM BOVIS MYCOCEROSIC ACID SYNTHASE GENE;<br>M95808                   | 0,293576286   |
| SGVTPGTGMPAAPMV  | MTB48 AAK31576                                                                  | 0,290134627   |
| QHTTEEAIRMNCRAV  | CONSERVED HYPOTHETICAL PROTEIN CAB08634                                         | 0,283404228   |
| QVVAALNATDPGAAA  | LOW MOLECULAR WEIGHT T-CELL ANTIGEN TB8.4 NP_215690                             | 0,275613704   |
| NHVIAGATDINAFSV  | CAB09453.1; PROBABLE SERINE PROTEASE PEPA                                       | 0,273918174   |
| ENYIAQTRDKFLSAA  | CAA98382.1; IMMUNOGENIC PROTEIN MPT64                                           | 0,271710266   |
| IAGATDINAFSVGSG  | CAB09453.1; PROBABLE SERINE PROTEASE PEPA                                       | 0,265587341   |
| AGAATEVELKERKHR  | 60 kDa chaperonin 2 P0A521                                                      | 0,2637488     |
| VEAEYELMWAADVAA  | YP_177963; PPE FAMILY PROTEIN                                                   | 0,262071031   |
| PGYPVAGQVWEATAT  | CAB06500.1; IMMUNOGENIC PROTEIN MPT63                                           | 0,251914991   |
| KMSALVDASDALRIV  | CAA16030.1; PROBABLE MOLYBDOPTERIN-GUANINE<br>DINUCLEOTIDE BIOSYNTHESIS PROTEIN | 0,251593228   |
| LYTEDRAWTEAVIGN  | MTB48 AAK31576                                                                  | 0,238518101   |
| AFAMTVPPSLVAANR  | PPE FAMILY PROTEIN CAE55334                                                     | 0,234180297   |
| VAASAQGMLSSTGRC  | MYCOBACTERIUM BOVIS MYCOCEROSIC ACID SYNTHASE GENE;<br>M95808                   | 0,232518259   |
| TTLALVSAPAGGAAA  | PROBABLE CUTINASE PRECURSOR CFP21 NP_216500                                     | 0,231089257   |
| VIKAGAAATEVELKER | 60 kDa chaperonin 2 P0A521                                                      | 0,227026684   |
| GQMLGGLPVGQMGAR  | CAE55371.1; PPE FAMILY PROTEIN                                                  | 0,226301828   |
| WDLCRIFTDGDYTLV  | POSSIBLE GLYCOSYL TRANSFERASE CAB05418                                          | 0,225658628   |
| GNNMAQTDSAVGSSW  | PUTATIVE ESAT-6 LIKE PROTEIN ESXN YP_177838                                     | 0,223051183   |
| VDSAGNVVYTSEGMV  | TRANSMEMBRANE SERINE/THREONINE-PROTEIN KINASE D PKND<br>NP_215446               | 0,221641764   |
| DFTPAAEIVKDGDDA  | CAA17343.1; HEAT SHOCK PROTEIN HSP                                              | 0,22128926    |
| AAAAGFASKTPANQA  | PERIPLASMIC PHOSPHATE-BINDING LIPOPROTEIN PSTS1<br>YP_177770                    | 0,220408085   |
| TQTGTAVGTYNMAP   | TRANSMEMBRANE SERINE/THREONINE-PROTEIN KINASE D PKND<br>NP_215446               | 0,217518017   |
| TDAKLLSSILTYHVI  | CAA98350.1; CELL SURFACE LIPOPROTEIN MPT83                                      | 0,217074823   |
| STGMSGGFVTAPTQG  | YP_177963; PPE FAMILY PROTEIN                                                   | 0,216550228   |
| RFVPTCSQYAVDALT  | POSSIBLE HEMOLYSIN CAA16235                                                     | 0,212820518   |
| GLFSYSYSLDVPRIT  | YP_177963; PPE FAMILY PROTEIN                                                   | 0,209620102   |
| KEDEYPSTAYLQYTS  | MYCOBACTERIUM BOVIS ACYL-COA SYNTHASE GENE; U75685                              | 0,208506266   |
| YGRRLRHGQILFTFLH | SECRETED L-ALANINE DEHYDROGENASE ALD CAA15575                                   | 0,20539649    |
| AGCQTYKWETFLTSE  | CAB10044.1; SECRETED ANTIGEN 85-B FBPB (85B)                                    | 0,201704797   |
| AALQSAWQGDGTGY   | CAA17363.1; LOW MOLECULAR WEIGHT PROTEIN ANTIGEN 7 ESXH                         | 0,198940985   |
| QAVPGAAQYIGLVES  | LOW MOLECULAR WEIGHT T-CELL ANTIGEN TB8.4 NP_215690                             | 0,198803055   |
| ENPSARDQILPVYAE  | MTB48 AAK31576                                                                  | 0,193151716   |
| AAGAKERQRLATSLR  | MTB48 AAK31576                                                                  | 0,193050363   |
| VVLPTDITAPWGIA   | TRANSMEMBRANE SERINE/THREONINE-PROTEIN KINASE D PKND<br>NP_215446               | 0,192738109   |
| NYEGLFSYSYSLDVP  | YP_177963; PPE FAMILY PROTEIN                                                   | 0,19230008    |
| RRTQAAVFATELKRS  | TWO COMPONENT TRANSCRIPTIONAL REGULATORY PROTEIN                                | 0,190063453   |

| Peptides         | Protein                                                                      | Average Index |
|------------------|------------------------------------------------------------------------------|---------------|
|                  | DEVR NP_217649                                                               |               |
| LDAPNGYTFKEDEYP  | MYCOBACTERIUM BOVIS ACYL-COA SYNTHASE GENE; U75685                           | 0,182877614   |
| RTLKPEKDLGFCEKI  | RNA POLYMERASE BETA'-SUBUNIT AAA21417                                        | 0,180402548   |
| WTSSGAIGPTWYSVG  | YP_177963; PPE FAMILY PROTEIN                                                | 0,175840254   |
| ETIQEITRGRCAAIS  | MYCOBACTERIUM BOVIS ACYL-COA SYNTHASE GENE; U75685                           | 0,175378538   |
| KTQTVLPFTGLNDPD  | TRANSMEMBRANE SERINE/THREONINE-PROTEIN KINASE D PKND NP_215446               | 0,172994436   |
| DTPRVATAGEPNFMD  | MTB48 AAK31576                                                               | 0,172414333   |
| LVDADGKAMLFDGSR  | RNA POLYMERASE BETA'-SUBUNIT AAA21416                                        | 0,171218907   |
| GAAFGGLTTAHTPRR  | MYCOBACTERIUM BOVIS MYCOCEROSIC ACID SYNTHASE GENE; M95808                   | 0,168453397   |
| EDMPFLADGTPVDII  | RNA POLYMERASE BETA'-SUBUNIT AAA21416                                        | 0,166228421   |
| RPSFSFFAVGPDGMP  | YP_177963; PPE FAMILY PROTEIN                                                | 0,16567856    |
| YRQYQAGKPTSTNPI  | CAA17111.1; PROBABLE ISOCITRATE DEHYDROGENASE                                | 0,160089961   |
| SARDQILPVYAEYQQ  | MTB48 AAK31576                                                               | 0,159044559   |
| VNADIKATTVFGGKY  | MCE-FAMILY PROTEIN MCE1AYP_177701                                            | 0,155823513   |
| AYVITSVDEEMRHNE  | RNA POLYMERASE BETA'-SUBUNIT AAA21417                                        | 0,155327059   |
| DQEYDDFWDEDEGEVM | PPE FAMILY PROTEIN CAE55489                                                  | 0,155321      |
| WQADTDPLPVVFPIV  | CAA98382.1; IMMUNOGENIC PROTEIN MPT64                                        | 0,148995939   |
| VAAMFGYHSAASAVA  | PPE FAMILY PROTEIN CAE55504                                                  | 0,148315995   |
| SIQAAAAGFASKTPA  | PERIPLASMIC PHOSPHATE-BINDING LIPOPROTEIN PSTS1 YP_177770                    | 0,147378265   |
| TLGLHGPAMTFDTAC  | MYCOBACTERIUM BOVIS MYCOCEROSIC ACID SYNTHASE GENE; M95808                   | 0,140466519   |
| DVTVSRRAHEFRLEN  | CAB01474.1; CONSERVED HYPOTHETICAL PROTEIN CFP17                             | 0,136731381   |
| TVFMGDFPMMTEKGT  | RNA POLYMERASE BETA'-SUBUNIT AAA21416                                        | 0,135808968   |
| SSGFKVRPSFSFFAV  | YP_177963; PPE FAMILY PROTEIN                                                | 0,131811491   |
| ISYMLPRSPIVRIVD  | MYCOBACTERIUM BOVIS ACYL-COA SYNTHASE GENE; U75685                           | 0,128363526   |
| TPGTGMPAAPMVPTT  | MTB48 AAK31576                                                               | 0,128048634   |
| AAGLTYEHLIDDMV   | CAA17111.1; PROBABLE ISOCITRATE DEHYDROGENASE                                | 0,123497887   |
| PDLDFDLSSVTTAR   | MCE-FAMILY PROTEIN MCE1AYP_177701                                            | 0,119279282   |
| LILTSYTSDEAMLDA  | TWO COMPONENT TRANSCRIPTIONAL REGULATORY PROTEIN DEVR NP_217649              | 0,117752886   |
| VGGRSIGVYAVNYPA  | PROBABLE CUTINASE PRECURSOR CFP21 NP_216500                                  | 0,117377013   |
| TFLTSELPQWLSANR  | CAB10044.1; SECRETED ANTIGEN 85-B FBPB (85B)                                 | 0,114567921   |
| GVEVTRAKVRRERMG  | RNA POLYMERASE BETA'-SUBUNIT AAA21417                                        | 0,113644372   |
| EGLPPGSALLVVKRG  | CAB01474.1; CONSERVED HYPOTHETICAL PROTEIN CFP17                             | 0,110945275   |
| FKEMTLLELSDFVKK  | CAB07109.1; PROBABLE 50S RIBOSOMAL PROTEIN L7/L12 RPLL                       | 0,110724075   |
| DIASEQAVLSSAWQG  | CAA16104.1; SECRETED ESAT-6 LIKE PROTEIN ESXR                                | 0,110561279   |
| FAAVDHTGADVVKLYQ | CONSERVED HYPOTHETICAL PROTEIN CAB08634                                      | 0,106267478   |
| TSVFRADFLSELDAP  | CAB01474.1; CONSERVED HYPOTHETICAL PROTEIN CFP17                             | 0,104161343   |
| PGTNWIGQAAEAYLN  | CAB06237.1; CONSERVED HYPOTHETICAL PROTEIN                                   | 0,10231926    |
| NNQVVLPTDITAPW   | TRANSMEMBRANE SERINE/THREONINE-PROTEIN KINASE D PKND NP_215446               | 0,101549487   |
| AGKRRATIEQLLTIP  | MTB81 (publication)                                                          | 0,101059926   |
| VAVTPEQRPLYRRDG  | MYCOBACTERIUM BOVIS MYCOCEROSIC ACID SYNTHASE GENE; M95808                   | 0,098910474   |
| TFTIVAIGTYCPAVI  | CAB10947.1; PROBABLE LIPOPROTEIN LPRJ                                        | 0,098761361   |
| SQFGPYQLRLRLGRG  | TRANSMEMBRANE SERINE/THREONINE-PROTEIN KINASE D PKND NP_215446               | 0,095039253   |
| TWDDPQIAALNPGVN  | PERIPLASMIC PHOSPHATE-BINDING LIPOPROTEIN PSTS1 YP_177770                    | 0,091014436   |
| ATDINAFSVGSGQTY  | CAB09453.1; PROBABLE SERINE PROTEASE PEPA                                    | 0,089123793   |
| RSCPGYTLDYNANGS  | PERIPLASMIC PHOSPHATE-BINDING LIPOPROTEIN PSTS2 YP_177769                    | 0,089021303   |
| DVVVLLESMEIPV    | CAB08316.1; BIOTINYLATED PROTEIN TB7.3                                       | 0,085806525   |
| KVIATNKARALAQY   | MYCOBACTERIUM BOVIS MYCOCEROSIC ACID SYNTHASE GENE; M95808                   | 0,08201149    |
| YQAGKPTSTNPIASI  | CAA17111.1; PROBABLE ISOCITRATE DEHYDROGENASE                                | 0,079379647   |
| RRAVQTDAEVVLPWD  | CAA16030.1; PROBABLE MOLYBDOPTERIN-GUANINE DINUCLEOTIDE BIOSYNTHESIS PROTEIN | 0,078087847   |
| SNVPRLVPGWTKPIV  | CAA17111.1; PROBABLE ISOCITRATE DEHYDROGENASE                                | 0,071191478   |
| VALFGEPSSGFSSML  | PROBABLE CUTINASE PRECURSOR CFP21 NP_216500                                  | 0,071086281   |
| IYEQANAHGQKVQAA  | PUTATIVE ESAT-6 LIKE PROTEIN ESXN YP_177838                                  | 0,068735617   |
| SYDAGVLTVRVAGAY  | CAA17343.1; HEAT SHOCK PROTEIN HSP                                           | 0,066132977   |

| Peptides         | Protein                                                                      | Average Index |
|------------------|------------------------------------------------------------------------------|---------------|
| PLTPARAVAIVRQIA  | TRANSMEMBRANE SERINE/THREONINE-PROTEIN KINASE D PKND NP_215446               | 0,051326161   |
| VANMPASVPKTSTYA  | SECRETED L-ALANINE DEHYDROGENASE ALD CAA15575                                | 0,050796812   |
| VPDSSVPIIIVPPTP  | YP_177963; PPE FAMILY PROTEIN                                                | 0,050313308   |
| VQTDAEVVLPWDGRN  | CAA16030.1; PROBABLE MOLYBDOPTERIN-GUANINE DINUCLEOTIDE BIOSYNTHESIS PROTEIN | 0,049032747   |
| YGEVKKPETINYRTL  | RNA POLYMERASE BETA'-SUBUNIT AAA21417                                        | 0,047429912   |
| FFPFTGLNSLTVDVS  | PPE FAMILY PROTEIN CAE55504                                                  | 0,046854498   |
| LIKAILSLRHGVVPP  | MYCOBACTERIUM BOVIS MYCOCEROSIC ACID SYNTHASE GENE; M95808                   | 0,045866773   |
| GPKGRNVVLEKKWGA  | 60 kDa chaperonin 2 P0A521                                                   | 0,045855679   |
| SLPAHLRPLGDELSEF | PPE FAMILY PROTEIN CAE55504                                                  | 0,044248467   |
| ELAVDLAVPMIGMLK  | CONSERVED HYPOTHETICAL PROTEIN TB16.3CAD97060                                | 0,044083554   |
| DYEGWLWLSGGSTIP  | YP_177963; PPE FAMILY PROTEIN                                                | 0,043690161   |
| LPDFLGGFAGLPSLG  | CAB06237.1; CONSERVED HYPOTHETICAL PROTEIN                                   | 0,038123923   |
| INSVLMYSGAGSSPL  | YP_177963; PPE FAMILY PROTEIN                                                | 0,033661654   |
| LFCTIRNFYDADPLA  | MCE-FAMILY PROTEIN MCE1AYP_177701                                            | 0,032342608   |
| IQQLAALGDVYADAA  | MCE-FAMILY PROTEIN MCE1AYP_177701                                            | 0,030311271   |
| EAPLKQIAFNSGLEP  | 60 kDa chaperonin 2 P0A521                                                   | 0,029146264   |
| VLLKRLPDALRDGNR  | MYCOBACTERIUM BOVIS MYCOCEROSIC ACID SYNTHASE GENE; M95808                   | 0,025868202   |
| DTLFYCVANMPASVP  | SECRETED L-ALANINE DEHYDROGENASE ALD CAA15575                                | 0,024919999   |
| LAENLKQRAEQLAAS  | CONSERVED HYPOTHETICAL PROTEIN TB18.5CAD93033                                | 0,024330846   |
| FQDAYNAAGGHNAVF  | CAB10044.1; SECRETED ANTIGEN 85-B FBPB (85B)                                 | 0,023933612   |
| LDEHGTVLLAVRGLR  | MYCOBACTERIUM BOVIS MYCOCEROSIC ACID SYNTHASE GENE; M95808                   | 0,023776005   |
| GFSEIMRSTLEKDN   | RNA POLYMERASE BETA-SUBUNIT AAA21416                                         | 0,023274973   |
| RITILDAHFTGAFGP  | YP_177963; PPE FAMILY PROTEIN                                                | 0,022796671   |
| FPEIPANADGELYVI  | YP_177963; PPE FAMILY PROTEIN                                                | 0,022483593   |
| PSQFFPFTGLNSLTY  | PPE FAMILY PROTEIN CAE55504                                                  | 0,021905379   |
| PGGTFSITSRMAEI   | CAB10947.1; PROBABLE LIPOPROTEIN LPRJ                                        | 0,020019992   |
| LVAAQMQWDSVASDL  | CAE55371.1; PPE FAMILY PROTEIN                                               | 0,017471774   |
| YDRTQDVAVLQLRGA  | CAB09453.1; PROBABLE SERINE PROTEASE PEPA                                    | 0,016914847   |
| QAAVFATELKRSRPP  | TWO COMPONENT TRANSCRIPTIONAL REGULATORY PROTEIN DEVR NP_217649              | 0,016854755   |
| AAQVAVRWAARDAEL  | HYPOTHETICAL PROTEIN RV2623 NP_217139                                        | 0,01399293    |
| LYLLLGWVAVWYTAT  | POSSIBLE HEMOLYSIN-LIKE PROTEIN CAA17201                                     | 0,013364597   |
| YELEGAVKRALDVIG  | SECRETED L-ALANINE DEHYDROGENASE ALD CAA15575                                | 0,012714761   |
| PHWGPFGGAAPVSAG  | PPE FAMILY PROTEIN CAE55334                                                  | 0,009721193   |
| VRERMTTQDVEAITP  | RNA POLYMERASE BETA-SUBUNIT AAA21416                                         | 0,008406688   |
| LPVYAEYQQRSEKVL  | MTB48 AAK31576                                                               | 0,005851981   |
| CSSTKPVSQDTSPKP  | CAA98350.1; CELL SURFACE LIPOPROTEIN MPT83                                   | 0,003327369   |
| CGGVSTANATVYIMID | CAA98373.1; MAJOR SECRETED IMMUNOGENIC PROTEIN                               | 0,00247953    |
| ELTAAQVRVAAAAYE  | CAE55371.1; PPE FAMILY PROTEIN                                               | 0,001467407   |
| GDLVGPGCAYEAAAN  | CAA98373.1; MAJOR SECRETED IMMUNOGENIC PROTEIN                               | 0,000943683   |
| FATELKRSRPPGDGP  | TWO COMPONENT TRANSCRIPTIONAL REGULATORY PROTEIN DEVR NP_217649              | -0,004231027  |
| MQRDGLAHLGFDEV   | PUTATIVE CYCLOPROPANE-FATTY-ACYL-PHOSPHOLIPID SYNTHASE UFAA1 NP_854118       | -0,005901913  |
| TPEQRPLYRRDGSYI  | MYCOBACTERIUM BOVIS MYCOCEROSIC ACID SYNTHASE GENE; M95808                   | -0,005997758  |
| GKSPGFGTTVDFAV   | PERIPLASMIC PHOSPHATE-BINDING LIPOPROTEIN PSTS1 YP_177770                    | -0,008749944  |
| ADLSLLGKARKVVVT  | 60 kDa chaperonin 2 P0A521                                                   | -0,009309334  |
| PQIQALNSGTDLPPT  | PERIPLASMIC PHOSPHATE-BINDING LIPOPROTEIN PSTS2 YP_177769                    | -0,010820714  |
| GNTTTPSSGFFNTG   | YP_177963; PPE FAMILY PROTEIN                                                | -0,013153174  |
| AAAGDLVGPGEAIEYA | CAA98373.1; MAJOR SECRETED IMMUNOGENIC PROTEIN                               | -0,014070845  |
| VVPLIDLEMRRPTYV  | CONSERVED HYPOTHETICAL PROTEIN CAB08634                                      | -0,015608476  |
| MFRELVLGSPAGSPEF | ALTERNATE RNA POLYMERASE SIGMA FACTOR SIGF CAB07069                          | -0,017821416  |
| PAADLIGRGCAQYAA  | CAA98350.1; CELL SURFACE LIPOPROTEIN MPT83                                   | -0,019440838  |
| FQVIYEQANAHHGQKV | PUTATIVE ESAT-6 LIKE PROTEIN ESXN YP_177838                                  | -0,019442092  |
| EEDVLTSIHIEEHEI  | RNA POLYMERASE BETA-SUBUNIT AAA21416                                         | -0,022214855  |
| DLSNDLFAAFLDETM  | PUTATIVE CYCLOPROPANE-FATTY-ACYL-PHOSPHOLIPID SYNTHASE UFAA1 NP_854118       | -0,023592002  |

| Peptides         | Protein                                                                | Average Index |
|------------------|------------------------------------------------------------------------|---------------|
| VTGCAETPGCVAYIG  | PERIPLASMIC PHOSPHATE-BINDING LIPOPROTEIN PSTS1 YP_177770              | -0,026531245  |
| ATIATFEMRYLQSLP  | PPE FAMILY PROTEIN CAE55504                                            | -0,029812475  |
| ILTVSVAVSEGKPT   | CAA17245.1; HEAT SHOCK PROTEIN HSPX                                    | -0,02995089   |
| DPIPLNFDVLSSAGP  | YP_177963; PPE FAMILY PROTEIN                                          | -0,030851211  |
| RMTSGSSSGFKVRPS  | YP_177963; PPE FAMILY PROTEIN                                          | -0,034464359  |
| EPIDVPAVLDIHET   | YP_177963; PPE FAMILY PROTEIN                                          | -0,034598722  |
| ASPVAQSYLRNFLAA  | LOW MOLECULAR WEIGHT T-CELL ANTIGEN TB8.4 NP_215690                    | -0,035832642  |
| EPSDLVYGDVIMRST  | POSSIBLE GLYCOSYL TRANSFERASE CAB05419                                 | -0,036822196  |
| EVTVETTSVFRADFL  | CAB01474.1; CONSERVED HYPOTHETICAL PROTEIN CFP17                       | -0,038745964  |
| GLAVDTQGAVYVADR  | TRANSMEMBRANE SERINE/THREONINE-PROTEIN KINASE D PKND NP_215446         | -0,040285395  |
| QRHRDKIVQRCLPLA  | ALTERNATE RNA POLYMERASE SIGMA FACTOR SIGF CAB07069                    | -0,041854845  |
| FLDDVTVSRRHAEFR  | CAB01474.1; CONSERVED HYPOTHETICAL PROTEIN CFP17                       | -0,041892878  |
| AKERQRLATSLRNAA  | MTB48 AAK31576                                                         | -0,044071686  |
| TVTTGIVSALNRPVS  | CAA17582.1; PROBABLE SERINE PROTEASE PEPD                              | -0,045205768  |
| LIVEPWMGPAAAMA   | PPE FAMILY PROTEIN CAE55334                                            | -0,045283687  |
| DAQSIQAAAAGFASK  | PERIPLASMIC PHOSPHATE-BINDING LIPOPROTEIN PSTS1 YP_177770              | -0,045295093  |
| VEQASVILRRITIDAD | MYCOBACTERIUM BOVIS MYCOCEROSIC ACID SYNTHASE GENE; M95808             | -0,045367602  |
| SARMYAGPGSASLVA  | CAE55371.1; PPE FAMILY PROTEIN                                         | -0,045482531  |
| YIGISFLDQASQRGL  | PERIPLASMIC PHOSPHATE-BINDING LIPOPROTEIN PSTS1 YP_177770              | -0,045622083  |
| IPANADGELYVIAGD  | YP_177963; PPE FAMILY PROTEIN                                          | -0,046545368  |
| ELAIPMSGIAMAVVG  | CAB06237.1; CONSERVED HYPOTHETICAL PROTEIN                             | -0,047850197  |
| TSYTSDEAMLDAILA  | TWO COMPONENT TRANSCRIPTIONAL REGULATORY PROTEIN DEVR NP_217649        | -0,048217872  |
| QNTMKIGIMDEERRT  | MTB81 (publication)                                                    | -0,048398898  |
| AMLARDGAEAAKWGG  | CAA16104.1; SECRETED ESAT-6 LIKE PROTEIN ESXR                          | -0,050528795  |
| GSFASVTTGLAGDAW  | PPE FAMILY PROTEIN CAE55504                                            | -0,050659567  |
| ANIPAEFLENFVRSS  | CAB10044.1; SECRETED ANTIGEN 85-B FBPB (85B)                           | -0,052448584  |
| QVALAATMEQTYGVR  | MYCOBACTERIUM BOVIS MYCOCEROSIC ACID SYNTHASE GENE; M95808             | -0,053977182  |
| AWGAWGEVGRATFLA  | MYCOBACTERIUM BOVIS MYCOCEROSIC ACID SYNTHASE GENE; M95808             | -0,054201565  |
| ILVQANEAEITTTASG | CAB01005.1; 10 KDA CHAPERONIN GROES                                    | -0,055922523  |
| VRPVSIYRLYRPLI   | POSSIBLE GLYCOSYL TRANSFERASE CAB05418                                 | -0,057132727  |
| AAMGAFTIPQIDIPA  | YP_177963; PPE FAMILY PROTEIN                                          | -0,05728475   |
| TRHTQTWIKYIFPG   | PUTATIVE CYCLOPROPANE-FATTY-ACYL-PHOSPHOLIPID SYNTHASE UFAA1 NP_854118 | -0,057352198  |
| AVVRVQGVSGLTPI   | CAA17582.1; PROBABLE SERINE PROTEASE PEPD                              | -0,057443827  |
| GGKAQFGGQRFGE    | RNA POLYMERASE BETA-SUBUNIT AAA21416                                   | -0,058227684  |
| GSVVSTLIVEPWMGP  | PPE FAMILY PROTEIN CAE55334                                            | -0,058274288  |
| DVDKDVNVELDPGQP  | CAA17343.1; HEAT SHOCK PROTEIN HSP                                     | -0,058778695  |
| LTEPHIVPIHDYGEI  | TRANSMEMBRANE SERINE/THREONINE-PROTEIN KINASE D PKND NP_215446         | -0,059645627  |
| IATVESGKMTKDLAI  | CAA17111.1; PROBABLE ISOCITRATE DEHYDROGENASE                          | -0,060327547  |
| YPEGLAVDTQGAIVYV | TRANSMEMBRANE SERINE/THREONINE-PROTEIN KINASE D PKND NP_215446         | -0,063677203  |
| EPGVPGRSVSRWGGF  | MYCOBACTERIUM BOVIS MYCOCEROSIC ACID SYNTHASE GENE; M95808             | -0,063918218  |
| PIPEGLTTGRSCQTD  | POSSIBLE HEMOLYSIN CAA16235                                            | -0,064740073  |
| SSRYGHWPPAVAVGC  | MYCOBACTERIUM BOVIS MYCOCEROSIC ACID SYNTHASE GENE; M95808             | -0,065053871  |
| RVSVGNLRIARVLYD  | MTB81 (publication)                                                    | -0,067364096  |
| TWKLILLDRQSGIRTL | 3-OXOACYL-[ACYL-CARRIER PROTEIN] SYNTHASE 2 KASB CAA94642              | -0,067840306  |
| FPQHVENALRLMPEN  | POSSIBLE GLYCOSYL TRANSFERASE CAB05415                                 | -0,068356056  |
| IEDAVRNAKAAVEEG  | 60 kDa chaperonin 2 P0A521                                             | -0,069138783  |
| MRPSKTFNAALEAVQ  | PROBABLE ISOCITRATE DEHYDROGENASE CAA16247                             | -0,069167901  |
| RRGLTFYYLDLALMS  | MYCOBACTERIUM BOVIS MYCOCEROSIC ACID SYNTHASE GENE; M95808             | -0,069360565  |
| DSIYYVDANASIQEM  | HYPOTHETICAL PROTEIN RV2626C NP_217142                                 | -0,069727511  |
| TCVGEHETLTAQAQY  | HYPOTHETICAL PROTEIN RV2626C NP_217142                                 | -0,069792544  |

| Peptides         | Protein                                                        | Average Index |
|------------------|----------------------------------------------------------------|---------------|
| NPPKPPPAIKIDPPP  | MTB48 AAK31576                                                 | -0,070777858  |
| AERFMSAGDLAIAAH  | TRANSMEMBRANE SERINE/THREONINE-PROTEIN KINASE D PKND NP_215446 | -0,072361233  |
| EADLRVLDEIAPDLV  | POSSIBLE GLYCOSYL TRANSFERASE CAB05415                         | -0,072634562  |
| TGMELRAAIDAATSS  | RNA POLYMERASE BETA-SUBUNIT AAA21416                           | -0,072983254  |
| GRAGGGAALGGGGMG  | MTB48 AAK31576                                                 | -0,073933201  |
| HESNTMAMLARDGAE  | CAA16104.1; SECRETED ESAT-6 LIKE PROTEIN ESXR                  | -0,074016454  |
| RQAVPLVRSEAPLVG  | RNA POLYMERASE BETA-SUBUNIT AAA21416                           | -0,074873616  |
| DISVAARILAEFPDY  | PROBABLE ISOCITRATE DEHYDROGENASE CAA16247                     | -0,078294731  |
| ARDADMLSELGEPVD  | CONSERVED HYPOTHETICAL PROTEIN CAB08634                        | -0,0787349    |
| ANATVYMIDSVLMP   | CAA98373.1; MAJOR SECRETED IMMUNOGENIC PROTEIN                 | -0,079265066  |
| DLFVGNNISGIPTL   | YP_177963; PPE FAMILY PROTEIN                                  | -0,079452154  |
| PRPREPRRCWPRSRCP | MYCOBACTERIUM BOVIS MYCOCEROSIC ACID SYNTHASE GENE; M95808     | -0,080070107  |
| VMQQGELFAKQEQLF  | CONSERVED HYPOTHETICAL PROTEIN TB18.5CAD93033                  | -0,081310769  |
| INIRPVVAAIKEFFG  | RNA POLYMERASE BETA-SUBUNIT AAA21416                           | -0,08134969   |
| YLKDHDTGLDIQIM   | PROBABLE ISOCITRATE DEHYDROGENASE CAA16247                     | -0,082534993  |
| SPRWRESAAERGDVN  | RNA POLYMERASE BETA-SUBUNIT AAA21416                           | -0,082686603  |
| FTAHTKHYRVVSKPA  | CAE55335.1; PE FAMILY PROTEIN                                  | -0,082946976  |
| IAASYDAGVLTVRVA  | CAA17343.1; HEAT SHOCK PROTEIN HSP                             | -0,083632452  |
| ASNSTGMSGGFVTAP  | YP_177963; PPE FAMILY PROTEIN                                  | -0,084841509  |
| FQEAANKQKQELDEI  | CAA17966.1; 10 KDA CULTURE FILTRATE ANTIGEN ESXB               | -0,086572623  |
| LSSLGWNLCRIFTDG  | POSSIBLE GLYCOSYL TRANSFERASE CAB05415                         | -0,088058909  |
| RKIPLTLVHAVSPEV  | HYPOTHETICAL PROTEIN RV2623 NP_217139                          | -0,088232675  |
| TKVDDRPINSADALV  | CAA17582.1; PROBABLE SERINE PROTEASE PEPD                      | -0,089465709  |
| TRGRCAAISVPGDRR  | MYCOBACTERIUM BOVIS ACYL-COA SYNTHASE GENE; U75685             | -0,090174764  |
| KNVPANAFVADYLP   | POSSIBLE GLYCOSYL TRANSFERASE CAB05418                         | -0,091497454  |
| NRANEVEAPMADPPT  | MTB48 AAK31576                                                 | -0,092137708  |
| RRDPRWEADLDVLDE  | MYCOBACTERIUM BOVIS MYCOCEROSIC ACID SYNTHASE GENE; M95808     | -0,093269203  |
| FGFGNSGLAAGLAGM  | YP_177963; PPE FAMILY PROTEIN                                  | -0,093747878  |
| AEAEYEQIWAQDVAA  | PPE FAMILY PROTEIN CAE55504                                    | -0,094304556  |
| SLSAGHAKPCAGGGA  | MYCOBACTERIUM BOVIS ACYL-COA SYNTHASE GENE; U75685             | -0,095064813  |
| TVASCPNTRIVLGGY  | PROBABLE CUTINASE PRECURSOR CFP21 NP_216500                    | -0,095218522  |
| FTDGDYTLYADVPEL  | POSSIBLE GLYCOSYL TRANSFERASE CAB05418                         | -0,096144215  |
| TNDGVSIKIEIELED  | 60 kDa chaperonin 2 P0A521                                     | -0,096735389  |
| HSGWKVDAAKGVPDW  | RNA POLYMERASE BETA-SUBUNIT AAA21416                           | -0,096899365  |
| PGAAQYIGLVESVAG  | LOW MOLECULAR WEIGHT T-CELL ANTIGEN TB8.4 NP_215690            | -0,099226827  |
| VVWGLTVGSGWIGSSA | CAE55371.1; PPE FAMILY PROTEIN                                 | -0,099287706  |
| GFHMOVAPDPNGERAG | 3-OXOACYL-[ACYL-CARRIER PROTEIN] SYNTHASE 2 KASB CAA94642      | -0,099297075  |
| FAVQVALAATMEQTY  | MYCOBACTERIUM BOVIS MYCOCEROSIC ACID SYNTHASE GENE; M95808     | -0,100160942  |
| SELATAIAFDEASRR  | HYPOTHETICAL PROTEIN RV2623 NP_217139                          | -0,101369903  |
| HLRWDSLGEFLALGA  | PROBABLE ISOCITRATE DEHYDROGENASE CAA16247                     | -0,101537906  |
| VGDLRLSLVSARLA   | POSSIBLE GLYCOSYL TRANSFERASE CAB05415                         | -0,101898927  |
| GGNIMAHVSIVQSGM  | PROBABLE CUTINASE PRECURSOR CFP21 NP_216500                    | -0,101917471  |
| RGEPRDDLIQVARVG  | ALTERNATE RNA POLYMERASE SIGMA FACTOR SIGF CAB07069            | -0,102936807  |
| MTYAAPLFVTAEFIN  | RNA POLYMERASE BETA-SUBUNIT AAA21416                           | -0,103648401  |
| LYTHVIAGQASPSRI  | CAA98350.1; CELL SURFACE LIPOPROTEIN MPT83                     | -0,10389026   |
| SSAGLMVAAASPYVA  | CAE55371.1; PPE FAMILY PROTEIN                                 | -0,105586496  |
| IFGEKAREVRDTSK   | RNA POLYMERASE BETA-SUBUNIT AAA21416                           | -0,105978606  |
| PGAARWSPGDSATVA  | TRANSMEMBRANE SERINE/THREONINE-PROTEIN KINASE D PKND NP_215446 | -0,106558293  |
| LLKGAKEVETKEQIA  | 60 kDa chaperonin 2 P0A521                                     | -0,108180039  |
| TIKTWDDPQIAALNP  | PERIPLASMIC PHOSPHATE-BINDING LIPOPROTEIN PSTS1 YP_177770      | -0,109619753  |
| YVIAGDIPLINIPPT  | YP_177963; PPE FAMILY PROTEIN                                  | -0,111653732  |
| DVILEAAGDKKIGVI  | CAB07109.1; PROBABLE 50S RIBOSOMAL PROTEIN L7/L12 RPLL         | -0,111888089  |
| NQSFPTVNVWSTPAV  | YP_177963; PPE FAMILY PROTEIN                                  | -0,113173935  |
| MNFPVLPPEINSVLM  | YP_177963; PPE FAMILY PROTEIN                                  | -0,113387986  |
| SSDLRVGQPVLAIGS  | CAA17582.1; PROBABLE SERINE PROTEASE PEPD                      | -0,113566083  |
| SYNTGIGNSGTGSTG  | YP_177963; PPE FAMILY PROTEIN                                  | -0,113806704  |
| WSPTQASGQTVLPFT  | TRANSMEMBRANE SERINE/THREONINE-PROTEIN KINASE D PKND NP_215446 | -0,114304346  |

| Peptides        | Protein                                                                   | Average Index |
|-----------------|---------------------------------------------------------------------------|---------------|
| LSFTLTGNPNRPDGG | PPE FAMILY PROTEIN CAE55504                                               | -0,114775244  |
| NTGGFNPSTNTGWF  | YP_177963; PPE FAMILY PROTEIN                                             | -0,116290228  |
| APIQADMMGNAFLTA | CAB10947.1; PROBABLE LIPOPROTEIN LPRJ                                     | -0,118131858  |
| TDIDPDSFWAGVDKV | MTB81 (publication)                                                       | -0,118267936  |
| LQQLAQPTQGTPSS  | CAE55371.1; PPE FAMILY PROTEIN                                            | -0,118460521  |
| IKKHGVBVKCATITP | CAA17111.1; PROBABLE ISOCITRATE DEHYDROGENASE                             | -0,118769214  |
| MLDVNFFDELRIGLA | RNA POLYMERASE BETA'-SUBUNIT AAA21417                                     | -0,118774235  |
| KGASETFNGGVGVGA | PERIPLASMIC PHOSPHATE-BINDING LIPOPROTEIN PSTS2<br>YP_177769              | -0,118858236  |
| GGINSPDKLWESLLR | MYCOBACTERIUM BOVIS MYCOCEROSIC ACID SYNTHASE GENE;<br>M95808             | -0,120195121  |
| TMTELMADMVETKIA | MTB81 (publication)                                                       | -0,122277649  |
| LLRYAATNRLGSHRS | CONSERVED HYPOTHETICAL PROTEIN CAB08634                                   | -0,123385066  |
| RAAAEAFGTAFAMTV | PPE FAMILY PROTEIN CAE55334                                               | -0,124875653  |
| PINSADALVAVRSK  | CAA17582.1; PROBABLE SERINE PROTEASE PEPD                                 | -0,126022613  |
| LSQFMDQNNPLSGLT | RNA POLYMERASE BETA-SUBUNIT AAA21416                                      | -0,126067928  |
| DPQIAALNPGVNLPG | PERIPLASMIC PHOSPHATE-BINDING LIPOPROTEIN PSTS1<br>YP_177770              | -0,126468248  |
| LLAKSGKTIVLKPEV | PROBABLE ISOCITRATE DEHYDROGENASE CAA16247                                | -0,127275906  |
| LTFYYLDLALMSVTQ | MYCOBACTERIUM BOVIS MYCOCEROSIC ACID SYNTHASE GENE;<br>M95808             | -0,127899824  |
| DNWIVGASNSTGMSG | YP_177963; PPE FAMILY PROTEIN                                             | -0,128680841  |
| LAILIGPEQDWLNSE | CAA17111.1; PROBABLE ISOCITRATE DEHYDROGENASE                             | -0,128897185  |
| IRLDYYDLGIEHRDA | CAA17111.1; PROBABLE ISOCITRATE DEHYDROGENASE                             | -0,128950472  |
| PAEVAFTCELFSRVE | MTB81 (publication)                                                       | -0,129407613  |
| QIADRMFLAEKTVKN | TWO COMPONENT TRANSCRIPTIONAL REGULATORY PROTEIN<br>DEVN NP_217649        | -0,131253556  |
| YMAGEWSSKELTRVL | PUTATIVE CYCLOPROPANE-FATTY-ACYL-PHOSPHOLIPID<br>SYNTHASE UFAA1 NP_854118 | -0,13282891   |
| APAQAAPPALSQDRF | CAB09453.1; PROBABLE SERINE PROTEASE PEPA                                 | -0,132930422  |
| VLNFGSGVSGLYNTG | YP_177963; PPE FAMILY PROTEIN                                             | -0,132986596  |
| ANYGFAVPDIPIAI  | YP_177963; PPE FAMILY PROTEIN                                             | -0,134441257  |
| LTVLALRDQVIPPTL | 3-OXOACYL-[ACYL-CARRIER PROTEIN] SYNTHASE 2 KASB<br>CAA94642              | -0,134672946  |
| KASGSTAQANAMTRF | PERIPLASMIC PHOSPHATE-BINDING LIPOPROTEIN PSTS3<br>YP_177768              | -0,134712349  |
| TNQDGRTELTMPSE  | MYCOBACTERIUM BOVIS MYCOCEROSIC ACID SYNTHASE GENE;<br>M95808             | -0,136252138  |
| SGGSGGSGQPSIIDA | YP_177963; PPE FAMILY PROTEIN                                             | -0,136781068  |
| LVNIGPFRIEIDVP  | YP_177963; PPE FAMILY PROTEIN                                             | -0,137853759  |
| DTGALMSGNFSNGIL | YP_177963; PPE FAMILY PROTEIN                                             | -0,137921707  |
| DEMTRVIWLIKDML  | CAA17111.1; PROBABLE ISOCITRATE DEHYDROGENASE                             | -0,138017744  |
| PAHAAHHLVEGVARV | POSSIBLE HEMOLYSIN-LIKE PROTEIN CAA17201                                  | -0,138038762  |
| FRPSWPDHSRDQARR | PUTATIVE CYCLOPROPANE-FATTY-ACYL-PHOSPHOLIPID<br>SYNTHASE UFAA1 NP_854118 | -0,139942488  |
| AIVDTDGSEVFEGIM | MTB81 (publication)                                                       | -0,140070359  |
| YNTAIVGLGTPALVS | YP_177963; PPE FAMILY PROTEIN                                             | -0,140133856  |
| NTGAGGGSGFGNFGA | YP_177963; PPE FAMILY PROTEIN                                             | -0,141266293  |
| PESSPGDAEVGPRLF | MYCOBACTERIUM BOVIS MYCOCEROSIC ACID SYNTHASE GENE;<br>M95808             | -0,142320364  |
| GLSNTIVDKFLKRL  | POSSIBLE GLYCOSYL TRANSFERASE CAB05419                                    | -0,142657535  |
| VSSFGMSGTNVHAIV | MYCOBACTERIUM BOVIS MYCOCEROSIC ACID SYNTHASE GENE;<br>M95808             | -0,142868919  |
| SEIAAASYDAGVLTV | CAA17343.1; HEAT SHOCK PROTEIN HSP                                        | -0,143275654  |
| VLMVVGCLGSGRWPG | HYPOTHETICAL PROTEIN RV2623 NP_217139                                     | -0,143954308  |
| GGVSGFGNFGAGSSG | YP_177963; PPE FAMILY PROTEIN                                             | -0,144927959  |
| ATDEPEPHWGPFGGA | PPE FAMILY PROTEIN CAE55334                                               | -0,145015179  |
| VNIGASDAYLSEGDM | PERIPLASMIC PHOSPHATE-BINDING LIPOPROTEIN PSTS1<br>YP_177770              | -0,145576163  |
| KDVDIMVRDQGLTIK | CAA17245.1; HEAT SHOCK PROTEIN HSPX                                       | -0,146383806  |
| QTYGVDDVGYDRTQD | CAB09453.1; PROBABLE SERINE PROTEASE PEPA                                 | -0,147848034  |
| TTVALGRSVCMPMVA | CAB10947.1; PROBABLE LIPOPROTEIN LPRJ                                     | -0,14890895   |
| SVPKTSTYALTATNM | SECRETED L-ALANINE DEHYDROGENASE ALD CAA15575                             | -0,148953071  |
| ITGTRIDPIPLNFDV | YP_177963; PPE FAMILY PROTEIN                                             | -0,149292252  |
| DMGVEHVYDSRSVEF | MYCOBACTERIUM BOVIS MYCOCEROSIC ACID SYNTHASE GENE;                       | -0,149299443  |

| Peptides         | Protein                                                                      | Average Index |
|------------------|------------------------------------------------------------------------------|---------------|
|                  | M95808                                                                       |               |
| WTKPIVIGRHAFGDQ  | CAA17111.1; PROBABLE ISOCITRATE DEHYDROGENASE                                | -0,149463323  |
| ANLGRAASVGSLSVP  | CAE55371.1; PPE FAMILY PROTEIN                                               | -0,149600602  |
| VFRARMQREADTAGR  | TRANSMEMBRANE SERINE/THREONINE-PROTEIN KINASE D PKND NP_215446               | -0,150458274  |
| TIPLAKELAWAPDEI  | MTB81 (publication)                                                          | -0,151760685  |
| LSSMLKGFAPAAAAQ  | CAE55371.1; PPE FAMILY PROTEIN                                               | -0,151875534  |
| GESGKVIGIRVFSRE  | RNA POLYMERASE BETA-SUBUNIT AAA21416                                         | -0,152576476  |
| EVFGEEAEVRDITFE  | MYCOBACTERIUM BOVIS MYCOCEROSIC ACID SYNTHASE GENE; M95808                   | -0,153835072  |
| SGVIEEVSADYITVM  | RNA POLYMERASE BETA-SUBUNIT AAA21416                                         | -0,153889286  |
| GPAGPAAAAAATQAA  | PPE FAMILY PROTEIN CAE55334                                                  | -0,15509305   |
| RIVMADSRPLTNVNS  | CAA16030.1; PROBABLE MOLYBDOPTERIN-GUANINE DINUCLEOTIDE BIOSYNTHESIS PROTEIN | -0,156195863  |
| AYSEAGFRSGYLDVY  | PUTATIVE CYCLOPROPANE-FATTY-ACYL-PHOSPHOLIPID SYNTHASE UFAA1 NP_854118       | -0,15623861   |
| GLANAGSYNTGSLNA  | YP_177963; PPE FAMILY PROTEIN                                                | -0,156315684  |
| KLADGVLTAPQCTH   | MYCOBACTERIUM BOVIS MYCOCEROSIC ACID SYNTHASE GENE; M95808                   | -0,15637674   |
| QADMMGNAFLTALTN  | CAB10947.1; PROBABLE LIPOPROTEIN LPRJ                                        | -0,157709716  |
| GLFGLNVGITIPEFP  | YP_177963; PPE FAMILY PROTEIN                                                | -0,157870238  |
| QPGSYPIVLATYEIV  | PERIPLASMIC PHOSPHATE-BINDING LIPOPROTEIN PSTS2 YP_177769                    | -0,159017115  |
| ASCRFVPTCSQYAVD  | POSSIBLE HEMOLYSIN CAA16235                                                  | -0,159064901  |
| TSEIEPFIVWTSSGA  | YP_177963; PPE FAMILY PROTEIN                                                | -0,160340663  |
| QPVVLAATGDLPTI   | CAE55335.1; PE FAMILY PROTEIN                                                | -0,160357476  |
| LSGCSSNKSTTGSGE  | LIPOPROTEIN LPQH PRECURSOR P0A5J0                                            | -0,161103986  |
| FSTPPITIDRIPLNL  | YP_177963; PPE FAMILY PROTEIN                                                | -0,161117124  |
| RREFKARAAEKPAAPS | MTB81 (publication)                                                          | -0,161285709  |
| SPLAAAAAWDGLAE   | YP_177963; PPE FAMILY PROTEIN                                                | -0,162224602  |
| DSVAAVDAADKVLGY  | MTB81 (publication)                                                          | -0,16283228   |
| LIPGFLMPPSDGSGV  | MTB48 AAK31576                                                               | -0,163437319  |
| NLFPLGLPGLDLLPG  | CAB06237.1; CONSERVED HYPOTHETICAL PROTEIN                                   | -0,164056206  |
| LGQNTPAIAVNEAEY  | CAE55371.1; PPE FAMILY PROTEIN                                               | -0,164206229  |
| GLYSSKTINLCAPD   | PROBABLE CUTINASE PRECURSOR CFP21 NP_216500                                  | -0,165432565  |
| WISEYKEVEILEADD  | CONSERVED HYPOTHETICAL PROTEIN TB16.3CAD97060                                | -0,166510769  |
| DSLPTDRPIVYATLG  | POSSIBLE GLYCOSYL TRANSFERASE CAB05415                                       | -0,166576605  |
| AVQQGLAGKRRATIE  | MTB81 (publication)                                                          | -0,166590266  |
| ELGRLTQLPDTNIIK  | PROBABLE ISOCITRATE DEHYDROGENASE CAA16247                                   | -0,167558673  |
| GPYLQRGVADLVPTA  | MCE-FAMILY PROTEIN MCE1AYP_177701                                            | -0,167625355  |
| LLVGVNVGLSTIAGR  | CAB08889.1; IRON-REGULATED CONSERVED HYPOTHETICAL PROTEIN                    | -0,168572449  |
| MKEGRYEVRAELPGV  | CAA17245.1; HEAT SHOCK PROTEIN HSPX                                          | -0,168729832  |
| SEGCAMVLLKRLPDA  | MYCOBACTERIUM BOVIS MYCOCEROSIC ACID SYNTHASE GENE; M95808                   | -0,168876205  |
| NAMTRFVNVEQACP   | PERIPLASMIC PHOSPHATE-BINDING LIPOPROTEIN PSTS3 YP_177768                    | -0,169401079  |
| EVHFACDPRFNKLLG  | POSSIBLE GLYCOSYL TRANSFERASE CAB05418                                       | -0,169702202  |
| ENILVTASDFAYLVD  | TRANSMEMBRANE SERINE/THREONINE-PROTEIN KINASE D PKND NP_215446               | -0,169783762  |
| TDEQAITAATAHATA  | MYCOBACTERIUM BOVIS MYCOCEROSIC ACID SYNTHASE GENE; M95808                   | -0,170048529  |
| LPTVTIPTITTSPIP  | YP_177963; PPE FAMILY PROTEIN                                                | -0,170839498  |
| TVIGGTSDTVRLIA   | MYCOBACTERIUM BOVIS MYCOCEROSIC ACID SYNTHASE GENE; M95808                   | -0,171381836  |
| IVISNVRLVPGWTK   | CAA17111.1; PROBABLE ISOCITRATE DEHYDROGENASE                                | -0,171425604  |
| EFRLNNEFNVDVG    | CAB01474.1; CONSERVED HYPOTHETICAL PROTEIN CFP17                             | -0,171844343  |
| AGGLASPYVVTGLNN  | MYCOBACTERIUM BOVIS MYCOCEROSIC ACID SYNTHASE GENE; M95808                   | -0,172067191  |
| VVVFGTQSATIATF   | PPE FAMILY PROTEIN CAE55504                                                  | -0,172913822  |
| DADPLAKAASGGGNG  | MCE-FAMILY PROTEIN MCE1AYP_177701                                            | -0,173514756  |
| ANPMSPVNSFEIEV   | LIPOPROTEIN LPQH PRECURSOR P0A5J0                                            | -0,174224316  |
| EYKEVEILEADDEGY  | CONSERVED HYPOTHETICAL PROTEIN TB16.3CAD97060                                | -0,174495455  |
| TGMPAAPMPVPTGSP  | MTB48 AAK31576                                                               | -0,174749564  |
| GDMAGYAGTLQSLGA  | CAA16104.1; SECRETED ESAT-6 LIKE PROTEIN ESXR                                | -0,17477305   |

| Peptides         | Protein                                                                         | Average Index |
|------------------|---------------------------------------------------------------------------------|---------------|
| AADVAAMAGYHSGAS  | YP_177963; PPE FAMILY PROTEIN                                                   | -0,174823066  |
| GQVVGMMNTAASDNFQ | CAB09453.1; PROBABLE SERINE PROTEASE PEPA                                       | -0,17513399   |
| SAAFAAPAQANPVD   | CONSERVED HYPOTHETICAL PROTEIN CAA15739                                         | -0,175311239  |
| TSDEAMLDAILAGAS  | TWO COMPONENT TRANSCRIPTIONAL REGULATORY PROTEIN<br>DEVN NP_217649              | -0,175793812  |
| NFQKYLDGASNGAWG  | PERIPLASMIC PHOSPHATE-BINDING LIPOPROTEIN PSTS2<br>YP_177769                    | -0,175944873  |
| PDGNGIELCRDLLSR  | TWO COMPONENT TRANSCRIPTIONAL REGULATORY PROTEIN<br>DEVN NP_217649              | -0,176625491  |
| DPTSDIAVVRVQGV   | CAA17582.1; PROBABLE SERINE PROTEASE PEPA                                       | -0,176840191  |
| IKERYARCLGSAVNP  | PROBABLE ISOCITRATE DEHYDROGENASE CAA16247                                      | -0,177253053  |
| EIVKDGDDAVVRLEL  | CAA17343.1; HEAT SHOCK PROTEIN HSP                                              | -0,177530568  |
| NPQVGSAQPIVPTP   | PPE FAMILY PROTEIN CAE55334                                                     | -0,177829373  |
| TAAQNGVVRAMSSLGS | CAE55371.1; PPE FAMILY PROTEIN                                                  | -0,178355057  |
| FFNTGGGGGSGIANF  | YP_177963; PPE FAMILY PROTEIN                                                   | -0,178787115  |
| PAVFAVQVALAATME  | MYCOBACTERIUM BOVIS MYCOCEROSIC ACID SYNTHASE GENE;<br>M95808                   | -0,179001881  |
| PGLPDFKWPPTPGSP  | CAB06237.1; CONSERVED HYPOTHETICAL PROTEIN                                      | -0,179074005  |
| GLGLATAPAQAAPPA  | CAB09453.1; PROBABLE SERINE PROTEASE PEPA                                       | -0,180793078  |
| EKAIKERYARCLGSA  | PROBABLE ISOCITRATE DEHYDROGENASE CAA16247                                      | -0,181214217  |
| WAGRLRRLLEQASV   | MYCOBACTERIUM BOVIS MYCOCEROSIC ACID SYNTHASE GENE;<br>M95808                   | -0,181441312  |
| EAGDIWRMCIVKDAP  | PROBABLE ISOCITRATE DEHYDROGENASE CAA16247                                      | -0,181733021  |
| RNFLAAPPQRAAMA   | LOW MOLECULAR WEIGHT T-CELL ANTIGEN TB8.4 NP_215690                             | -0,182207518  |
| IVKVALEAPLKQIAF  | 60 kDa chaperonin 2 P0A521                                                      | -0,182383221  |
| IPIGQAMAIAQIRS   | CAB09453.1; PROBABLE SERINE PROTEASE PEPA                                       | -0,182519184  |
| AGRNHLKNVPANAFV  | POSSIBLE GLYCOSYL TRANSFERASE CAB05418                                          | -0,183243348  |
| YNAARIANGMGATVT  | SECRETED L-ALANINE DEHYDROGENASE ALD CAA15575                                   | -0,183301284  |
| PGLTQTGTAVGTYNY  | TRANSMEMBRANE SERINE/THREONINE-PROTEIN KINASE D PKND<br>NP_215446               | -0,183776686  |
| AASLLTVDMDVQVTM  | CONSERVED HYPOTHETICAL PROTEIN TB18.5CAD93033                                   | -0,183850828  |
| GLWGLSGGSTIPAIP  | YP_177963; PPE FAMILY PROTEIN                                                   | -0,184513211  |
| MVIPPVFLPSMTIG   | YP_177963; PPE FAMILY PROTEIN                                                   | -0,184748421  |
| LPPDLASGVVQPVSS  | PPE FAMILY PROTEIN CAE55504                                                     | -0,185283477  |
| PIPLKIDVSGGLPAF  | YP_177963; PPE FAMILY PROTEIN                                                   | -0,186766311  |
| HEGQTTMTVPGGVEV  | RNA POLYMERASE BETA-SUBUNIT AAA21416                                            | -0,187270215  |
| TRVIWKLIKMDLILP  | CAA17111.1; PROBABLE ISOCITRATE DEHYDROGENASE                                   | -0,188179001  |
| MAAPGQPLPTLPVPV  | CAA16030.1; PROBABLE MOLYBDOPTERIN-GUANINE<br>DINUCLEOTIDE BIOSYNTHESIS PROTEIN | -0,188253178  |
| LSLSVSARLAGIPYI  | POSSIBLE GLYCOSYL TRANSFERASE CAB05418                                          | -0,189259247  |
| WPRAQGLPVSAIAWG  | MYCOBACTERIUM BOVIS MYCOCEROSIC ACID SYNTHASE GENE;<br>M95808                   | -0,190488101  |
| AALRACACLQPHDPA  | MYCOBACTERIUM BOVIS ACYL-COA SYNTHASE GENE; U75685                              | -0,191227682  |
| DELLDAFKEMTLLEL  | CAB07109.1; PROBABLE 50S RIBOSOMAL PROTEIN L7/L12 RPLL                          | -0,193620056  |
| VLKPEVPLDDGDVID  | PROBABLE ISOCITRATE DEHYDROGENASE CAA16247                                      | -0,193934774  |
| KGAGKSFQGGVGEGA  | PERIPLASMIC PHOSPHATE-BINDING LIPOPROTEIN PSTS3<br>YP_177768                    | -0,194237471  |
| WESLLRGDDLVTIEP  | MYCOBACTERIUM BOVIS MYCOCEROSIC ACID SYNTHASE GENE;<br>M95808                   | -0,194665763  |
| LKQIAFNGLPGVV    | 60 kDa chaperonin 2 P0A521                                                      | -0,194715257  |
| RTLNVARELSRCGST  | MYCOBACTERIUM BOVIS ACYL-COA SYNTHASE GENE; U75685                              | -0,195633881  |
| QKRKISDGDKLGRH   | RNA POLYMERASE BETA-SUBUNIT AAA21416                                            | -0,196560051  |
| GTAVSARNTAVCAPT  | CAE55335.1; PE FAMILY PROTEIN                                                   | -0,197187132  |
| ALPLTSLTAAERGP   | CAE55371.1; PPE FAMILY PROTEIN                                                  | -0,197536381  |
| PILDDLAAALADIAP  | MYCOBACTERIUM BOVIS MYCOCEROSIC ACID SYNTHASE GENE;<br>M95808                   | -0,197789918  |
| AHTPRREPRRCWPRS  | MYCOBACTERIUM BOVIS MYCOCEROSIC ACID SYNTHASE GENE;<br>M95808                   | -0,19882437   |
| HPHAVNGTAMRESFA  | MYCOBACTERIUM BOVIS MYCOCEROSIC ACID SYNTHASE GENE;<br>M95808                   | -0,199295443  |
| RYTCERLVRGLDTIA  | PROBABLE ISOCITRATE DEHYDROGENASE CAA16247                                      | -0,19955348   |
| TTTAPSSGFFNSGDG  | YP_177963; PPE FAMILY PROTEIN                                                   | -0,199773377  |
| PFTDITAPWGIAVDE  | TRANSMEMBRANE SERINE/THREONINE-PROTEIN KINASE D PKND<br>NP_215446               | -0,20006095   |
| LDELSFTLTGNPNRP  | PPE FAMILY PROTEIN CAE55504                                                     | -0,20110747   |

| Peptides         | Protein                                                                | Average Index |
|------------------|------------------------------------------------------------------------|---------------|
| TVGQVVLGWKVSCLK  | CAB06500.1; IMMUNOGENIC PROTEIN MPT63                                  | -0,201293271  |
| VSPLTVQKYMPNGAA  | 3-OXOACYL-[ACYL-CARRIER PROTEIN] SYNTHASE 2 KASB CAA94642              | -0,201359334  |
| SVPANVSRRRAKVDVL | CAB08889.1; IRON-REGULATED CONSERVED HYPOTHETICAL PROTEIN              | -0,203571537  |
| MALGKNLLVAIMPWE  | RNA POLYMERASE BETA-SUBUNIT AAA21416                                   | -0,204735963  |
| TSELPGWLSANRAVK  | CAB10044.1; SECRETED ANTIGEN 85-B FBPB (85B)                           | -0,204910453  |
| VSVAVSEGKPTKHI   | CAA17245.1; HEAT SHOCK PROTEIN HSPX                                    | -0,205233162  |
| AGLAPGDIDHVNAHA  | 3-OXOACYL-[ACYL-CARRIER PROTEIN] SYNTHASE 2 KASB CAA94642              | -0,205358515  |
| RVVRVTGRASARGLI  | POSSIBLE HEMOLYSIN CAA16235                                            | -0,206236058  |
| VPLVRSEAPLVGTGM  | RNA POLYMERASE BETA-SUBUNIT AAA21416                                   | -0,206407597  |
| HEVVRRLVDLLGAD   | TWO COMPONENT TRANSCRIPTIONAL REGULATORY PROTEIN DEVR NP_217649        | -0,206627714  |
| VGADEDDIKATYDKG  | CAA17245.1; HEAT SHOCK PROTEIN HSPX                                    | -0,207249684  |
| TIPAIPIGLELNGGV  | YP_177963; PPE FAMILY PROTEIN                                          | -0,207728964  |
| NDKSPSRKTGELDNR  | PROBABLE ISOCITRATE DEHYDROGENASE CAA16247                             | -0,207797022  |
| IQLAGLAPGDIDHVN  | 3-OXOACYL-[ACYL-CARRIER PROTEIN] SYNTHASE 2 KASB CAA94642              | -0,207867449  |
| APSLFIHRPDALARR  | PUTATIVE CYCLOPROPANE-FATTY-ACYL-PHOSPHOLIPID SYNTHASE UFAA1 NP_854118 | -0,208719588  |
| DADRSFIEYGLDSL   | MYCOBACTERIUM BOVIS MYCOCEROSIC ACID SYNTHASE GENE; M95808             | -0,208725463  |
| AGQAMASTEAGVTGM  | CAE55648                                                               | -0,209246103  |
| DRTVYVADRGNDRVV  | TRANSMEMBRANE SERINE/THREONINE-PROTEIN KINASE D PKND NP_215446         | -0,211283699  |
| LATAPAQAAPPALSQ  | CAB09453.1; PROBABLE SERINE PROTEASE PEPA                              | -0,211530699  |
| GLNYPEGLAVDTQGA  | TRANSMEMBRANE SERINE/THREONINE-PROTEIN KINASE D PKND NP_215446         | -0,211564209  |
| ARASSRYGHWHPAVA  | MYCOBACTERIUM BOVIS MYCOCEROSIC ACID SYNTHASE GENE; M95808             | -0,211931303  |
| AHLRPLGDELSTLT   | PPE FAMILY PROTEIN CAE55504                                            | -0,212362108  |
| AGSWLLIDTSNAVD   | MYCOBACTERIUM BOVIS MYCOCEROSIC ACID SYNTHASE GENE; M95808             | -0,212741112  |
| GVDVVGVDRTQDVA   | CAB09453.1; PROBABLE SERINE PROTEASE PEPA                              | -0,212767299  |
| RYFAALEQLVRPGGP  | PUTATIVE CYCLOPROPANE-FATTY-ACYL-PHOSPHOLIPID SYNTHASE UFAA1 NP_854118 | -0,213181742  |
| EPVVAMGNSGGQGGT  | CAB09453.1; PROBABLE SERINE PROTEASE PEPA                              | -0,213997114  |
| AENRAELMILIATNL  | CAE55371.1; PPE FAMILY PROTEIN                                         | -0,214607924  |
| ADEEQQALSSQMGF   | CAA17966.1; 10 KDA CULTURE FILTRATE ANTIGEN ESXB                       | -0,21510826   |
| AVKVTLPKGRNVVL   | 60 kDa chaperonin 2 P0A521                                             | -0,21528552   |
| ASIFAWTRGLQHRGK  | CAA17111.1; PROBABLE ISOCITRATE DEHYDROGENASE                          | -0,216001118  |
| NGGEYTVFAPTNAAF  | CAA98350.1; CELL SURFACE LIPOPROTEIN MPT83                             | -0,216039621  |
| VEAITPQTLINIRPV  | RNA POLYMERASE BETA-SUBUNIT AAA21416                                   | -0,216066448  |
| EFPAIPGFALPGLP   | CAB06237.1; CONSERVED HYPOTHETICAL PROTEIN                             | -0,216548678  |
| MDFGLLPPEVNSSRM  | PPE FAMILY PROTEIN CAE55334                                            | -0,217292024  |
| PDALRDGNRIFAVVR  | MYCOBACTERIUM BOVIS MYCOCEROSIC ACID SYNTHASE GENE; M95808             | -0,219385373  |
| IPSRGAWLEFDVDR   | RNA POLYMERASE BETA-SUBUNIT AAA21416                                   | -0,219801599  |
| MRHTIGQAEQAAMSA  | CONSERVED HYPOTHETICAL PROTEIN TB9.8 CAD93159                          | -0,220094395  |
| PGLIPGVIPTMTPPP  | CAA17582.1; PROBABLE SERINE PROTEASE PEPD                              | -0,22030787   |
| HQVRRVPVISEHRLV  | HYPOTHETICAL PROTEIN RV2626C NP_217142                                 | -0,220430411  |
| ALGQTVQASDSLTA   | CAB09453.1; PROBABLE SERINE PROTEASE PEPA                              | -0,222185544  |
| LVGVDGSSASELATA  | HYPOTHETICAL PROTEIN RV2623 NP_217139                                  | -0,222239673  |
| VVATTLALVSAPAGG  | PROBABLE CUTINASE PRECURSOR CFP21 NP_216500                            | -0,22251863   |
| LPDIPIPLDIPGL    | CAB06237.1; CONSERVED HYPOTHETICAL PROTEIN                             | -0,222610509  |
| DIVIPAFGGGTAPI   | YP_177963; PPE FAMILY PROTEIN                                          | -0,222994227  |
| VFGGKYVSLTTPKNP  | MCE-FAMILY PROTEIN MCE1AYP_177701                                      | -0,223178456  |
| VLSRRLWENAGSPEV  | 3-OXOACYL-[ACYL-CARRIER PROTEIN] SYNTHASE 2 KASB CAA94642              | -0,223933739  |
| TTVLPLFNGLYQPQGL | TRANSMEMBRANE SERINE/THREONINE-PROTEIN KINASE D PKND NP_215446         | -0,224769015  |
| TSSSQESGVIEEVA   | RNA POLYMERASE BETA-SUBUNIT AAA21416                                   | -0,224876475  |
| AATTDWYRPVAGDFT  | CAA17343.1; HEAT SHOCK PROTEIN HSP                                     | -0,225605795  |
| ATQSMAEQVLAERLA  | HYPOTHETICAL PROTEIN RV2623 NP_217139                                  | -0,225651955  |

| Peptides         | Protein                                                                | Average Index |
|------------------|------------------------------------------------------------------------|---------------|
| ATSIDPQQRLLLETS  | MYCOBACTERIUM BOVIS MYCOCEROSIC ACID SYNTHASE GENE; M95808             | -0,227023063  |
| ITTTAGPQLVVPVLN  | MTB81 (publication)                                                    | -0,227154238  |
| NRVSFAKLREPLEVP  | RNA POLYMERASE BETA-SUBUNIT AAA21416                                   | -0,227465034  |
| SYLRNFLAAPPQRA   | LOW MOLECULAR WEIGHT T-CELL ANTIGEN TB8.4 NP_215690                    | -0,228768923  |
| RNTAVCAPTTGVLPP  | CAE55335.1; PE FAMILY PROTEIN                                          | -0,229201156  |
| ARWSPGDSATVAGPL  | TRANSMEMBRANE SERINE/THREONINE-PROTEIN KINASE D PKND NP_215446         | -0,229627227  |
| YLNQNIAQQLRAQVM  | CAB06237.1; CONSERVED HYPOTHETICAL PROTEIN                             | -0,230275818  |
| TAEARTPAHAAHHLV  | POSSIBLE HEMOLYSIN-LIKE PROTEIN CAA17201                               | -0,230397368  |
| PVDDAFIAALNNAGV  | CONSERVED HYPOTHETICAL PROTEIN CAA15739                                | -0,231120165  |
| LPDIIDGLWPPKLPD  | CAB06237.1; CONSERVED HYPOTHETICAL PROTEIN                             | -0,231248692  |
| VAQANSPIDADGRFV  | RNA POLYMERASE BETA-SUBUNIT AAA21416                                   | -0,232101532  |
| RDYLTDLFPIELGT   | PROBABLE ISOCITRATE DEHYDROGENASE CAA16247                             | -0,232280859  |
| LNDLAQIKAGDKVLI  | MYCOBACTERIUM BOVIS MYCOCEROSIC ACID SYNTHASE GENE; M95808             | -0,233009767  |
| FPVTNVWSTPAVTIF  | YP_177963; PPE FAMILY PROTEIN                                          | -0,233157146  |
| ADGKAMLFDRSGEP   | RNA POLYMERASE BETA-SUBUNIT AAA21416                                   | -0,234203903  |
| FNAGDTNTGGFNPGS  | YP_177963; PPE FAMILY PROTEIN                                          | -0,234863847  |
| SYSYSLDVPRITILD  | YP_177963; PPE FAMILY PROTEIN                                          | -0,235029022  |
| DAAAMFGYAAATATA  | CAE55371.1; PPE FAMILY PROTEIN                                         | -0,235163618  |
| GRMCPIETPEGPNIG  | RNA POLYMERASE BETA-SUBUNIT AAA21416                                   | -0,236026235  |
| LTRLVDAADPEVVFV  | CONSERVED HYPOTHETICAL PROTEIN CAB08634                                | -0,236233194  |
| SIPNLFPGPLGLGDL  | CAB06237.1; CONSERVED HYPOTHETICAL PROTEIN                             | -0,236315736  |
| LYRLYRPLIFALYCL  | POSSIBLE GLYCOSYL TRANSFERASE CAB05418                                 | -0,236497837  |
| HVTSEAIAASYDAGV  | CAA17343.1; HEAT SHOCK PROTEIN HSP                                     | -0,236822325  |
| DDLVMNNAGLVCGGV  | CAA98350.1; CELL SURFACE LIPOPROTEIN MPT83                             | -0,236889271  |
| TVTIGIDKVPVFAV   | MYCOBACTERIUM BOVIS MYCOCEROSIC ACID SYNTHASE GENE; M95808             | -0,236996091  |
| LFNAGGFTTGLANAG  | YP_177963; PPE FAMILY PROTEIN                                          | -0,237457877  |
| PSEDAQVAVYRAALA  | MYCOBACTERIUM BOVIS MYCOCEROSIC ACID SYNTHASE GENE; M95808             | -0,237474881  |
| AAAQRRKIDRLLDVA  | PUTATIVE CYCLOPROPANE-FATTY-ACYL-PHOSPHOLIPID SYNTHASE UFAA1 NP_854118 | -0,237701458  |
| GGGLPADTAAQLTSA  | MTB48 AAK31576                                                         | -0,238045595  |
| GLTVGSWIGSSAGLM  | CAE55371.1; PPE FAMILY PROTEIN                                         | -0,23811435   |
| LNAQTGVYEDLLAAG  | 60 kDa chaperonin 2 P0A521                                             | -0,238948815  |
| LNYTANGSGAGISEF  | PERIPLASMIC PHOSPHATE-BINDING LIPOPROTEIN PSTS3 YP_177768              | -0,23980766   |
| VELPAKQVNSELMAR  | MYCOBACTERIUM BOVIS MYCOCEROSIC ACID SYNTHASE GENE; M95808             | -0,240016635  |
| GGAPNPYTYPENLPR  | MCE-FAMILY PROTEIN MCE1AYP_177701                                      | -0,240132256  |
| LVAANRSLMSLVAA   | PPE FAMILY PROTEIN CAE55334                                            | -0,241389277  |
| VIRLSDPYVVLID    | CONSERVED HYPOTHETICAL PROTEIN CAB08634                                | -0,242062147  |
| DIYALACVLGECLTG  | TRANSMEMBRANE SERINE/THREONINE-PROTEIN KINASE D PKND NP_215446         | -0,242133179  |
| VSAATATGLPLRGVL  | MYCOBACTERIUM BOVIS MYCOCEROSIC ACID SYNTHASE GENE; M95808             | -0,242867123  |
| VQGMSQDPVAVAASN  | CAA98373.1; MAJOR SECRETED IMMUNOGENIC PROTEIN                         | -0,243496944  |
| TLAQEAGNFERISGD  | CAA17966.1; 10 KDA CULTURE FILTRATE ANTIGEN ESXB                       | -0,244390068  |
| LAGDAWHGPASLAMT  | PPE FAMILY PROTEIN CAE55504                                            | -0,245109377  |
| PRQMVS VATAMIPFL | RNA POLYMERASE BETA-SUBUNIT AAA21416                                   | -0,245934551  |
| STGTTVLPFNGLYQP  | TRANSMEMBRANE SERINE/THREONINE-PROTEIN KINASE D PKND NP_215446         | -0,246196511  |
| PSASELAAELGMDRA  | ALTERNATE RNA POLYMERASE SIGMA FACTOR SIGF CAB07069                    | -0,246326212  |
| VLLAVRGLRMGTGTS  | MYCOBACTERIUM BOVIS MYCOCEROSIC ACID SYNTHASE GENE; M95808             | -0,246456172  |
| LGWKVSDLKSSSTAVI | CAB06500.1; IMMUNOGENIC PROTEIN MPT63                                  | -0,246921954  |
| DAPIRDVVKLAVTRA  | PROBABLE ISOCITRATE DEHYDROGENASE CAA16247                             | -0,247108732  |
| LAVQATPTFSSSAGA  | PPE FAMILY PROTEIN CAE55334                                            | -0,247744     |
| DVSGGLPAFTLFPGG  | YP_177963; PPE FAMILY PROTEIN                                          | -0,247851784  |
| TPREAPYELNITSAT  | CAA98382.1; IMMUNOGENIC PROTEIN MPT64                                  | -0,247869174  |
| MGTGTSE RDERDRLV | MYCOBACTERIUM BOVIS MYCOCEROSIC ACID SYNTHASE GENE; M95808             | -0,248056831  |
| PRRMNIGQILETHLG  | RNA POLYMERASE BETA-SUBUNIT AAA21416                                   | -0,248642978  |

| Peptides         | Protein                                                                      | Average Index |
|------------------|------------------------------------------------------------------------------|---------------|
| LPLPGGTTTTLVEHNV | CAA16030.1; PROBABLE MOLYBDOPTERIN-GUANINE DINUCLEOTIDE BIOSYNTHESIS PROTEIN | -0,249012513  |
| RRPTYVFAAVDHTGA  | CONSERVED HYPOTHETICAL PROTEIN CAB08634                                      | -0,249189207  |
| AELVKEVAKKTDQVA  | 60 kDa chaperonin 2 P0A521                                                   | -0,249263037  |
| FMSAGDLAIAAHDAL  | TRANSMEMBRANE SERINE/THREONINE-PROTEIN KINASE D PKND NP_215446               | -0,250673541  |
| IRGTFKSVAVKAPGF  | 60 kDa chaperonin 2 P0A521                                                   | -0,250865877  |
| IITLNVAAVLPACL   | POSSIBLE GLYCOSYL TRANSFERASE CAB05419                                       | -0,250946124  |
| NAGSYNTGSLNAGNT  | YP_177963; PPE FAMILY PROTEIN                                                | -0,251392723  |
| GLYNTGGLPPGTPAV  | YP_177963; PPE FAMILY PROTEIN                                                | -0,251437181  |
| YTSGSTRTAGVVMVS  | MYCOBACTERIUM BOVIS ACYL-COA SYNTHASE GENE; U75685                           | -0,25189353   |
| DVFDRGGPYLQRGVA  | MCE-FAMILY PROTEIN MCE1AYP_177701                                            | -0,252797117  |
| AHLTGNAAMGAFTIP  | YP_177963; PPE FAMILY PROTEIN                                                | -0,253412638  |
| TPALNIHQIPLGFQV  | YP_177963; PPE FAMILY PROTEIN                                                | -0,253710301  |
| DRVDTLVGAGERKMS  | CAA16030.1; PROBABLE MOLYBDOPTERIN-GUANINE DINUCLEOTIDE BIOSYNTHESIS PROTEIN | -0,253975274  |
| QAIFYRRGLFGTIGP  | POSSIBLE GLYCOSYL TRANSFERASE CAB05419                                       | -0,25426139   |
| LATYAFLPIVRAFAE  | PROBABLE ISOCITRATE DEHYDROGENASE CAA16247                                   | -0,255248357  |
| PGIDWPATQSMAEQV  | HYPOTHETICAL PROTEIN RV2623 NP_217139                                        | -0,255254707  |
| LEGTYRLAPKSGSTE  | CONSERVED HYPOTHETICAL PROTEIN TB16.3CAD97060                                | -0,255337141  |
| RVTGRASARGLIFVI  | POSSIBLE HEMOLYSIN CAA16235                                                  | -0,25609627   |
| PTDRPIVYATLTGSG  | POSSIBLE GLYCOSYL TRANSFERASE CAB05415                                       | -0,256259343  |
| HQIPLGFQVPGSIDA  | YP_177963; PPE FAMILY PROTEIN                                                | -0,256392468  |
| ALAAAAEVFGAAAEV  | MYCOBACTERIUM BOVIS MYCOCEROSIC ACID SYNTHASE GENE; M95808                   | -0,256860815  |
| MAKLARVVGLVQEEQ  | CAA17582.1; PROBABLE SERINE PROTEASE PEPD                                    | -0,25692159   |
| SAAIGLSMAGSSAMI  | CAB10044.1; SECRETED ANTIGEN 85-B FBPB (85B)                                 | -0,257104423  |
| LPVSAIWAAGWGEVG  | MYCOBACTERIUM BOVIS MYCOCEROSIC ACID SYNTHASE GENE; M95808                   | -0,257136838  |
| KTLKASGSTAQANAM  | PERIPLASMIC PHOSPHATE-BINDING LIPOPROTEIN PSTS3 YP_177768                    | -0,257378278  |
| RLAKLGMERRTQAA   | TWO COMPONENT TRANSCRIPTIONAL REGULATORY PROTEIN DEVR NP_217649              | -0,257460193  |
| DHHGLVGFYSIEIT   | YP_177963; PPE FAMILY PROTEIN                                                | -0,257875604  |
| MPPGSVEQVAAKVVP  | CAA17582.1; PROBABLE SERINE PROTEASE PEPD                                    | -0,258045382  |
| FLNNETDFAGSDVPL  | PERIPLASMIC PHOSPHATE-BINDING LIPOPROTEIN PSTS2 YP_177769                    | -0,258048323  |
| DVDWAEVAADLQQGA  | PPE FAMILY PROTEIN CAE55504                                                  | -0,258893838  |
| IKGMELARAVKDVGA  | TWO COMPONENT TRANSCRIPTIONAL REGULATORY PROTEIN DEVR NP_217649              | -0,259081588  |
| SVVATGAASLLTVDM  | CONSERVED HYPOTHETICAL PROTEIN TB18.5CAD93033                                | -0,259349902  |
| HGMLTDRDIVIKGLA  | HYPOTHETICAL PROTEIN RV2626C NP_217142                                       | -0,25981802   |
| VRVAAAAYETAYGLT  | CAE55371.1; PPE FAMILY PROTEIN                                               | -0,26050592   |
| TIMDFEDSVAAVDAA  | MTB81 (publication)                                                          | -0,26080098   |
| FGYPIPLFPAVGADV  | YP_177963; PPE FAMILY PROTEIN                                                | -0,260803709  |
| GIRLTPKVIATNKTA  | MYCOBACTERIUM BOVIS MYCOCEROSIC ACID SYNTHASE GENE; M95808                   | -0,260883665  |
| GFDNWEQDAATACEA  | MTB48 AAK31576                                                               | -0,261047313  |
| RLKELHLRLGTATA   | ALTERNATE RNA POLYMERASE SIGMA FACTOR SIGF CAB07069                          | -0,262089809  |
| EYLQVPSPSMGRDIK  | CAB10044.1; SECRETED ANTIGEN 85-B FBPB (85B)                                 | -0,262186568  |
| LGDVYADAAPDLDFD  | MCE-FAMILY PROTEIN MCE1AYP_177701                                            | -0,262249045  |
| SEIRMTSGSSSGFKV  | YP_177963; PPE FAMILY PROTEIN                                                | -0,262505674  |
| QLVRSPPGVYFDETID | RNA POLYMERASE BETA-SUBUNIT AAA21416                                         | -0,262537047  |
| APNAAPEPVARRQRI  | POSSIBLE GLYCOSYL TRANSFERASE CAB05418                                       | -0,262688822  |
| LDEIAPDLVVGDLRI  | POSSIBLE GLYCOSYL TRANSFERASE CAB05415                                       | -0,263761019  |
| SQASMGSSQQAQLIS  | CAB06237.1; CONSERVED HYPOTHETICAL PROTEIN                                   | -0,264325695  |
| TIPLNIHQTFSLGPL  | YP_177963; PPE FAMILY PROTEIN                                                | -0,265290733  |
| VFATELKRSRPPGDG  | TWO COMPONENT TRANSCRIPTIONAL REGULATORY PROTEIN DEVR NP_217649              | -0,26598899   |
| DWNPAKRGGERESFV  | POSSIBLE HEMOLYSIN CAA16235                                                  | -0,266579314  |
| SRRNVLDLVALHAWSD | HYPOTHETICAL PROTEIN RV2623 NP_217139                                        | -0,266658606  |
| TSSTPREAPYELNIT  | CAA98382.1; IMMUNOGENIC PROTEIN MPT64                                        | -0,267914552  |
| WLLSVLAAGVGLLAT  | CAB09453.1; PROBABLE SERINE PROTEASE PEPA                                    | -0,268031066  |
| YTLTDEAPLATYAF   | PROBABLE ISOCITRATE DEHYDROGENASE CAA16247                                   | -0,26856781   |
| IEPFIVWTSSGAIGP  | YP_177963; PPE FAMILY PROTEIN                                                | -0,268622766  |

| Peptides         | Protein                                                                | Average Index |
|------------------|------------------------------------------------------------------------|---------------|
| YILLVSSKVSTVKDL  | 60 kDa chaperonin 2 P0A521                                             | -0,26913761   |
| QPGTPGYAQGGQQQTY | CAA17582.1; PROBABLE SERINE PROTEASE PEPD                              | -0,269518943  |
| SVTPAVSQFNARTAD  | CAB06500.1; IMMUNOGENIC PROTEIN MPT63                                  | -0,270189119  |
| QQVSIAPNAGLDPVN  | CAA98382.1; IMMUNOGENIC PROTEIN MPT64                                  | -0,27062532   |
| KSNMGHSTASAGTVG  | MYCOBACTERIUM BOVIS MYCOCEROSIC ACID SYNTHASE GENE; M95808             | -0,271361886  |
| EVAGAGSGFANFGSL  | YP_177963; PPE FAMILY PROTEIN                                          | -0,271691592  |
| TGIAMTTALATDAET  | 3-OXOACYL-[ACYL-CARRIER PROTEIN] SYNTHASE 2 KASB CAA94642              | -0,27176684   |
| LHALHYHQVDAAVQ   | MTB81 (publication)                                                    | -0,272001328  |
| CVAYIGISFLDQASQ  | PERIPLASMIC PHOSPHATE-BINDING LIOPROTEIN PSTS1 YP_177770               | -0,272806694  |
| SDPAYNINISLPSYY  | CAA98382.1; IMMUNOGENIC PROTEIN MPT64                                  | -0,273437498  |
| RDLWPAPYLVMDTGA  | MCE-FAMILY PROTEIN MCE1AYP_177701                                      | -0,273451842  |
| IRDWVKLAVTRARIS  | PROBABLE ISOCITRATE DEHYDROGENASE CAA16247                             | -0,274052349  |
| MNLRRHQTLTLRLLA  | CONSERVED HYPOTHETICAL PROTEIN CAA15739                                | -0,274164873  |
| VLLSEMKMEIPVLA   | CAB08316.1; BIOTINYLATED PROTEIN TB7.3                                 | -0,27426449   |
| RAGAGVLLRTERLKS  | POSSIBLE GLYCOSYL TRANSFERASE CAB05415                                 | -0,274640316  |
| GAKEVETKEQIAATA  | 60 kDa chaperonin 2 P0A521                                             | -0,274748475  |
| AIPPRGTQAVVLKVY  | CAA98382.1; IMMUNOGENIC PROTEIN MPT64                                  | -0,275055044  |
| AQGLPVSAIAWGAWG  | MYCOBACTERIUM BOVIS MYCOCEROSIC ACID SYNTHASE GENE; M95808             | -0,275167435  |
| PPQEQGLIPGLMPP   | MTB48 AAK31576                                                         | -0,275252122  |
| PTTYDHPTFAVHDTL  | SECRETED L-ALANINE DEHYDROGENASE ALD CAA15575                          | -0,275389024  |
| VSVGDVIQAGDLIAV  | CAB08316.1; BIOTINYLATED PROTEIN TB7.3                                 | -0,275567743  |
| ANTVLDDLNSRMPQS  | MCE-FAMILY PROTEIN MCE1AYP_177701                                      | -0,276253547  |
| TGNAAMGAFTIPQID  | YP_177963; PPE FAMILY PROTEIN                                          | -0,277051017  |
| PIDADGRFVEPRVLV  | RNA POLYMERASE BETA-SUBUNIT AAA21416                                   | -0,277174225  |
| PLNFDVLSSAGPINI  | YP_177963; PPE FAMILY PROTEIN                                          | -0,278105051  |
| LHFGFTIPTGPIHI   | YP_177963; PPE FAMILY PROTEIN                                          | -0,278447769  |
| TEAVVADKPEKEKAS  | 60 kDa chaperonin 2 P0A521                                             | -0,278490491  |
| RPVYATLTGSSGRN   | POSSIBLE GLYCOSYL TRANSFERASE CAB05415                                 | -0,279764604  |
| IPGVIPMTPPPGMV   | CAA17582.1; PROBABLE SERINE PROTEASE PEPD                              | -0,280108334  |
| SWPDHSRDQARRNIA  | PUTATIVE CYCLOPROPANE-FATTY-ACYL-PHOSPHOLIPID SYNTHASE UFAA1 NP_854118 | -0,281073177  |
| PQPSQLRPGRVPPAL  | TRANSMEMBRANE SERINE/THREONINE-PROTEIN KINASE D PKND NP_215446         | -0,281319292  |
| PLADHIARRFEGRGE  | ALTERNATE RNA POLYMERASE SIGMA FACTOR SIGF CAB07069                    | -0,281373659  |
| MRESFAERGVTLGAA  | MYCOBACTERIUM BOVIS MYCOCEROSIC ACID SYNTHASE GENE; M95808             | -0,281519369  |
| NAGSTNVGLANMGVG  | YP_177963; PPE FAMILY PROTEIN                                          | -0,282070699  |
| STLTEEDVVATIEYL  | RNA POLYMERASE BETA-SUBUNIT AAA21416                                   | -0,282478319  |
| HVENALRLMPENRPR  | POSSIBLE GLYCOSYL TRANSFERASE CAB05415                                 | -0,282562859  |
| DDTVGRVKVYEAIVK  | RNA POLYMERASE BETA-SUBUNIT AAA21416                                   | -0,283308746  |
| YAGLTAANTKKVAMA  | POSSIBLE GLYCOSYL TRANSFERASE CAB05419                                 | -0,284479961  |
| NSGTDLPPTPISVIF  | PERIPLASMIC PHOSPHATE-BINDING LIOPROTEIN PSTS2 YP_177769               | -0,284509956  |
| LMSVTQPDRVRELLA  | MYCOBACTERIUM BOVIS MYCOCEROSIC ACID SYNTHASE GENE; M95808             | -0,284597395  |
| QSGSIGLGFAIPVDQ  | CAA17582.1; PROBABLE SERINE PROTEASE PEPD                              | -0,285275951  |
| DDLGVNVNGLSDLY   | PROBABLE ISOCITRATE DEHYDROGENASE CAA16247                             | -0,285677857  |
| YAFLPIVRAFAEPAG  | PROBABLE ISOCITRATE DEHYDROGENASE CAA16247                             | -0,285828488  |
| GLWKTVSPHRSPISN  | CAE55371.1; PPE FAMILY PROTEIN                                         | -0,28618684   |
| ASKTPANQAISMIDG  | PERIPLASMIC PHOSPHATE-BINDING LIOPROTEIN PSTS1 YP_177770               | -0,286668692  |
| ISTTPDAAPGLAARR  | POSSIBLE GLYCOSYL TRANSFERASE CAB05415                                 | -0,28697696   |
| VGATSEIEPFIVWTS  | YP_177963; PPE FAMILY PROTEIN                                          | -0,287526272  |
| GLREVADGDALYDAA  | MYCOBACTERIUM BOVIS MYCOCEROSIC ACID SYNTHASE GENE; M95808             | -0,287560729  |
| ADMLSELGEPVDRVA  | CONSERVED HYPOTHETICAL PROTEIN CAB08634                                | -0,289522384  |
| QTYGVRPGAVVGISM  | MYCOBACTERIUM BOVIS MYCOCEROSIC ACID SYNTHASE GENE; M95808             | -0,289883486  |
| VPDNLAEIGRLTQLP  | PROBABLE ISOCITRATE DEHYDROGENASE CAA16247                             | -0,290057251  |
| QAAPPALSQDRFADF  | CAB09453.1; PROBABLE SERINE PROTEASE PEPA                              | -0,290226698  |
| EDRQSLSWTLESSSL  | CONSERVED HYPOTHETICAL PROTEIN TB16.3CAD97060                          | -0,290311014  |

| Peptides        | Protein                                                                | Average Index |
|-----------------|------------------------------------------------------------------------|---------------|
| NEFNVDVGSNGTY   | CAB01474.1; CONSERVED HYPOTHETICAL PROTEIN CFP17                       | -0,290351938  |
| FKVRPSFSFFAVGPD | YP_177963; PPE FAMILY PROTEIN                                          | -0,290613773  |
| APKHVKQLVEENHLR | PROBABLE ISOCITRATE DEHYDROGENASE CAA16247                             | -0,290874209  |
| PPEVNSARIFAGAGL | PPE FAMILY PROTEIN CAE55504                                            | -0,291100018  |
| TPEVIDFAHKLESVV | CAA17111.1; PROBABLE ISOCITRATE DEHYDROGENASE                          | -0,291696502  |
| VDMANPMSPVNKSFE | LIPOPROTEIN LPQH PRECURSOR P0A5J0                                      | -0,29184029   |
| AGQASPSRIDGTHQT | CAA98350.1; CELL SURFACE LIPOPROTEIN MPT83                             | -0,291964307  |
| NATVYMIDSVLMPPA | CAA98373.1; MAJOR SECRETED IMMUNOGENIC PROTEIN                         | -0,292458831  |
| KGLMNIALAISAAQV | PERIPLASMIC PHOSPHATE-BINDING LIPOPROTEIN PSTS1 YP_177770              | -0,292758238  |
| STNNDDPAGACRPF  | 3-OXOACYL-[ACYL-CARRIER PROTEIN] SYNTHASE 2 KASB CAA94642              | -0,292919162  |
| MREHDIGALPICGDD | HYPOTHETICAL PROTEIN RV2626C NP_217142                                 | -0,293141725  |
| AQTEVAGAGSGFANF | YP_177963; PPE FAMILY PROTEIN                                          | -0,294237372  |
| ISVTWQTKSGGTRTG | CAB09453.1; PROBABLE SERINE PROTEASE PEPA                              | -0,294268483  |
| QEITRGRCAAISVPG | MYCOBACTERIUM BOVIS ACYL-COA SYNTHASE GENE; U75685                     | -0,294407147  |
| LDPSQGMGPSLIGLA | CAB10044.1; SECRETED ANTIGEN 85-B FBPB (85B)                           | -0,294498924  |
| DIKATYDKGILTYSV | CAA17245.1; HEAT SHOCK PROTEIN HSPX                                    | -0,294623427  |
| LRAAGADIVVECGNI | MYCOBACTERIUM BOVIS MYCOCEROSIC ACID SYNTHASE GENE; M95808             | -0,294767397  |
| AGVTCVGEHETLTAA | HYPOTHETICAL PROTEIN RV2626C NP_217142                                 | -0,295690683  |
| LRDGNRIFAVVRGTA | MYCOBACTERIUM BOVIS MYCOCEROSIC ACID SYNTHASE GENE; M95808             | -0,296226529  |
| PGSIDAITLFPGLT  | YP_177963; PPE FAMILY PROTEIN                                          | -0,296466059  |
| IQMSDPAYNINISLP | CAA98382.1; IMMUNOGENIC PROTEIN MPT64                                  | -0,29667051   |
| AESNNQVVLPTDIT  | TRANSMEMBRANE SERINE/THREONINE-PROTEIN KINASE D PKND NP_215446         | -0,297098607  |
| VLIAFGRFPIIDRE  | MYCOBACTERIUM BOVIS MYCOCEROSIC ACID SYNTHASE GENE; M95808             | -0,297325731  |
| DAYRQLTEIGYLLP  | MTB81 (publication)                                                    | -0,297380696  |
| NDDPAGACRPFDRDR | 3-OXOACYL-[ACYL-CARRIER PROTEIN] SYNTHASE 2 KASB CAA94642              | -0,297851906  |
| EIVPAAAVPTLVDMS | HYPOTHETICAL PROTEIN RV2623 NP_217139                                  | -0,298532608  |
| GEVMKAIADIEAYPQ | CONSERVED HYPOTHETICAL PROTEIN TB16.3CAD97060                          | -0,298597724  |
| LRVGQPVLAIGSPLG | CAA17582.1; PROBABLE SERINE PROTEASE PEPA                              | -0,298959825  |
| DAMARLGAIKREVT  | MYCOBACTERIUM BOVIS ACYL-COA SYNTHASE GENE; U75685                     | -0,299126203  |
| AGVPVIGLPSNMDQH | POSSIBLE GLYCOSYL TRANSFERASE CAB05418                                 | -0,299995465  |
| LGGGVGAFLNALFAG | YP_177963; PPE FAMILY PROTEIN                                          | -0,300304817  |
| FNAASQAFNTPALNI | YP_177963; PPE FAMILY PROTEIN                                          | -0,300905128  |
| VTSIHSLLDEGKQSL | CAE55648                                                               | -0,301434299  |
| ADMVETKIAQPRAGA | MTB81 (publication)                                                    | -0,301628129  |
| TVPANAFVADYLPGE | POSSIBLE GLYCOSYL TRANSFERASE CAB05415                                 | -0,30167776   |
| ARGANILARIMGASI | 3-OXOACYL-[ACYL-CARRIER PROTEIN] SYNTHASE 2 KASB CAA94642              | -0,301949212  |
| GSDSSMRAVDRAAQI | CAB08889.1; IRON-REGULATED CONSERVED HYPOTHETICAL PROTEIN              | -0,302032813  |
| LLPFEEAPEMTSAGG | CAE55371.1; PPE FAMILY PROTEIN                                         | -0,302550158  |
| RWLDPRHAGPATAAD | CAA16102.1; ESAT-6 LIKE PROTEIN ESXQ                                   | -0,302685519  |
| VKEVAKKTDDVAGDG | 60 kDa chaperonin 2 P0A521                                             | -0,302818206  |
| VHYDLSNDLFAAFLD | PUTATIVE CYCLOPROPANE-FATTY-ACYL-PHOSPHOLIPID SYNTHASE UFAA1 NP_854118 | -0,303521925  |
| LFVGEATLAHVVRP  | POSSIBLE GLYCOSYL TRANSFERASE CAB05418                                 | -0,30352505   |
| NGDEVQIGKFRVLFL | CAB01474.1; CONSERVED HYPOTHETICAL PROTEIN CFP17                       | -0,303707812  |
| TQLAPIQEGLQQQLQ | PPE FAMILY PROTEIN CAE55504                                            | -0,303827731  |
| VTLGPKGRNVVLEKK | 60 kDa chaperonin 2 P0A521                                             | -0,304320798  |
| LYQGATISSTKIDGV | CONSERVED HYPOTHETICAL PROTEIN CAB08634                                | -0,304505221  |
| QAARRLAEAFGPDA  | POSSIBLE GLYCOSYL TRANSFERASE CAB05418                                 | -0,304959639  |
| MPPSDGSGVTPGTGM | MTB48 AAK31576                                                         | -0,305090189  |
| NITSATYQSAIPPRG | CAA98382.1; IMMUNOGENIC PROTEIN MPT64                                  | -0,305987146  |
| GKYVSLTTPKNPTKR | MCE-FAMILY PROTEIN MCE1AYP_177701                                      | -0,306005592  |
| DKRDTVGVRIKRR   | RNA POLYMERASE BETA-SUBUNIT AAA21416                                   | -0,306892903  |
| ASIAGLFLTTEAVVA | 60 kDa chaperonin 2 P0A521                                             | -0,307104114  |
| MTVPPSLVAANRSRL | PPE FAMILY PROTEIN CAE55334                                            | -0,307209293  |
| VDAVINTTCNYGQVV | LOW MOLECULAR WEIGHT T-CELL ANTIGEN TB8.4 NP_215690                    | -0,307606723  |
| IAGAKIMGQGNLVL  | PERIPLASMIC PHOSPHATE-BINDING LIPOPROTEIN PSTS2                        | -0,307675972  |

| Peptides         | Protein                                                                      | Average Index |
|------------------|------------------------------------------------------------------------------|---------------|
|                  | YP_177769                                                                    |               |
| KLLAGSTTSTVLPFT  | TRANSMEMBRANE SERINE/THREONINE-PROTEIN KINASE D PKND NP_215446               | -0,307804265  |
| DETLDIANIFAPNLG  | POSSIBLE GLYCOSYL TRANSFERASE CAB05419                                       | -0,308127651  |
| AGFGHRVEIDLCDYR  | PUTATIVE CYCLOPROPANE-FATTY-ACYL-PHOSPHOLIPID SYNTHASE UFAA1 NP_854118       | -0,309083993  |
| YRQAAARLADAFGRD  | POSSIBLE GLYCOSYL TRANSFERASE CAB05415                                       | -0,309166664  |
| ERAGLEVVDVHPSHY  | RNA POLYMERASE BETA-SUBUNIT AAA21416                                         | -0,309334996  |
| AFLGLGVVDNNGNGA  | CAB09453.1; PROBABLE SERINE PROTEASE PEPA                                    | -0,30959663   |
| SADALVAAVRSKAPG  | CAA17582.1; PROBABLE SERINE PROTEASE PEPD                                    | -0,309909785  |
| GRIAVPLSVPQGGVT  | MYCOBACTERIUM BOVIS ACYL-COA SYNTHASE GENE; U75685                           | -0,31028006   |
| RVQGVSGLTPISLGS  | CAA17582.1; PROBABLE SERINE PROTEASE PEPD                                    | -0,310353426  |
| AKRIADELISTGKAS  | CAA17582.1; PROBABLE SERINE PROTEASE PEPD                                    | -0,310364935  |
| VAVSMSSINFADVLI  | MYCOBACTERIUM BOVIS MYCOCEROSIC ACID SYNTHASE GENE; M95808                   | -0,310559615  |
| GVYAVNYPASDDYRA  | PROBABLE CUTINASE PRECURSOR CFP21 NP_216500                                  | -0,31085694   |
| GSEVFEGIMDALFTG  | MTB81 (publication)                                                          | -0,311051358  |
| GDMAGYTGTQSLGA   | CAA16102.1; ESAT-6 LIKE PROTEIN ESXQ                                         | -0,31139554   |
| RLTQLPDTNIIKLPN  | PROBABLE ISOCITRATE DEHYDROGENASE CAA16247                                   | -0,312064589  |
| PANAFVADYLPGEAA  | POSSIBLE GLYCOSYL TRANSFERASE CAB05418                                       | -0,312491382  |
| NGEELYILSARDVLA  | CAB01005.1; 10 KDA CHAPERONIN GROES                                          | -0,312915914  |
| VVGGALLYLTIMTLM  | CAB06237.1; CONSERVED HYPOTHETICAL PROTEIN                                   | -0,31348225   |
| MNFAVLPPEVNSARI  | PPE FAMILY PROTEIN CAE55504                                                  | -0,313607824  |
| GTGLGSAELVFSYD   | 3-OXOACYL-[ACYL-CARRIER PROTEIN] SYNTHASE 2 KASB CAA94642                    | -0,313627094  |
| RSVGVPVLYLLGWVA  | POSSIBLE HEMOLYSIN-LIKE PROTEIN CAA17201                                     | -0,313742456  |
| AGQIRSGGGSPTVHI  | CAB09453.1; PROBABLE SERINE PROTEASE PEPA                                    | -0,314864584  |
| LAAPPPQRAAMAAQL  | LOW MOLECULAR WEIGHT T-CELL ANTIGEN TB8.4 NP_215690                          | -0,314976089  |
| IAITYNIKGVSTLNL  | PERIPLASMIC PHOSPHATE-BINDING LIPOPROTEIN PSTS2 YP_177769                    | -0,315371944  |
| GFAIPIGQAMAIAGQ  | CAB09453.1; PROBABLE SERINE PROTEASE PEPA                                    | -0,315908083  |
| HEANTMAMMARDTAE  | CAA17363.1; LOW MOLECULAR WEIGHT PROTEIN ANTIGEN 7 ESXH                      | -0,316341861  |
| AGILFLHSGLIALPP  | PPE FAMILY PROTEIN CAE55504                                                  | -0,316421221  |
| SPGDSATVAGPLAAD  | TRANSMEMBRANE SERINE/THREONINE-PROTEIN KINASE D PKND NP_215446               | -0,316747796  |
| ITPVHPGYTATFLET  | PPE FAMILY PROTEIN CAE55504                                                  | -0,317102105  |
| SGIAGAGTGPPTPGA  | TRANSMEMBRANE SERINE/THREONINE-PROTEIN KINASE D PKND NP_215446               | -0,317117294  |
| DGWNTFNLTQGDVK   | MTB48 AAK31576                                                               | -0,317249536  |
| SAGVGHAALVGALSV  | PPE FAMILY PROTEIN CAE55334                                                  | -0,31726059   |
| SPIEDFSGMSLSFS   | RNA POLYMERASE BETA-SUBUNIT AAA21416                                         | -0,317263109  |
| GRNLLQLVLNALAEL  | POSSIBLE GLYCOSYL TRANSFERASE CAB05415                                       | -0,317309225  |
| DDQQLAEHFASLADV  | PROBABLE ISOCITRATE DEHYDROGENASE CAA16247                                   | -0,317372642  |
| DKLWESLLRGDDLVT  | MYCOBACTERIUM BOVIS MYCOCEROSIC ACID SYNTHASE GENE; M95808                   | -0,317748081  |
| GRAASVGSLSVPQAW  | CAE55371.1; PPE FAMILY PROTEIN                                               | -0,317939763  |
| FGPVVVPPIPVLAIn  | YP_177963; PPE FAMILY PROTEIN                                                | -0,318302235  |
| EKVTTETLLKGAKEVE | 60 kDa chaperonin 2 P0A521                                                   | -0,318716937  |
| ADAIRAMSNAEHTGK  | MYCOBACTERIUM BOVIS MYCOCEROSIC ACID SYNTHASE GENE; M95808                   | -0,319251221  |
| TLLAVLTAAPLLLAA  | PERIPLASMIC PHOSPHATE-BINDING LIPOPROTEIN PSTS1 YP_177770                    | -0,319309267  |
| TGNMISNQAKYVSDT  | CAB06237.1; CONSERVED HYPOTHETICAL PROTEIN                                   | -0,319549482  |
| ASAYLPQHEDARAAD  | CAB08889.1; IRON-REGULATED CONSERVED HYPOTHETICAL PROTEIN                    | -0,319811041  |
| EAPYELNITSATYQS  | CAA98382.1; IMMUNOGENIC PROTEIN MPT64                                        | -0,31990998   |
| LFNAGSFNTGLANAG  | YP_177963; PPE FAMILY PROTEIN                                                | -0,319927709  |
| LGWTSEQIVERFGFS  | RNA POLYMERASE BETA-SUBUNIT AAA21416                                         | -0,319972494  |
| VFVMAAPGQPLPTLP  | CAA16030.1; PROBABLE MOLYBDOPTERIN-GUANINE DINUCLEOTIDE BIOSYNTHESIS PROTEIN | -0,320249258  |
| ADFPALPLDPSAMVA  | CAB09453.1; PROBABLE SERINE PROTEASE PEPA                                    | -0,320483185  |
| PDTAKEKPQEGTVVA  | CAB01005.1; 10 KDA CHAPERONIN GROES                                          | -0,32064721   |
| SPAVPNALQASLGHA  | TRANSMEMBRANE SERINE/THREONINE-PROTEIN KINASE D PKND NP_215446               | -0,320724516  |
| LYGTDVIPETDGAEK  | MTB81 (publication)                                                          | -0,3210012    |

| Peptides         | Protein                                                        | Average Index |
|------------------|----------------------------------------------------------------|---------------|
| TVLPILQIPTILNI   | YP_177963; PPE FAMILY PROTEIN                                  | -0,321076829  |
| LGEGIPDPGDIFNTG  | CAB06237.1; CONSERVED HYPOTHETICAL PROTEIN                     | -0,321109584  |
| PETINYRTLKPEKDG  | RNA POLYMERASE BETA'-SUBUNIT AAA21417                          | -0,321138829  |
| TIPAITFPEIPANAD  | YP_177963; PPE FAMILY PROTEIN                                  | -0,321269519  |
| AMFGYAAATATATAT  | CAE55371.1; PPE FAMILY PROTEIN                                 | -0,321328084  |
| IAVVSAGIGGAAASL  | CAA17582.1; PROBABLE SERINE PROTEASE PEPD                      | -0,321515781  |
| VPDYPADPKTDQEKA  | PROBABLE ISOCITRATE DEHYDROGENASE CAA16247                     | -0,321543539  |
| SPGDAEVGPRLFMLS  | MYCOBACTERIUM BOVIS MYCOCEROSIC ACID SYNTHASE GENE; M95808     | -0,322466257  |
| VLMYSGAGSSPLLAA  | YP_177963; PPE FAMILY PROTEIN                                  | -0,322601516  |
| AVKPTGSAAIGLSMA  | CAB10044.1; SECRETED ANTIGEN 85-B FBPB (85B)                   | -0,322685088  |
| AVNGTAMRESFAERG  | MYCOBACTERIUM BOVIS MYCOCEROSIC ACID SYNTHASE GENE; M95808     | -0,322754178  |
| IAEAMDKVGNIEGVIT | 60 kDa chaperonin 2 P0A521                                     | -0,323269501  |
| FDSMTQTQIAERVGI  | ALTERNATE RNA POLYMERASE SIGMA FACTOR SIGF CAB07069            | -0,323323866  |
| DTDGSEVFEGIMDAL  | MTB81 (publication)                                            | -0,323858187  |
| LTKNEDVIVRELTEV  | PROBABLE ISOCITRATE DEHYDROGENASE CAA16247                     | -0,324565856  |
| VFAPTNAAFDKLPAA  | CAA98350.1; CELL SURFACE LIPOPROTEIN MPT83                     | -0,325357981  |
| RPSWSPTQASGQTVL  | TRANSMEMBRANE SERINE/THREONINE-PROTEIN KINASE D PKND NP_215446 | -0,325457245  |
| TATILHNAGVTALVL  | POSSIBLE HEMOLYSIN-LIKE PROTEIN CAA17201                       | -0,325617948  |
| AWGKGASETfNGGVG  | PERIPLASMIC PHOSPHATE-BINDING LIPOPROTEIN PSTS2 YP_177769      | -0,325656012  |
| FALLALPAHDGRVVL  | POSSIBLE HEMOLYSIN-LIKE PROTEIN CAA17201                       | -0,325915869  |
| ELAWAPDEIRIEVDN  | MTB81 (publication)                                            | -0,32605642   |
| GLERHAKAGVMTPVS  | 3-OXOACYL-[ACYL-CARRIER PROTEIN] SYNTHASE 2 KASB CAA94642      | -0,326132765  |
| HACVAASAQGMLSST  | MYCOBACTERIUM BOVIS MYCOCEROSIC ACID SYNTHASE GENE; M95808     | -0,326295996  |
| PGNVNTGWLNTGNTN  | YP_177963; PPE FAMILY PROTEIN                                  | -0,326337066  |
| NNLIGLITGDNQTGF  | YP_177963; PPE FAMILY PROTEIN                                  | -0,326367772  |
| FVRNVGHMLMTNDAIV | MTB81 (publication)                                            | -0,326407841  |
| LTIPGLSLDAVSEI   | YP_177963; PPE FAMILY PROTEIN                                  | -0,326642526  |
| DPRFNKLLGPLPFPH  | POSSIBLE GLYCOSYL TRANSFERASE CAB05418                         | -0,3267025    |
| EAYQGVQKQWDTAT   | CAE55648                                                       | -0,327428099  |
| VDQAKRIADELISTG  | CAA17582.1; PROBABLE SERINE PROTEASE PEPD                      | -0,327512504  |
| DRARNVRMELLAKSG  | PROBABLE ISOCITRATE DEHYDROGENASE CAA16247                     | -0,327528003  |
| NGISMSEVVPIDVSV  | YP_177963; PPE FAMILY PROTEIN                                  | -0,327950001  |
| EFTPKTQLTMLSARA  | MCE-FAMILY PROTEIN MCE1AYP_177701                              | -0,327984684  |
| PVLPPEINSVLMYSG  | YP_177963; PPE FAMILY PROTEIN                                  | -0,328010466  |
| AVEEASDTAAANQLM  | CAE55371.1; PPE FAMILY PROTEIN                                 | -0,328030119  |
| LAKETATQARAAAEA  | PPE FAMILY PROTEIN CAE55334                                    | -0,328633073  |
| EIVCSKYPDSQVGTA  | PERIPLASMIC PHOSPHATE-BINDING LIPOPROTEIN PSTS3 YP_177768      | -0,32914225   |
| TQIAERVGISQMHVS  | ALTERNATE RNA POLYMERASE SIGMA FACTOR SIGF CAB07069            | -0,329307937  |
| ALSLGLPPPWPQPAL  | PPE FAMILY PROTEIN CAE55504                                    | -0,329734964  |
| IVDAGDRVEAGQVIA  | RNA POLYMERASE BETA-SUBUNIT AAA21416                           | -0,329747237  |
| TIFPGGFTIDPLPLS  | YP_177963; PPE FAMILY PROTEIN                                  | -0,330227401  |
| HGTVLLAVRGLRMGT  | MYCOBACTERIUM BOVIS MYCOCEROSIC ACID SYNTHASE GENE; M95808     | -0,330287571  |
| VIWTRLFGVRLVKLL  | POSSIBLE GLYCOSYL TRANSFERASE CAB05415                         | -0,330769481  |
| GARAGGGLSGVLRVP  | CAE55371.1; PPE FAMILY PROTEIN                                 | -0,330862773  |
| TVFKLTADGVLTAPQ  | MYCOBACTERIUM BOVIS MYCOCEROSIC ACID SYNTHASE GENE; M95808     | -0,33098188   |
| EYVVAFLGALQAGRI  | MYCOBACTERIUM BOVIS ACYL-COA SYNTHASE GENE; U75685             | -0,331175009  |
| SLTALSAGVGAVAMS  | LOW MOLECULAR WEIGHT T-CELL ANTIGEN TB8.4 NP_215690            | -0,331387365  |
| YGSFRRSFRLPAHVT  | CAA17343.1; HEAT SHOCK PROTEIN HSP                             | -0,332068636  |
| SEGGCWRTFLTCDAN  | MYCOBACTERIUM BOVIS MYCOCEROSIC ACID SYNTHASE GENE; M95808     | -0,332130677  |
| GHAGDMAGYAGTLQS  | CAA17363.1; LOW MOLECULAR WEIGHT PROTEIN ANTIGEN 7 ESXH        | -0,332219395  |
| RELTEVQGEVVDIGG  | PROBABLE ISOCITRATE DEHYDROGENASE CAA16247                     | -0,33258598   |
| TPVFDGAQEAELQGL  | RNA POLYMERASE BETA-SUBUNIT AAA21416                           | -0,332853232  |
| RCWPRSRCPRRS GSS | MYCOBACTERIUM BOVIS MYCOCEROSIC ACID SYNTHASE GENE; M95808     | -0,333020086  |
| NMQRQAVPLVRSEAP  | RNA POLYMERASE BETA-SUBUNIT AAA21416                           | -0,333035859  |

| Peptides         | Protein                                                                      | Average Index |
|------------------|------------------------------------------------------------------------------|---------------|
| AFGRFPIIDDERPQL  | MYCOBACTERIUM BOVIS MYCOCEROSIC ACID SYNTHASE GENE; M95808                   | -0,333189048  |
| FGNLLSFASLPTVGQ  | CAB06237.1; CONSERVED HYPOTHETICAL PROTEIN                                   | -0,333374737  |
| EPNFMDLKEAARKLE  | MTB48 AAK31576                                                               | -0,333474886  |
| AVRNAKAAVEEGIVA  | 60 kDa chaperonin 2 P0A521                                                   | -0,333727446  |
| ASVTTLGLAGDAWHGP | PPE FAMILY PROTEIN CAE55504                                                  | -0,333828184  |
| SGIPTLSTTGPVHAV  | YP_177963; PPE FAMILY PROTEIN                                                | -0,33417148   |
| ATFLETSPQFFPFTG  | PPE FAMILY PROTEIN CAE55504                                                  | -0,334250261  |
| REPIVISNVPRLVPG  | CAA17111.1; PROBABLE ISOCITRATE DEHYDROGENASE                                | -0,334406098  |
| ALPEVGDGGEAGSWLL | MYCOBACTERIUM BOVIS MYCOCEROSIC ACID SYNTHASE GENE; M95808                   | -0,334421515  |
| VIPPTLNLVNLDP EI | 3-OXOACYL-[ACYL-CARRIER PROTEIN] SYNTHASE 2 KASB CAA94642                    | -0,334506866  |
| SFSDPRFDDVKAPVD  | RNA POLYMERASE BETA-SUBUNIT AAA21416                                         | -0,334512898  |
| ANRSRLMSLVAANIL  | PPE FAMILY PROTEIN CAE55334                                                  | -0,33451464   |
| MLSSTSSDALRQTAR  | MYCOBACTERIUM BOVIS MYCOCEROSIC ACID SYNTHASE GENE; M95808                   | -0,334621348  |
| GTAIPISVGPITISP  | YP_177963; PPE FAMILY PROTEIN                                                | -0,334658107  |
| LTQSPIINLGLADVG  | YP_177963; PPE FAMILY PROTEIN                                                | -0,334898689  |
| GWWNQAH TALAGAGS | YP_177963; PPE FAMILY PROTEIN                                                | -0,335469864  |
| RRCRRALRQIGVLER  | CAA16102.1; ESAT-6 LIKE PROTEIN ESXQ                                         | -0,335607625  |
| EIQ LAVQATPTFSSS | PPE FAMILY PROTEIN CAE55334                                                  | -0,335608403  |
| ATLGSSGGKNLLQVV  | POSSIBLE GLYCOSYL TRANSFERASE CAB05418                                       | -0,335797932  |
| VDEAGTVYVTEHNTN  | TRANSMEMBRANE SERINE/THREONINE-PROTEIN KINASE D PKND NP_215446               | -0,335931754  |
| NISVPDSSVPIIIVP  | YP_177963; PPE FAMILY PROTEIN                                                | -0,336253955  |
| LPGTDIDPDSFWAGV  | MTB81 (publication)                                                          | -0,336316982  |
| AGSNNQTVLPFDGLN  | TRANSMEMBRANE SERINE/THREONINE-PROTEIN KINASE D PKND NP_215446               | -0,337112845  |
| TNTLSSMLKGFAPAA  | CAE55371.1; PPE FAMILY PROTEIN                                               | -0,337553428  |
| FVAAAANKVNTLLDVA | CONSERVED HYPOTHETICAL PROTEIN TB9.8 CAD93159                                | -0,337646121  |
| RVATAGEPNFMDLKE  | MTB48 AAK31576                                                               | -0,337759664  |
| TGKIYFDVTGPSPTI  | CAB06500.1; IMMUNOGENIC PROTEIN MPT63                                        | -0,337810722  |
| GSRFLLDQAITSAGR  | CAB01474.1; CONSERVED HYPOTHETICAL PROTEIN CFP17                             | -0,338386739  |
| PGGLNIPQNAIPLTI  | YP_177963; PPE FAMILY PROTEIN                                                | -0,338566127  |
| HGVPRRMNIGQILET  | RNA POLYMERASE BETA-SUBUNIT AAA21416                                         | -0,339219125  |
| MTDMNPDIKDTSD    | CAB01474.1; CONSERVED HYPOTHETICAL PROTEIN CFP17                             | -0,339292928  |
| LHAVDQQLQRRDRPW  | MYCOBACTERIUM BOVIS MYCOCEROSIC ACID SYNTHASE GENE; M95808                   | -0,340075892  |
| RPTQPGSYPIVLATY  | PERIPLASMIC PHOSPHATE-BINDING LIPOPROTEIN PSTS2 YP_177769                    | -0,34018939   |
| KGETELTPEERLLRA  | RNA POLYMERASE BETA-SUBUNIT AAA21416                                         | -0,340797122  |
| NNQTVLPFDGLNYPE  | TRANSMEMBRANE SERINE/THREONINE-PROTEIN KINASE D PKND NP_215446               | -0,341183765  |
| MIRAQAASLEAEHQ A | PUTATIVE ESAT-6 LIKE PROTEIN ESXN YP_177838                                  | -0,341341983  |
| TSDEVTVETTSVFRA  | CAB01474.1; CONSERVED HYPOTHETICAL PROTEIN CFP17                             | -0,341650394  |
| MRLSLTALSAGVGAV  | LOW MOLECULAR WEIGHT T-CELL ANTIGEN TB8.4 NP_215690                          | -0,341694982  |
| PALAKGLSTHEGALL  | SECRETED L-ALANINE DEHYDROGENASE ALD CAA15575                                | -0,341708479  |
| STAYLQYTSGST RTP | MYCOBACTERIUM BOVIS ACYL-COA SYNTHASE GENE; U75685                           | -0,341749171  |
| GTIRNILGGTIFREP  | CAA17111.1; PROBABLE ISOCITRATE DEHYDROGENASE                                | -0,341759277  |
| EVADGDALYDAAVGH  | MYCOBACTERIUM BOVIS MYCOCEROSIC ACID SYNTHASE GENE; M95808                   | -0,341881652  |
| GRCHSFADADG FVR  | MYCOBACTERIUM BOVIS MYCOCEROSIC ACID SYNTHASE GENE; M95808                   | -0,342107622  |
| CAPVFVMAAPGQPLP  | CAA16030.1; PROBABLE MOLYBDOPTERIN-GUANINE DINUCLEOTIDE BIOSYNTHESIS PROTEIN | -0,343048718  |
| LPNISASVPQLVAAI  | PROBABLE ISOCITRATE DEHYDROGENASE CAA16247                                   | -0,34305481   |
| LTSILTYHV VAGQTS | CAA98373.1; MAJOR SECRETED IMMUNOGENIC PROTEIN                               | -0,343123153  |
| SMTNSGVSMNTNLSS  | CAE55371.1; PPE FAMILY PROTEIN                                               | -0,343334245  |
| AAIDAATSSSQESGV  | RNA POLYMERASE BETA-SUBUNIT AAA21416                                         | -0,343341049  |
| TGASLAPYNHMEVGS  | MCE-FAMILY PROTEIN MCE1AYP_177701                                            | -0,343972889  |
| GDQYRATNFKVDQPG  | CAA17111.1; PROBABLE ISOCITRATE DEHYDROGENASE                                | -0,34397389   |
| TYRLAPKSGSTEVTY  | CONSERVED HYPOTHETICAL PROTEIN TB16.3CAD97060                                | -0,344394443  |
| NALAE LPTVIAATA  | POSSIBLE GLYCOSYL TRANSFERASE CAB05415                                       | -0,344671757  |
| MAAIATFAAPVALAA  | CAB06500.1; IMMUNOGENIC PROTEIN MPT63                                        | -0,344713219  |

| Peptides         | Protein                                                                      | Average Index |
|------------------|------------------------------------------------------------------------------|---------------|
| QQFIYAGSLSALLDP  | CAB10044.1; SECRETED ANTIGEN 85-B FBPB (85B)                                 | -0,344866026  |
| AAARLADAFGRDRVG  | POSSIBLE GLYCOSYL TRANSFERASE CAB05415                                       | -0,344962539  |
| EAEHQAIVRDVLAAAG | PUTATIVE ESAT-6 LIKE PROTEIN ESXN YP_177838                                  | -0,345197586  |
| QRVAGAVMQVISRSE  | POSSIBLE GLYCOSYL TRANSFERASE CAB05415                                       | -0,345209574  |
| ESMLAAAAWDGVAA   | PPE FAMILY PROTEIN CAE55334                                                  | -0,345265072  |
| GAYHLMRTQGGRGVL  | SECRETED L-ALANINE DEHYDROGENASE ALD CAA15575                                | -0,345284329  |
| KVGNEGVTVEESNT   | 60 kDa chaperonin 2 P0A521                                                   | -0,345463035  |
| FEETFEVTAAPVAV   | CAB07109.1; PROBABLE 50S RIBOSOMAL PROTEIN L7/L12 RPLL                       | -0,345655947  |
| LDQVHFQPLPPAVVK  | PERIPLASMIC PHOSPHATE-BINDING LIOPROTEIN PSTS1 YP_177770                     | -0,346498363  |
| RLADAFGRDRVGFPQ  | POSSIBLE GLYCOSYL TRANSFERASE CAB05415                                       | -0,346499995  |
| QSESGIAGAGTGPPT  | TRANSMEMBRANE SERINE/THREONINE-PROTEIN KINASE D PKND NP_215446               | -0,346526352  |
| PSIIDAAIAELRHLN  | YP_177963; PPE FAMILY PROTEIN                                                | -0,346891684  |
| TLPVPVLRDELPLGLG | CAA16030.1; PROBABLE MOLYBDOPTERIN-GUANINE DINUCLEOTIDE BIOSYNTHESIS PROTEIN | -0,346891854  |
| NRDFTLPGERIHHVF  | PERIPLASMIC PHOSPHATE-BINDING LIOPROTEIN PSTS3 YP_177768                     | -0,346966009  |
| NADGELYVIAGDIPL  | YP_177963; PPE FAMILY PROTEIN                                                | -0,347630923  |
| RQLDAEFCGRIHTRY  | SECRETED L-ALANINE DEHYDROGENASE ALD CAA15575                                | -0,348003823  |
| EAPMADPPTDVPIPT  | MTB48 AAK31576                                                               | -0,34804104   |
| AITTIMDFEDSVAIV  | MTB81 (publication)                                                          | -0,348201092  |
| VKVIPSRGAWLEFDV  | RNA POLYMERASE BETA-SUBUNIT AAA21416                                         | -0,348236534  |
| VPVLRDELPLGLPLP  | CAA16030.1; PROBABLE MOLYBDOPTERIN-GUANINE DINUCLEOTIDE BIOSYNTHESIS PROTEIN | -0,348459634  |
| PEVATWLEVPPLPGV  | HYPOTHETICAL PROTEIN RV2623 NP_217139                                        | -0,348621406  |
| SAKVDCCGGKTLKAS  | PERIPLASMIC PHOSPHATE-BINDING LIOPROTEIN PSTS3 YP_177768                     | -0,348796016  |
| VAGLGCSSNKSTTG   | LIOPROTEIN LPQH PRECURSOR P0A5J0                                             | -0,349159758  |
| ATAWYGLNDLAQIKA  | MYCOBACTERIUM BOVIS MYCOCEROSIC ACID SYNTHASE GENE; M95808                   | -0,349479402  |
| MKTDAATLAQEAGNF  | CAA17966.1; 10 KDA CULTURE FILTRATE ANTIGEN ESXB                             | -0,349492673  |
| VAAAGYLVLRPSWSP  | TRANSMEMBRANE SERINE/THREONINE-PROTEIN KINASE D PKND NP_215446               | -0,349742254  |
| ALQASLGHAVPPAGN  | TRANSMEMBRANE SERINE/THREONINE-PROTEIN KINASE D PKND NP_215446               | -0,350231925  |
| LARGRRHRPVRTAVV  | MYCOBACTERIUM BOVIS MYCOCEROSIC ACID SYNTHASE GENE; M95808                   | -0,350570433  |
| GSERVQAATIKRFAD  | MYCOBACTERIUM BOVIS ACYL-COA SYNTHASE GENE; U75685                           | -0,350958305  |
| SHVRLTEEPERHVVQ  | MYCOBACTERIUM BOVIS MYCOCEROSIC ACID SYNTHASE GENE; M95808                   | -0,351032985  |
| SRPQSSNSVPGAP    | RNA POLYMERASE BETA-SUBUNIT AAA21416                                         | -0,351041787  |
| GQYTVFAPTNAAFSK  | CAA98373.1; MAJOR SECRETED IMMUNOGENIC PROTEIN                               | -0,351054462  |
| LGALQAGRIAVPLSV  | MYCOBACTERIUM BOVIS ACYL-COA SYNTHASE GENE; U75685                           | -0,351074264  |
| RWAARDAELRKIPLT  | HYPOTHETICAL PROTEIN RV2623 NP_217139                                        | -0,351089587  |
| PTPIGELDVIALYIA  | PPE FAMILY PROTEIN CAE55334                                                  | -0,351109001  |
| PVKVTRSALQNAASI  | 60 kDa chaperonin 2 P0A521                                                   | -0,351469193  |
| PPLAGASRTDMEGTF  | 3-OXOACYL-[ACYL-CARRIER PROTEIN] SYNTHASE 2 KASB CAA94642                    | -0,351885436  |
| GLPPGMGNIPLGNAG  | YP_177963; PPE FAMILY PROTEIN                                                | -0,35218738   |
| GEAQLGNSSGNFLLP  | PERIPLASMIC PHOSPHATE-BINDING LIOPROTEIN PSTS1 YP_177770                     | -0,35224665   |
| STLNPQVGSQAQPIVI | PPE FAMILY PROTEIN CAE55334                                                  | -0,352401525  |
| PLGFQVPGSIDAITL  | YP_177963; PPE FAMILY PROTEIN                                                | -0,352532915  |
| GQRCAPVFVMAAPGQ  | CAA16030.1; PROBABLE MOLYBDOPTERIN-GUANINE DINUCLEOTIDE BIOSYNTHESIS PROTEIN | -0,352924106  |
| MSAQAFHQGESSAAF  | CONSERVED HYPOTHETICAL PROTEIN TB9.8 CAD93159                                | -0,352962522  |
| ADLDERGIVRIGAEV  | RNA POLYMERASE BETA-SUBUNIT AAA21416                                         | -0,353002095  |
| QLNPFNVNLKLQFLH  | YP_177963; PPE FAMILY PROTEIN                                                | -0,353464976  |
| GRGCAQYAAQNPTGP  | CAA98350.1; CELL SURFACE LIOPROTEIN MPT83                                    | -0,353551944  |
| VKTYLKDHDTEGLDI  | PROBABLE ISOCITRATE DEHYDROGENASE CAA16247                                   | -0,353761567  |
| VLANGDEVQIGKFRL  | CAB01474.1; CONSERVED HYPOTHETICAL PROTEIN CFP17                             | -0,353767786  |
| TLPPGLTDEQAITAA  | MYCOBACTERIUM BOVIS MYCOCEROSIC ACID SYNTHASE GENE; M95808                   | -0,353831835  |
| VNSSRMYSGPPEISM  | PPE FAMILY PROTEIN CAE55334                                                  | -0,353876864  |

| Peptides         | Protein                                                                | Average Index |
|------------------|------------------------------------------------------------------------|---------------|
| EEHQDCVAASDLAYT  | MYCOBACTERIUM BOVIS MYCOCEROSIC ACID SYNTHASE GENE; M95808             | -0,353898032  |
| SLERMAPLVDRQNAG  | MTB81 (publication)                                                    | -0,353902591  |
| CRRSKLMTRIAGAGA  | MYCOBACTERIUM BOVIS MYCOCEROSIC ACID SYNTHASE GENE; M95808             | -0,354215686  |
| LFVAEAVTLAHVVRP  | POSSIBLE GLYCOSYL TRANSFERASE CAB05415                                 | -0,354438432  |
| TKDGSYKITGTATG   | LIPOPROTEIN LPQH PRECURSOR P0A5J0                                      | -0,354638444  |
| HANGVTHRDVKPENI  | TRANSMEMBRANE SERINE/THREONINE-PROTEIN KINASE D PKND NP_215446         | -0,354679048  |
| AELPGVDPDKVDIM   | CAA17245.1; HEAT SHOCK PROTEIN HSPX                                    | -0,354715248  |
| MADKTTQTIYIDADP  | CONSERVED HYPOTHETICAL PROTEIN TB16.3CAD97060                          | -0,355052463  |
| LHASTTIGPVSLPIF  | YP_177963; PPE FAMILY PROTEIN                                          | -0,355194376  |
| DNSWSVKVPRRLKEL  | ALTERNATE RNA POLYMERASE SIGMA FACTOR SIGF CAB07069                    | -0,355414728  |
| ITIDSVGQTIAGATI  | PERIPLASMIC PHOSPHATE-BINDING LIPOPROTEIN PSTS3 YP_177768              | -0,355453563  |
| CAQYAAQNPTGPGSV  | CAA98350.1; CELL SURFACE LIPOPROTEIN MPT83                             | -0,355622722  |
| TFESITSRMAEINGM  | CAB10947.1; PROBABLE LIPOPROTEIN LPRJ                                  | -0,355721396  |
| ERQILIDNNALGQFT  | PPE FAMILY PROTEIN CAE55489                                            | -0,355808158  |
| WAPDEIREEDNNCQ   | MTB81 (publication)                                                    | -0,356288181  |
| SGIANFGAGVSGLLN  | YP_177963; PPE FAMILY PROTEIN                                          | -0,356558202  |
| RAGAALDYSALYPAG  | MYCOBACTERIUM BOVIS MYCOCEROSIC ACID SYNTHASE GENE; M95808             | -0,356621496  |
| GLGLSGGTPPFDLPT  | YP_177963; PPE FAMILY PROTEIN                                          | -0,357076033  |
| YSLDVPRITILDAHF  | YP_177963; PPE FAMILY PROTEIN                                          | -0,357641739  |
| DLEKIYFAAYVITS   | RNA POLYMERASE BETA'-SUBUNIT AAA21417                                  | -0,357731967  |
| PSDVIDDASMPAMIR  | PROBABLE ISOCITRATE DEHYDROGENASE CAA16247                             | -0,357931838  |
| GLPSNMDQHLNMEAL  | POSSIBLE GLYCOSYL TRANSFERASE CAB05418                                 | -0,358440275  |
| VDGVVSDEIVYLTAD  | RNA POLYMERASE BETA-SUBUNIT AAA21416                                   | -0,358596787  |
| SALLDPSQGMGPSLI  | CAB10044.1; SECRETED ANTIGEN 85-B FBPB (85B)                           | -0,358711522  |
| LGYRNWLGLNKGDLA  | MTB81 (publication)                                                    | -0,35874932   |
| FLAEKTVKKNYVSRLL | TWO COMPONENT TRANSCRIPTIONAL REGULATORY PROTEIN DEVR NP_217649        | -0,358853774  |
| IGKFRVLFLTGPQKG  | CAB01474.1; CONSERVED HYPOTHETICAL PROTEIN CFP17                       | -0,358863349  |
| GFGNSTELPSSGFFN  | YP_177963; PPE FAMILY PROTEIN                                          | -0,359044188  |
| RHATAALRAAEDDCP  | MYCOBACTERIUM BOVIS MYCOCEROSIC ACID SYNTHASE GENE; M95808             | -0,359575751  |
| SPHPLLTHAVEQTGR  | MYCOBACTERIUM BOVIS MYCOCEROSIC ACID SYNTHASE GENE; M95808             | -0,359715398  |
| LFNVGGFNTGVANVG  | YP_177963; PPE FAMILY PROTEIN                                          | -0,360959025  |
| TSVAGDPGPDAGTST  | POSSIBLE GLYCOSYL TRANSFERASE CAB05418                                 | -0,361109083  |
| TINAQQAELDSALLA  | MCE-FAMILY PROTEIN MCE1AYP_177701                                      | -0,361502473  |
| VSGGLGLEAKDLVDG  | CAB07109.1; PROBABLE 50S RIBOSOMAL PROTEIN L7/L12 RPLL                 | -0,361642332  |
| WSFAQAQHLMANIV   | PERIPLASMIC PHOSPHATE-BINDING LIPOPROTEIN PSTS3 YP_177768              | -0,361740648  |
| IDIDGQIDGFSTPPI  | YP_177963; PPE FAMILY PROTEIN                                          | -0,361846408  |
| GVETRIEAVPIAGFA  | 3-OXOACYL-[ACYL-CARRIER PROTEIN] SYNTHASE 2 KASB CAA94642              | -0,362018143  |
| PRLFVVTRQAQIVKP  | MYCOBACTERIUM BOVIS MYCOCEROSIC ACID SYNTHASE GENE; M95808             | -0,36222258   |
| AGCGRIVLTARSQPN  | MYCOBACTERIUM BOVIS MYCOCEROSIC ACID SYNTHASE GENE; M95808             | -0,362235669  |
| VSARNTAVCAPTTGV  | CAE55335.1; PE FAMILY PROTEIN                                          | -0,362618944  |
| AAIANRLLRRRTATHL | PUTATIVE CYCLOPROPANE-FATTY-ACYL-PHOSPHOLIPID SYNTHASE UFAA1 NP_854118 | -0,362713043  |
| DIMVRDGLQTIKAER  | CAA17245.1; HEAT SHOCK PROTEIN HSPX                                    | -0,363007331  |
| VATGEVLLTENVEAG  | PROBABLE ISOCITRATE DEHYDROGENASE CAA16247                             | -0,363148876  |
| EKEKASVPGGGDMGG  | 60 kDa chaperonin 2 P0A521                                             | -0,363170557  |
| SLGSSGLGGGVAANL  | CAE55371.1; PPE FAMILY PROTEIN                                         | -0,363239444  |
| HLMRTQGGRGVLMGG  | SECRETED L-ALANINE DEHYDROGENASE ALD CAA15575                          | -0,363726838  |
| DVGSLNGTYVNPPEV  | CAB01474.1; CONSERVED HYPOTHETICAL PROTEIN CFP17                       | -0,363889466  |
| VQFVKAICSPMALAS  | HYPOTHETICAL PROTEIN RV2626C NP_217142                                 | -0,364136297  |
| TKIDGVGYPVHKPVT  | CONSERVED HYPOTHETICAL PROTEIN CAB08634                                | -0,364328521  |
| YQPQGLAVDGAGTVY  | TRANSMEMBRANE SERINE/THREONINE-PROTEIN KINASE D PKND NP_215446         | -0,364504103  |
| LPDELLEAHANAIVS  | RNA POLYMERASE BETA-SUBUNIT AAA21416                                   | -0,365080015  |

| Peptides         | Protein                                                                      | Average Index |
|------------------|------------------------------------------------------------------------------|---------------|
| YIASIATGSIALAIT  | PPE FAMILY PROTEIN CAE55334                                                  | -0,365328096  |
| SMSEVVPIDVSVDP   | YP_177963; PPE FAMILY PROTEIN                                                | -0,365533737  |
| QSSSNNSVPGAPNRV  | RNA POLYMERASE BETA-SUBUNIT AAA21416                                         | -0,366004643  |
| YSIEITGSTLVDINE  | YP_177963; PPE FAMILY PROTEIN                                                | -0,366139089  |
| VAAICHYIAMWVVF   | POSSIBLE HEMOLYSIN-LIKE PROTEIN CAA17201                                     | -0,366306408  |
| SASIGTLGFTIPGFT  | YP_177963; PPE FAMILY PROTEIN                                                | -0,36631177   |
| NNTGEIKSQTVFMGD  | RNA POLYMERASE BETA-SUBUNIT AAA21416                                         | -0,366333734  |
| LPLPNIPLLLEYAARF | PPE FAMILY PROTEIN CAE55504                                                  | -0,367427651  |
| WLEFDVDKRDVTGVR  | RNA POLYMERASE BETA-SUBUNIT AAA21416                                         | -0,367677518  |
| TARTINAQQAELDSA  | MCE-FAMILY PROTEIN MCE1AYP_177701                                            | -0,367962356  |
| GTAFLRVLNRDRNYT  | MTB81 (publication)                                                          | -0,368543139  |
| KVLTEYNKAALPEV   | MTB48 AAK31576                                                               | -0,368810809  |
| LGYNNAVAGAGTGIVI | CAB09453.1; PROBABLE SERINE PROTEASE PEPA                                    | -0,368863491  |
| CFEGSRPTTYDHPTF  | SECRETED L-ALANINE DEHYDROGENASE ALD CAA15575                                | -0,368971602  |
| AVSEGKPTKEHIQIR  | CAA17245.1; HEAT SHOCK PROTEIN HSPX                                          | -0,369063093  |
| VASPQSTVIGGTS    | MYCOBACTERIUM BOVIS MYCOCEROSIC ACID SYNTHASE GENE; M95808                   | -0,369181887  |
| TTSEQHQATTILRRG  | TRANSMEMBRANE SERINE/THREONINE-PROTEIN KINASE D PKND NP_215446               | -0,369200718  |
| VKKFEETFEVTAAP   | CAB07109.1; PROBABLE 50S RIBOSOMAL PROTEIN L7/L12 RPLL                       | -0,369274022  |
| ALNGMPAGLLSGMAL  | PPE FAMILY PROTEIN CAE55334                                                  | -0,369300067  |
| AFELAARRTDDDMA   | MYCOBACTERIUM BOVIS ACYL-COA SYNTHASE GENE; U75685                           | -0,369527572  |
| DVVCGGVSTANATVY  | CAA98373.1; MAJOR SECRETED IMMUNOGENIC PROTEIN                               | -0,369813738  |
| DSVMPHPQQAPVLVG  | HYPOTHETICAL PROTEIN RV2623 NP_217139                                        | -0,36993164   |
| NIAVHYDLSNDLFAA  | PUTATIVE CYCLOPROPANE-FATTY-ACYL-PHOSPHOLIPID SYNTHASE UFAA1 NP_854118       | -0,369987933  |
| TQVLVPRSAIDSMILA | CAA98382.1; IMMUNOGENIC PROTEIN MPT64                                        | -0,370140033  |
| YRTDLADRVDTLVGA  | CAA16030.1; PROBABLE MOLYBDOPTERIN-GUANINE DINUCLEOTIDE BIOSYNTHESIS PROTEIN | -0,370188357  |
| FSVSGSGQTYGVDVVG | CAB09453.1; PROBABLE SERINE PROTEASE PEPA                                    | -0,370331089  |
| EPPERHVWQGDVGT   | MYCOBACTERIUM BOVIS MYCOCEROSIC ACID SYNTHASE GENE; M95808                   | -0,370333562  |
| HRRRREFKARAAEKP  | MTB81 (publication)                                                          | -0,370460667  |
| DAYLSEGDMAAHKG   | PERIPLASMIC PHOSPHATE-BINDING LIPOPROTEIN PSTS1 YP_177770                    | -0,370623428  |
| QSDTVAQGYGSLGLM  | CAA17111.1; PROBABLE ISOCITRATE DEHYDROGENASE                                | -0,370796472  |
| TIFPNGISIPNNPLA  | YP_177963; PPE FAMILY PROTEIN                                                | -0,370973558  |
| VITSADVRASLERMA  | MTB81 (publication)                                                          | -0,371089175  |
| PLTLVHAVSPEVATW  | HYPOTHETICAL PROTEIN RV2623 NP_217139                                        | -0,371139634  |
| SRMAEINGMSRDMAS  | CAB10947.1; PROBABLE LIPOPROTEIN LPRJ                                        | -0,371310398  |
| AAAILVLAIVAAAGY  | TRANSMEMBRANE SERINE/THREONINE-PROTEIN KINASE D PKND NP_215446               | -0,371438802  |
| VGALSVPHSWTTAAP  | PPE FAMILY PROTEIN CAE55334                                                  | -0,373024295  |
| QLLASEPVFAATIAK  | MYCOBACTERIUM BOVIS MYCOCEROSIC ACID SYNTHASE GENE; M95808                   | -0,37303527   |
| MGHSTASAGTVGLIK  | MYCOBACTERIUM BOVIS MYCOCEROSIC ACID SYNTHASE GENE; M95808                   | -0,373205154  |
| IGISLLSPLALATNG  | MCE-FAMILY PROTEIN MCE1AYP_177701                                            | -0,373269108  |
| WYGLNDLAQIKAGDK  | MYCOBACTERIUM BOVIS MYCOCEROSIC ACID SYNTHASE GENE; M95808                   | -0,374049546  |
| AATQAAGAGAVADAQ  | PPE FAMILY PROTEIN CAE55334                                                  | -0,374195392  |
| NQNTVLDAIQTDAAI  | CAA17582.1; PROBABLE SERINE PROTEASE PEPD                                    | -0,374198994  |
| NWLRHGVITSADVRA  | MTB81 (publication)                                                          | -0,374387602  |
| ITPCELTAANKAAQQ  | MTB48 AAK31576                                                               | -0,374471654  |
| KGSGTEVTYELAVDL  | CONSERVED HYPOTHETICAL PROTEIN TB16.3CAD97060                                | -0,374818527  |
| FNSGTGNIGFFNSGT  | YP_177963; PPE FAMILY PROTEIN                                                | -0,37525351   |
| VRAMSSLGSSLGSSG  | CAE55371.1; PPE FAMILY PROTEIN                                               | -0,375482339  |
| MKIGIMDEERRTTVN  | MTB81 (publication)                                                          | -0,375620018  |
| VKRADLVIGAVLVPG  | SECRETED L-ALANINE DEHYDROGENASE ALD CAA15575                                | -0,375649944  |
| ARLFIDDDGQEQRQAQ | MYCOBACTERIUM BOVIS MYCOCEROSIC ACID SYNTHASE GENE; M95808                   | -0,376055083  |
| LLSALGITGQFRFGP  | YP_177963; PPE FAMILY PROTEIN                                                | -0,37612178   |
| GRSGEPFPYPTVGY   | RNA POLYMERASE BETA-SUBUNIT AAA21416                                         | -0,376644125  |
| LNNAGVNYGDPVDAK  | CONSERVED HYPOTHETICAL PROTEIN CAA15739                                      | -0,376717107  |
| LVLADNMREYLAAG   | MTB48 AAK31576                                                               | -0,377081398  |

| Peptides         | Protein                                                                      | Average Index |
|------------------|------------------------------------------------------------------------------|---------------|
| AAGQAAQAAGQARLA  | PPE FAMILY PROTEIN CAE55504                                                  | -0,377163617  |
| SDGSGVTPGTGMPAA  | MTB48 AAK31576                                                               | -0,377317675  |
| SGSMSLSFSDPRFDD  | RNA POLYMERASE BETA-SUBUNIT AAA21416                                         | -0,377458332  |
| DFKAAGAQLVGTADQ  | SECRETED L-ALANINE DEHYDROGENASE ALD CAA15575                                | -0,377521305  |
| SSHGLSVADLVLVAP  | MYCOBACTERIUM BOVIS ACYL-COA SYNTHASE GENE; U75685                           | -0,377774476  |
| VGSWIGSSAGLMVAA  | CAE55371.1; PPE FAMILY PROTEIN                                               | -0,377827754  |
| TEADIARHLPEHAIV  | HYPOTHETICAL PROTEIN RV2626C NP_217142                                       | -0,378244231  |
| NVTGGGATTGQASAK  | PERIPLASMIC PHOSPHATE-BINDING LIOPROTEIN PSTS3 YP_177768                     | -0,378341873  |
| AGVNELVRVYVAQKR  | RNA POLYMERASE BETA-SUBUNIT AAA21416                                         | -0,378662298  |
| SSGLGGGVAAANLGRA | CAE55371.1; PPE FAMILY PROTEIN                                               | -0,378734019  |
| AFNTPALNIHQIPLG  | YP_177963; PPE FAMILY PROTEIN                                                | -0,378916412  |
| VPAARPDVAVL DVRL | TWO COMPONENT TRANSCRIPTIONAL REGULATORY PROTEIN DEVR NP_217649              | -0,379812346  |
| YYVDANASIQEMLNV  | HYPOTHETICAL PROTEIN RV2626C NP_217142                                       | -0,379847458  |
| DYSALYPAGRLVDAP  | MYCOBACTERIUM BOVIS MYCOCEROSIC ACID SYNTHASE GENE; M95808                   | -0,38038202   |
| NFAGIEAAASAIQGN  | CAE55648                                                                     | -0,38055098   |
| RWEQRDVMAREVAVD  | MYCOBACTERIUM BOVIS MYCOCEROSIC ACID SYNTHASE GENE; M95808                   | -0,380597166  |
| FVASDRVPPGPGQIE  | MYCOBACTERIUM BOVIS MYCOCEROSIC ACID SYNTHASE GENE; M95808                   | -0,380647286  |
| RVFADVSPHLLTHA   | MYCOBACTERIUM BOVIS MYCOCEROSIC ACID SYNTHASE GENE; M95808                   | -0,381164884  |
| EDFSGSMSLSFSDPR  | RNA POLYMERASE BETA-SUBUNIT AAA21416                                         | -0,38130597   |
| DGAYWVDNLRNTVQF  | MYCOBACTERIUM BOVIS MYCOCEROSIC ACID SYNTHASE GENE; M95808                   | -0,381349609  |
| PAFSPPAALGGGVG   | YP_177963; PPE FAMILY PROTEIN                                                | -0,381436041  |
| IVLVAIVAAGYLV    | TRANSMEMBRANE SERINE/THREONINE-PROTEIN KINASE D PKND NP_215446               | -0,381993108  |
| DEERTTVNLKACIK   | MTB81 (publication)                                                          | -0,382081899  |
| QTFTSIAISMYCPSV  | CONSERVED HYPOTHETICAL PROTEIN CAA15739                                      | -0,382136841  |
| ARAGLVMDPGSKVTY  | MCE-FAMILY PROTEIN MCE1AYP_177701                                            | -0,382195289  |
| AAAGAAPAGAAVEAA  | CAB07109.1; PROBABLE 50S RIBOSOMAL PROTEIN L7/L12 RPLL                       | -0,382230581  |
| VVAPGGTFESITSRM  | CAB10947.1; PROBABLE LIOPROTEIN LPRJ                                         | -0,382238284  |
| TRINQSFVTVNWST   | YP_177963; PPE FAMILY PROTEIN                                                | -0,382510616  |
| AILSLRHGVVPLLH   | MYCOBACTERIUM BOVIS MYCOCEROSIC ACID SYNTHASE GENE; M95808                   | -0,38252194   |
| FGGRFVEIGKADVYG  | MYCOBACTERIUM BOVIS MYCOCEROSIC ACID SYNTHASE GENE; M95808                   | -0,383573024  |
| QAHAALAGAGSVLN   | YP_177963; PPE FAMILY PROTEIN                                                | -0,383617308  |
| DEDELPAGVNELVRV  | RNA POLYMERASE BETA-SUBUNIT AAA21416                                         | -0,383726058  |
| LADLIQPDRLVLEL   | PPE FAMILY PROTEIN CAE55504                                                  | -0,383757447  |
| GAHQGGGGAKSKGS   | MTB48 AAK31576                                                               | -0,383859556  |
| ACPGQTLNYTANGSG  | PERIPLASMIC PHOSPHATE-BINDING LIOPROTEIN PSTS3 YP_177768                     | -0,38414471   |
| AAATPYVGWLAATAA  | PPE FAMILY PROTEIN CAE55334                                                  | -0,384199268  |
| YDITALLQAPHAVN   | MYCOBACTERIUM BOVIS MYCOCEROSIC ACID SYNTHASE GENE; M95808                   | -0,384359664  |
| GQMGARAGGGLSGVL  | CAE55371.1; PPE FAMILY PROTEIN                                               | -0,384814855  |
| CSKYPDATTGTAVRA  | PERIPLASMIC PHOSPHATE-BINDING LIOPROTEIN PSTS2 YP_177769                     | -0,384819464  |
| PGVDPKDQDVMVRD   | CAA17245.1; HEAT SHOCK PROTEIN HSPX                                          | -0,3848777    |
| WAQELAAQTDDQQLA  | PROBABLE ISOCITRATE DEHYDROGENASE CAA16247                                   | -0,384957443  |
| RPAVYAPKSALGHVS  | 3-OXOACYL-[ACYL-CARRIER PROTEIN] SYNTHASE 2 KASB CAA94642                    | -0,385398727  |
| IVGLERLYAENPSAR  | MTB48 AAK31576                                                               | -0,385451324  |
| TAVVLLCCSGVATAA  | CAA98382.1; IMMUNOGENIC PROTEIN MPT64                                        | -0,386321556  |
| GMLAIGAVTIAVVS   | CAA17582.1; PROBABLE SERINE PROTEASE PEPD                                    | -0,386420454  |
| MAEMKTDAAATLAQEA | CAA17966.1; 10 KDA CULTURE FILTRATE ANTIGEN ESXB                             | -0,386618415  |
| VGAGERKMSALVDAS  | CAA16030.1; PROBABLE MOLYBDOPTERIN-GUANINE DINUCLEOTIDE BIOSYNTHESIS PROTEIN | -0,386856538  |
| QNQALLNARDELQAQ  | MTB81 (publication)                                                          | -0,386918498  |
| GIGGAAASLVGFNRA  | CAA17582.1; PROBABLE SERINE PROTEASE PEPD                                    | -0,387015973  |
| DSIAFLAAQELILSG  | MTB81 (publication)                                                          | -0,387021902  |

| Peptides         | Protein                                                                | Average Index |
|------------------|------------------------------------------------------------------------|---------------|
| EPRRCWPRSRCPRRS  | MYCOBACTERIUM BOVIS MYCOCEROSIC ACID SYNTHASE GENE; M95808             | -0,387130363  |
| DPDKVDVIMVRDQQL  | CAA17245.1; HEAT SHOCK PROTEIN HSPX                                    | -0,387628053  |
| IAGATISGVGNDLVL  | PERIPLASMIC PHOSPHATE-BINDING LIPOPROTEIN PSTS3 YP_177768              | -0,387631856  |
| ADGTPVDIILNTHGV  | RNA POLYMERASE BETA-SUBUNIT AAA21416                                   | -0,38809775   |
| QALNSGTDLPPTPIS  | PERIPLASMIC PHOSPHATE-BINDING LIPOPROTEIN PSTS2 YP_177769              | -0,388284407  |
| LTEEQRVPDNLAEGL  | PROBABLE ISOCITRATE DEHYDROGENASE CAA16247                             | -0,388563908  |
| AAEALTGLGDKFGES  | MCE-FAMILY PROTEIN MCE1AYP_177701                                      | -0,388608871  |
| SGTGNFGLFNSGSFN  | YP_177963; PPE FAMILY PROTEIN                                          | -0,388719251  |
| QSGLSIVMPVGGQSS  | CAB10044.1; SECRETED ANTIGEN 85-B FBPB (85B)                           | -0,388783081  |
| TGTATGVDMANPMSP  | LIPOPROTEIN LPQH PRECURSOR P0A5J0                                      | -0,389020101  |
| PFTPPVQGTGPAGPA  | PPE FAMILY PROTEIN CAE55334                                            | -0,389143105  |
| LDDVAGFDAEFFGIS  | MYCOBACTERIUM BOVIS MYCOCEROSIC ACID SYNTHASE GENE; M95808             | -0,389304348  |
| FAAPVALAAYPITGK  | CAB06500.1; IMMUNOGENIC PROTEIN MPT63                                  | -0,389324846  |
| VELKERKHRIEDAVR  | 60 kDa chaperonin 2 P0A521                                             | -0,389416821  |
| QMRIVMSTNNDDPAG  | 3-OXOACYL-[ACYL-CARRIER PROTEIN] SYNTHASE 2 KASB CAA94642              | -0,389864422  |
| FNNRVVTLAAGSNNQ  | TRANSMEMBRANE SERINE/THREONINE-PROTEIN KINASE D PKND NP_215446         | -0,389893015  |
| SKIESLPASQRDEII  | PROBABLE ISOCITRATE DEHYDROGENASE CAA16247                             | -0,390033974  |
| LGNHVSIGVSDGLLA  | YP_177963; PPE FAMILY PROTEIN                                          | -0,390057084  |
| MNCRAVADHLTRLVD  | CONSERVED HYPOTHETICAL PROTEIN CAB08634                                | -0,390124381  |
| TCGDFELVLVDGGST  | POSSIBLE GLYCOSYL TRANSFERASE CAB05419                                 | -0,390164586  |
| RPGSYPIVLATYIEIV | PERIPLASMIC PHOSPHATE-BINDING LIPOPROTEIN PSTS3 YP_177768              | -0,39079239   |
| MAMRALAMSNLLGQN  | YP_177963; PPE FAMILY PROTEIN                                          | -0,391180819  |
| NIISGIPTLSTTGPV  | YP_177963; PPE FAMILY PROTEIN                                          | -0,391252519  |
| LVLNALAELPVTVIA  | POSSIBLE GLYCOSYL TRANSFERASE CAB05415                                 | -0,391459824  |
| EAHANAIIVSTPVFDG | RNA POLYMERASE BETA-SUBUNIT AAA21416                                   | -0,391673872  |
| TPSPGTPEGPWLR TG | MYCOBACTERIUM BOVIS ACYL-COA SYNTHASE GENE; U75685                     | -0,391819545  |
| PAIHIDFDGAADAGF  | YP_177963; PPE FAMILY PROTEIN                                          | -0,392178151  |
| AALVGALSVPHSWTT  | PPE FAMILY PROTEIN CAE55334                                            | -0,392348579  |
| ASTGQRSRGPSPKFRM | MYCOBACTERIUM BOVIS MYCOCEROSIC ACID SYNTHASE GENE; M95808             | -0,392640803  |
| QNAASIAGLFLTTEA  | 60 kDa chaperonin 2 P0A521                                             | -0,392856747  |
| LAQPTQGTTPSSKLG  | CAE55371.1; PPE FAMILY PROTEIN                                         | -0,392927474  |
| AALPAFSPPAQALGG  | YP_177963; PPE FAMILY PROTEIN                                          | -0,392934498  |
| ADVLTKNEDVIVREL  | PROBABLE ISOCITRATE DEHYDROGENASE CAA16247                             | -0,393384193  |
| RKTGELDNRGSQFYI  | PROBABLE ISOCITRATE DEHYDROGENASE CAA16247                             | -0,393608028  |
| AAFQAAHARFVAAAA  | CONSERVED HYPOTHETICAL PROTEIN TB9.8 CAD93159                          | -0,393828697  |
| MKIRLHTLLAVLTAA  | PERIPLASMIC PHOSPHATE-BINDING LIPOPROTEIN PSTS1 YP_177770              | -0,394034246  |
| AAGFGNTTADVFD RG | MCE-FAMILY PROTEIN MCE1AYP_177701                                      | -0,394168358  |
| YHSAASAVATQLAPI  | PPE FAMILY PROTEIN CAE55504                                            | -0,394507413  |
| DRPIIYATLGSSGGK  | POSSIBLE GLYCOSYL TRANSFERASE CAB05418                                 | -0,3949459    |
| ARLGAIKREVT SALS | MYCOBACTERIUM BOVIS ACYL-COA SYNTHASE GENE; U75685                     | -0,394960097  |
| QSGGNNSPAVYLLDG  | CAB10044.1; SECRETED ANTIGEN 85-B FBPB (85B)                           | -0,395416675  |
| TTVARDADMLSELGE  | CONSERVED HYPOTHETICAL PROTEIN CAB08634                                | -0,395796038  |
| AWAGPVVMQLMEAAK  | PPE FAMILY PROTEIN CAE55489                                            | -0,39596761   |
| VLRQGNSDRRAPKAV  | PROBABLE ISOCITRATE DEHYDROGENASE CAA16247                             | -0,396050862  |
| AVQTAAQNGVRAMSS  | CAE55371.1; PPE FAMILY PROTEIN                                         | -0,396080939  |
| DRGGPYLQRGVADLV  | MCE-FAMILY PROTEIN MCE1AYP_177701                                      | -0,396177421  |
| FPANSLNLDV FVGT  | YP_177963; PPE FAMILY PROTEIN                                          | -0,39620904   |
| LVAVSWAVGSAKAGL  | POSSIBLE HEMOLYSIN-LIKE PROTEIN CAA17201                               | -0,396488082  |
| IKDLLIVYGRNHSPD  | MYCOBACTERIUM BOVIS ACYL-COA SYNTHASE GENE; U75685                     | -0,396706422  |
| KVNTLLDVAQANLGE  | CONSERVED HYPOTHETICAL PROTEIN TB9.8 CAD93159                          | -0,396739452  |
| LVEGLREVADGDALY  | MYCOBACTERIUM BOVIS MYCOCEROSIC ACID SYNTHASE GENE; M95808             | -0,39685827   |
| AIMMYCPSVMADVAS  | CONSERVED HYPOTHETICAL PROTEIN CAA15739                                | -0,397228384  |
| DHSRDQARRNIAVHY  | PUTATIVE CYCLOPROPANE-FATTY-ACYL-PHOSPHOLIPID SYNTHASE UFAA1 NP_854118 | -0,397553938  |
| PGIGNIGLNAGSNN   | YP_177963; PPE FAMILY PROTEIN                                          | -0,397626779  |

| Peptides         | Protein                                                                | Average Index |
|------------------|------------------------------------------------------------------------|---------------|
| RTATHLPLRLVYSDG  | PUTATIVE CYCLOPROPANE-FATTY-ACYL-PHOSPHOLIPID SYNTHASE UFAA1 NP_854118 | -0,397890359  |
| RRSPWGEMFASTGQR  | MYCOBACTERIUM BOVIS MYCOCEROSIC ACID SYNTHASE GENE; M95808             | -0,398326295  |
| INIPPTPGIGNTTTTV | YP_177963; PPE FAMILY PROTEIN                                          | -0,398379639  |
| TSAGGDPVAITDSV   | PERIPLASMIC PHOSPHATE-BINDING LIPOPROTEIN PSTS3 YP_177768              | -0,398475338  |
| RQRPRAGMLAIGAVT  | CAA17582.1; PROBABLE SERINE PROTEASE PEPD                              | -0,399130949  |
| EFEGELPRLFVVTRQ  | MYCOBACTERIUM BOVIS MYCOCEROSIC ACID SYNTHASE GENE; M95808             | -0,3994902    |
| GSLALTLPTVTIPTI  | YP_177963; PPE FAMILY PROTEIN                                          | -0,399552718  |
| QGEPVDIGGYYAPDS  | PROBABLE ISOCITRATE DEHYDROGENASE CAA16247                             | -0,399938504  |
| AAHDALTSEQHQAT   | TRANSMEMBRANE SERINE/THREONINE-PROTEIN KINASE D PKND NP_215446         | -0,400021491  |
| LTNNHVIAGATDINA  | CAB09453.1; PROBABLE SERINE PROTEASE PEPA                              | -0,400179594  |
| TYNIKGVSTLNLDGP  | PERIPLASMIC PHOSPHATE-BINDING LIPOPROTEIN PSTS2 YP_177769              | -0,400434598  |
| ELTRRGHEVLQAGA   | SECRETED L-ALANINE DEHYDROGENASE ALD CAA15575                          | -0,400541565  |
| ASQRGLGEAQLGNSS  | PERIPLASMIC PHOSPHATE-BINDING LIPOPROTEIN PSTS1 YP_177770              | -0,400590592  |
| SEVDYMDVSPRQMVS  | RNA POLYMERASE BETA-SUBUNIT AAA21416                                   | -0,400885534  |
| HIDFDGAADAGFTAP  | YP_177963; PPE FAMILY PROTEIN                                          | -0,401103314  |
| FVVTRQAQIVKPHDS  | MYCOBACTERIUM BOVIS MYCOCEROSIC ACID SYNTHASE GENE; M95808             | -0,401460104  |
| MPNGAAAAVGLERHA  | 3-OXOACYL-[ACYL-CARRIER PROTEIN] SYNTHASE 2 KASB CAA94642              | -0,401519604  |
| PKTQLTMLSARAGLV  | MCE-FAMILY PROTEIN MCE1AYP_177701                                      | -0,401639963  |
| YAAQNPTGPGSVAGM  | CAA98350.1; CELL SURFACE LIPOPROTEIN MPT83                             | -0,401680097  |
| LASTLTDALKSHGPQ  | MYCOBACTERIUM BOVIS MYCOCEROSIC ACID SYNTHASE GENE; M95808             | -0,401824233  |
| LARDSIYYVDANASI  | HYPOTHETICAL PROTEIN RV2626C NP_217142                                 | -0,401887493  |
| ELHRAGAALDYSALY  | MYCOBACTERIUM BOVIS MYCOCEROSIC ACID SYNTHASE GENE; M95808             | -0,402080634  |
| SVPGAPNRVSFAKLR  | RNA POLYMERASE BETA-SUBUNIT AAA21416                                   | -0,402569364  |
| VVSQLVRSPPGVYFDE | RNA POLYMERASE BETA-SUBUNIT AAA21416                                   | -0,402761096  |
| DQIDKGDVVVLLESM  | CAB08316.1; BIOTINYLATED PROTEIN TB7.3                                 | -0,40282194   |
| DSDYDREKLQERLAK  | 60 kDa chaperonin 2 P0A521                                             | -0,402906395  |
| EPDDFTITTSVDAE   | MTB81 (publication)                                                    | -0,403233649  |
| GSDVPLNPSTGQPDR  | PERIPLASMIC PHOSPHATE-BINDING LIPOPROTEIN PSTS2 YP_177769              | -0,40328269   |
| PFDGLNYPEGLAVDT  | TRANSMEMBRANE SERINE/THREONINE-PROTEIN KINASE D PKND NP_215446         | -0,403402731  |
| TTVPSSGFFNTGAGG  | YP_177963; PPE FAMILY PROTEIN                                          | -0,403592079  |
| TTPKNPTKRRITPKD  | MCE-FAMILY PROTEIN MCE1AYP_177701                                      | -0,403597922  |
| LRHGQILFTFLHLAA  | SECRETED L-ALANINE DEHYDROGENASE ALD CAA15575                          | -0,404068367  |
| VAAFEAALAATVDPA  | YP_177963; PPE FAMILY PROTEIN                                          | -0,404169637  |
| NRIAPLDGVGALLRY  | CONSERVED HYPOTHETICAL PROTEIN CAB08634                                | -0,404188112  |
| IKVSGPPVELDGDDEM | CAA17111.1; PROBABLE ISOCITRATE DEHYDROGENASE                          | -0,404384206  |
| TLGQPLDWFCLFSSG  | MYCOBACTERIUM BOVIS MYCOCEROSIC ACID SYNTHASE GENE; M95808             | -0,404589033  |
| YHSGASAAAAALPAF  | YP_177963; PPE FAMILY PROTEIN                                          | -0,40466635   |
| AIAVGAALVRDDNRI  | CONSERVED HYPOTHETICAL PROTEIN CAB08634                                | -0,404781523  |
| RVIRPSYGLAEATVY  | MYCOBACTERIUM BOVIS ACYL-COA SYNTHASE GENE; U75685                     | -0,404785503  |
| VFIAGSYTPFALLAL  | POSSIBLE HEMOLYSIN-LIKE PROTEIN CAA17201                               | -0,404947405  |
| VVLKVYQNAAGGTHPT | CAA98382.1; IMMUNOGENIC PROTEIN MPT64                                  | -0,405072488  |
| LAIPGTNWIGQAAEA  | CAB06237.1; CONSERVED HYPOTHETICAL PROTEIN                             | -0,405080621  |
| GNSGVASTGLVNAGG  | YP_177963; PPE FAMILY PROTEIN                                          | -0,405351172  |
| TETLTMPSEDAQVAV  | MYCOBACTERIUM BOVIS MYCOCEROSIC ACID SYNTHASE GENE; M95808             | -0,405394133  |
| RLAGWQERYPNVAIT  | HYPOTHETICAL PROTEIN RV2623 NP_217139                                  | -0,405597171  |
| EKPAPSDRAGDDAAR  | MTB81 (publication)                                                    | -0,405601605  |
| GSAPAASLGISTGDV  | CAB09453.1; PROBABLE SERINE PROTEASE PEPA                              | -0,405840241  |
| QIAATAAISAGDQSI  | 60 kDa chaperonin 2 P0A521                                             | -0,40596474   |
| YSGPGPESMLAAAAA  | PPE FAMILY PROTEIN CAE55334                                            | -0,406054107  |
| NNVPQALQQLAQPTQ  | CAE55371.1; PPE FAMILY PROTEIN                                         | -0,406235147  |

| Peptides         | Protein                                                                   | Average Index |
|------------------|---------------------------------------------------------------------------|---------------|
| DADLLLVKEPIAAE   | SECRETED L-ALANINE DEHYDROGENASE ALD CAA15575                             | -0,406266494  |
| GPILINGVNIPATPG  | YP_177963; PPE FAMILY PROTEIN                                             | -0,406555248  |
| ATVYMIDTVLMPPAQ  | CAA98350.1; CELL SURFACE LIPOPROTEIN MPT83                                | -0,406620127  |
| GTAVRAFMQAAIGPG  | PERIPLASMIC PHOSPHATE-BINDING LIPOPROTEIN PSTS2<br>YP_177769              | -0,406828371  |
| DEFKSRLSTAVNAIA  | PERIPLASMIC PHOSPHATE-BINDING LIPOPROTEIN PSTS3<br>YP_177768              | -0,406877998  |
| TRFVNVFEQACPGQT  | PERIPLASMIC PHOSPHATE-BINDING LIPOPROTEIN PSTS3<br>YP_177768              | -0,407076451  |
| AGMAQDPVATAASNN  | CAA98350.1; CELL SURFACE LIPOPROTEIN MPT83                                | -0,407548144  |
| SSQLLANWLRHGVIT  | MTB81 (publication)                                                       | -0,407565151  |
| TLAATVSPAMVAANR  | PPE FAMILY PROTEIN CAE55504                                               | -0,407946607  |
| TVLLKALGWTSEQIV  | RNA POLYMERASE BETA-SUBUNIT AAA21416                                      | -0,408196943  |
| KLESVVIATVESGKM  | CAA17111.1; PROBABLE ISOCITRATE DEHYDROGENASE                             | -0,408350786  |
| ASITSDFHMOVAPDP  | 3-OXOACYL-[ACYL-CARRIER PROTEIN] SYNTHASE 2 KASB<br>CAA94642              | -0,408378694  |
| PVAGQVWEATATVNA  | CAB06500.1; IMMUNOGENIC PROTEIN MPT63                                     | -0,40858965   |
| MLEMRTHVETETGIR  | MYCOBACTERIUM BOVIS MYCOCEROSIC ACID SYNTHASE GENE;<br>M95808             | -0,408606458  |
| LMDAWAGPVVMQLME  | PPE FAMILY PROTEIN CAE55489                                               | -0,408893635  |
| DGTRTWRTGRQATTL  | CAB10947.1; PROBABLE LIPOPROTEIN LPRJ                                     | -0,409245424  |
| HPMLRRTLIDVDEHT  | MYCOBACTERIUM BOVIS MYCOCEROSIC ACID SYNTHASE GENE;<br>M95808             | -0,409753727  |
| IPVLAEAAGTVSKVA  | CAB08316.1; BIOTINYLATED PROTEIN TB7.3                                    | -0,409795401  |
| NPELTTTLTAALSGQL | CAA98373.1; MAJOR SECRETED IMMUNOGENIC PROTEIN                            | -0,410410214  |
| TGEQVLVNEHLIGPP  | CONSERVED HYPOTHETICAL PROTEIN CAB08634                                   | -0,411145848  |
| TIGQAEQAAMSAQAF  | CONSERVED HYPOTHETICAL PROTEIN TB9.8 CAD93159                             | -0,411472133  |
| VYVTDTDNNRVVKLE  | TRANSMEMBRANE SERINE/THREONINE-PROTEIN KINASE D PKND<br>NP_215446         | -0,411475445  |
| AEAERAPIDAGTAAS  | CAB06237.1; CONSERVED HYPOTHETICAL PROTEIN                                | -0,412014624  |
| FGMSGTNVHAIVEEA  | MYCOBACTERIUM BOVIS MYCOCEROSIC ACID SYNTHASE GENE;<br>M95808             | -0,412770542  |
| AQQTVTGIDKVQPAV  | MYCOBACTERIUM BOVIS MYCOCEROSIC ACID SYNTHASE GENE;<br>M95808             | -0,41286932   |
| FLHLAASRACTDALL  | SECRETED L-ALANINE DEHYDROGENASE ALD CAA15575                             | -0,413051759  |
| MGSVELPAKQVNSEL  | MYCOBACTERIUM BOVIS MYCOCEROSIC ACID SYNTHASE GENE;<br>M95808             | -0,413424063  |
| VDAHGAMIRAQAASL  | PUTATIVE ESAT-6 LIKE PROTEIN ESXN YP_177838                               | -0,4134322    |
| VVAGGAAANAGVPKG  | CAA17582.1; PROBABLE SERINE PROTEASE PEPD                                 | -0,413486051  |
| MYAGPGSASLVAAAQ  | CAE55371.1; PPE FAMILY PROTEIN                                            | -0,413588515  |
| SSSAGADPTALNGMP  | PPE FAMILY PROTEIN CAE55334                                               | -0,413635746  |
| DSIARQTCGDFELVL  | POSSIBLE GLYCOSYL TRANSFERASE CAB05419                                    | -0,413911471  |
| HVLEIGTWGELCIR   | PUTATIVE CYCLOPROPANE-FATTY-ACYL-PHOSPHOLIPID<br>SYNTHASE UFAA1 NP_854118 | -0,414212258  |
| NRDGDVLVDADGKAM  | RNA POLYMERASE BETA-SUBUNIT AAA21416                                      | -0,414585351  |
| GELPRLFVVTRQAQI  | MYCOBACTERIUM BOVIS MYCOCEROSIC ACID SYNTHASE GENE;<br>M95808             | -0,414725045  |
| HQVDVAAVQQGLAGK  | MTB81 (publication)                                                       | -0,415413566  |
| LSKQDPEGWGKSPGF  | PERIPLASMIC PHOSPHATE-BINDING LIPOPROTEIN PSTS1<br>YP_177770              | -0,415549518  |
| TLIDVDEHTDVERVA  | MYCOBACTERIUM BOVIS MYCOCEROSIC ACID SYNTHASE GENE;<br>M95808             | -0,415576062  |
| GTRPGLIPGVIPTMT  | CAA17582.1; PROBABLE SERINE PROTEASE PEPD                                 | -0,415982781  |
| LSTDLLDAFKEMTL   | CAB07109.1; PROBABLE 50S RIBOSOMAL PROTEIN L7/L12 RPLL                    | -0,416184903  |
| QDAGDKDGRTLREIR  | CAA17343.1; HEAT SHOCK PROTEIN HSP                                        | -0,416807267  |
| VDMDVQVTMPVPEPM  | CONSERVED HYPOTHETICAL PROTEIN TB18.5CAD93033                             | -0,416822332  |
| KLRGAAEKQDPLSGL  | TWO COMPONENT TRANSCRIPTIONAL REGULATORY PROTEIN<br>DEVIR NP_217649       | -0,417089478  |
| GGCAVLLEPHACVAA  | MYCOBACTERIUM BOVIS MYCOCEROSIC ACID SYNTHASE GENE;<br>M95808             | -0,417282148  |
| DGYRVFADVSPHPLL  | MYCOBACTERIUM BOVIS MYCOCEROSIC ACID SYNTHASE GENE;<br>M95808             | -0,418263581  |
| TGQANYGFAVPDIPI  | YP_177963; PPE FAMILY PROTEIN                                             | -0,418282976  |
| LTGDNQTGFGLNSG   | YP_177963; PPE FAMILY PROTEIN                                             | -0,418296207  |
| PQALQQLAQPTQGTT  | CAE55371.1; PPE FAMILY PROTEIN                                            | -0,418541005  |

| Peptides          | Protein                                                         | Average Index |
|-------------------|-----------------------------------------------------------------|---------------|
| NWEGDAATACEASLD   | MTB48 AAK31576                                                  | -0,418640305  |
| QGYGSLGLMTSVLMT   | CAA17111.1; PROBABLE ISOCITRATE DEHYDROGENASE                   | -0,418647747  |
| GIDKVQPAVFAVQVA   | MYCOBACTERIUM BOVIS MYCOCEROSIC ACID SYNTHASE GENE; M95808      | -0,4188852    |
| GSKPPSGSPETGAGA   | PERIPLASMIC PHOSPHATE-BINDING LIOPROTEIN PSTS1 YP_177770        | -0,418980292  |
| RSTLEKDNTVGTDEA   | RNA POLYMERASE BETA-SUBUNIT AAA21416                            | -0,419148737  |
| PSQTGHSPA VPNALQ  | TRANSMEMBRANE SERINE/THREONINE-PROTEIN KINASE D PKND NP_215446  | -0,419181098  |
| KAVEKVTTETLLKGAK  | 60 kDa chaperonin 2 P0A521                                      | -0,419252794  |
| ELNGGVGPITVLP IQ  | YP_177963; PPE FAMILY PROTEIN                                   | -0,419270695  |
| GNVDTGALMSGNFSN   | YP_177963; PPE FAMILY PROTEIN                                   | -0,41935669   |
| ISASVPQLVAAIKEL   | PROBABLE ISOCITRATE DEHYDROGENASE CAA16247                      | -0,419603967  |
| GGAATGIAAVLTDGN   | LIOPROTEIN LPQH PRECURSOR P0A5J0                                | -0,419767758  |
| IGIGITGNGQIGFGK   | PPE FAMILY PROTEIN CAE55504                                     | -0,420129536  |
| LKLEGDEATGANIVK   | 60 kDa chaperonin 2 P0A521                                      | -0,420308257  |
| VEERPIVGAPVDALV   | CAB08889.1; IRON-REGULATED CONSERVED HYPOTHETICAL PROTEIN       | -0,420373328  |
| NLNPTTLHFGFTIP    | YP_177963; PPE FAMILY PROTEIN                                   | -0,420584707  |
| ARVLYDFVNNEALPG   | MTB81 (publication)                                             | -0,4207375    |
| LRAAEDDCPPPGYDI   | MYCOBACTERIUM BOVIS MYCOCEROSIC ACID SYNTHASE GENE; M95808      | -0,420833925  |
| AAVGLERHAKAGVMT   | 3-OXOACYL-[ACYL-CARRIER PROTEIN] SYNTHASE 2 KASB CAA94642       | -0,42109619   |
| MDYEQDWGDVAITLT   | MYCOBACTERIUM BOVIS ACYL-COA SYNTHASE GENE; U75685              | -0,421396976  |
| KSLENYIAQTRDKFL   | CAA98382.1; IMMUNOGENIC PROTEIN MPT64                           | -0,421503473  |
| IGVLERPVGDSSDCG   | CAA16102.1; ESAT-6 LIKE PROTEIN ESXQ                            | -0,421716117  |
| AGADPTALNGMPAGL   | PPE FAMILY PROTEIN CAE55334                                     | -0,421802866  |
| SNPALVTRYMHVVVA   | POSSIBLE GLYCOSYL TRANSFERASE CAB05419                          | -0,42184787   |
| AGVVMSSHQNV RVNFE | MYCOBACTERIUM BOVIS ACYL-COA SYNTHASE GENE; U75685              | -0,421893163  |
| ATTLLSALGITGQFR   | YP_177963; PPE FAMILY PROTEIN                                   | -0,421927247  |
| VTQFLNNETDFAGSD   | PERIPLASMIC PHOSPHATE-BINDING LIOPROTEIN PSTS2 YP_177769        | -0,422055431  |
| AEAMARVPAARPDVA   | TWO COMPONENT TRANSCRIPTIONAL REGULATORY PROTEIN DEVR NP_217649 | -0,422354135  |
| ETATQARAAAEAFGT   | PPE FAMILY PROTEIN CAE55334                                     | -0,422458034  |
| VGP GCAEYAAANPTG  | CAA98373.1; MAJOR SECRETED IMMUNOGENIC PROTEIN                  | -0,422632379  |
| GVTNLHTAIMAQLAA   | PPE FAMILY PROTEIN CAE55504                                     | -0,423257204  |
| GVSGLYNTGGLPPGT   | YP_177963; PPE FAMILY PROTEIN                                   | -0,423498997  |
| TNFKVDQPGTVTLTF   | CAA17111.1; PROBABLE ISOCITRATE DEHYDROGENASE                   | -0,424383813  |
| GLQRRDPRWEADLDV   | MYCOBACTERIUM BOVIS MYCOCEROSIC ACID SYNTHASE GENE; M95808      | -0,425166169  |
| LSAAAEALTGLGDKF   | MCE-FAMILY PROTEIN MCE1AYP_177701                               | -0,425227909  |
| ALPGIVGGAPNPYTY   | MCE-FAMILY PROTEIN MCE1AYP_177701                               | -0,425507463  |
| QAAMSAQAFHQGESS   | CONSERVED HYPOTHETICAL PROTEIN TB9.8 CAD93159                   | -0,425644737  |
| IVAIGTYCPAVIAPL   | CAB10947.1; PROBABLE LIOPROTEIN LPRJ                            | -0,425703183  |
| VDGGSTDETLDIANI   | POSSIBLE GLYCOSYL TRANSFERASE CAB05419                          | -0,425926156  |
| CAMVLLKRLPDALRD   | MYCOBACTERIUM BOVIS MYCOCEROSIC ACID SYNTHASE GENE; M95808      | -0,426146515  |
| VSWAVGSAKAGLTTL   | POSSIBLE HEMOLYSIN-LIKE PROTEIN CAA17201                        | -0,426510186  |
| AAAAPYAGWLGSVAA   | YP_177963; PPE FAMILY PROTEIN                                   | -0,426532959  |
| ERLIAAHLMDPAPQP   | TRANSMEMBRANE SERINE/THREONINE-PROTEIN KINASE D PKND NP_215446  | -0,426716291  |
| SRQSCGRVVRVTGRA   | POSSIBLE HEMOLYSIN CAA16235                                     | -0,426970474  |
| REVRDTSCLKVPHGES  | RNA POLYMERASE BETA-SUBUNIT AAA21416                            | -0,427332098  |
| ADGVLTAPQCTHYPL   | MYCOBACTERIUM BOVIS MYCOCEROSIC ACID SYNTHASE GENE; M95808      | -0,427491471  |
| GDRRKAMLQDMAIT    | 60 kDa chaperonin 2 P0A521                                      | -0,427714015  |
| TPANQAISMIDGPAP   | PERIPLASMIC PHOSPHATE-BINDING LIOPROTEIN PSTS1 YP_177770        | -0,428553732  |
| GNWPSQTGHSPA VPN  | TRANSMEMBRANE SERINE/THREONINE-PROTEIN KINASE D PKND NP_215446  | -0,4293466    |
| TSQAATFAANRLDHA   | PROBABLE CUTINASE PRECURSOR CFP21 NP_216500                     | -0,42969896   |
| KSQPWILAYEDHNVD   | MTB81 (publication)                                             | -0,429939678  |
| VGAALVRDDNRIAPL   | CONSERVED HYPOTHETICAL PROTEIN CAB08634                         | -0,430011713  |

| Peptides         | Protein                                                                | Average Index |
|------------------|------------------------------------------------------------------------|---------------|
| VKTGSDFVSFAVPTI  | ALTERNATE RNA POLYMERASE SIGMA FACTOR SIGF CAB07069                    | -0,430095837  |
| MTVPGGVEVPVETDD  | RNA POLYMERASE BETA-SUBUNIT AAA21416                                   | -0,430192234  |
| DGEMALGKNLLVAIM  | RNA POLYMERASE BETA-SUBUNIT AAA21416                                   | -0,430274464  |
| DAPLPAWTHARLFID  | MYCOBACTERIUM BOVIS MYCOCEROSIC ACID SYNTHASE GENE; M95808             | -0,431082006  |
| FTVAPINLNPTTLHF  | YP_177963; PPE FAMILY PROTEIN                                          | -0,431522639  |
| EIAVEQAALQSAWQG  | CAA17363.1; LOW MOLECULAR WEIGHT PROTEIN ANTIGEN 7 ESXH                | -0,432044813  |
| QVPSPSMGRDIKVQF  | CAB10044.1; SECRETED ANTIGEN 85-B FBPB (85B)                           | -0,43206872   |
| AADILKDESYKVTGT  | CAB08889.1; IRON-REGULATED CONSERVED HYPOTHETICAL PROTEIN              | -0,432171862  |
| SLLGKARKVVVTKDE  | 60 kDa chaperonin 2 P0A521                                             | -0,432270642  |
| MGDAGGYKAADMWGP  | CAB10044.1; SECRETED ANTIGEN 85-B FBPB (85B)                           | -0,432552722  |
| GQTYTIPLDTPPAPA  | YP_177963; PPE FAMILY PROTEIN                                          | -0,432612296  |
| PALDQVIAGKMAKNP  | TRANSMEMBRANE SERINE/THREONINE-PROTEIN KINASE D PKND NP_215446         | -0,432871595  |
| NSGAGNLGLFNSGTG  | YP_177963; PPE FAMILY PROTEIN                                          | -0,432906169  |
| LLTELHRAGAALDYS  | MYCOBACTERIUM BOVIS MYCOCEROSIC ACID SYNTHASE GENE; M95808             | -0,433086527  |
| VALPDKSTGLANPGQ  | MTB81 (publication)                                                    | -0,433342656  |
| GAALGIGNIGLGNAG  | YP_177963; PPE FAMILY PROTEIN                                          | -0,433357873  |
| LAGALPGIVGGAPNP  | MCE-FAMILY PROTEIN MCE1AYP_177701                                      | -0,433381559  |
| IKSDDTVGRVKVYEA  | RNA POLYMERASE BETA-SUBUNIT AAA21416                                   | -0,433405402  |
| KVPRRLKELHLRLGT  | ALTERNATE RNA POLYMERASE SIGMA FACTOR SIGF CAB07069                    | -0,434404091  |
| MGTVPNVGLMAQQAE  | PROBABLE ISOCITRATE DEHYDROGENASE CAA16247                             | -0,434783599  |
| VPGAKAPKLVSNSLV  | SECRETED L-ALANINE DEHYDROGENASE ALD CAA15575                          | -0,435386881  |
| NMEAVERAGAGVLLR  | POSSIBLE GLYCOSYL TRANSFERASE CAB05415                                 | -0,435433277  |
| TAAPKTYCEELKGTD  | CAA98382.1; IMMUNOGENIC PROTEIN MPT64                                  | -0,435996354  |
| ALVSGLGNVGDHLSG  | YP_177963; PPE FAMILY PROTEIN                                          | -0,436063024  |
| RVEDVLGLPQNTMKI  | MTB81 (publication)                                                    | -0,436377351  |
| GVRPGAVVGHSMGES  | MYCOBACTERIUM BOVIS MYCOCEROSIC ACID SYNTHASE GENE; M95808             | -0,436810721  |
| ESAAKFILDVDPRI   | MCE-FAMILY PROTEIN MCE1AYP_177701                                      | -0,437122828  |
| VLNSLTGAAQRAGLE  | MYCOBACTERIUM BOVIS MYCOCEROSIC ACID SYNTHASE GENE; M95808             | -0,437280219  |
| TSDGFHMAVPDPNGE  | 3-OXOACYL-[ACYL-CARRIER PROTEIN] SYNTHASE 2 KASB CAA94642              | -0,437794325  |
| PLALLASASIGTLGF  | YP_177963; PPE FAMILY PROTEIN                                          | -0,43793773   |
| GDRVVISAPQGLEVV  | MYCOBACTERIUM BOVIS ACYL-COA SYNTHASE GENE; U75685                     | -0,438056584  |
| GNDLVLDTSSFYRPT  | PERIPLASMIC PHOSPHATE-BINDING LIPOPROTEIN PSTS2 YP_177769              | -0,438061583  |
| DGDKLAGRHGKNGVI  | RNA POLYMERASE BETA-SUBUNIT AAA21416                                   | -0,438187967  |
| GNVNTGALITGNFSN  | YP_177963; PPE FAMILY PROTEIN                                          | -0,438231233  |
| AGLDPNTATAGELAR  | HYPOTHETICAL PROTEIN RV2626C NP_217142                                 | -0,438350778  |
| IATFAAPVALAAYPI  | CAB06500.1; IMMUNOGENIC PROTEIN MPT63                                  | -0,438481893  |
| LQAGRIAVPLSVPQG  | MYCOBACTERIUM BOVIS ACYL-COA SYNTHASE GENE; U75685                     | -0,439195146  |
| FIDDDGQEQRAQGAC  | MYCOBACTERIUM BOVIS MYCOCEROSIC ACID SYNTHASE GENE; M95808             | -0,439498504  |
| SFWAGVDKVVADLTP  | MTB81 (publication)                                                    | -0,439531655  |
| PVSTTGEAGNQNTVL  | CAA17582.1; PROBABLE SERINE PROTEASE PEPD                              | -0,439570291  |
| PTLSTTGVPVHAVFNA | YP_177963; PPE FAMILY PROTEIN                                          | -0,440091071  |
| VPPAGNKRKRVWAVVG | TRANSMEMBRANE SERINE/THREONINE-PROTEIN KINASE D PKND NP_215446         | -0,440284314  |
| IGDRNLGIGNTGNNW  | PPE FAMILY PROTEIN CAE55504                                            | -0,440415879  |
| VAAAGFGHRVEIDLC  | PUTATIVE CYCLOPROPANE-FATTY-ACYL-PHOSPHOLIPID SYNTHASE UFAA1 NP_854118 | -0,440819576  |
| VIVDASMPAMIRAGG  | PROBABLE ISOCITRATE DEHYDROGENASE CAA16247                             | -0,440983133  |
| VPLNPSTGQPDRAE   | PERIPLASMIC PHOSPHATE-BINDING LIPOPROTEIN PSTS2 YP_177769              | -0,441100394  |
| PMVPPTGSPGGGLPA  | MTB48 AAK31576                                                         | -0,4414346    |
| TQTWIQYIFPGLL    | PUTATIVE CYCLOPROPANE-FATTY-ACYL-PHOSPHOLIPID SYNTHASE UFAA1 NP_854118 | -0,44235695   |
| GDKDGRTLREIRYGS  | CAA17343.1; HEAT SHOCK PROTEIN HSP                                     | -0,442386107  |
| DVVSVVVASPQSTVI  | MYCOBACTERIUM BOVIS MYCOCEROSIC ACID SYNTHASE GENE; M95808             | -0,442652271  |
| VAFLGALQAGRIAVP  | MYCOBACTERIUM BOVIS ACYL-COA SYNTHASE GENE; U75685                     | -0,442925985  |

| Peptides          | Protein                                                                      | Average Index |
|-------------------|------------------------------------------------------------------------------|---------------|
| KYLDGASNGAWGKGA   | PERIPLASMIC PHOSPHATE-BINDING LIPOPROTEIN PSTS2 YP_177769                    | -0,443194668  |
| TPYRKVVVDGVVSDIEI | RNA POLYMERASE BETA-SUBUNIT AAA21416                                         | -0,443305246  |
| VAPVSPSTASSRTDT   | PPE FAMILY PROTEIN CAE55489                                                  | -0,443490493  |
| EVIEGLLAGSSYHTL   | ALTERNATE RNA POLYMERASE SIGMA FACTOR SIGF CAB07069                          | -0,443519941  |
| AYTLQELLTIKSDDT   | RNA POLYMERASE BETA-SUBUNIT AAA21416                                         | -0,443771691  |
| ADLVIGAVLVPGAKA   | SECRETED L-ALANINE DEHYDROGENASE ALD CAA15575                                | -0,443978653  |
| DLVYGDVIMRSTNFR   | POSSIBLE GLYCOSYL TRANSFERASE CAB05419                                       | -0,444172323  |
| NNLGIGLTGDNQTGI   | YP_177963; PPE FAMILY PROTEIN                                                | -0,444482284  |
| TTTATVLAQALVREG   | 60 kDa chaperonin 2 P0A521                                                   | -0,444816058  |
| RLLVEQASVILRRTI   | MYCOBACTERIUM BOVIS MYCOCEROSIC ACID SYNTHASE GENE; M95808                   | -0,445484355  |
| QFRFGPITVSNVQLN   | YP_177963; PPE FAMILY PROTEIN                                                | -0,446415892  |
| DAAPDLDFLDSSVT    | MCE-FAMILY PROTEIN MCE1AYP_177701                                            | -0,447146203  |
| GAADPRAPSLFIHRP   | PUTATIVE CYCLOPROPANE-FATTY-ACYL-PHOSPHOLIPID SYNTHASE UFAA1 NP_854118       | -0,4473313    |
| AVGEPVVAMGNSGGQ   | CAB09453.1; PROBABLE SERINE PROTEASE PEPA                                    | -0,44751555   |
| GVLNVGSGISGLYNT   | YP_177963; PPE FAMILY PROTEIN                                                | -0,447875314  |
| DDRPINSADALVAHV   | CAA17582.1; PROBABLE SERINE PROTEASE PEPD                                    | -0,447927254  |
| TSVLMTAGDKTVEAE   | CAA17111.1; PROBABLE ISOCITRATE DEHYDROGENASE                                | -0,448150777  |
| GIPETKNNFEFVAI    | SECRETED L-ALANINE DEHYDROGENASE ALD CAA15575                                | -0,448213252  |
| EFGGLSNTIVDKFL    | POSSIBLE GLYCOSYL TRANSFERASE CAB05419                                       | -0,448274642  |
| ETVGVEAHGTGTPI    | MYCOBACTERIUM BOVIS MYCOCEROSIC ACID SYNTHASE GENE; M95808                   | -0,448373307  |
| TLVDMSKDAVLMVVG   | HYPOTHETICAL PROTEIN RV2623 NP_217139                                        | -0,448435311  |
| DANASIQEMLNVME    | HYPOTHETICAL PROTEIN RV2626C NP_217142                                       | -0,449203207  |
| ARIFAGAGLGPMLAA   | PPE FAMILY PROTEIN CAE55504                                                  | -0,449478992  |
| EALERAGAGVLLRTE   | POSSIBLE GLYCOSYL TRANSFERASE CAB05418                                       | -0,449856131  |
| GSLGLMTSVLMTADG   | CAA17111.1; PROBABLE ISOCITRATE DEHYDROGENASE                                | -0,449944193  |
| RREQPLPHGLRGLLT   | MYCOBACTERIUM BOVIS MYCOCEROSIC ACID SYNTHASE GENE; M95808                   | -0,450151159  |
| EVLLKIAQGRIFYNT   | POSSIBLE GLYCOSYL TRANSFERASE CAB05418                                       | -0,450410866  |
| ALVDASDALRIVMAD   | CAA16030.1; PROBABLE MOLYBDOPTERIN-GUANINE DINUCLEOTIDE BIOSYNTHESIS PROTEIN | -0,450777854  |
| TVLPFTGIDFRLSPS   | TRANSMEMBRANE SERINE/THREONINE-PROTEIN KINASE D PKND NP_215446               | -0,451449775  |
| DKVIAYARKFLDDSV   | MTB81 (publication)                                                          | -0,45156774   |
| AGDQSIGDLIAEAMD   | 60 kDa chaperonin 2 P0A521                                                   | -0,451646295  |
| PKPATSPAAPVTTAA   | CAA98350.1; CELL SURFACE LIPOPROTEIN MPT83                                   | -0,451655723  |
| AVVLPGLVGLAGGAA   | CAB10044.1; SECRETED ANTIGEN 85-B FBPB (85B)                                 | -0,451893278  |
| ATVIDLSTAMPFAV    | PROBABLE CUTINASE PRECURSOR CFP21 NP_216500                                  | -0,452476706  |
| KGTFTINGTERVVVS   | RNA POLYMERASE BETA-SUBUNIT AAA21416                                         | -0,452619638  |
| GLVDLLGADPELDVV   | TWO COMPONENT TRANSCRIPTIONAL REGULATORY PROTEIN DEVR NP_217649              | -0,452639041  |
| PAAPMVPPTGSPGGG   | MTB48 AAK31576                                                               | -0,45265782   |
| PMLSTLTALSGLKN    | CAA98350.1; CELL SURFACE LIPOPROTEIN MPT83                                   | -0,453053769  |
| GAFTIPQIDIPALNP   | YP_177963; PPE FAMILY PROTEIN                                                | -0,453216     |
| QNPTGPGSVAGMAQD   | CAA98350.1; CELL SURFACE LIPOPROTEIN MPT83                                   | -0,453376988  |
| NTAASDNFQLSQGGQ   | CAB09453.1; PROBABLE SERINE PROTEASE PEPA                                    | -0,453391308  |
| QLRGRDGVVIVYGPR   | MYCOBACTERIUM BOVIS MYCOCEROSIC ACID SYNTHASE GENE; M95808                   | -0,453496483  |
| ERGLNALADAVKVTL   | 60 kDa chaperonin 2 P0A521                                                   | -0,453527383  |
| VRWVDQGVGCSKVPD   | MTB81 (publication)                                                          | -0,453586825  |
| VNMNAQLVGVNSAIA   | CAA17582.1; PROBABLE SERINE PROTEASE PEPD                                    | -0,453588068  |
| NIGIGNIGDRNLGIG   | PPE FAMILY PROTEIN CAE55504                                                  | -0,454116678  |
| QLARTPVIVARESLT   | HYPOTHETICAL PROTEIN RV2623 NP_217139                                        | -0,45452003   |
| NEDVIVRELTEVQGE   | PROBABLE ISOCITRATE DEHYDROGENASE CAA16247                                   | -0,45528904   |
| RLLDVAGVQQGSHVL   | PUTATIVE CYCLOPROPANE-FATTY-ACYL-PHOSPHOLIPID SYNTHASE UFAA1 NP_854118       | -0,455441619  |
| RDGETTRHATAALRA   | MYCOBACTERIUM BOVIS MYCOCEROSIC ACID SYNTHASE GENE; M95808                   | -0,455666774  |
| IPAFGGGTAPIPSVG   | YP_177963; PPE FAMILY PROTEIN                                                | -0,456285775  |
| APKIVSGPVVVELDG   | CAA17111.1; PROBABLE ISOCITRATE DEHYDROGENASE                                | -0,456407856  |
| IVDVATGEVLLTENV   | PROBABLE ISOCITRATE DEHYDROGENASE CAA16247                                   | -0,456507307  |
| PHSWTTAAPEIQLAV   | PPE FAMILY PROTEIN CAE55334                                                  | -0,457348754  |

| Peptides         | Protein                                                                | Average Index |
|------------------|------------------------------------------------------------------------|---------------|
| HGVGVKCATITPDEA  | CAA17111.1; PROBABLE ISOCITRATE DEHYDROGENASE                          | -0,457445039  |
| TKRYAGLTAANTKKV  | POSSIBLE GLYCOSYL TRANSFERASE CAB05419                                 | -0,457655521  |
| GVLNSGVDISGMFNV  | YP_177963; PPE FAMILY PROTEIN                                          | -0,457740534  |
| GDTNTGGFNPGSTNT  | YP_177963; PPE FAMILY PROTEIN                                          | -0,458281376  |
| FFGTSQLSQFMDQNN  | RNA POLYMERASE BETA-SUBUNIT AAA21416                                   | -0,45834549   |
| VVRLELPGIDVDKDV  | CAA17343.1; HEAT SHOCK PROTEIN HSP                                     | -0,45851791   |
| GQVTSGLTAGVWQGA  | YP_177963; PPE FAMILY PROTEIN                                          | -0,458634572  |
| VNSAAGLHAPMQPGR  | CAA16030.1; PROBABLE MOLYBDOPTERIN-GUANINE                             |               |
| LIALPPDLASGVVQP  | DINUCLEOTIDE BIOSYNTHESIS PROTEIN                                      | -0,458765012  |
|                  | PPE FAMILY PROTEIN CAE55504                                            | -0,459330007  |
| RPIVGAPVDALVNLA  | CAB08889.1; IRON-REGULATED CONSERVED HYPOTHETICAL PROTEIN              | -0,459661412  |
| SVGPITISPITLFP   | YP_177963; PPE FAMILY PROTEIN                                          | -0,460445094  |
| NGGSPTTQQALAAGV  | POSSIBLE GLYCOSYL TRANSFERASE CAB05418                                 | -0,460497108  |
| VGWLNTAAGQAAQAA  | PPE FAMILY PROTEIN CAE55504                                            | -0,460664187  |
| SGAGGVSGFGNFAG   | YP_177963; PPE FAMILY PROTEIN                                          | -0,46076614   |
| LHSVKIPSRGAWLE   | RNA POLYMERASE BETA-SUBUNIT AAA21416                                   | -0,460860608  |
| GALLRYAATNRLGSH  | CONSERVED HYPOTHETICAL PROTEIN CAB08634                                | -0,460877836  |
| LALLAGVFGGAASCA  | CAB10947.1; PROBABLE LIPOPROTEIN LPRJ                                  | -0,461138003  |
| FRRSRLPAHVTSEA   | CAA17343.1; HEAT SHOCK PROTEIN HSP                                     | -0,461333076  |
| SLGFGNLLSFASLPT  | CAB06237.1; CONSERVED HYPOTHETICAL PROTEIN                             | -0,461362752  |
| LSRMPDLRCLITSY   | TWO COMPONENT TRANSCRIPTIONAL REGULATORY PROTEIN                       |               |
| PGQFAGYTGAAESPT  | DEVR NP_217649                                                         | -0,46165991   |
| VTIPTITTSPIPLKI  | MTB81 (publication)                                                    | -0,461879829  |
| YKITGTATGVDMANP  | YP_177963; PPE FAMILY PROTEIN                                          | -0,461948253  |
|                  | LIPOPROTEIN LPQH PRECURSOR P0A5J0                                      | -0,462145469  |
| SFYRPTQPGSYPIVL  | PERIPLASMIC PHOSPHATE-BINDING LIPOPROTEIN PSTS2                        |               |
| IPEGPICESFKVLLK  | YP_177769                                                              | -0,462310681  |
|                  | RNA POLYMERASE BETA-SUBUNIT AAA21416                                   | -0,462451649  |
| GFAQMRIVMSTNNDD  | 3-OXOACYL-[ACYL-CARRIER PROTEIN] SYNTHASE 2 KASB                       |               |
| LIGSPRWRESAAERG  | CAA94642                                                               | -0,46274693   |
| DKDGTAFRLVLRDR   | RNA POLYMERASE BETA-SUBUNIT AAA21416                                   | -0,462756459  |
| LFSRVEDVLGLPQNT  | MTB81 (publication)                                                    | -0,463570756  |
| SRQSKTAASPSRP    | MTB81 (publication)                                                    | -0,463972314  |
| PTITTSPIPLKIDVS  | RNA POLYMERASE BETA-SUBUNIT AAA21416                                   | -0,464968485  |
|                  | YP_177963; PPE FAMILY PROTEIN                                          | -0,465484147  |
| LVLTTTAGGLASPYV  | MYCOBACTERIUM BOVIS MYCOCEROSIC ACID SYNTHASE GENE; M95808             | -0,46580825   |
| CELTAANKAAQQLVL  | MTB48 AAK31576                                                         | -0,466618146  |
| AILVAGLSGCSSNKS  | LIPOPROTEIN LPQH PRECURSOR P0A5J0                                      | -0,466795301  |
| LFLHSGLIAPDLA    | PPE FAMILY PROTEIN CAE55504                                            | -0,467593046  |
| PNIPLEAARFITP    | PPE FAMILY PROTEIN CAE55504                                            | -0,467888179  |
| VTYELAVDLAVPMIG  | CONSERVED HYPOTHETICAL PROTEIN TB16.3CAD97060                          | -0,469891081  |
| VGNLRIARVLYDFVN  | MTB81 (publication)                                                    | -0,469923575  |
| AATALDNDGEGTVQA  | MTB48 AAK31576                                                         | -0,470090457  |
| AGSYTPFALLALPAH  | POSSIBLE HEMOLYSIN-LIKE PROTEIN CAA17201                               | -0,470662438  |
| AQAGTESAVSGVEGL  | CAB01474.1; CONSERVED HYPOTHETICAL PROTEIN CFP17                       | -0,470887604  |
| LNGHHPGDVISVTWQ  | CAB09453.1; PROBABLE SERINE PROTEASE PEPA                              | -0,470955806  |
| PVDECKDKDMTYAAP  | RNA POLYMERASE BETA-SUBUNIT AAA21416                                   | -0,47166183   |
| QGSVLEIGTGWGEL   | PUTATIVE CYCLOPROPANE-FATTY-ACYL-PHOSPHOLIPID SYNTHASE UFAA1 NP_854118 | -0,471966246  |
| LLASNVGQNPITIVN  | YP_177963; PPE FAMILY PROTEIN                                          | -0,473576052  |
| VAARILAEFPDYLTE  | PROBABLE ISOCITRATE DEHYDROGENASE CAA16247                             | -0,473709184  |
| RAVADHLTRLVDAAD  | CONSERVED HYPOTHETICAL PROTEIN CAB08634                                | -0,474408747  |
| ASNNPELTTLTAALS  | CAA98373.1; MAJOR SECRETED IMMUNOGENIC PROTEIN                         | -0,474418539  |
| DKDMTYAAPLFVTAE  | RNA POLYMERASE BETA-SUBUNIT AAA21416                                   | -0,474600207  |
| QAAHARFVAAAQVN   | CONSERVED HYPOTHETICAL PROTEIN TB9.8 CAD93159                          | -0,474956724  |
| DAKQELIDSLEEAVR  | CONSERVED HYPOTHETICAL PROTEIN CAB08634                                | -0,475109143  |
| ALPFTPPVQGTGPA   | PPE FAMILY PROTEIN CAE55334                                            | -0,475185056  |
| TLTGNPNRPDGGILT  | PPE FAMILY PROTEIN CAE55504                                            | -0,475231272  |
| HDIGALPICGDDDRRL | HYPOTHETICAL PROTEIN RV2626C NP_217142                                 | -0,475244198  |
| EQRVPDNLAEGLRLT  | PROBABLE ISOCITRATE DEHYDROGENASE CAA16247                             | -0,476749649  |
| ILPTIPLNIHQTFSL  | YP_177963; PPE FAMILY PROTEIN                                          | -0,477001997  |
| ATADAYATTEAVNVV  | CAE55335.1; PE FAMILY PROTEIN                                          | -0,477450595  |
| KVVREIVSGLGLKEA  | CAB07109.1; PROBABLE 50S RIBOSOMAL PROTEIN L7/L12 RPLL                 | -0,47810553   |

| Peptides        | Protein                                                         | Average Index |
|-----------------|-----------------------------------------------------------------|---------------|
| AIPSIHLGIDPTFDV | YP_177963; PPE FAMILY PROTEIN                                   | -0,478110597  |
| VNNGLSDLYSKIESL | PROBABLE ISOCITRATE DEHYDROGENASE CAA16247                      | -0,478315304  |
| IDAITLFPGLTFPA  | YP_177963; PPE FAMILY PROTEIN                                   | -0,478736017  |
| IQRTVASCNPTRIVL | PROBABLE CUTINASE PRECURSOR CFP21 NP_216500                     | -0,479569044  |
| TLQGASVTVTGQGN  | CAA98373.1; MAJOR SECRETED IMMUNOGENIC PROTEIN                  | -0,479600214  |
| LGEATVVTGKARTTV | CONSERVED HYPOTHETICAL PROTEIN CAB08634                         | -0,479947992  |
| IAFNSGLEPGVVAEK | 60 kDa chaperonin 2 P0A521                                      | -0,480792719  |
| PFVRWLTDLCVQLSE | PPE FAMILY PROTEIN CAE55489                                     | -0,481350443  |
| LNIPQNAIPLTIDAS | YP_177963; PPE FAMILY PROTEIN                                   | -0,48161709   |
| VLCNGGSPTTQQALA | POSSIBLE GLYCOSYL TRANSFERASE CAB05418                          | -0,481684849  |
| DLAAAVDKDGTAFRL | MTB81 (publication)                                             | -0,481920542  |
| PQNAIPLTIDASGVL | YP_177963; PPE FAMILY PROTEIN                                   | -0,483459834  |
| RSNHGTCANQCPIVD | RNA POLYMERASE BETA-SUBUNIT AAA21416                            | -0,484210419  |
| GLSDLYSKIESLPAS | PROBABLE ISOCITRATE DEHYDROGENASE CAA16247                      | -0,485869731  |
| VAFTCELSRVEDVL  | MTB81 (publication)                                             | -0,485956583  |
| NVHAIVEEAPAEASA | MYCOBACTERIUM BOVIS MYCOCEROSIC ACID SYNTHASE GENE; M95808      | -0,48596588   |
| MSNAHTGKLVLDVP  | MYCOBACTERIUM BOVIS MYCOCEROSIC ACID SYNTHASE GENE; M95808      | -0,486091583  |
| ATVDPAAVAVNRMAM | YP_177963; PPE FAMILY PROTEIN                                   | -0,486230669  |
| TGKLVLDVPRSGRRS | MYCOBACTERIUM BOVIS MYCOCEROSIC ACID SYNTHASE GENE; M95808      | -0,486350773  |
| SGISGLYNTAIVGLG | YP_177963; PPE FAMILY PROTEIN                                   | -0,487488567  |
| AIAGILLKMCWPAAP | POSSIBLE HEMOLYSIN-LIKE PROTEIN CAA17201                        | -0,487769389  |
| LTNNHVIAAAKPPPL | CAA17582.1; PROBABLE SERINE PROTEASE PEPD                       | -0,487966593  |
| RLNTEGVAAAVKQVL | POSSIBLE GLYCOSYL TRANSFERASE CAB05418                          | -0,488156925  |
| VGSFRGRWLDPRHAG | CAA16102.1; ESAT-6 LIKE PROTEIN ESXQ                            | -0,488564591  |
| RRVPVISEHRLVGIV | HYPOTHETICAL PROTEIN RV2626C NP_217142                          | -0,48894731   |
| QSLSWTLESSSLLKS | CONSERVED HYPOTHETICAL PROTEIN TB16.3CAD97060                   | -0,489275909  |
| GTGTPIGDPIEYRSL | MYCOBACTERIUM BOVIS MYCOCEROSIC ACID SYNTHASE GENE; M95808      | -0,491310547  |
| EAEDTRKHRVVALKL | TRANSMEMBRANE SERINE/THREONINE-PROTEIN KINASE D PKND NP_215446  | -0,491704166  |
| TTSPIPLKIDVSGGL | YP_177963; PPE FAMILY PROTEIN                                   | -0,491837903  |
| ITNVAQQFEAEIGRG | CONSERVED HYPOTHETICAL PROTEIN CAB08634                         | -0,492307589  |
| QATPTFSSSAGADPT | PPE FAMILY PROTEIN CAE55334                                     | -0,492760294  |
| TVGLIKAILSLRHGV | MYCOBACTERIUM BOVIS MYCOCEROSIC ACID SYNTHASE GENE; M95808      | -0,493407964  |
| EADTLARVAAFIGE  | POSSIBLE GLYCOSYL TRANSFERASE CAB05419                          | -0,493586452  |
| PVPEPMVKMLLNNVL | CONSERVED HYPOTHETICAL PROTEIN TB18.5CAD93033                   | -0,493660432  |
| VGMNTAASDNFQLSQ | CAB09453.1; PROBABLE SERINE PROTEASE PEPA                       | -0,495455821  |
| VTATMGQLQQLVAAG | CAB06237.1; CONSERVED HYPOTHETICAL PROTEIN                      | -0,495819422  |
| ATIIPPIHIPSILG  | YP_177963; PPE FAMILY PROTEIN                                   | -0,496227786  |
| SLGISTGDVITAVDG | CAB09453.1; PROBABLE SERINE PROTEASE PEPA                       | -0,496315032  |
| LLSFASLPTVGQVTA | CAB06237.1; CONSERVED HYPOTHETICAL PROTEIN                      | -0,496539749  |
| SGQTVLPFTGIDFRL | TRANSMEMBRANE SERINE/THREONINE-PROTEIN KINASE D PKND NP_215446  | -0,49703719   |
| IDTSNAVDTPDMLAS | MYCOBACTERIUM BOVIS MYCOCEROSIC ACID SYNTHASE GENE; M95808      | -0,497752742  |
| ARAVKDVGAGRSLLD | TWO COMPONENT TRANSCRIPTIONAL REGULATORY PROTEIN DEVR NP_217649 | -0,497821857  |
| MLSARAGLVMDPGSK | MCE-FAMILY PROTEIN MCE1AYP_177701                               | -0,498944993  |
| QELIDSLEEAVRDSR | CONSERVED HYPOTHETICAL PROTEIN CAB08634                         | -0,499628669  |
| GNPLADLIQDLRLV  | PPE FAMILY PROTEIN CAE55504                                     | -0,499985451  |
| SGAEFRQAARRLAEA | POSSIBLE GLYCOSYL TRANSFERASE CAB05418                          | -0,502098398  |
| VLAIGSPLGLEGTVT | CAA17582.1; PROBABLE SERINE PROTEASE PEPD                       | -0,502974105  |
| DIARHLPEHAIVQFV | HYPOTHETICAL PROTEIN RV2626C NP_217142                          | -0,503335871  |
| PVALAAYPITGKLGS | CAB06500.1; IMMUNOGENIC PROTEIN MPT63                           | -0,504289731  |
| EYGSHDKTFEIPEDG | PROBABLE ISOCITRATE DEHYDROGENASE CAA16247                      | -0,504478414  |
| TGTAPIYEILHDAKE | CAB08889.1; IRON-REGULATED CONSERVED HYPOTHETICAL PROTEIN       | -0,508969903  |
| EHTQDAGDKDGRTLR | CAA17343.1; HEAT SHOCK PROTEIN HSP                              | -0,510336538  |
| GKSFQGGVGEARGN  | PERIPLASMIC PHOSPHATE-BINDING LIPOPROTEIN PSTS3 YP_177768       | -0,512072913  |
| RAQGACTITVHPLL  | MYCOBACTERIUM BOVIS MYCOCEROSIC ACID SYNTHASE GENE;             | -0,514164657  |

| Peptides         | Protein                                                                | Average Index |
|------------------|------------------------------------------------------------------------|---------------|
|                  | M95808                                                                 |               |
| LIKDMLILPYLDIRL  | CAA17111.1; PROBABLE ISOCITRATE DEHYDROGENASE                          | -0,514926182  |
| SERVATDLGVPTTEP  | SECRETED L-ALANINE DEHYDROGENASE ALD CAA15575                          | -0,51617529   |
| YRAALAAAGVQPETV  | MYCOBACTERIUM BOVIS MYCOCEROSIC ACID SYNTHASE GENE; M95808             | -0,517236555  |
| FLQSTIGAGQSGGLGD | PERIPLASMIC PHOSPHATE-BINDING LIPOPROTEIN PSTS3 YP_177768              | -0,517386614  |
| DNRLSLSVSARLAGI  | POSSIBLE GLYCOSYL TRANSFERASE CAB05418                                 | -0,518317919  |
| PIAHSTVLVAPVSPS  | PPE FAMILY PROTEIN CAE55489                                            | -0,518384738  |
| VTRSALQNAASIAGL  | 60 kDa chaperonin 2 P0A521                                             | -0,518700243  |
| AITAQQTVTGIDKVQ  | MYCOBACTERIUM BOVIS MYCOCEROSIC ACID SYNTHASE GENE; M95808             | -0,520766726  |
| LLAQPTPAWTELA    | PUTATIVE CYCLOPROPANE-FATTY-ACYL-PHOSPHOLIPID SYNTHASE UFAA1 NP_854118 | -0,522593704  |
| IPIPAIHIDFDGAAD  | YP_177963; PPE FAMILY PROTEIN                                          | -0,523206842  |
| TDLGRQSEEGSGIIL  | CAA17582.1; PROBABLE SERINE PROTEASE PEPD                              | -0,523412359  |
| NATNLRGILGRLIEM  | CAB06237.1; CONSERVED HYPOTHETICAL PROTEIN                             | -0,523603931  |
| NAFLTALTNAGIAYD  | CAB10947.1; PROBABLE LIPOPROTEIN LPRJ                                  | -0,524132996  |
| DRKILNEIAPDVVVG  | POSSIBLE GLYCOSYL TRANSFERASE CAB05418                                 | -0,524288392  |
| RAIPLLGNPLADLIQ  | PPE FAMILY PROTEIN CAE55504                                            | -0,528380844  |
| ARVYGAGTPCALGSA  | MYCOBACTERIUM BOVIS MYCOCEROSIC ACID SYNTHASE GENE; M95808             | -0,529834144  |
| ATTGSLALTLPTVTI  | YP_177963; PPE FAMILY PROTEIN                                          | -0,530040409  |
| HSPQVDPILDDLAAA  | MYCOBACTERIUM BOVIS MYCOCEROSIC ACID SYNTHASE GENE; M95808             | -0,531080296  |
| DPLSGLTDQERTLLG  | TWO COMPONENT TRANSCRIPTIONAL REGULATORY PROTEIN DEVR NP_217649        | -0,532169984  |
| ATGFTVQDQQLVVAL  | MTB81 (publication)                                                    | -0,535840048  |
| GREAAALSGDVAVKA  | MTB48 AAK31576                                                         | -0,536103708  |
| SAAPNFAFELAARRT  | MYCOBACTERIUM BOVIS ACYL-COA SYNTHASE GENE; U75685                     | -0,536871639  |
| ILSGSERVQAATIKR  | MYCOBACTERIUM BOVIS ACYL-COA SYNTHASE GENE; U75685                     | -0,541198663  |
| YAGEKSMTLDRARNV  | PROBABLE ISOCITRATE DEHYDROGENASE CAA16247                             | -0,541523747  |
| AAKPFVRWLTDLVCVQ | PPE FAMILY PROTEIN CAE55489                                            | -0,541766222  |
| VVIDRIPVELHASTT  | YP_177963; PPE FAMILY PROTEIN                                          | -0,542841778  |
| DSLLPLPNIPLEA    | PPE FAMILY PROTEIN CAE55504                                            | -0,543618292  |
| LGDVGEAFVDSLTSQ  | PROBABLE CUTINASE PRECURSOR CFP21 NP_216500                            | -0,543925235  |
| GFTIPGGTLIPQLPL  | YP_177963; PPE FAMILY PROTEIN                                          | -0,544148862  |
| QIENREVLRLPLEAL  | ALTERNATE RNA POLYMERASE SIGMA FACTOR SIGF CAB07069                    | -0,546293135  |
| VVGDNRLSLSVSARL  | POSSIBLE GLYCOSYL TRANSFERASE CAB05418                                 | -0,546564451  |
| PPTKESAQTLLLENLF | RNA POLYMERASE BETA-SUBUNIT AAA21416                                   | -0,547349912  |
| NKGDLAATAVDKDGTA | MTB81 (publication)                                                    | -0,548389968  |
| AARALPLTSLTSAAE  | CAE55371.1; PPE FAMILY PROTEIN                                         | -0,549355139  |
| PVGGLEEVLYELSPI  | RNA POLYMERASE BETA-SUBUNIT AAA21416                                   | -0,551921429  |
| IPIDIPPIDIPASTI  | YP_177963; PPE FAMILY PROTEIN                                          | -0,553269072  |
| DQHLNMEALERAGAG  | POSSIBLE GLYCOSYL TRANSFERASE CAB05418                                 | -0,558933009  |
| DAYATTEAVNVVATG  | CAE55335.1; PE FAMILY PROTEIN                                          | -0,559109979  |
| LLANWLRHGVITSAD  | MTB81 (publication)                                                    | -0,560507385  |
| VNLKLQFLHDAFPNE  | YP_177963; PPE FAMILY PROTEIN                                          | -0,562429303  |
| VTIQPVVLAATGDL   | CAE55335.1; PE FAMILY PROTEIN                                          | -0,562562212  |
| EHFASLADVLTKNED  | PROBABLE ISOCITRATE DEHYDROGENASE CAA16247                             | -0,562596844  |
| RVQRVVGSAAPASLG  | CAB09453.1; PROBABLE SERINE PROTEASE PEPA                              | -0,56861691   |
| TLFQTLTSAIEKVDP  | MCE-FAMILY PROTEIN MCE1AYP_177701                                      | -0,571792683  |
| ASLEAEHQAIVRDVL  | PUTATIVE ESAT-6 LIKE PROTEIN ESXN YP_177838                            | -0,57228867   |
| AALEQLVRPGGPVAI  | PUTATIVE CYCLOPROPANE-FATTY-ACYL-PHOSPHOLIPID SYNTHASE UFAA1 NP_854118 | -0,573846442  |
| KKIGIVIKVVREIVSG | CAB07109.1; PROBABLE 50S RIBOSOMAL PROTEIN L7/L12 RPLL                 | -0,574981242  |
| PRAGMLAIGAVTIAV  | CAA17582.1; PROBABLE SERINE PROTEASE PEPD                              | -0,575350245  |
| LNIHQIPLGFQVPGS  | YP_177963; PPE FAMILY PROTEIN                                          | -0,576134807  |
| AALAGMRREQPLPHG  | MYCOBACTERIUM BOVIS MYCOCEROSIC ACID SYNTHASE GENE; M95808             | -0,5792977    |
| AEINGMSRDMASTFT  | CAB10947.1; PROBABLE LIPOPROTEIN LPRJ                                  | -0,58434934   |
| LVNAAVRFVDVKTGSD | ALTERNATE RNA POLYMERASE SIGMA FACTOR SIGF CAB07069                    | -0,59046939   |
| LAGVFGGAAASCAPI  | CAB10947.1; PROBABLE LIPOPROTEIN LPRJ                                  | -0,59124871   |
| DVSVLTAARFTHATK  | CAE55335.1; PE FAMILY PROTEIN                                          | -0,592915012  |
| QIDIPALNPNTGSGV  | YP_177963; PPE FAMILY PROTEIN                                          | -0,596016156  |

| Peptides         | Protein                                                                      | Average Index |
|------------------|------------------------------------------------------------------------------|---------------|
| DELKTNSSLLTSILT  | CAA98373.1; MAJOR SECRETED IMMUNOGENIC PROTEIN                               | -0,596611332  |
| PGAVVGHSMMGESAAA | MYCOBACTERIUM BOVIS MYCOCEROSIC ACID SYNTHASE GENE; M95808                   | -0,597983199  |
| QLVVALPDKSTGLAN  | MTB81 (publication)                                                          | -0,602101234  |
| AIVGLGTPALVSGAG  | YP_177963; PPE FAMILY PROTEIN                                                | -0,602916048  |
| AAARGAHIRSVTLVS  | PUTATIVE CYCLOPROPANE-FATTY-ACYL-PHOSPHOLIPID SYNTHASE UFAA1 NP_854118       | -0,603666942  |
| ASEPVFAATIAKLEP  | MYCOBACTERIUM BOVIS MYCOCEROSIC ACID SYNTHASE GENE; M95808                   | -0,607288782  |
| TEGVAAAVKQVLSGA  | POSSIBLE GLYCOSYL TRANSFERASE CAB05418                                       | -0,607830219  |
| RAYPQCPLLLHAVDQ  | MYCOBACTERIUM BOVIS MYCOCEROSIC ACID SYNTHASE GENE; M95808                   | -0,609771995  |
| DGKMFIIIGRIKDLI  | MYCOBACTERIUM BOVIS ACYL-COA SYNTHASE GENE; U75685                           | -0,609962493  |
| ATNKTARALAAQYLAD | MYCOBACTERIUM BOVIS MYCOCEROSIC ACID SYNTHASE GENE; M95808                   | -0,619946612  |
| ADHLTRLVDAADPEV  | CONSERVED HYPOTHETICAL PROTEIN CAB08634                                      | -0,620221773  |
| DVRAEIVASVLEVVV  | CAB08316.1; BIOTINYLATED PROTEIN TB7.3                                       | -0,621564329  |
| AIPIGLELNGGVGPI  | YP_177963; PPE FAMILY PROTEIN                                                | -0,62413237   |
| AGDIPLINIPPTPGI  | YP_177963; PPE FAMILY PROTEIN                                                | -0,633342714  |
| MGPSLIGLAMGDAGG  | CAB10044.1; SECRETED ANTIGEN 85-B FBPB (85B)                                 | -0,64740066   |
| RAELMILIATNLLGQ  | CAE55371.1; PPE FAMILY PROTEIN                                               | -0,651125279  |
| RAKLLGKTLDAAGK   | PROBABLE ISOCITRATE DEHYDROGENASE CAA16247                                   | -0,657436644  |
| VFGGAASCAPIQAD   | CAB10947.1; PROBABLE LIPOPROTEIN LPRJ                                        | -0,658447949  |
| SITSRMAEINGMSRD  | CAB10947.1; PROBABLE LIPOPROTEIN LPRJ                                        | -0,675078091  |
| VAQSYLRNLAAPP    | LOW MOLECULAR WEIGHT T-CELL ANTIGEN TB8.4 NP_215690                          | -0,699561648  |
| DTADRLVSAATATGL  | MYCOBACTERIUM BOVIS MYCOCEROSIC ACID SYNTHASE GENE; M95808                   | -0,702277187  |
| NVLEHLAENLKQRAE  | CONSERVED HYPOTHETICAL PROTEIN TB18.5CAD93033                                | -0,705313583  |
| SRDMASTFTIVAIGT  | CAB10947.1; PROBABLE LIPOPROTEIN LPRJ                                        | -0,709452938  |
| SSILTYHYIAGQASP  | CAA98350.1; CELL SURFACE LIPOPROTEIN MPT83                                   | -0,718239167  |
| GFTIPAAPLPLTIDI  | YP_177963; PPE FAMILY PROTEIN                                                | -0,728513338  |
| AANDVSVLTAARFTA  | CAE55335.1; PE FAMILY PROTEIN                                                | -0,744665219  |
| LPSLPDIIDGLWPPK  | CAB06237.1; CONSERVED HYPOTHETICAL PROTEIN                                   | -0,751621634  |
| PVLAINAHLTGNAAM  | YP_177963; PPE FAMILY PROTEIN                                                | -0,770758114  |
| IIPDITLPIHLGL    | YP_177963; PPE FAMILY PROTEIN                                                | -0,77255184   |
| CVLGECLTGAPPYRA  | TRANSMEMBRANE SERINE/THREONINE-PROTEIN KINASE D PKND NP_215446               | -0,800689217  |
| LIDGALKDLKKRVEG  | CONSERVED HYPOTHETICAL PROTEIN TB16.3CAD97060                                | -0,812672106  |
| PSEEVLLKIAQGRLF  | POSSIBLE GLYCOSYL TRANSFERASE CAB05418                                       | -0,813940256  |
| LTDREIVIKGLAAGL  | HYPOTHETICAL PROTEIN RV2626C NP_217142                                       | -0,820897343  |
| TVELIEDLARRAVQT  | CAA16030.1; PROBABLE MOLYBDOPTERIN-GUANINE DINUCLEOTIDE BIOSYNTHESIS PROTEIN | -0,826108055  |
| QLVAAIKELQDKGYA  | PROBABLE ISOCITRATE DEHYDROGENASE CAA16247                                   | -0,833011504  |
| VPEMFRELVLGPAGS  | ALTERNATE RNA POLYMERASE SIGMA FACTOR SIGF CAB07069                          | -0,847381209  |
| LENADLSLLGKARKV  | 60 kDa chaperonin 2 P0A521                                                   | -0,848108173  |
| GYGVDIVLNSLTGAA  | MYCOBACTERIUM BOVIS MYCOCEROSIC ACID SYNTHASE GENE; M95808                   | -0,848203845  |
| DAAIGKLLDNKSPS   | PROBABLE ISOCITRATE DEHYDROGENASE CAA16247                                   | -0,863757443  |
| SKVSTVKDLLPLEK   | 60 kDa chaperonin 2 P0A521                                                   | -0,874279169  |
| LQQTIDAIELPAISF  | YP_177963; PPE FAMILY PROTEIN                                                | -0,881866384  |
| LLGKTLDAAGKLLD   | PROBABLE ISOCITRATE DEHYDROGENASE CAA16247                                   | -0,899734236  |
| LPELVEGLREVADGD  | MYCOBACTERIUM BOVIS MYCOCEROSIC ACID SYNTHASE GENE; M95808                   | -0,905163319  |
| GPYQLLRLLGRGGMG  | TRANSMEMBRANE SERINE/THREONINE-PROTEIN KINASE D PKND NP_215446               | -0,910251542  |
| VGLSTIAGRLLGSVP  | CAB08889.1; IRON-REGULATED CONSERVED HYPOTHETICAL PROTEIN                    | -0,912872514  |
| LVSSKVVSTVKDLLPL | 60 kDa chaperonin 2 P0A521                                                   | -0,951999699  |
| AGKPLLIADVEGE    | 60 kDa chaperonin 2 P0A521                                                   | -0,991330499  |
| GILGRLEMLTTLPK   | CAB06237.1; CONSERVED HYPOTHETICAL PROTEIN                                   | -1,135545356  |
| LPAAANDVSVLTAAR  | CAE55335.1; PE FAMILY PROTEIN                                                | -1,147225742  |
| YFKGVPSRLGYLLDL  | RNA POLYMERASE BETA'-SUBUNIT AAA21417                                        | 0,178853331   |
| SGLTDQERTLLGLLS  | TWO COMPONENT TRANSCRIPTIONAL REGULATORY PROTEIN DEVR NP_217649              | -0,254510782  |
| TSGGRNLLQLVLNAL  | POSSIBLE GLYCOSYL TRANSFERASE CAB05415                                       | -0,258911429  |

| Peptides        | Protein                                      | Average Index |
|-----------------|----------------------------------------------|---------------|
| LGGANIPAEFLENFV | CAB10044.1; SECRETED ANTIGEN 85-B FBPB (85B) | -0,432912877  |
| RQEAVLEDPYILLVS | 60 kDa chaperonin 2 P0A521                   | -0,473624042  |
| MAEDVRAEIVASVLE | CAB08316.1; BIOTINYLATED PROTEIN TB7.3       | -1,170759902  |

**Supplementary Table 6c. Peptides recognized only by IgA and not by IgG**

| Peptides         | Protein                                                                      | Average Index |
|------------------|------------------------------------------------------------------------------|---------------|
| RMCIKVDAPIRDWVK  | PROBABLE ISOCITRATE DEHYDROGENASE CAA16247                                   | 1,78007277    |
| IMYNYPAMMAHAGDM  | CAA16104.1; SECRETED ESAT-6 LIKE PROTEIN ESXR                                | 1,688376874   |
| GSGFGNFGANMSGWW  | YP_177963; PPE FAMILY PROTEIN                                                | 1,490983745   |
| LQRPARWMHLMASDF  | MYCOBACTERIUM BOVIS ACYL-COA SYNTHASE GENE; U75685                           | 1,294760404   |
| ERPLLFALQCMPLNW  | POSSIBLE GLYCOSYL TRANSFERASE CAB05415                                       | 1,256942606   |
| YNGWDINTPAFEWYY  | CAB10044.1; SECRETED ANTIGEN 85-B FBPB (85B)                                 | 1,215241303   |
| EMFASTGQRSRGPSK  | MYCOBACTERIUM BOVIS MYCOCEROSIC ACID SYNTHASE GENE; M95808                   | 1,164785023   |
| GGTHPTTTYKAFDWD  | CAA98382.1; IMMUNOGENIC PROTEIN MPT64                                        | 1,047504081   |
| SPACGKAGCQTYKWE  | CAB10044.1; SECRETED ANTIGEN 85-B FBPB (85B)                                 | 1,024058672   |
| VIMRSTNFRWGGAFD  | POSSIBLE GLYCOSYL TRANSFERASE CAB05419                                       | 0,925754789   |
| GFSSMLWGGGSLPTI  | PROBABLE CUTINASE PRECURSOR CFP21 NP_216500                                  | 0,755000782   |
| HHRMLATRHTQTWIK  | PUTATIVE CYCLOPROPANE-FATTY-ACYL-PHOSPHOLIPID SYNTHASE UFAA1 NP_854118       | 0,722282932   |
| TTYKAFDWDQAYRKP  | CAA98382.1; IMMUNOGENIC PROTEIN MPT64                                        | 0,713282246   |
| LKKMWLSPNGTIRNI  | CAA17111.1; PROBABLE ISOCITRATE DEHYDROGENASE                                | 0,632979924   |
| HMVGILGQRCAPVFEV | CAA16030.1; PROBABLE MOLYBDOPTERIN-GUANINE DINUCLEOTIDE BIOSYNTHESIS PROTEIN | 0,422205503   |
| SFSYGLNAKWVPVYLS | CAA17111.1; PROBABLE ISOCITRATE DEHYDROGENASE                                | 0,407767066   |
| LHDAKERAHNAGAKN  | CAB08889.1; IRON-REGULATED CONSERVED HYPOTHETICAL PROTEIN                    | 0,396315331   |
| LTEGMRFDKGYISGY  | 60 kDa chaperonin 2 P0A521                                                   | 0,355902737   |
| ELCRDLLSRMPDLRC  | TWO COMPONENT TRANSCRIPTIONAL REGULATORY PROTEIN DEVR NP_217649              | 0,355083166   |
| LYRRTLNVARELSRC  | MYCOBACTERIUM BOVIS ACYL-COA SYNTHASE GENE; U75685                           | 0,347223973   |
| LVPRSLHWLRPITPT  | PUTATIVE CYCLOPROPANE-FATTY-ACYL-PHOSPHOLIPID SYNTHASE UFAA1 NP_854118       | 0,336462173   |
| HAKARGANILARIMG  | 3-OXOACYL-[ACYL-CARRIER PROTEIN] SYNTHASE 2 KASB CAA94642                    | 0,321228196   |
| VAIQAITMPHHRMLA  | PUTATIVE CYCLOPROPANE-FATTY-ACYL-PHOSPHOLIPID SYNTHASE UFAA1 NP_854118       | 0,286487386   |
| LHSSGSTAQENAMEEQ | PERIPLASMIC PHOSPHATE-BINDING LIPOPROTEIN PSTS2 YP_177769                    | 0,27460646    |
| GLPQNTMKIGIMDEE  | MTB81 (publication)                                                          | 0,207822065   |
| VDLAVPMIGMLKRKA  | CONSERVED HYPOTHETICAL PROTEIN TB16.3CAD97060                                | 0,177200498   |
| AAAAMAAAAAPYAGW  | YP_177963; PPE FAMILY PROTEIN                                                | 0,175466394   |
| RRRYAEITNVAQQFE  | CONSERVED HYPOTHETICAL PROTEIN CAB08634                                      | 0,173636167   |
| APWGIAVDEAGTVYV  | TRANSMEMBRANE SERINE/THREONINE-PROTEIN KINASE D PKND NP_215446               | 0,170802063   |
| ASLADVLTKNEDVIV  | PROBABLE ISOCITRATE DEHYDROGENASE CAA16247                                   | 0,168923473   |
| GNIGHGNVGFNGSGL  | YP_177963; PPE FAMILY PROTEIN                                                | 0,163427776   |
| GNMGVGNIGFGNTGT  | YP_177963; PPE FAMILY PROTEIN                                                | 0,163389901   |
| WTRFFGVRPVSILYR  | POSSIBLE GLYCOSYL TRANSFERASE CAB05418                                       | 0,160020344   |
| SLRNAAKAYGEVDEE  | MTB48 AAK31576                                                               | 0,133716167   |
| GTGNIGFFNSGTGNF  | YP_177963; PPE FAMILY PROTEIN                                                | 0,129615059   |
| FLENFVRSSNLKFQD  | CAB10044.1; SECRETED ANTIGEN 85-B FBPB (85B)                                 | 0,125545256   |
| LDVIALYIASIATGS  | PPE FAMILY PROTEIN CAE55334                                                  | 0,116756224   |
| QRDEIIEDLHRCHEH  | PROBABLE ISOCITRATE DEHYDROGENASE CAA16247                                   | 0,106426342   |
| NIGFFNTGTGNWGLF  | YP_177963; PPE FAMILY PROTEIN                                                | 0,087061854   |
| VCNGGSLTTQALVA   | POSSIBLE GLYCOSYL TRANSFERASE CAB05415                                       | 0,083969388   |
| RAHNAGAKNVEERPI  | CAB08889.1; IRON-REGULATED CONSERVED HYPOTHETICAL PROTEIN                    | 0,078652353   |
| VHNVAALPGAAYCEM  | MYCOBACTERIUM BOVIS MYCOCEROSIC ACID SYNTHASE GENE; M95808                   | 0,07641947    |
| NSATAMADALNGHHP  | CAB09453.1; PROBABLE SERINE PROTEASE PEPA                                    | 0,073734394   |
| DKKEDEEGVAEERA   | CAB06237.1; CONSERVED HYPOTHETICAL PROTEIN                                   | 0,0731842     |
| IGLSMAGSSAMILAA  | CAB10044.1; SECRETED ANTIGEN 85-B FBPB (85B)                                 | 0,070124924   |
| ANLGVGNIGFANTGS  | YP_177963; PPE FAMILY PROTEIN                                                | 0,064905876   |
| PLDPSAMVAQVGPOV  | CAB09453.1; PROBABLE SERINE PROTEASE PEPA                                    | 0,060005742   |
| NVGNYNVGLGNVGIF  | YP_177963; PPE FAMILY PROTEIN                                                | 0,059154434   |

| Peptides         | Protein                                                                   | Average Index |
|------------------|---------------------------------------------------------------------------|---------------|
| DDYYDPEPGVPGRSV  | MYCOBACTERIUM BOVIS MYCOCEROSIC ACID SYNTHASE GENE; M95808                | 0,056488007   |
| FLGADDSLYEADTLA  | POSSIBLE GLYCOSYL TRANSFERASE CAB05419                                    | 0,056074631   |
| DTKLGAEIITRDIPN  | RNA POLYMERASE BETA-SUBUNIT AAA21416                                      | 0,054634259   |
| YSAGTAVLAGASLVA  | POSSIBLE HEMOLYSIN-LIKE PROTEIN CAA17201                                  | 0,049220808   |
| CPIETPEGPNIGLIG  | RNA POLYMERASE BETA-SUBUNIT AAA21416                                      | 0,04712074    |
| EYVWGRQVGDNTINP  | MCE-FAMILY PROTEIN MCE1AYP_177701                                         | 0,046020521   |
| GIFNLGAANVGAQNL  | YP_177963; PPE FAMILY PROTEIN                                             | 0,04406468    |
| LDQASQRGLGEAQLG  | PERIPLASMIC PHOSPHATE-BINDING LIPOPROTEIN PSTS1 YP_177770                 | 0,043484825   |
| ADLTVIGARDDLMVN  | CAA98350.1; CELL SURFACE LIPOPROTEIN MPT83                                | 0,039928437   |
| LQLGNLNIDTRINQS  | YP_177963; PPE FAMILY PROTEIN                                             | 0,037154078   |
| SETFNGGVGVGASGN  | PERIPLASMIC PHOSPHATE-BINDING LIPOPROTEIN PSTS2 YP_177769                 | 0,035845469   |
| STNIRQAGVQYSRAD  | CAA17966.1; 10 KDA CULTURE FILTRATE ANTIGEN ESXB                          | 0,034240818   |
| INTGWFTNGNANTGV  | YP_177963; PPE FAMILY PROTEIN                                             | 0,032366362   |
| VQRSEEAQLVVVGSR  | HYPOTHETICAL PROTEIN RV2623 NP_217139                                     | 0,029909141   |
| GNLGHGNVFGNSGL   | YP_177963; PPE FAMILY PROTEIN                                             | 0,029013584   |
| GGFSEGGCWRTFLTC  | MYCOBACTERIUM BOVIS MYCOCEROSIC ACID SYNTHASE GENE; M95808                | 0,028451818   |
| MARGIDVVVSVVAS   | MYCOBACTERIUM BOVIS MYCOCEROSIC ACID SYNTHASE GENE; M95808                | 0,027825825   |
| QTPSAAIDSDRWPAV  | PUTATIVE CYCLOPROPANE-FATTY-ACYL-PHOSPHOLIPID SYNTHASE<br>UFAA1 NP_854118 | 0,021093094   |
| GSSTAVFTGLTHEDY  | MYCOBACTERIUM BOVIS MYCOCEROSIC ACID SYNTHASE GENE; M95808                | 0,020125022   |
| VGLGNVGIFNLGAAN  | YP_177963; PPE FAMILY PROTEIN                                             | 0,017066441   |
| FNSGTGNIGFFNTGT  | YP_177963; PPE FAMILY PROTEIN                                             | 0,012037167   |
| HAVFNAASQAFNTPA  | YP_177963; PPE FAMILY PROTEIN                                             | 0,009875688   |
| SPAWDLPVTFGPIAI  | PERIPLASMIC PHOSPHATE-BINDING LIPOPROTEIN PSTS2 YP_177769                 | 0,007999217   |
| NIDTRINQSFVPTVN  | YP_177963; PPE FAMILY PROTEIN                                             | 0,007761387   |
| IPISVGPIITSPITL  | YP_177963; PPE FAMILY PROTEIN                                             | 0,00688814    |
| DLATGTWLLFLGADD  | POSSIBLE GLYCOSYL TRANSFERASE CAB05419                                    | 0,006667501   |
| ALAIQAQQVNYNLPG  | PERIPLASMIC PHOSPHATE-BINDING LIPOPROTEIN PSTS1 YP_177770                 | 0,003888854   |
| QNLGLGNLGDGNVGF  | YP_177963; PPE FAMILY PROTEIN                                             | 0,001228866   |
| VIFRSDKSGTSDNFQ  | PERIPLASMIC PHOSPHATE-BINDING LIPOPROTEIN PSTS2 YP_177769                 | 0,001100688   |
| AAVEEGIVAGGGVTL  | 60 kDa chaperonin 2 P0A521                                                | -0,000398969  |
| PGSTNTGWFTNGNAN  | YP_177963; PPE FAMILY PROTEIN                                             | -0,000610216  |
| AGADIVVECGNIAEP  | MYCOBACTERIUM BOVIS MYCOCEROSIC ACID SYNTHASE GENE; M95808                | -0,000645648  |
| GIDDVVSVVVASPQS  | MYCOBACTERIUM BOVIS MYCOCEROSIC ACID SYNTHASE GENE; M95808                | -0,001031727  |
| PILHRRRRREFKARAA | MTB81 (publication)                                                       | -0,003504892  |
| SSTGRCHSFDADADG  | MYCOBACTERIUM BOVIS MYCOCEROSIC ACID SYNTHASE GENE; M95808                | -0,005254835  |
| NYNVGLGNVGIFNLG  | YP_177963; PPE FAMILY PROTEIN                                             | -0,005505278  |
| NLTQGDVVKRFRGFD  | MTB48 AAK31576                                                            | -0,00574212   |
| GESIVNANTVLDDLN  | MCE-FAMILY PROTEIN MCE1AYP_177701                                         | -0,006974907  |
| AVIGNRRRRQDSKESK | MTB48 AAK31576                                                            | -0,007870634  |
| HFADGWNTFNLTQGG  | MTB48 AAK31576                                                            | -0,0086001    |
| YGLANLGVGNIGFAN  | YP_177963; PPE FAMILY PROTEIN                                             | -0,009416497  |
| GSVACQEFITQLGRN  | PUTATIVE ESAT-6 LIKE PROTEIN ESXN YP_177838                               | -0,011145626  |
| AGTVYVTEHNTNQVV  | TRANSMEMBRANE SERINE/THREONINE-PROTEIN KINASE D PKND<br>NP_215446         | -0,011221653  |
| ATPADTGLSQSESGI  | TRANSMEMBRANE SERINE/THREONINE-PROTEIN KINASE D PKND<br>NP_215446         | -0,014465115  |
| FGGKIVTPSPGTPEG  | MYCOBACTERIUM BOVIS ACYL-COA SYNTHASE GENE; U75685                        | -0,016356913  |
| SAKAGLTTLAYTAAT  | POSSIBLE HEMOLYSIN-LIKE PROTEIN CAA17201                                  | -0,018593176  |
| ARRNIAVHYDLSNDL  | PUTATIVE CYCLOPROPANE-FATTY-ACYL-PHOSPHOLIPID SYNTHASE<br>UFAA1 NP_854118 | -0,019546912  |
| LYDFVNNEALPGTDI  | MTB81 (publication)                                                       | -0,021510044  |
| PGSINTGWFTNGNAN  | YP_177963; PPE FAMILY PROTEIN                                             | -0,024359273  |
| MKRGLTVAVAGAAAIL | LIPOPROTEIN LPQH PRECURSOR P0A5J0                                         | -0,024756112  |
| HLNPLNIVNLGNVGS  | YP_177963; PPE FAMILY PROTEIN                                             | -0,025783132  |
| VSAGIGGAAASLVGF  | CAA17582.1; PROBABLE SERINE PROTEASE PEPD                                 | -0,026903461  |
| VNVGFGNVGDFNLGA  | YP_177963; PPE FAMILY PROTEIN                                             | -0,026969147  |
| NANVGFGNIGHGNVG  | YP_177963; PPE FAMILY PROTEIN                                             | -0,028713017  |
| NQAHTALAGAGSGIA  | YP_177963; PPE FAMILY PROTEIN                                             | -0,028790937  |
| GGALYSIGILYAVR   | POSSIBLE HEMOLYSIN-LIKE PROTEIN CAA17201                                  | -0,029063401  |
| TRLGIRLVIVLVRRW  | POSSIBLE GLYCOSYL TRANSFERASE CAB05419                                    | -0,029272125  |
| VHIGPTAFLGLGVVD  | CAB09453.1; PROBABLE SERINE PROTEASE PEPA                                 | -0,030343907  |
| FVPQAVTPWPNGNDH  | MYCOBACTERIUM BOVIS MYCOCEROSIC ACID SYNTHASE GENE; M95808                | -0,031416085  |
| TGVANAGNVNTGALI  | YP_177963; PPE FAMILY PROTEIN                                             | -0,031631245  |
| PQSRHDIQQLAALGD  | MCE-FAMILY PROTEIN MCE1AYP_177701                                         | -0,031866518  |

| Peptides         | Protein                                                        | Average Index |
|------------------|----------------------------------------------------------------|---------------|
| KPKMHGPAEVAFTCE  | MTB81 (publication)                                            | -0,037762727  |
| GTASTGLFNVGGFNT  | YP_177963; PPE FAMILY PROTEIN                                  | -0,038659419  |
| IGLANVGNGNVGLGN  | YP_177963; PPE FAMILY PROTEIN                                  | -0,038958561  |
| EADLDVLDEHGTVLL  | MYCOBACTERIUM BOVIS MYCOCEROSIC ACID SYNTHASE GENE; M95808     | -0,039833899  |
| DPGAAQFNASPVQA   | LOW MOLECULAR WEIGHT T-CELL ANTIGEN TB8.4 NP_215690            | -0,042576811  |
| NVGDVNLGAGNLGNL  | YP_177963; PPE FAMILY PROTEIN                                  | -0,043863529  |
| ATTVFGGKYVSLTTP  | MCE-FAMILY PROTEIN MCE1AYP_177701                              | -0,045888217  |
| IALYIASIATGSIAL  | PPE FAMILY PROTEIN CAE55334                                    | -0,046868415  |
| GGDPVAITIDSVGQT  | PERIPLASMIC PHOSPHATE-BINDING LIPOPROTEIN PSTS3 YP_177768      | -0,047705698  |
| PDVLVVGNGGPGVTA  | PPE FAMILY PROTEIN CAE55504                                    | -0,047740387  |
| GKVGIRVFSREDED   | RNA POLYMERASE BETA-SUBUNIT AAA21416                           | -0,048538976  |
| LLHFNRLPDELSDE   | MYCOBACTERIUM BOVIS MYCOCEROSIC ACID SYNTHASE GENE; M95808     | -0,048856577  |
| PVAITIDSVGQTIAG  | PERIPLASMIC PHOSPHATE-BINDING LIPOPROTEIN PSTS3 YP_177768      | -0,051128624  |
| AGPTQVLVPRSAIDS  | CAA98382.1; IMMUNOGENIC PROTEIN MPT64                          | -0,051236594  |
| AAGGHNAVFNFPPNG  | CAB10044.1; SECRETED ANTIGEN 85-B FBPB (85B)                   | -0,052533148  |
| ANMGVGNIGFANTGT  | YP_177963; PPE FAMILY PROTEIN                                  | -0,052563511  |
| FNSGTGNVGLFNSGT  | YP_177963; PPE FAMILY PROTEIN                                  | -0,054017439  |
| VAQGVTLNLHTAIMAQ | PPE FAMILY PROTEIN CAE55504                                    | -0,05418693   |
| GVWQGAAMAAAMAAA  | YP_177963; PPE FAMILY PROTEIN                                  | -0,05451461   |
| KAPAEQAQRIAITK   | CAA17343.1; HEAT SHOCK PROTEIN HSP                             | -0,054671614  |
| GASLVAVSWAVGSAK  | POSSIBLE HEMOLYSIN-LIKE PROTEIN CAA17201                       | -0,056110531  |
| VATAMIFLEHDDAN   | RNA POLYMERASE BETA-SUBUNIT AAA21416                           | -0,056489318  |
| ETGAGAGTVATTPAS  | PERIPLASMIC PHOSPHATE-BINDING LIPOPROTEIN PSTS1 YP_177770      | -0,060261359  |
| AKNVEERPVGAPVD   | CAB08889.1; IRON-REGULATED CONSERVED HYPOTHETICAL PROTEIN      | -0,060428811  |
| VHPLLGSVRLTEEP   | MYCOBACTERIUM BOVIS MYCOCEROSIC ACID SYNTHASE GENE; M95808     | -0,060440027  |
| REEVDNQCQSILGYV  | MTB81 (publication)                                            | -0,060719892  |
| GLAAGLAGVGNIGLG  | YP_177963; PPE FAMILY PROTEIN                                  | -0,061182062  |
| PRDDLIQVARVGLVN  | ALTERNATE RNA POLYMERASE SIGMA FACTOR SIGF CAB07069            | -0,062043534  |
| LFVGGALYSIGGILY  | POSSIBLE HEMOLYSIN-LIKE PROTEIN CAA17201                       | -0,062076714  |
| VVPDIVAPFGGGTA   | YP_177963; PPE FAMILY PROTEIN                                  | -0,063204947  |
| FNTGVANPGSYNTGS  | YP_177963; PPE FAMILY PROTEIN                                  | -0,063584088  |
| SPVTLAETGSTLLYP  | PERIPLASMIC PHOSPHATE-BINDING LIPOPROTEIN PSTS1 YP_177770      | -0,063974856  |
| WGGPPVASEVRGDAA  | POSSIBLE GLYCOSYL TRANSFERASE CAB05415                         | -0,064756397  |
| DSLTSQVGGRSIGVY  | PROBABLE CUTINASE PRECURSOR CFP21 NP_216500                    | -0,065314386  |
| TNTGWFNNTGNANTGV | YP_177963; PPE FAMILY PROTEIN                                  | -0,066367192  |
| GGNLGGQNLGLGNLG  | YP_177963; PPE FAMILY PROTEIN                                  | -0,066677883  |
| RQTIEGLRAAGADIV  | MYCOBACTERIUM BOVIS MYCOCEROSIC ACID SYNTHASE GENE; M95808     | -0,067168809  |
| QELDEISTNIRQAGV  | CAA17966.1; 10 KDA CULTURE FILTRATE ANTIGEN ESXB               | -0,067170483  |
| SRWGGFLDDVAGFDA  | MYCOBACTERIUM BOVIS MYCOCEROSIC ACID SYNTHASE GENE; M95808     | -0,067775736  |
| DANLAVTLPPGLTDE  | MYCOBACTERIUM BOVIS MYCOCEROSIC ACID SYNTHASE GENE; M95808     | -0,068422308  |
| IVEVVAGGAANAGV   | CAA17582.1; PROBABLE SERINE PROTEASE PEPD                      | -0,069143445  |
| STIGAGQSLGDNGY   | PERIPLASMIC PHOSPHATE-BINDING LIPOPROTEIN PSTS3 YP_177768      | -0,07015227   |
| HEVLIQAGAGEGSAI  | SECRETED L-ALANINE DEHYDROGENASE ALD CAA15575                  | -0,070399804  |
| RRILFVAEAVTLAHV  | POSSIBLE GLYCOSYL TRANSFERASE CAB05415                         | -0,07185028   |
| ADALNGHHPGDVISV  | CAB09453.1; PROBABLE SERINE PROTEASE PEPA                      | -0,072173031  |
| PEAAGPTQVLVPRSA  | CAA98382.1; IMMUNOGENIC PROTEIN MPT64                          | -0,072206766  |
| VGVLAAGALVLSACG  | PERIPLASMIC PHOSPHATE-BINDING LIPOPROTEIN PSTS3 YP_177768      | -0,072573497  |
| GADGKLKDTKAVNPE  | PROBABLE ISOCITRATE DEHYDROGENASE CAA16247                     | -0,072851137  |
| TDTDNRRVVKLEAES  | TRANSMEMBRANE SERINE/THREONINE-PROTEIN KINASE D PKND NP_215446 | -0,073012618  |
| AAAWGGSGSEAYQGV  | CAE55648                                                       | -0,073115281  |
| ATTGQASAKVDCGK   | PERIPLASMIC PHOSPHATE-BINDING LIPOPROTEIN PSTS3 YP_177768      | -0,07570331   |
| EGLTTGRSCQTDVDG  | POSSIBLE HEMOLYSIN CAA16235                                    | -0,076474667  |
| SPSRKTGELDNRRGSQ | PROBABLE ISOCITRATE DEHYDROGENASE CAA16247                     | -0,077357188  |
| IVRIVSDTCIECPD   | MYCOBACTERIUM BOVIS ACYL-COA SYNTHASE GENE; U75685             | -0,077492567  |
| QGLEYYVAFGLALQA  | MYCOBACTERIUM BOVIS ACYL-COA SYNTHASE GENE; U75685             | -0,079507215  |
| VLACGGGTNSSSSG   | PERIPLASMIC PHOSPHATE-BINDING LIPOPROTEIN PSTS2 YP_177769      | -0,080074312  |
| AGAGSGVLNVGTLNS  | YP_177963; PPE FAMILY PROTEIN                                  | -0,080756219  |
| GNWGLFNSSGSFNTGI | YP_177963; PPE FAMILY PROTEIN                                  | -0,081362342  |
| WIGSSAGLMVAAASP  | CAE55371.1; PPE FAMILY PROTEIN                                 | -0,082471726  |
| VVASYNFEGGLSNTI  | POSSIBLE GLYCOSYL TRANSFERASE CAB05419                         | -0,082831157  |
| YNLGFANVGVDNLGA  | YP_177963; PPE FAMILY PROTEIN                                  | -0,083184244  |
| LQPFTVAPINLNPTT  | YP_177963; PPE FAMILY PROTEIN                                  | -0,083261527  |
| NETDFAGSDVPLNPS  | PERIPLASMIC PHOSPHATE-BINDING LIPOPROTEIN PSTS2 YP_177769      | -0,083560136  |

| Peptides         | Protein                                                         | Average Index |
|------------------|-----------------------------------------------------------------|---------------|
| QYSRADEEQQALSS   | CAA17966.1; 10 KDA CULTURE FILTRATE ANTIGEN ESXB                | -0,0850419    |
| ANRAVKPTGSAAGL   | CAB10044.1; SECRETED ANTIGEN 85-B FBPB (85B)                    | -0,085168708  |
| PNGNDHTPKRVAVSS  | MYCOBACTERIUM BOVIS MYCOCEROSIC ACID SYNTHASE GENE; M95808      | -0,085238688  |
| DVAYRPMAPNFDDSI  | MTB81 (publication)                                             | -0,085672516  |
| GYPAVLTSPVSFLQR  | MYCOBACTERIUM BOVIS ACYL-COA SYNTHASE GENE; U75685              | -0,086618578  |
| ASGNLGSNGVGVGNI  | PPE FAMILY PROTEIN CAE55504                                     | -0,087404461  |
| TLGYTSGTGQGNASA  | LIPOPROTEIN LPQH PRECURSOR P0A5J0                               | -0,087698792  |
| PIINYEYAIVNNRQK  | PERIPLASMIC PHOSPHATE-BINDING LIPOPROTEIN PSTS1 YP_177770       | -0,088807903  |
| ITTSQVDAEITTTAG  | MTB81 (publication)                                             | -0,09007481   |
| NGSGAGVTQFLNNET  | PERIPLASMIC PHOSPHATE-BINDING LIPOPROTEIN PSTS2 YP_177769       | -0,090446532  |
| DGFVFGEGGALLIE   | 3-OXOACYL-[ACYL-CARRIER PROTEIN] SYNTHASE 2 KASB CAA94642       | -0,090625872  |
| LSWVQDTPPNDAQAG  | MYCOBACTERIUM BOVIS MYCOCEROSIC ACID SYNTHASE GENE; M95808      | -0,090950595  |
| NGDWYVARLTSPPLG  | MYCOBACTERIUM BOVIS MYCOCEROSIC ACID SYNTHASE GENE; M95808      | -0,091075676  |
| SGNNGTSALLQTTDG  | PERIPLASMIC PHOSPHATE-BINDING LIPOPROTEIN PSTS2 YP_177769       | -0,091569753  |
| AATAGRNHLKNVPAN  | POSSIBLE GLYCOSYL TRANSFERASE CAB05418                          | -0,091671887  |
| VGDVIQAGDLIAVIS  | CAB08316.1; BIOTINYLATED PROTEIN TB7.3                          | -0,091802362  |
| LNSVSSLNLDGPTLA  | PERIPLASMIC PHOSPHATE-BINDING LIPOPROTEIN PSTS3 YP_177768       | -0,092263374  |
| GVAVDNSGNVYVTD   | TRANSMEMBRANE SERINE/THREONINE-PROTEIN KINASE D PKND NP_215446  | -0,092363728  |
| RIGAEVRDGDILVGK  | RNA POLYMERASE BETA-SUBUNIT AAA21416                            | -0,092574985  |
| NTRLGLFPFRRGLTF  | MYCOBACTERIUM BOVIS MYCOCEROSIC ACID SYNTHASE GENE; M95808      | -0,092592434  |
| VAADLQQGAVQGVND  | PPE FAMILY PROTEIN CAE55504                                     | -0,09314742   |
| DVVGEAGSVAEAMAR  | TWO COMPONENT TRANSCRIPTIONAL REGULATORY PROTEIN DEVR NP_217649 | -0,093369942  |
| QPNPKARQTIEGLRA  | MYCOBACTERIUM BOVIS MYCOCEROSIC ACID SYNTHASE GENE; M95808      | -0,093396268  |
| LVAGVPVIGVAGNLD  | POSSIBLE GLYCOSYL TRANSFERASE CAB05415                          | -0,09370187   |
| SGFSNSGSGMSGVLN  | YP_177963; PPE FAMILY PROTEIN                                   | -0,094815     |
| TGQGNLSLKVGNADV  | CAA98373.1; MAJOR SECRETED IMMUNOGENIC PROTEIN                  | -0,095104118  |
| DQAITSAGRHPDSI   | CAB01474.1; CONSERVED HYPOTHETICAL PROTEIN CFP17                | -0,097145624  |
| VHPGYTATFLETSPQ  | PPE FAMILY PROTEIN CAE55504                                     | -0,097196198  |
| SPIINLGLADVGNYN  | YP_177963; PPE FAMILY PROTEIN                                   | -0,097886731  |
| IKAGDKVLIHSATGG  | MYCOBACTERIUM BOVIS MYCOCEROSIC ACID SYNTHASE GENE; M95808      | -0,097927132  |
| VGFGNLGHGNVGFGN  | YP_177963; PPE FAMILY PROTEIN                                   | -0,098142203  |
| AEATVYVATSKPGQP  | MYCOBACTERIUM BOVIS ACYL-COA SYNTHASE GENE; U75685              | -0,098255998  |
| TLLDVAQANLGEAAG  | CONSERVED HYPOTHETICAL PROTEIN TB9.8 CAD93159                   | -0,098432504  |
| TKSGGTRTGNVTLAE  | CAB09453.1; PROBABLE SERINE PROTEASE PEPA                       | -0,098580056  |
| MRDGVVIVYGPRVGD  | MYCOBACTERIUM BOVIS MYCOCEROSIC ACID SYNTHASE GENE; M95808      | -0,099482892  |
| MSQDMAQTFTSIAIS  | CONSERVED HYPOTHETICAL PROTEIN CAA15739                         | -0,099936523  |
| VAALPGAAYCEMALA  | MYCOBACTERIUM BOVIS MYCOCEROSIC ACID SYNTHASE GENE; M95808      | -0,100032724  |
| QMLLLDEQTPIDAVA  | MYCOBACTERIUM BOVIS MYCOCEROSIC ACID SYNTHASE GENE; M95808      | -0,100187394  |
| TIPGFTIPGGTLIPQ  | YP_177963; PPE FAMILY PROTEIN                                   | -0,100365757  |
| LLSEGLTNKQIADRM  | TWO COMPONENT TRANSCRIPTIONAL REGULATORY PROTEIN DEVR NP_217649 | -0,100558272  |
| AVGSAKAGLTTLAYT  | POSSIBLE HEMOLYSIN-LIKE PROTEIN CAA17201                        | -0,101270292  |
| QAAAGTVNIGASDAY  | PERIPLASMIC PHOSPHATE-BINDING LIPOPROTEIN PSTS1 YP_177770       | -0,101452603  |
| QSVCPILAEPPGGSFN | CONSERVED HYPOTHETICAL PROTEIN CAA15739                         | -0,102022931  |
| LNAGLGNVGNYNVGL  | YP_177963; PPE FAMILY PROTEIN                                   | -0,102175388  |
| FRLPLLFFVNALGDNW | YP_177963; PPE FAMILY PROTEIN                                   | -0,102445405  |
| SLAGSSTAVFTGLTH  | MYCOBACTERIUM BOVIS MYCOCEROSIC ACID SYNTHASE GENE; M95808      | -0,102548978  |
| EVGDGEAGSWLLIDT  | MYCOBACTERIUM BOVIS MYCOCEROSIC ACID SYNTHASE GENE; M95808      | -0,102631435  |
| QLGNSSGNFLLPDAQ  | PERIPLASMIC PHOSPHATE-BINDING LIPOPROTEIN PSTS1 YP_177770       | -0,10278039   |
| REVAVDVASHSPQVD  | MYCOBACTERIUM BOVIS MYCOCEROSIC ACID SYNTHASE GENE; M95808      | -0,102884629  |
| RAAGGSASRANEYAD  | ALTERNATE RNA POLYMERASE SIGMA FACTOR SIGF CAB07069             | -0,103119564  |
| NVDAGLAAGFSGRAQ  | MTB81 (publication)                                             | -0,105134662  |
| MSYEWPEDRQSLSWT  | CONSERVED HYPOTHETICAL PROTEIN TB16.3CAD97060                   | -0,106038748  |
| DARDTKLGAEIITRD  | RNA POLYMERASE BETA-SUBUNIT AAA21416                            | -0,106056173  |
| SADVRASLERMAPLV  | MTB81 (publication)                                             | -0,106062226  |
| VGVGNIQNDNIGNAN  | PPE FAMILY PROTEIN CAE55504                                     | -0,106098687  |
| ANVGNGNVGLGNIGN  | YP_177963; PPE FAMILY PROTEIN                                   | -0,106723311  |
| AGDLIAAHDALTTS   | TRANSMEMBRANE SERINE/THREONINE-PROTEIN KINASE D PKND NP_215446  | -0,107232369  |
| TPALVSGAGNVGQQL  | YP_177963; PPE FAMILY PROTEIN                                   | -0,107254223  |
| NRAERQILIDNNALG  | PPE FAMILY PROTEIN CAE55489                                     | -0,107673239  |
| VTLGAAFGGLTTAHT  | MYCOBACTERIUM BOVIS MYCOCEROSIC ACID SYNTHASE GENE; M95808      | -0,107678518  |
| DALTTSEQHQATTIL  | TRANSMEMBRANE SERINE/THREONINE-PROTEIN KINASE D PKND            | -0,108010439  |

| Peptides         | Protein                                                            | Average Index |
|------------------|--------------------------------------------------------------------|---------------|
|                  | NP_215446                                                          |               |
| LKALGWTSEQIVERF  | RNA POLYMERASE BETA-SUBUNIT AAA21416                               | -0,108333118  |
| AARGTTGGGGTRSGT  | PPE FAMILY PROTEIN CAE55334                                        | -0,108818947  |
| SRMPQSRHDIQQLAA  | MCE-FAMILY PROTEIN MCE1AYP_177701                                  | -0,10888443   |
| RTVGELIQNQIRVGM  | RNA POLYMERASE BETA-SUBUNIT AAA21416                               | -0,109092024  |
| AALAGAGSGVLNVGT  | YP_177963; PPE FAMILY PROTEIN                                      | -0,109358567  |
| VVDNNGNGARVQRVV  | CAB09453.1; PROBABLE SERINE PROTEASE PEPA                          | -0,109702926  |
| PGKLNKARVPPYKTA  | MCE-FAMILY PROTEIN MCE1AYP_177701                                  | -0,110003935  |
| TACSSGLMAVHLACR  | MYCOBACTERIUM BOVIS MYCOCEROSIC ACID SYNTHASE GENE; M95808         | -0,110923365  |
| LDAILAGASGYVVKD  | TWO COMPONENT TRANSCRIPTIONAL REGULATORY PROTEIN DEVR<br>NP_217649 | -0,111018335  |
| IIVGIDDSPAQVAV   | HYPOTHETICAL PROTEIN RV2623 NP_217139                              | -0,111313912  |
| YCGNGTPNELGGANI  | CAB10044.1; SECRETED ANTIGEN 85-B FBPB (85B)                       | -0,112266004  |
| GVPSAPLGSAGGAE   | MTB48 AAK31576                                                     | -0,112681112  |
| QEIENSDDYDREKL   | 60 kDa chaperonin 2 P0A521                                         | -0,113677548  |
| VHLACRSLHDGERDL  | MYCOBACTERIUM BOVIS MYCOCEROSIC ACID SYNTHASE GENE; M95808         | -0,113985899  |
| RWSWLLSVLAAYGLG  | CAB09453.1; PROBABLE SERINE PROTEASE PEPA                          | -0,114095674  |
| LASPYVVTGLNNSVA  | MYCOBACTERIUM BOVIS MYCOCEROSIC ACID SYNTHASE GENE; M95808         | -0,114399131  |
| NIGNANIGFGNRGDA  | PPE FAMILY PROTEIN CAE55504                                        | -0,114672487  |
| RGWIHVYSAGTAVLA  | POSSIBLE HEMOLYSIN-LIKE PROTEIN CAA17201                           | -0,114830203  |
| LAKLAGGVAVIKAGA  | 60 kDa chaperonin 2 P0A521                                         | -0,115051895  |
| VVGHSMDGESAAYVA  | MYCOBACTERIUM BOVIS MYCOCEROSIC ACID SYNTHASE GENE; M95808         | -0,115102422  |
| VNVFEQACPGQTLNY  | PERIPLASMIC PHOSPHATE-BINDING LIPOPROTEIN PSTS3 YP_177768          | -0,115282041  |
| AAPVAVAAAAGAAPAG | CAB07109.1; PROBABLE 50S RIBOSOMAL PROTEIN L7/L12 RPLL             | -0,115311343  |
| TGHSPAVPNALQASL  | TRANSMEMBRANE SERINE/THREONINE-PROTEIN KINASE D PKND<br>NP_215446  | -0,115468468  |
| NLGSGNVGVGNIGND  | PPE FAMILY PROTEIN CAE55504                                        | -0,115733024  |
| VGSVGETVAQLARTP  | HYPOTHETICAL PROTEIN RV2623 NP_217139                              | -0,116011147  |
| NIGLIGLSVYARVN   | RNA POLYMERASE BETA-SUBUNIT AAA21416                               | -0,116890348  |
| QGAAAAAMAAAAAPY  | YP_177963; PPE FAMILY PROTEIN                                      | -0,117531951  |
| PANVVGTRQTLQGAS  | CAA98373.1; MAJOR SECRETED IMMUNOGENIC PROTEIN                     | -0,117565879  |
| FGKPANPDVLVVNG   | PPE FAMILY PROTEIN CAE55504                                        | -0,11790677   |
| WGGSGSEAYQGVQKQK | CAE55648                                                           | -0,117913684  |
| HPRYSPPPQPGTPG   | CAA17582.1; PROBABLE SERINE PROTEASE PEPD                          | -0,118319063  |
| GLSVADLVLVAPGSI  | MYCOBACTERIUM BOVIS ACYL-COA SYNTHASE GENE; U75685                 | -0,11834566   |
| NGVTLGYSGTGQGN   | LIPOPROTEIN LPQH PRECURSOR P0A5J0                                  | -0,118370804  |
| VDCGGKKTCLKASGST | PERIPLASMIC PHOSPHATE-BINDING LIPOPROTEIN PSTS3 YP_177768          | -0,118386183  |
| AKAPKLVNSNLVAHM  | SECRETED L-ALANINE DEHYDROGENASE ALD CAA15575                      | -0,118601623  |
| GNIGDVNLGFGNIGG  | YP_177963; PPE FAMILY PROTEIN                                      | -0,118680095  |
| FADTDGIPPPNSALV  | MYCOBACTERIUM BOVIS ACYL-COA SYNTHASE GENE; U75685                 | -0,121999361  |
| WMSVTAGQAELTAAQ  | CAE55371.1; PPE FAMILY PROTEIN                                     | -0,122064629  |
| SDVPLSKDEAAAAQR  | PERIPLASMIC PHOSPHATE-BINDING LIPOPROTEIN PSTS3 YP_177768          | -0,12228096   |
| GIMDALFTGLIAIHG  | MTB81 (publication)                                                | -0,122344982  |
| HGAMIRAQAASLEAE  | PUTATIVE ESAT-6 LIKE PROTEIN ESXN YP_177838                        | -0,122525937  |
| PPVASEVRGDAAIST  | POSSIBLE GLYCOSYL TRANSFERASE CAB05415                             | -0,122603641  |
| NIGNANVFGFNIGHG  | YP_177963; PPE FAMILY PROTEIN                                      | -0,122930709  |
| MAGYHSGASAAAAAL  | YP_177963; PPE FAMILY PROTEIN                                      | -0,123571443  |
| DNATLLATPADTGLS  | TRANSMEMBRANE SERINE/THREONINE-PROTEIN KINASE D PKND<br>NP_215446  | -0,12428819   |
| SSGAALLGSPGQGAY  | MYCOBACTERIUM BOVIS MYCOCEROSIC ACID SYNTHASE GENE; M95808         | -0,124817347  |
| DIKVQFQSGGNNSPA  | CAB10044.1; SECRETED ANTIGEN 85-B FBPB (85B)                       | -0,125229582  |
| LDSSVTTARTINAQQ  | MCE-FAMILY PROTEIN MCE1AYP_177701                                  | -0,126157782  |
| GNVDHLSGLLASNV   | YP_177963; PPE FAMILY PROTEIN                                      | -0,126513753  |
| RGDSDDQDAMARLGA  | MYCOBACTERIUM BOVIS ACYL-COA SYNTHASE GENE; U75685                 | -0,127445645  |
| AQLASGNLGSNGVGV  | PPE FAMILY PROTEIN CAE55504                                        | -0,128116115  |
| PISVIFRSKSGTSD   | PERIPLASMIC PHOSPHATE-BINDING LIPOPROTEIN PSTS2 YP_177769          | -0,128228167  |
| DGNPPEVKSIVGLGNV | LIPOPROTEIN LPQH PRECURSOR P0A5J0                                  | -0,128567874  |
| PAGIKIEASDISVAA  | PROBABLE ISOCITRATE DEHYDROGENASE CAA16247                         | -0,128674924  |
| LAVTLPPGLTDEQAI  | MYCOBACTERIUM BOVIS MYCOCEROSIC ACID SYNTHASE GENE; M95808         | -0,12994407   |
| PNGYTEPILHRRRRE  | MTB81 (publication)                                                | -0,130436128  |
| SGSEAYQGVQKQKWD  | CAE55648                                                           | -0,130618607  |
| NNIGIGLTGDNLTGI  | YP_177963; PPE FAMILY PROTEIN                                      | -0,130649363  |
| GWFTNGNANTGVANA  | YP_177963; PPE FAMILY PROTEIN                                      | -0,13068398   |
| NGSITQWNNPAIQAL  | PERIPLASMIC PHOSPHATE-BINDING LIPOPROTEIN PSTS3 YP_177768          | -0,130904559  |

| Peptides         | Protein                                                                | Average Index |
|------------------|------------------------------------------------------------------------|---------------|
| LSEGDMAAHKGLMNI  | PERIPLASMIC PHOSPHATE-BINDING LIPOPROTEIN PSTS1 YP_177770              | -0,131356405  |
| VVLEKKWGAAPTITND | 60 kDa chaperonin 2 P0A521                                             | -0,131755035  |
| IYNNRAERQILIDNN  | PPE FAMILY PROTEIN CAE55489                                            | -0,131762821  |
| GDMAAHKGLMNIALA  | PERIPLASMIC PHOSPHATE-BINDING LIPOPROTEIN PSTS1 YP_177770              | -0,131978597  |
| AIPGFALPGLPSIP   | CAB06237.1; CONSERVED HYPOTHETICAL PROTEIN                             | -0,132006213  |
| LYGNAGGLGPTQGHF  | PPE FAMILY PROTEIN CAE55334                                            | -0,132337877  |
| LNPGVNLPGTAVVPL  | PERIPLASMIC PHOSPHATE-BINDING LIPOPROTEIN PSTS1 YP_177770              | -0,132574675  |
| ITGQFRFGPITVSNV  | YP_177963; PPE FAMILY PROTEIN                                          | -0,132847914  |
| AGTAASQRQGEGTVL  | CAB06237.1; CONSERVED HYPOTHETICAL PROTEIN                             | -0,133416602  |
| ALATNGAAIGIGLVA  | MCE-FAMILY PROTEIN MCE1AYP_177701                                      | -0,133715758  |
| LAAGTLVLTACGGGT  | PERIPLASMIC PHOSPHATE-BINDING LIPOPROTEIN PSTS2 YP_177769              | -0,133805408  |
| QGNDRRAPKAVKEY   | PROBABLE ISOCITRATE DEHYDROGENASE CAA16247                             | -0,134004055  |
| INIDKLRQLDAEFCG  | SECRETED L-ALANINE DEHYDROGENASE ALD CAA15575                          | -0,134215152  |
| LDIHETMVIPIVFL   | YP_177963; PPE FAMILY PROTEIN                                          | -0,134355053  |
| FPGGLLPSTQAIIDI  | PUTATIVE CYCLOPROPANE-FATTY-ACYL-PHOSPHOLIPID SYNTHASE UFAA1 NP_854118 | -0,134768309  |
| ADTGLSQSESGIAGA  | TRANSMEMBRANE SERINE/THREONINE-PROTEIN KINASE D PKND NP_215446         | -0,135349276  |
| AAASAIQGNVTSIHS  | CAE55648                                                               | -0,135590958  |
| NIGFGNTGTNNLGIG  | YP_177963; PPE FAMILY PROTEIN                                          | -0,135591973  |
| DDALKVVEQASLRAG  | HYPOTHETICAL PROTEIN RV2623 NP_217139                                  | -0,13563172   |
| SFAERGVTLGAAFGG  | MYCOBACTERIUM BOVIS MYCOCEROSIC ACID SYNTHASE GENE; M95808             | -0,135751614  |
| NNGNGARVQRVVGSA  | CAB09453.1; PROBABLE SERINE PROTEASE PEPA                              | -0,136124541  |
| GRALIATGEQVLVNE  | CONSERVED HYPOTHETICAL PROTEIN CAB08634                                | -0,136437708  |
| GEKRIPLDVAEGDTV  | CAB01005.1; 10 KDA CHAPERONIN GROES                                    | -0,136620178  |
| AFVDSLTSQVGGRSI  | PROBABLE CUTINASE PRECURSOR CFP21 NP_216500                            | -0,136781366  |
| ANGMGATVTVLDINI  | SECRETED L-ALANINE DEHYDROGENASE ALD CAA15575                          | -0,136870502  |
| PLGHEERRTAVLDPD  | MYCOBACTERIUM BOVIS MYCOCEROSIC ACID SYNTHASE GENE; M95808             | -0,137038306  |
| FGPITVSNVQLNPFN  | YP_177963; PPE FAMILY PROTEIN                                          | -0,137765691  |
| PVNYQNFAVTNDGVI  | CAA98382.1; IMMUNOGENIC PROTEIN MPT64                                  | -0,137874703  |
| SPPAQALGGGVGAFL  | YP_177963; PPE FAMILY PROTEIN                                          | -0,137888861  |
| ARTISEAGQAMASTE  | CAE55648                                                               | -0,138211116  |
| AAAARSADVVCNNGS  | POSSIBLE GLYCOSYL TRANSFERASE CAB05415                                 | -0,138685703  |
| TVSKVAVSVGDVIQA  | CAB08316.1; BIOTINYLATED PROTEIN TB7.3                                 | -0,138932983  |
| AEPDTADRLVSAATA  | MYCOBACTERIUM BOVIS MYCOCEROSIC ACID SYNTHASE GENE; M95808             | -0,139445217  |
| FPKYPLNVFATANAI  | PPE FAMILY PROTEIN CAE55504                                            | -0,139492397  |
| STLGSAPAVISGFNG  | YP_177963; PPE FAMILY PROTEIN                                          | -0,139765803  |
| GEAAEVRDITFEQML  | MYCOBACTERIUM BOVIS MYCOCEROSIC ACID SYNTHASE GENE; M95808             | -0,13979172   |
| AGTVNIGASDAYLSE  | PERIPLASMIC PHOSPHATE-BINDING LIPOPROTEIN PSTS1 YP_177770              | -0,139818243  |
| IVLGGYSQGATVIDL  | PROBABLE CUTINASE PRECURSOR CFP21 NP_216500                            | -0,139830902  |
| AVLLEPHACVAASAQ  | MYCOBACTERIUM BOVIS MYCOCEROSIC ACID SYNTHASE GENE; M95808             | -0,140259748  |
| AKEKPQEGTVVAVGP  | CAB01005.1; 10 KDA CHAPERONIN GROES                                    | -0,140458222  |
| ISAQQVNYNLPGVSE  | PERIPLASMIC PHOSPHATE-BINDING LIPOPROTEIN PSTS1 YP_177770              | -0,14061412   |
| TPYVGWLAATAALAK  | PPE FAMILY PROTEIN CAE55334                                            | -0,14078034   |
| YVAADAAAASYTGF   | CONSERVED HYPOTHETICAL PROTEIN TB9.8 CAD93159                          | -0,141167914  |
| GNFGLFNQSGSFNTGI | YP_177963; PPE FAMILY PROTEIN                                          | -0,141435078  |
| EYGLLRGSWLTMIRL  | POSSIBLE HEMOLYSIN CAA16235                                            | -0,141567374  |
| AAGAQLVGTADQVWA  | SECRETED L-ALANINE DEHYDROGENASE ALD CAA15575                          | -0,141912976  |
| NARDELQAQIDKWHR  | MTB81 (publication)                                                    | -0,142558533  |
| VDQGLQRRDPRWEAD  | MYCOBACTERIUM BOVIS MYCOCEROSIC ACID SYNTHASE GENE; M95808             | -0,143046173  |
| QPLGKAQFGGQRFQ   | RNA POLYMERASE BETA-SUBUNIT AAA21416                                   | -0,143339431  |
| PIDAGTAASQRQGEQ  | CAB06237.1; CONSERVED HYPOTHETICAL PROTEIN                             | -0,143359944  |
| VYATLTGSGGRNLLQ  | POSSIBLE GLYCOSYL TRANSFERASE CAB05415                                 | -0,143540252  |
| SGYFADTDGIPPPNS  | MYCOBACTERIUM BOVIS ACYL-COA SYNTHASE GENE; U75685                     | -0,143917417  |
| GYHEFFHACTAVAAI  | POSSIBLE HEMOLYSIN-LIKE PROTEIN CAA17201                               | -0,144096138  |
| EDEEGVAEAERAPID  | CAB06237.1; CONSERVED HYPOTHETICAL PROTEIN                             | -0,144276731  |
| LPVRIGGHLLLEFDH  | 3-OXOACYL-[ACYL-CARRIER PROTEIN] SYNTHASE 2 KASB CAA94642              | -0,14450529   |
| STGLFNAGNFNTGVA  | YP_177963; PPE FAMILY PROTEIN                                          | -0,144623456  |
| GILSAAFAAPAQAN   | CONSERVED HYPOTHETICAL PROTEIN CAA15739                                | -0,144655231  |
| GVADLVPTATLLDTY  | MCE-FAMILY PROTEIN MCE1AYP_177701                                      | -0,145027233  |
| NTGNANTGVANSGNV  | YP_177963; PPE FAMILY PROTEIN                                          | -0,145205874  |
| SGIRTLDDPFVEEFD  | 3-OXOACYL-[ACYL-CARRIER PROTEIN] SYNTHASE 2 KASB CAA94642              | -0,145387326  |
| GPVHAVFNAASQAFN  | YP_177963; PPE FAMILY PROTEIN                                          | -0,145728112  |
| PNGYTFKEDEYPSTA  | MYCOBACTERIUM BOVIS ACYL-COA SYNTHASE GENE; U75685                     | -0,145756358  |

| Peptides         | Protein                                                        | Average Index |
|------------------|----------------------------------------------------------------|---------------|
| TSGKVRRGACVEQYR  | MYCOBACTERIUM BOVIS ACYL-COA SYNTHASE GENE; U75685             | -0,146267325  |
| VAANILGQNSAAIAA  | PPE FAMILY PROTEIN CAE55334                                    | -0,146472508  |
| GDVITAVDGAPINSA  | CAB09453.1; PROBABLE SERINE PROTEASE PEPA                      | -0,14649955   |
| AGDIAGLGQGRAGGG  | MTB48 AAK31576                                                 | -0,146824298  |
| VSSPDVLTYYILLPS  | PPE FAMILY PROTEIN CAE55504                                    | -0,146846528  |
| TSTAPNAAPEPVARR  | POSSIBLE GLYCOSYL TRANSFERASE CAB05418                         | -0,147328495  |
| QANAHGQKQQAAGNN  | PUTATIVE ESAT-6 LIKE PROTEIN ESXN YP_177838                    | -0,147794105  |
| TANGSGAGISEFNGN  | PERIPLASMIC PHOSPHATE-BINDING LIPOPROTEIN PSTS3 YP_177768      | -0,148369335  |
| DVSPRQMVSVATAMI  | RNA POLYMERASE BETA-SUBUNIT AAA21416                           | -0,148418571  |
| ANAGNVNTGALITGN  | YP_177963; PPE FAMILY PROTEIN                                  | -0,148440964  |
| GFLMPPSDGSGVTPG  | MTB48 AAK31576                                                 | -0,149596083  |
| ARTPAHAAHHLVEGV  | POSSIBLE HEMOLYSIN-LIKE PROTEIN CAA17201                       | -0,149624333  |
| GWLNTGNTNTGIANS  | YP_177963; PPE FAMILY PROTEIN                                  | -0,149842336  |
| DQNVTVGSVVCCTAAG | LIPOPROTEIN LPQH PRECURSOR P0A5J0                              | -0,150037272  |
| QASSPMVGTLSGLGN  | YP_177963; PPE FAMILY PROTEIN                                  | -0,150228784  |
| TAVVPLHRSDGSGDT  | PERIPLASMIC PHOSPHATE-BINDING LIPOPROTEIN PSTS1 YP_177770      | -0,150301544  |
| GEADAAICGGVETRI  | 3-OXOACYL-[ACYL-CARRIER PROTEIN] SYNTHASE 2 KASB CAA94642      | -0,150309891  |
| VDPVKLNLTLASAAE  | MCE-FAMILY PROTEIN MCE1AYP_177701                              | -0,150569316  |
| SPLALNTNGAAIG    | MCE-FAMILY PROTEIN MCE1AYP_177701                              | -0,150593753  |
| GAAPAGAAVEAAEEQ  | CAB07109.1; PROBABLE 50S RIBOSOMAL PROTEIN L7/L12 RPLL         | -0,15093326   |
| AKIMGQGNLVLDT    | PERIPLASMIC PHOSPHATE-BINDING LIPOPROTEIN PSTS2 YP_177769      | -0,152272411  |
| ARMQREADTAGRLTE  | TRANSMEMBRANE SERINE/THREONINE-PROTEIN KINASE D PKND NP_215446 | -0,15242811   |
| VVPVLNARFALNAAN  | MTB81 (publication)                                            | -0,15271346   |
| WPGRLLGSVSSGLLR  | HYPOTHETICAL PROTEIN RV2623 NP_217139                          | -0,152754188  |
| PHIVPIHDYGEINGQ  | TRANSMEMBRANE SERINE/THREONINE-PROTEIN KINASE D PKND NP_215446 | -0,15301679   |
| VVVTKVDDRPINSAD  | CAA17582.1; PROBABLE SERINE PROTEASE PEPD                      | -0,153402863  |
| AVVVCNGGSLTTQQA  | POSSIBLE GLYCOSYL TRANSFERASE CAB05415                         | -0,1534697    |
| QRDVMAREVAVDVAS  | MYCOBACTERIUM BOVIS MYCOCEROSIC ACID SYNTHASE GENE; M95808     | -0,153609057  |
| VTVGPIILINGVNIPA | YP_177963; PPE FAMILY PROTEIN                                  | -0,15377046   |
| AGVQYSRADEEQQQA  | CAA17966.1; 10 KDA CULTURE FILTRATE ANTIGEN ESXB               | -0,153780467  |
| ASLRAGPPTVHSEIV  | HYPOTHETICAL PROTEIN RV2623 NP_217139                          | -0,154388961  |
| MFGYHSAASAVATQL  | PPE FAMILY PROTEIN CAE55504                                    | -0,154727107  |
| PAAPVTTAAMADPAA  | CAA98350.1; CELL SURFACE LIPOPROTEIN MPT83                     | -0,155135148  |
| VDFDTELSAGHAKP   | MYCOBACTERIUM BOVIS ACYL-COA SYNTHASE GENE; U75685             | -0,155488219  |
| ACQIQMSDPAYNINI  | CAA98382.1; IMMUNOGENIC PROTEIN MPT64                          | -0,155585469  |
| TRGLQHRGKLDGTPE  | CAA17111.1; PROBABLE ISOCITRATE DEHYDROGENASE                  | -0,155650973  |
| TVAGPLAASDRGGNW  | TRANSMEMBRANE SERINE/THREONINE-PROTEIN KINASE D PKND NP_215446 | -0,155736549  |
| TDIAGRVAQIRQEI   | 60 kDa chaperonin 2 P0A521                                     | -0,155897569  |
| ITVWNDPQIQALNSG  | PERIPLASMIC PHOSPHATE-BINDING LIPOPROTEIN PSTS2 YP_177769      | -0,155904103  |
| VALEAPLKQIAFNNG  | 60 kDa chaperonin 2 P0A521                                     | -0,155982326  |
| AARLPDELLEAHANA  | RNA POLYMERASE BETA-SUBUNIT AAA21416                           | -0,156109294  |
| RQFLTEIGYLLPEPD  | MTB81 (publication)                                            | -0,156250054  |
| PGRIHVVFSDDES    | PERIPLASMIC PHOSPHATE-BINDING LIPOPROTEIN PSTS3 YP_177768      | -0,156677109  |
| VSILQPFTVAPINLN  | YP_177963; PPE FAMILY PROTEIN                                  | -0,156853772  |
| GRIVLTARSQPNPKA  | MYCOBACTERIUM BOVIS MYCOCEROSIC ACID SYNTHASE GENE; M95808     | -0,156875678  |
| SVRPAGAGDIAGLGQ  | MTB48 AAK31576                                                 | -0,156977182  |
| PFTGLNDPDPGVAVDN | TRANSMEMBRANE SERINE/THREONINE-PROTEIN KINASE D PKND NP_215446 | -0,157000245  |
| GQNSAAIAATQAEYA  | PPE FAMILY PROTEIN CAE55334                                    | -0,157101811  |
| QREADTAGRLTEPHI  | TRANSMEMBRANE SERINE/THREONINE-PROTEIN KINASE D PKND NP_215446 | -0,157181758  |
| KMEIPVLAAEAGTVS  | CAB08316.1; BIOTINYLATED PROTEIN TB7.3                         | -0,157397333  |
| ELPSSGFFNTGGGGG  | YP_177963; PPE FAMILY PROTEIN                                  | -0,157760609  |
| QTTMTVPGGVEVPVE  | RNA POLYMERASE BETA-SUBUNIT AAA21416                           | -0,157892817  |
| LTTAHTPRRPRRCW   | MYCOBACTERIUM BOVIS MYCOCEROSIC ACID SYNTHASE GENE; M95808     | -0,157918102  |
| RHAEFRLENNEFNVV  | CAB01474.1; CONSERVED HYPOTHETICAL PROTEIN CFP17               | -0,158220641  |
| GPTYNKVRGDKVIAY  | MTB81 (publication)                                            | -0,158512798  |
| SYNTGVGNAGTASTG  | YP_177963; PPE FAMILY PROTEIN                                  | -0,158803081  |
| PDKSTGLANPGQFAG  | MTB81 (publication)                                            | -0,158807036  |
| GDVLVDADGKAMLFD  | RNA POLYMERASE BETA-SUBUNIT AAA21416                           | -0,158814971  |
| RALAMSNLLGQNAAA  | YP_177963; PPE FAMILY PROTEIN                                  | -0,15916758   |
| FNSGDGGVSGFGNFG  | YP_177963; PPE FAMILY PROTEIN                                  | -0,159729494  |

| Peptides         | Protein                                                                | Average Index |
|------------------|------------------------------------------------------------------------|---------------|
| RYKVNKKLGLHVGEF  | RNA POLYMERASE BETA-SUBUNIT AAA21416                                   | -0,159813284  |
| PVCDGAYWVDNLRNT  | MYCOBACTERIUM BOVIS MYCOCEROSIC ACID SYNTHASE GENE; M95808             | -0,159866261  |
| NLKFQDAYNAAGGHN  | CAB10044.1; SECRETED ANTIGEN 85-B FBPB (85B)                           | -0,159896506  |
| ADTLAEQAAAPAAAS  | MYCOBACTERIUM BOVIS MYCOCEROSIC ACID SYNTHASE GENE; M95808             | -0,160133407  |
| EYPSTAYLQYTSGST  | MYCOBACTERIUM BOVIS ACYL-COA SYNTHASE GENE; U75685                     | -0,160320323  |
| EQSTGKIYFDTVGPS  | CAB06500.1; IMMUNOGENIC PROTEIN MPT63                                  | -0,160671095  |
| GLSQSESGIAGAGTG  | TRANSMEMBRANE SERINE/THREONINE-PROTEIN KINASE D PKND NP_215446         | -0,160800792  |
| GSTAQANAMTRFVNV  | PERIPLASMIC PHOSPHATE-BINDING LIPOPROTEIN PSTS3 YP_177768              | -0,160972243  |
| ELKGTDTGQACQIQM  | CAA98382.1; IMMUNOGENIC PROTEIN MPT64                                  | -0,161056457  |
| AMNRGVDLATGTWLL  | POSSIBLE GLYCOSYL TRANSFERASE CAB05419                                 | -0,161100481  |
| GVVAEKVRNLPAGHG  | 60 kDa chaperonin 2 P0A521                                             | -0,162246394  |
| TVAQLARTPVIVARE  | HYPOTHETICAL PROTEIN RV2623 NP_217139                                  | -0,162411059  |
| DTAAQLTSAGREAAA  | MTB48 AAK31576                                                         | -0,162495465  |
| VAANLLGQNAPAIAA  | PPE FAMILY PROTEIN CAE55504                                            | -0,162587448  |
| SRSVEFAEQIRRDTD  | MYCOBACTERIUM BOVIS MYCOCEROSIC ACID SYNTHASE GENE; M95808             | -0,162749234  |
| AASAAIANRLLRRTA  | PUTATIVE CYCLOPROPANE-FATTY-ACYL-PHOSPHOLIPID SYNTHASE UFAA1 NP_854118 | -0,16276827   |
| AEDDCPPPGYDITAL  | MYCOBACTERIUM BOVIS MYCOCEROSIC ACID SYNTHASE GENE; M95808             | -0,162946063  |
| VGETVAQLARTPVIV  | HYPOTHETICAL PROTEIN RV2623 NP_217139                                  | -0,16335628   |
| PWEGHNYEDAIIASN  | RNA POLYMERASE BETA-SUBUNIT AAA21416                                   | -0,163373724  |
| EITGSTLVLDINETLN | YP_177963; PPE FAMILY PROTEIN                                          | -0,163666766  |
| ALVTRYMHVVVASYN  | POSSIBLE GLYCOSYL TRANSFERASE CAB05419                                 | -0,164140148  |
| GAGTVYVTDNFNRVV  | TRANSMEMBRANE SERINE/THREONINE-PROTEIN KINASE D PKND NP_215446         | -0,164182955  |
| WVPSPTAATLHALHY  | MTB81 (publication)                                                    | -0,164380349  |
| AELPVTVIAATAGRS  | POSSIBLE GLYCOSYL TRANSFERASE CAB05415                                 | -0,164764006  |
| VTVTGQGNSLVGNNA  | CAA98373.1; MAJOR SECRETED IMMUNOGENIC PROTEIN                         | -0,165195577  |
| HDMGLVIGICAPILG  | MYCOBACTERIUM BOVIS ACYL-COA SYNTHASE GENE; U75685                     | -0,165375005  |
| TDGAEEKGPTYNKVRG | MTB81 (publication)                                                    | -0,165450526  |
| LIQAGAGEGSAITDA  | SECRETED L-ALANINE DEHYDROGENASE ALD CAA15575                          | -0,165535247  |
| ISFLDQASQRGLGEA  | PERIPLASMIC PHOSPHATE-BINDING LIPOPROTEIN PSTS1 YP_177770              | -0,165855897  |
| DKLRQLDAEFCGRIH  | SECRETED L-ALANINE DEHYDROGENASE ALD CAA15575                          | -0,165906086  |
| TTTAGGLASPYVVTG  | MYCOBACTERIUM BOVIS MYCOCEROSIC ACID SYNTHASE GENE; M95808             | -0,166064423  |
| ATISGVGNDLVLDTD  | PERIPLASMIC PHOSPHATE-BINDING LIPOPROTEIN PSTS3 YP_177768              | -0,166205292  |
| PAVGQRGRALIATGE  | CONSERVED HYPOTHETICAL PROTEIN CAB08634                                | -0,166650523  |
| AAHHLVEGVARVLTK  | POSSIBLE HEMOLYSIN-LIKE PROTEIN CAA17201                               | -0,16682181   |
| EAKAKLEAAGATVTV  | CAB07109.1; PROBABLE 50S RIBOSOMAL PROTEIN L7/L12 RPLL                 | -0,167679504  |
| FDELRIGLATAEDIR  | RNA POLYMERASE BETA-SUBUNIT AAA21417                                   | -0,168201686  |
| AGVPKGVVVTKVDDR  | CAA17582.1; PROBABLE SERINE PROTEASE PEPD                              | -0,16850789   |
| GSIPITTSKVKRRGA  | MYCOBACTERIUM BOVIS ACYL-COA SYNTHASE GENE; U75685                     | -0,16851624   |
| AGSKTQTVLPFTGLN  | TRANSMEMBRANE SERINE/THREONINE-PROTEIN KINASE D PKND NP_215446         | -0,168875206  |
| DEEAATALDNDGEGT  | MTB48 AAK31576                                                         | -0,169842232  |
| HQGESSAAFQAAHAR  | CONSERVED HYPOTHETICAL PROTEIN TB9.8 CAD93159                          | -0,169918513  |
| TQYLSKQDPEGWGKS  | PERIPLASMIC PHOSPHATE-BINDING LIPOPROTEIN PSTS1 YP_177770              | -0,17014789   |
| ALGPGLSRERAGLE   | RNA POLYMERASE BETA-SUBUNIT AAA21416                                   | -0,170419999  |
| GRGSLAAQGLAEVC   | CONSERVED HYPOTHETICAL PROTEIN CAB08634                                | -0,170522327  |
| VGSVNVGFGNVGDFN  | YP_177963; PPE FAMILY PROTEIN                                          | -0,172040934  |
| SRMYSGPGPESMLAA  | PPE FAMILY PROTEIN CAE55334                                            | -0,17213996   |
| QVLVNEHLIGPPPAT  | CONSERVED HYPOTHETICAL PROTEIN CAB08634                                | -0,172233058  |
| DVILESAITTIMDFE  | MTB81 (publication)                                                    | -0,172312376  |
| ATANAIAIGILFLHSG | PPE FAMILY PROTEIN CAE55504                                            | -0,172618421  |
| PKARQTIEGLRAAGA  | MYCOBACTERIUM BOVIS MYCOCEROSIC ACID SYNTHASE GENE; M95808             | -0,17307117   |
| LVLVFLVVALVYLQ   | MCE-FAMILY PROTEIN MCE1AYP_177701                                      | -0,173154198  |
| NISGIEIKDLAGNVT  | YP_177963; PPE FAMILY PROTEIN                                          | -0,17329711   |
| DGASNGAWGKGASET  | PERIPLASMIC PHOSPHATE-BINDING LIPOPROTEIN PSTS2 YP_177769              | -0,173513482  |
| FTGLNSLTYDVSAQ   | PPE FAMILY PROTEIN CAE55504                                            | -0,173632312  |
| SPSMGRDIKVFQSG   | CAB10044.1; SECRETED ANTIGEN 85-B FBPB (85B)                           | -0,173686107  |
| QIRQEINSDSDYDR   | 60 kDa chaperonin 2 P0A521                                             | -0,173714186  |
| EGVAEAERAPIDAGT  | CAB06237.1; CONSERVED HYPOTHETICAL PROTEIN                             | -0,174089635  |
| NGPLINSRTGSIYIV  | MTB81 (publication)                                                    | -0,174329577  |
| TLPQRVAVRVSQLHA  | CONSERVED HYPOTHETICAL PROTEIN CAB08634                                | -0,174382013  |
| AGVGAVAMSLTVGAG  | LOW MOLECULAR WEIGHT T-CELL ANTIGEN TB8.4 NP_215690                    | -0,174667565  |
| GTPPFDLPTVVIDRI  | YP_177963; PPE FAMILY PROTEIN                                          | -0,175322473  |

| Peptides         | Protein                                                        | Average Index |
|------------------|----------------------------------------------------------------|---------------|
| VGLANMGVGNIGFAN  | YP_177963; PPE FAMILY PROTEIN                                  | -0,175552847  |
| QAVAVAGQARAATAA  | YP_177963; PPE FAMILY PROTEIN                                  | -0,176007652  |
| FIINGTERVVVSQLV  | RNA POLYMERASE BETA-SUBUNIT AAA21416                           | -0,176379147  |
| AQANAMTRFVNVEFQ  | PERIPLASMIC PHOSPHATE-BINDING LIPOPROTEIN PSTS3 YP_177768      | -0,176452313  |
| VNREPVDASVLANGD  | CAB01474.1; CONSERVED HYPOTHETICAL PROTEIN CFP17               | -0,176719411  |
| VTALVLLFVGALYS   | POSSIBLE HEMOLYSIN-LIKE PROTEIN CAA17201                       | -0,177355028  |
| VVTKDETTIVEGAGD  | 60 kDa chaperonin 2 P0A521                                     | -0,17778984   |
| PNDQAGLEKLGSQLR  | MYCOBACTERIUM BOVIS MYCOCEROSIC ACID SYNTHASE GENE; M95808     | -0,178096027  |
| TLIVGELGEATVVTG  | CONSERVED HYPOTHETICAL PROTEIN CAB08634                        | -0,17816478   |
| DVPRITILDAHFTGA  | YP_177963; PPE FAMILY PROTEIN                                  | -0,178168608  |
| GLGNAGSTNVGLANM  | YP_177963; PPE FAMILY PROTEIN                                  | -0,178247557  |
| TFEQMLLLDEQTPID  | MYCOBACTERIUM BOVIS MYCOCEROSIC ACID SYNTHASE GENE; M95808     | -0,178678408  |
| GIGLTGDNQTGFQGL  | YP_177963; PPE FAMILY PROTEIN                                  | -0,179362769  |
| KRGPNAGSRFLLDQA  | CAB01474.1; CONSERVED HYPOTHETICAL PROTEIN CFP17               | -0,179376465  |
| EKKWGAAPTITNDGVS | 60 kDa chaperonin 2 P0A521                                     | -0,180000181  |
| APTNAAFSKLPASTI  | CAA98373.1; MAJOR SECRETED IMMUNOGENIC PROTEIN                 | -0,180242336  |
| AALDAAHANGVTHRD  | TRANSMEMBRANE SERINE/THREONINE-PROTEIN KINASE D PKND NP_215446 | -0,180454063  |
| DSVPLSSGSFGDATG  | MTB81 (publication)                                            | -0,181167505  |
| EAAEEQSEFDVILEA  | CAB07109.1; PROBABLE 50S RIBOSOMAL PROTEIN L7/L12 RPLL         | -0,181259416  |
| NGARVQRVVSAPAA   | CAB09453.1; PROBABLE SERINE PROTEASE PEPA                      | -0,181431772  |
| CEMALAAAAEVFGEA  | MYCOBACTERIUM BOVIS MYCOCEROSIC ACID SYNTHASE GENE; M95808     | -0,181748304  |
| SGIGGLNSGTGNIGL  | YP_177963; PPE FAMILY PROTEIN                                  | -0,181944102  |
| QPARQLVQRSEEAQL  | HYPOTHETICAL PROTEIN RV2623 NP_217139                          | -0,182018663  |
| LHGPAMTFDTACSSG  | MYCOBACTERIUM BOVIS MYCOCEROSIC ACID SYNTHASE GENE; M95808     | -0,182697404  |
| GRVVKLATGSTGTTV  | TRANSMEMBRANE SERINE/THREONINE-PROTEIN KINASE D PKND NP_215446 | -0,183194815  |
| VPGDRRTEKLVAIIE  | MYCOBACTERIUM BOVIS ACYL-COA SYNTHASE GENE; U75685             | -0,183312397  |
| GNSSLGIIVGIDDSP  | HYPOTHETICAL PROTEIN RV2623 NP_217139                          | -0,183336069  |
| ASDNFQLSQGGQGFA  | CAB09453.1; PROBABLE SERINE PROTEASE PEPA                      | -0,183746451  |
| QIAAALDAAHANGVT  | TRANSMEMBRANE SERINE/THREONINE-PROTEIN KINASE D PKND NP_215446 | -0,183981199  |
| SYPIVLATYEIVCSK  | PERIPLASMIC PHOSPHATE-BINDING LIPOPROTEIN PSTS2 YP_177769      | -0,184063983  |
| MSQDPVAVAASNPE   | CAA98373.1; MAJOR SECRETED IMMUNOGENIC PROTEIN                 | -0,184308118  |
| IVLGEADAAICGGVE  | 3-OXOACYL-[ACYL-CARRIER PROTEIN] SYNTHASE 2 KASB CAA94642      | -0,184557393  |
| GVGCSKVPDIHDVAL  | MTB81 (publication)                                            | -0,184646413  |
| LGGLPVGQMGARAGG  | CAE55371.1; PPE FAMILY PROTEIN                                 | -0,185189268  |
| SGLGAALGIGNIGLG  | YP_177963; PPE FAMILY PROTEIN                                  | -0,185317316  |
| GAGNVGQQLSGVLAA  | YP_177963; PPE FAMILY PROTEIN                                  | -0,185699577  |
| HQQGGGAKSKGSQQE  | MTB48 AAK31576                                                 | -0,186306672  |
| EDKILVQANEATT    | CAB01005.1; 10 KDA CHAPERONIN GROES                            | -0,187082519  |
| VIDVRSVTTEINTLF  | MCE-FAMILY PROTEIN MCE1AYP_177701                              | -0,18717068   |
| RNHSPDDIETIQEI   | MYCOBACTERIUM BOVIS ACYL-COA SYNTHASE GENE; U75685             | -0,187767166  |
| DLALMSVTQPDRVRE  | MYCOBACTERIUM BOVIS MYCOCEROSIC ACID SYNTHASE GENE; M95808     | -0,188954778  |
| SQVRLDTAVQGIEGT  | CONSERVED HYPOTHETICAL PROTEIN TB18.5CAD93033                  | -0,188976824  |
| NLGGGNLGGQNLGLG  | YP_177963; PPE FAMILY PROTEIN                                  | -0,189049876  |
| AVAIVRQIAALDAA   | TRANSMEMBRANE SERINE/THREONINE-PROTEIN KINASE D PKND NP_215446 | -0,189141473  |
| SVASGRIHTLGLHG   | MYCOBACTERIUM BOVIS MYCOCEROSIC ACID SYNTHASE GENE; M95808     | -0,189362527  |
| ERLRWLVAEAGPFAS  | CONSERVED HYPOTHETICAL PROTEIN CAB08634                        | -0,189386175  |
| GNSGTGSTGLFNAGG  | YP_177963; PPE FAMILY PROTEIN                                  | -0,189806468  |
| GTLVLTACGGGTNNS  | PERIPLASMIC PHOSPHATE-BINDING LIPOPROTEIN PSTS2 YP_177769      | -0,190279654  |
| LNRPVSTTGEAGNQN  | CAA17582.1; PROBABLE SERINE PROTEASE PEPD                      | -0,190605308  |
| NVGLGNVGGGNVGF   | YP_177963; PPE FAMILY PROTEIN                                  | -0,19087812   |
| TSGSVHCGGKKELHS  | PERIPLASMIC PHOSPHATE-BINDING LIPOPROTEIN PSTS2 YP_177769      | -0,190900029  |
| ALGDNWIVGASNSTG  | YP_177963; PPE FAMILY PROTEIN                                  | -0,191137569  |
| NVSGISGLYNTAIV   | YP_177963; PPE FAMILY PROTEIN                                  | -0,191363902  |
| GRAPSASELAELGM   | ALTERNATE RNA POLYMERASE SIGMA FACTOR SIGF CAB07069            | -0,191716453  |
| PASSPVTLAETGSTL  | PERIPLASMIC PHOSPHATE-BINDING LIPOPROTEIN PSTS1 YP_177770      | -0,191960965  |
| AVAGQARAATAAFAEA | YP_177963; PPE FAMILY PROTEIN                                  | -0,192398528  |
| TVIGARDLMMVNNAG  | CAA98350.1; CELL SURFACE LIPOPROTEIN MPT83                     | -0,192963455  |
| FDFLDSSVTTARTIN  | MCE-FAMILY PROTEIN MCE1AYP_177701                              | -0,19325808   |
| RSIGVYAVNYPASDD  | PROBABLE CUTINASE PRECURSOR CFP21 NP_216500                    | -0,193421756  |
| NIGDANFGFGNSGLA  | YP_177963; PPE FAMILY PROTEIN                                  | -0,193984792  |
| NDDNVTGGGATTGQA  | PERIPLASMIC PHOSPHATE-BINDING LIPOPROTEIN PSTS3 YP_177768      | -0,194112633  |

| Peptides          | Protein                                                                | Average Index |
|-------------------|------------------------------------------------------------------------|---------------|
| LVDAADPEVVFVSGE   | CONSERVED HYPOTHETICAL PROTEIN CAB08634                                | -0,194210922  |
| PGPDAGTSTAPNAAP   | POSSIBLE GLYCOSYL TRANSFERASE CAB05418                                 | -0,194432593  |
| AAESPTSVLLINHGL   | MTB81 (publication)                                                    | -0,194488549  |
| AGWNGYGDFQHTTEE   | CONSERVED HYPOTHETICAL PROTEIN CAB08634                                | -0,194797179  |
| GGNRPAVYAPKSALG   | 3-OXOACYL-[ACYL-CARRIER PROTEIN] SYNTHASE 2 KASB CAA94642              | -0,194933864  |
| GLDSLGMLEMRTHVE   | MYCOBACTERIUM BOVIS MYCOCEROSIC ACID SYNTHASE GENE; M95808             | -0,195298368  |
| AVGKQLNMAQIITSA   | PERIPLASMIC PHOSPHATE-BINDING LIPOPROTEIN PSTS2 YP_177769              | -0,195492888  |
| TGQHTGLRIVDAASL   | PUTATIVE CYCLOPROPANE-FATTY-ACYL-PHOSPHOLIPID SYNTHASE UFAA1 NP_854118 | -0,195668808  |
| SEFAYGSFVRTVSLP   | CAA17245.1; HEAT SHOCK PROTEIN HSPX                                    | -0,195697659  |
| QVGPQVVNINTKLG    | CAB09453.1; PROBABLE SERINE PROTEASE PEPA                              | -0,195969943  |
| CSKVPDIHDVALMED   | MTB81 (publication)                                                    | -0,196403741  |
| RAGHAITRAIQLAGL   | 3-OXOACYL-[ACYL-CARRIER PROTEIN] SYNTHASE 2 KASB CAA94642              | -0,19704933   |
| LPFNGLYQPQGLAVD   | TRANSMEMBRANE SERINE/THREONINE-PROTEIN KINASE D PKND NP_215446         | -0,197055451  |
| LNLGASVTVGPIILIN  | YP_177963; PPE FAMILY PROTEIN                                          | -0,197522397  |
| SDTRDVL RAMKKMID  | CAB06237.1; CONSERVED HYPOTHETICAL PROTEIN                             | -0,197886951  |
| NPGNSGGALVNMQNAQ  | CAA17582.1; PROBABLE SERINE PROTEASE PEPD                              | -0,197889885  |
| VHKPVTAGWNGYGDF   | CONSERVED HYPOTHETICAL PROTEIN CAB08634                                | -0,198164543  |
| ANAFVADYLPGEAAA   | POSSIBLE GLYCOSYL TRANSFERASE CAB05415                                 | -0,198587808  |
| DLIGRGCAQYAAQNP   | CAA98350.1; CELL SURFACE LIPOPROTEIN MPT83                             | -0,19868501   |
| KDETTIVEGAGDTDA   | 60 kDa chaperonin 2 P0A521                                             | -0,199091359  |
| TFEVTAAAPVAVAAA   | CAB07109.1; PROBABLE 50S RIBOSOMAL PROTEIN L7/L12 RPLL                 | -0,199326778  |
| GNIGLGNAGSTNVGL   | YP_177963; PPE FAMILY PROTEIN                                          | -0,199616561  |
| IPETDGAIEKGPITYNK | MTB81 (publication)                                                    | -0,200256229  |
| RSNPALAKGLSTHEG   | SECRETED L-ALANINE DEHYDROGENASE ALD CAA15575                          | -0,200688932  |
| QFEAAGLTIEHRLID   | CAA17111.1; PROBABLE ISOCITRATE DEHYDROGENASE                          | -0,200783355  |
| QRRKIDRLLDVAGVQ   | PUTATIVE CYCLOPROPANE-FATTY-ACYL-PHOSPHOLIPID SYNTHASE UFAA1 NP_854118 | -0,201313996  |
| LPAHVTSEIAIASYD   | CAA17343.1; HEAT SHOCK PROTEIN HSP                                     | -0,20139037   |
| GFEDIGIKTGNERAK   | PROBABLE ISOCITRATE DEHYDROGENASE CAA16247                             | -0,201585673  |
| VIGAGKPLIIAEDV    | 60 kDa chaperonin 2 P0A521                                             | -0,202139991  |
| RIYNAGDLFVGGNI    | YP_177963; PPE FAMILY PROTEIN                                          | -0,202408466  |
| QQGGQGHATLVSDKK   | CAB06237.1; CONSERVED HYPOTHETICAL PROTEIN                             | -0,202433603  |
| RTNSEILSGIGISLL   | MCE-FAMILY PROTEIN MCE1AYP_177701                                      | -0,20252313   |
| GDGGVSGFGNFGAGS   | YP_177963; PPE FAMILY PROTEIN                                          | -0,202531194  |
| LTGAPPYRADSVRL    | TRANSMEMBRANE SERINE/THREONINE-PROTEIN KINASE D PKND NP_215446         | -0,20314981   |
| GPIIPDTTILPPIH    | YP_177963; PPE FAMILY PROTEIN                                          | -0,203178905  |
| SAAAKNTPGSIITYNE  | PERIPLASMIC PHOSPHATE-BINDING LIPOPROTEIN PSTS3 YP_177768              | -0,203607282  |
| GSVAEAMARVPAARP   | TWO COMPONENT TRANSCRIPTIONAL REGULATORY PROTEIN DEVR NP_217649        | -0,203613672  |
| VSGLLNQASSPMVGT   | YP_177963; PPE FAMILY PROTEIN                                          | -0,203946653  |
| FAAIGHIGPISIPNI   | YP_177963; PPE FAMILY PROTEIN                                          | -0,204010804  |
| GNRIFAVVRGTATNQ   | MYCOBACTERIUM BOVIS MYCOCEROSIC ACID SYNTHASE GENE; M95808             | -0,204070681  |
| AFIGEHEPSDLVYGD   | POSSIBLE GLYCOSYL TRANSFERASE CAB05419                                 | -0,204591158  |
| AAVRSKAPGATVALT   | CAA17582.1; PROBABLE SERINE PROTEASE PEPD                              | -0,204896626  |
| APVLVGVDGSSASEL   | HYPOTHETICAL PROTEIN RV2623 NP_217139                                  | -0,20580806   |
| DLIQVARVGLVNAAY   | ALTERNATE RNA POLYMERASE SIGMA FACTOR SIGF CAB07069                    | -0,205969151  |
| MLQDMAITLGGQVIS   | 60 kDa chaperonin 2 P0A521                                             | -0,206320055  |
| DIEKDQTSDEVTVET   | CAB01474.1; CONSERVED HYPOTHETICAL PROTEIN CFP17                       | -0,206345846  |
| SGAEAIARAWQQIVL   | 3-OXOACYL-[ACYL-CARRIER PROTEIN] SYNTHASE 2 KASB CAA94642              | -0,206559738  |
| STAGSLQGQWRGAAG   | CAA17966.1; 10 KDA CULTURE FILTRATE ANTIGEN ESXB                       | -0,206759292  |
| IVAGGGVTLLQAAPT   | 60 kDa chaperonin 2 P0A521                                             | -0,206853614  |
| MKFARSGAAVSLLAA   | PERIPLASMIC PHOSPHATE-BINDING LIPOPROTEIN PSTS2 YP_177769              | -0,206989369  |
| DGVGYPVHKPVTAGW   | CONSERVED HYPOTHETICAL PROTEIN CAB08634                                | -0,207012946  |
| EVTRDGESAARKFILD  | MCE-FAMILY PROTEIN MCE1AYP_177701                                      | -0,207334144  |
| GTPALVSGLGNVGDH   | YP_177963; PPE FAMILY PROTEIN                                          | -0,207358249  |
| ADIERYPEWNEGVK    | CONSERVED HYPOTHETICAL PROTEIN TB18.5CAD93033                          | -0,207497725  |
| IHSLDEGKQSLTKL    | CAE55648                                                               | -0,208000981  |
| AGSGIANVGTLSHGV   | YP_177963; PPE FAMILY PROTEIN                                          | -0,208247175  |
| AAGTYVAADAAAST    | CONSERVED HYPOTHETICAL PROTEIN TB9.8 CAD93159                          | -0,208530638  |
| AAKAGLMRHTIGQAE   | CONSERVED HYPOTHETICAL PROTEIN TB9.8 CAD93159                          | -0,209047552  |
| DRAGVKDVILESAIT   | MTB81 (publication)                                                    | -0,209101714  |
| GGAAANAGVPGKVVV   | CAA17582.1; PROBABLE SERINE PROTEASE PEPD                              | -0,209154154  |

| Peptides         | Protein                                                                      | Average Index |
|------------------|------------------------------------------------------------------------------|---------------|
| PGQPLPTLPVPVLRD  | CAA16030.1; PROBABLE MOLYBDOPTERIN-GUANINE DINUCLEOTIDE BIOSYNTHESIS PROTEIN | -0,210373721  |
| TVLPFDGLNYPEGLA  | TRANSMEMBRANE SERINE/THREONINE-PROTEIN KINASE D PKND NP_215446               | -0,211207648  |
| PKTYCEELKGTDTGQ  | CAA98382.1; IMMUNOGENIC PROTEIN MPT64                                        | -0,211391828  |
| SLLSPLALATNGAAI  | MCE-FAMILY PROTEIN MCE1AYP_177701                                            | -0,211690617  |
| YLQFRGEFTPKTQLT  | MCE-FAMILY PROTEIN MCE1AYP_177701                                            | -0,211737674  |
| RVAQQLLSGSEEDET  | MYCOBACTERIUM BOVIS MYCOCEROSIC ACID SYNTHASE GENE; M95808                   | -0,211848917  |
| LAAGALVLSACGNDD  | PERIPLASMIC PHOSPHATE-BINDING LIPOPROTEIN PSTS3 YP_177768                    | -0,212072533  |
| NTFNLTQGDVVKRFR  | MTB48 AAK31576                                                               | -0,212171744  |
| RDRNYTAPGGGQFTL  | MTB81 (publication)                                                          | -0,212389039  |
| LAGCSSTKPVSQDTS  | CAA98350.1; CELL SURFACE LIPOPROTEIN MPT83                                   | -0,212822113  |
| ASDPGLTQTGTAVGT  | TRANSMEMBRANE SERINE/THREONINE-PROTEIN KINASE D PKND NP_215446               | -0,213143528  |
| VNEHLIGPPPATVIR  | CONSERVED HYPOTHETICAL PROTEIN CAB08634                                      | -0,213340979  |
| LGEPVDRVARADEAL  | CONSERVED HYPOTHETICAL PROTEIN CAB08634                                      | -0,213418173  |
| RVFSREDEDELPAKV  | RNA POLYMERASE BETA-SUBUNIT AAA21416                                         | -0,21345037   |
| LAGNVTLQLGNLND   | YP_177963; PPE FAMILY PROTEIN                                                | -0,213598911  |
| NVGQQLSGVLAAGTA  | YP_177963; PPE FAMILY PROTEIN                                                | -0,214836941  |
| PYVVTGLNNSVASGR  | MYCOBACTERIUM BOVIS MYCOCEROSIC ACID SYNTHASE GENE; M95808                   | -0,214959612  |
| LKKRGDSDQDAMARL  | MYCOBACTERIUM BOVIS ACYL-COA SYNTHASE GENE; U75685                           | -0,215240245  |
| VTDFNNRVVTLAAGS  | TRANSMEMBRANE SERINE/THREONINE-PROTEIN KINASE D PKND NP_215446               | -0,215242237  |
| DAASIMAIVADIERY  | CONSERVED HYPOTHETICAL PROTEIN TB18.5CAD93033                                | -0,215554636  |
| AAHGTVTRHYRQYQA  | CAA17111.1; PROBABLE ISOCITRATE DEHYDROGENASE                                | -0,215827968  |
| DPNTATAGELARDSI  | HYPOTHETICAL PROTEIN RV2626C NP_217142                                       | -0,21660966   |
| TRQTLQGASVTVTGQ  | CAA98373.1; MAJOR SECRETED IMMUNOGENIC PROTEIN                               | -0,216884125  |
| QGTGPAGPAAAAAAT  | PPE FAMILY PROTEIN CAE55334                                                  | -0,217063785  |
| PLRLVYSDGTATGAA  | PUTATIVE CYCLOPROPANE-FATTY-ACYL-PHOSPHOLIPID SYNTHASE UFAA1 NP_854118       | -0,217316646  |
| AVLTAAPLLAAAGC   | PERIPLASMIC PHOSPHATE-BINDING LIPOPROTEIN PSTS1 YP_177770                    | -0,217460051  |
| IILSAEGLILTNHIV  | CAA17582.1; PROBABLE SERINE PROTEASE PEPD                                    | -0,218321114  |
| EIPDRWDADDYYDP   | MYCOBACTERIUM BOVIS MYCOCEROSIC ACID SYNTHASE GENE; M95808                   | -0,218792497  |
| AAVSEIRMTSGSSSG  | YP_177963; PPE FAMILY PROTEIN                                                | -0,219124153  |
| GTRTGNVTLAEGPPA  | CAB09453.1; PROBABLE SERINE PROTEASE PEPA                                    | -0,220203785  |
| RRALRQIGVLERPVG  | CAA16102.1; ESAT-6 LIKE PROTEIN ESXQ                                         | -0,22041543   |
| PRYASRMPVLSKTVE  | CONSERVED HYPOTHETICAL PROTEIN TB18.5CAD93033                                | -0,220964846  |
| LADSRQSKTAASPSP  | RNA POLYMERASE BETA-SUBUNIT AAA21416                                         | -0,222218095  |
| PFTGIDFRLSPSGVA  | TRANSMEMBRANE SERINE/THREONINE-PROTEIN KINASE D PKND NP_215446               | -0,222355579  |
| TNGAAIGLVLVAGLI  | MCE-FAMILY PROTEIN MCE1AYP_177701                                            | -0,222681946  |
| QNGVRAMSSLGSSLG  | CAE55371.1; PPE FAMILY PROTEIN                                               | -0,222785585  |
| AISVPGDRRTEKLVA  | MYCOBACTERIUM BOVIS ACYL-COA SYNTHASE GENE; U75685                           | -0,222879386  |
| SALLVVKRGNAGSR   | CAB01474.1; CONSERVED HYPOTHETICAL PROTEIN CFP17                             | -0,223060848  |
| DDGQEQAQGAQACTIT | MYCOBACTERIUM BOVIS MYCOCEROSIC ACID SYNTHASE GENE; M95808                   | -0,223764426  |
| EQQRLARQRVAAAGF  | PUTATIVE CYCLOPROPANE-FATTY-ACYL-PHOSPHOLIPID SYNTHASE UFAA1 NP_854118       | -0,224318696  |
| ENSDSDYDREKLQER  | 60 kDa chaperonin 2 P0A521                                                   | -0,224395891  |
| WGQLLLLEGIPDPG   | CAB06237.1; CONSERVED HYPOTHETICAL PROTEIN                                   | -0,224420974  |
| TAGPQLVVPVLNARF  | MTB81 (publication)                                                          | -0,224883915  |
| YGLAEATVYVATSKP  | MYCOBACTERIUM BOVIS ACYL-COA SYNTHASE GENE; U75685                           | -0,225722775  |
| SGGSDDDARAITDT   | ALTERNATE RNA POLYMERASE SIGMA FACTOR SIGF CAB07069                          | -0,225943357  |
| SRACTDALLDSGTTS  | SECRETED L-ALANINE DEHYDROGENASE ALD CAA15575                                | -0,22599492   |
| AGGFNTGVANAGSYN  | YP_177963; PPE FAMILY PROTEIN                                                | -0,22631958   |
| GNLNLGGGNLGGQNL  | YP_177963; PPE FAMILY PROTEIN                                                | -0,226828428  |
| QAAQAAGQARLAASA  | PPE FAMILY PROTEIN CAE55504                                                  | -0,22715873   |
| QVVLGWKVSCLKSST  | CAB06500.1; IMMUNOGENIC PROTEIN MPT63                                        | -0,227519707  |
| GDAATACEASLDQQR  | MTB48 AAK31576                                                               | -0,227552878  |
| GQILFTFLHLAASRA  | SECRETED L-ALANINE DEHYDROGENASE ALD CAA15575                                | -0,227605481  |
| GFAVPDIPAIHID    | YP_177963; PPE FAMILY PROTEIN                                                | -0,227807345  |
| RRTAVLDPDHDGMRV  | MYCOBACTERIUM BOVIS MYCOCEROSIC ACID SYNTHASE GENE; M95808                   | -0,228240731  |
| DLDDVAGEPRPGNYR  | 3-OXOACYL-[ACYL-CARRIER PROTEIN] SYNTHASE 2 KASB CAA94642                    | -0,22851024   |
| LGNIGNLNLGAANIG  | YP_177963; PPE FAMILY PROTEIN                                                | -0,228925231  |
| NVGLGNIGNLNLGAA  | YP_177963; PPE FAMILY PROTEIN                                                | -0,229187085  |
| DGRTAPFTVVGADPT  | CAA17582.1; PROBABLE SERINE PROTEASE PEPD                                    | -0,229878601  |

| Peptides         | Protein                                                                | Average Index |
|------------------|------------------------------------------------------------------------|---------------|
| GHGNVGFNGSGLGAA  | YP_177963; PPE FAMILY PROTEIN                                          | -0,230562794  |
| QRPLYRRDGSYIITG  | MYCOBACTERIUM BOVIS MYCOCEROSIC ACID SYNTHASE GENE; M95808             | -0,230565304  |
| PGFTIPTGPIHGLP   | YP_177963; PPE FAMILY PROTEIN                                          | -0,230891642  |
| GVLDPITIFFGGFTI  | YP_177963; PPE FAMILY PROTEIN                                          | -0,231123662  |
| LRWQQDHGRHLDDA   | HYPOTHETICAL PROTEIN RV2623 NP_217139                                  | -0,231129164  |
| PSSGFFNTGAGGGSG  | YP_177963; PPE FAMILY PROTEIN                                          | -0,231238235  |
| GFSYSIEITGSTLVD  | YP_177963; PPE FAMILY PROTEIN                                          | -0,231464918  |
| VAAVALFGEPSSGFS  | PROBABLE CUTINASE PRECURSOR CFP21 NP_216500                            | -0,231808427  |
| RPVVAAIKEFFGTSQ  | RNA POLYMERASE BETA-SUBUNIT AAA21416                                   | -0,231848771  |
| ARSQPNPKARQTIEG  | MYCOBACTERIUM BOVIS MYCOCEROSIC ACID SYNTHASE GENE; M95808             | -0,23195329   |
| VDSDRTVVYVADRGND | TRANSMEMBRANE SERINE/THREONINE-PROTEIN KINASE D PKND NP_215446         | -0,232270826  |
| PENLPRVNARGGPGG  | MCE-FAMILY PROTEIN MCE1AYP_177701                                      | -0,233473844  |
| LNLDGPTTAKIFNGT  | PERIPLASMIC PHOSPHATE-BINDING LIPOPROTEIN PSTS2 YP_177769              | -0,233690477  |
| ATAGRSDLKTVPANA  | POSSIBLE GLYCOSYL TRANSFERASE CAB05415                                 | -0,23375119   |
| TNDAIVDTGDSEVFE  | MTB81 (publication)                                                    | -0,23431226   |
| LPVTVIAATAGRNHL  | POSSIBLE GLYCOSYL TRANSFERASE CAB05418                                 | -0,234951842  |
| VTSALSSSHGLSVAD  | MYCOBACTERIUM BOVIS ACYL-COA SYNTHASE GENE; U75685                     | -0,234977354  |
| GAGAVADAQATLAQL  | PPE FAMILY PROTEIN CAE55334                                            | -0,235491845  |
| VVFARGTHQASGLGD  | PROBABLE CUTINASE PRECURSOR CFP21 NP_216500                            | -0,235654828  |
| ADDSLYEADTLARVA  | POSSIBLE GLYCOSYL TRANSFERASE CAB05419                                 | -0,236361949  |
| SNGAWGKGAGKSFQG  | PERIPLASMIC PHOSPHATE-BINDING LIPOPROTEIN PSTS3 YP_177768              | -0,236533877  |
| AAGVQPETGVVVEAH  | MYCOBACTERIUM BOVIS MYCOCEROSIC ACID SYNTHASE GENE; M95808             | -0,236587559  |
| RTLDDPFVEEFDLPV  | 3-OXOACYL-[ACYL-CARRIER PROTEIN] SYNTHASE 2 KASB CAA94642              | -0,236588495  |
| NYTAPGGGQFTLPGR  | MTB81 (publication)                                                    | -0,237043113  |
| PAFHERYPNVTITAAQ | PERIPLASMIC PHOSPHATE-BINDING LIPOPROTEIN PSTS1 YP_177770              | -0,237071095  |
| LNALADLPVTVIAAT  | POSSIBLE GLYCOSYL TRANSFERASE CAB05418                                 | -0,237167711  |
| AIAIAFLAGCSSTKP  | CAA98350.1; CELL SURFACE LIPOPROTEIN MPT83                             | -0,237382373  |
| GHGNVGFNGSGLGAL  | YP_177963; PPE FAMILY PROTEIN                                          | -0,238571511  |
| EIMRSTLEKDNTVGT  | RNA POLYMERASE BETA-SUBUNIT AAA21416                                   | -0,238942915  |
| KLREPLEVPGLLDVQ  | RNA POLYMERASE BETA-SUBUNIT AAA21416                                   | -0,239390142  |
| PPVQGTGPAGPAAAA  | PPE FAMILY PROTEIN CAE55334                                            | -0,240503424  |
| SGFFNSGDGGVSGFG  | YP_177963; PPE FAMILY PROTEIN                                          | -0,24121047   |
| HERYPNVTITAQGTG  | PERIPLASMIC PHOSPHATE-BINDING LIPOPROTEIN PSTS1 YP_177770              | -0,241414658  |
| RRLRTVGELIQNQIR  | RNA POLYMERASE BETA-SUBUNIT AAA21416                                   | -0,241829536  |
| KIDRLLDVAGVQQGS  | PUTATIVE CYCLOPROPANE-FATTY-ACYL-PHOSPHOLIPID SYNTHASE UFAA1 NP_854118 | -0,242325506  |
| GFGNDTTAPSSGFFN  | YP_177963; PPE FAMILY PROTEIN                                          | -0,242647743  |
| SQGMGPSLIGLAMGD  | CAB10044.1; SECRETED ANTIGEN 85-B FBPB (85B)                           | -0,243782329  |
| RAAANLGINLSRNES  | RNA POLYMERASE BETA-SUBUNIT AAA21416                                   | -0,244340399  |
| TGTQVGDLAEGRAIN  | 3-OXOACYL-[ACYL-CARRIER PROTEIN] SYNTHASE 2 KASB CAA94642              | -0,244355533  |
| QLNAMKGDQLQSSLGA | CAB10044.1; SECRETED ANTIGEN 85-B FBPB (85B)                           | -0,245178137  |
| QQDHGRHLIDDALKV  | HYPOTHETICAL PROTEIN RV2623 NP_217139                                  | -0,246621713  |
| DFAGSDVPLNPSTGQ  | PERIPLASMIC PHOSPHATE-BINDING LIPOPROTEIN PSTS2 YP_177769              | -0,246697423  |
| LVVALVYLQFRGEFT  | MCE-FAMILY PROTEIN MCE1AYP_177701                                      | -0,246862535  |
| DGRTELTMPSEDAQ   | MYCOBACTERIUM BOVIS MYCOCEROSIC ACID SYNTHASE GENE; M95808             | -0,246882344  |
| WLLFLGADDSLYEAD  | POSSIBLE GLYCOSYL TRANSFERASE CAB05419                                 | -0,247747788  |
| EFLKRLPMSTRLGIR  | POSSIBLE GLYCOSYL TRANSFERASE CAB05419                                 | -0,247898151  |
| DMAGRDLGNILTILS  | MYCOBACTERIUM BOVIS ACYL-COA SYNTHASE GENE; U75685                     | -0,248617057  |
| KARTTVARDADMLSE  | CONSERVED HYPOTHETICAL PROTEIN CAB08634                                | -0,249056071  |
| FPDPTISVQIQVAIP  | YP_177963; PPE FAMILY PROTEIN                                          | -0,250168473  |
| DSVGQTIAGATISGV  | PERIPLASMIC PHOSPHATE-BINDING LIPOPROTEIN PSTS3 YP_177768              | -0,250424609  |
| LRTTLIDVDEHTDVE  | MYCOBACTERIUM BOVIS MYCOCEROSIC ACID SYNTHASE GENE; M95808             | -0,250731617  |
| LTSGLLGIATLNPQ   | PPE FAMILY PROTEIN CAE55334                                            | -0,250923494  |
| DVDTLIVGELGEATV  | CONSERVED HYPOTHETICAL PROTEIN CAB08634                                | -0,252232226  |
| DPRHAGPATAADAGD  | CAA16102.1; ESAT-6 LIKE PROTEIN ESXQ                                   | -0,252246713  |
| AEKGPTYNKVRGDKV  | MTB81 (publication)                                                    | -0,252633791  |
| HADPCSDIAVVFARG  | PROBABLE CUTINASE PRECURSOR CFP21 NP_216500                            | -0,253804567  |
| LSLTIPGFTIPGGTL  | YP_177963; PPE FAMILY PROTEIN                                          | -0,253868535  |
| PTLNLVNLDPEIDL   | 3-OXOACYL-[ACYL-CARRIER PROTEIN] SYNTHASE 2 KASB CAA94642              | -0,254032023  |
| TRHYRQYQAGKPTST  | CAA17111.1; PROBABLE ISOCITRATE DEHYDROGENASE                          | -0,255182477  |
| DANFGLGNAGLAAGL  | YP_177963; PPE FAMILY PROTEIN                                          | -0,25572256   |
| APINLNPTTLHFPGF  | YP_177963; PPE FAMILY PROTEIN                                          | -0,257487933  |
| YEAIVKGENIPEPGI  | RNA POLYMERASE BETA-SUBUNIT AAA21416                                   | -0,25749877   |

| Peptides         | Protein                                                                      | Average Index |
|------------------|------------------------------------------------------------------------------|---------------|
| NVELDPGQPVSRSLVI | CAA17343.1; HEAT SHOCK PROTEIN HSP                                           | -0,257789324  |
| GVSIAKEIELEDPYE  | 60 kDa chaperonin 2 P0A521                                                   | -0,257978052  |
| TSDNFQKYLDGASNG  | PERIPLASMIC PHOSPHATE-BINDING LIPOPROTEIN PSTS2 YP_177769                    | -0,258342494  |
| NANTGVANSNGNVDTG | YP_177963; PPE FAMILY PROTEIN                                                | -0,25885151   |
| FAHKLESVVIATVES  | CAA17111.1; PROBABLE ISOCITRATE DEHYDROGENASE                                | -0,258962115  |
| TQGILHTGPSSATT   | YP_177963; PPE FAMILY PROTEIN                                                | -0,259104705  |
| NNLGIGLTGDNQSGI  | YP_177963; PPE FAMILY PROTEIN                                                | -0,259920871  |
| KVDQPGTVTLTFTPA  | CAA17111.1; PROBABLE ISOCITRATE DEHYDROGENASE                                | -0,260013399  |
| LLKELQSLCLNVEVL  | RNA POLYMERASE BETA-SUBUNIT AAA21416                                         | -0,260693181  |
| NSGVDISGMFNVSTL  | YP_177963; PPE FAMILY PROTEIN                                                | -0,261139719  |
| PIPLFPAVGADVTGD  | YP_177963; PPE FAMILY PROTEIN                                                | -0,26358494   |
| FVSFAVPTIMGEVRR  | ALTERNATE RNA POLYMERASE SIGMA FACTOR SIGF CAB07069                          | -0,264049927  |
| GTALTQSPIINLGLA  | YP_177963; PPE FAMILY PROTEIN                                                | -0,264340008  |
| DLLGADPELDVVGEA  | TWO COMPONENT TRANSCRIPTIONAL REGULATORY PROTEIN DEVR NP_217649              | -0,264402577  |
| TAARAVLDMASVGA   | YP_177963; PPE FAMILY PROTEIN                                                | -0,264416478  |
| VNSNLVAHMKPGAVL  | SECRETED L-ALANINE DEHYDROGENASE ALD CAA15575                                | -0,26544382   |
| SSGAGGTSGSVHCGG  | PERIPLASMIC PHOSPHATE-BINDING LIPOPROTEIN PSTS2 YP_177769                    | -0,265560598  |
| YDEEARRGLERGLNA  | 60 kDa chaperonin 2 P0A521                                                   | -0,265780813  |
| TRDIPNISDEVLADL  | RNA POLYMERASE BETA-SUBUNIT AAA21416                                         | -0,266242123  |
| GDVISVTWQTKSGGT  | CAB09453.1; PROBABLE SERINE PROTEASE PEPA                                    | -0,266281636  |
| LVEHVMVGILQRCAP  | CAA16030.1; PROBABLE MOLYBDOPTERIN-GUANINE DINUCLEOTIDE BIOSYNTHESIS PROTEIN | -0,266342897  |
| TTSNFIWQQLLLLGE  | CAB06237.1; CONSERVED HYPOTHETICAL PROTEIN                                   | -0,266418141  |
| NSGLEPGVVAEKVRN  | 60 kDa chaperonin 2 P0A521                                                   | -0,266687415  |
| VVVIREQPPPGNPPR  | PPE FAMILY PROTEIN CAE55334                                                  | -0,26673411   |
| PDVVVGDNRLSLSVS  | POSSIBLE GLYCOSYL TRANSFERASE CAB05418                                       | -0,266926179  |
| KPPVVVIREQPPPGN  | PPE FAMILY PROTEIN CAE55334                                                  | -0,266956548  |
| NAGSSNYGLANLGVG  | YP_177963; PPE FAMILY PROTEIN                                                | -0,267041872  |
| PIQILPTIPLNIHQT  | YP_177963; PPE FAMILY PROTEIN                                                | -0,267417053  |
| LVLDVPRSGRRSVAV  | MYCOBACTERIUM BOVIS MYCOCEROSIC ACID SYNTHASE GENE; M95808                   | -0,267658148  |
| AEKVRNLPAGHGLNA  | 60 kDa chaperonin 2 P0A521                                                   | -0,268544715  |
| DSSDCGTIRVGSFRG  | CAA16102.1; ESAT-6 LIKE PROTEIN ESXQ                                         | -0,269422644  |
| LRNVAAGANPLGLKR  | 60 kDa chaperonin 2 P0A521                                                   | -0,269525338  |
| IGPVSLPIFGFGGAP  | YP_177963; PPE FAMILY PROTEIN                                                | -0,27106608   |
| GDLLPGVGDGLKLPT  | CAB06237.1; CONSERVED HYPOTHETICAL PROTEIN                                   | -0,27135556   |
| RGNLDTGSAAAKNTPG | PERIPLASMIC PHOSPHATE-BINDING LIPOPROTEIN PSTS3 YP_177768                    | -0,273795209  |
| FGNLGNHVSQVSDIG  | YP_177963; PPE FAMILY PROTEIN                                                | -0,274140655  |
| VSRRAKVDVLIVHTT  | CAB08889.1; IRON-REGULATED CONSERVED HYPOTHETICAL PROTEIN                    | -0,276911525  |
| PTITNDGVSIAKEIE  | 60 kDa chaperonin 2 P0A521                                                   | -0,277579369  |
| ESMKMEIPVLAEEAG  | CAB08316.1; BIOTINYLATED PROTEIN TB7.3                                       | -0,27865641   |
| VLNRDRNYTAPGGGQ  | MTB81 (publication)                                                          | -0,279548314  |
| PYEALGGTRPGLIPG  | CAA17582.1; PROBABLE SERINE PROTEASE PEPD                                    | -0,281595756  |
| KIIYFAAYVITSVDE  | RNA POLYMERASE BETA-SUBUNIT AAA21417                                         | -0,282027922  |
| CSSNKSTTGSGETTT  | LIPOPROTEIN LPQH PRECURSOR P0A5J0                                            | -0,282179042  |
| LFPILELGTSAKMLS  | PROBABLE ISOCITRATE DEHYDROGENASE CAA16247                                   | -0,282225084  |
| NWNIGIGITGNGQIG  | PPE FAMILY PROTEIN CAE55504                                                  | -0,282641076  |
| YSLRTNSEILSGIGI  | MCE-FAMILY PROTEIN MCE1AYP_177701                                            | -0,282702864  |
| AGLAAGFSGRAQVGK  | MTB81 (publication)                                                          | -0,284947393  |
| FSIPQLGFTLSGATP  | PPE FAMILY PROTEIN CAE55504                                                  | -0,285715336  |
| ISSTKIDGVGYPVHK  | CONSERVED HYPOTHETICAL PROTEIN CAB08634                                      | -0,286602907  |
| FNVSTLGSAPAVISG  | YP_177963; PPE FAMILY PROTEIN                                                | -0,287291072  |
| RLLGSVSSGLLRHAH  | HYPOTHETICAL PROTEIN RV2623 NP_217139                                        | -0,289252291  |
| TETLLKGAKEVETKE  | 60 kDa chaperonin 2 P0A521                                                   | -0,289714417  |
| SEHRLVGIVTEADIA  | HYPOTHETICAL PROTEIN RV2626C NP_217142                                       | -0,290368727  |
| HQDVPSPFGLFPDVD  | PPE FAMILY PROTEIN CAE55504                                                  | -0,290891601  |
| SLAAIAIAFLAGCSS  | CAA98350.1; CELL SURFACE LIPOPROTEIN MPT83                                   | -0,290976517  |
| NAGGLGPTQGHPLSS  | PPE FAMILY PROTEIN CAE55334                                                  | -0,292448831  |
| FLRVLNRDRNYTAPG  | MTB81 (publication)                                                          | -0,293127662  |
| LKVGNAADVCGGVST  | CAA98373.1; MAJOR SECRETED IMMUNOGENIC PROTEIN                               | -0,294521559  |
| ISTGDVITAVDGAPI  | CAB09453.1; PROBABLE SERINE PROTEASE PEPA                                    | -0,296554342  |
| LEPGVVAEKVRNLPA  | 60 kDa chaperonin 2 P0A521                                                   | -0,297100507  |
| DFLSELDAQAQAGTE  | CAB01474.1; CONSERVED HYPOTHETICAL PROTEIN CFP17                             | -0,297649723  |
| FRLVFLTGPQKGEDD  | CAB01474.1; CONSERVED HYPOTHETICAL PROTEIN CFP17                             | -0,298233321  |

| Peptides        | Protein                                                                | Average Index |
|-----------------|------------------------------------------------------------------------|---------------|
| VDISGMFNVSTLGSA | YP_177963; PPE FAMILY PROTEIN                                          | -0,298572594  |
| ADRGNNRVVKLAAGS | TRANSMEMBRANE SERINE/THREONINE-PROTEIN KINASE D PKND NP_215446         | -0,298930406  |
| GTTDRAGVKDVILES | MTB81 (publication)                                                    | -0,299591192  |
| MSPVNKSFEIEVTC  | LIPOPROTEIN LPQH PRECURSOR P0A5J0                                      | -0,29961902   |
| AAVEAAEEQSEFDVI | CAB07109.1; PROBABLE 50S RIBOSOMAL PROTEIN L7/L12 RPLL                 | -0,300901232  |
| SATYQSAIPPRGTQA | CAA98382.1; IMMUNOGENIC PROTEIN MPT64                                  | -0,301166226  |
| IAKLEPVIAAESGFS | MYCOBACTERIUM BOVIS MYCOCEROSIC ACID SYNTHASE GENE; M95808             | -0,301512671  |
| LTVGAGVASADPVDA | LOW MOLECULAR WEIGHT T-CELL ANTIGEN TB8.4 NP_215690                    | -0,302237221  |
| IEEHEIDARDTKLGA | RNA POLYMERASE BETA-SUBUNIT AAA21416                                   | -0,305059374  |
| IAALNPGVNLPGTAV | PERIPLASMIC PHOSPHATE-BINDING LIPOPROTEIN PSTS1 YP_177770              | -0,308466997  |
| VAITPAGVAELTRRG | SECRETED L-ALANINE DEHYDROGENASE ALD CAA15575                          | -0,308799277  |
| LELPIDVDKDVNVE  | CAA17343.1; HEAT SHOCK PROTEIN HSP                                     | -0,309312105  |
| LIQDLRLVVELGYD  | PPE FAMILY PROTEIN CAE55504                                            | -0,309472203  |
| EIGTGWGELCIRAAA | PUTATIVE CYCLOPROPANE-FATTY-ACYL-PHOSPHOLIPID SYNTHASE UFAA1 NP_854118 | -0,310339388  |
| LARVVGLVQEEQPSD | CAA17582.1; PROBABLE SERINE PROTEASE PEPD                              | -0,310485449  |
| AAGTAAQAAVVRFQE | CAA17966.1; 10 KDA CULTURE FILTRATE ANTIGEN ESXB                       | -0,313914482  |
| PVATAASNPMPLSTL | CAA98350.1; CELL SURFACE LIPOPROTEIN MPT83                             | -0,315898357  |
| KQKQELDEISTNIRQ | CAA17966.1; 10 KDA CULTURE FILTRATE ANTIGEN ESXB                       | -0,324960335  |
| VNIKPLEDKILVQAN | CAB01005.1; 10 KDA CHAPERONIN GROES                                    | -0,32587626   |
| LHVGEPTSSTLTEE  | RNA POLYMERASE BETA-SUBUNIT AAA21416                                   | -0,330583347  |
| GLTVPPPVAENRAE  | CAE55371.1; PPE FAMILY PROTEIN                                         | -0,333141888  |
| LSELGEPVDRVARAD | CONSERVED HYPOTHETICAL PROTEIN CAB08634                                | -0,333407473  |
| VLVAPVSPSTASSRT | PPE FAMILY PROTEIN CAE55489                                            | -0,336240473  |
| GRQSEEGSGIILSAE | CAA17582.1; PROBABLE SERINE PROTEASE PEPD                              | -0,336531638  |
| GAGVSGLLNQASSPM | YP_177963; PPE FAMILY PROTEIN                                          | -0,34771685   |
| PALTAARAFLDMAAS | YP_177963; PPE FAMILY PROTEIN                                          | -0,351552056  |
| NVARELSRCGSTGDR | MYCOBACTERIUM BOVIS ACYL-COA SYNTHASE GENE; U75685                     | -0,353023131  |
| AAAWDGLAEELGSA  | YP_177963; PPE FAMILY PROTEIN                                          | -0,362995126  |
| AQEAELQGLLSCTLP | RNA POLYMERASE BETA-SUBUNIT AAA21416                                   | -0,366421509  |
| TEEHAKARGANILAR | 3-OXOACYL-[ACYL-CARRIER PROTEIN] SYNTHASE 2 KASB CAA94642              | -0,367179535  |
| IVSTPVFDGAQAEAL | RNA POLYMERASE BETA-SUBUNIT AAA21416                                   | -0,372112454  |
| VSARLAGIPYIAIAN | POSSIBLE GLYCOSYL TRANSFERASE CAB05415                                 | -0,373672075  |
| GLTHKRRLSALGPGG | RNA POLYMERASE BETA-SUBUNIT AAA21416                                   | -0,377898616  |
| GRHGNGKVIGKILPV | RNA POLYMERASE BETA-SUBUNIT AAA21416                                   | -0,384967081  |
| GVVNISGIEIKDLAG | YP_177963; PPE FAMILY PROTEIN                                          | -0,38607622   |
| YVSRLAKLGMERRT  | TWO COMPONENT TRANSCRIPTIONAL REGULATORY PROTEIN DEVR NP_217649        | -0,386874925  |
| IPQLPLGLGLSGGTP | YP_177963; PPE FAMILY PROTEIN                                          | -0,39296585   |
| VHEMVSIPEDGGVVL | CAA17111.1; PROBABLE ISOCITRATE DEHYDROGENASE                          | -0,395192255  |
| LPTVVIDRIPVELHA | YP_177963; PPE FAMILY PROTEIN                                          | -0,40335159   |
| VVGTRQTLQGASVTV | CAA98373.1; MAJOR SECRETED IMMUNOGENIC PROTEIN                         | -0,424812268  |
| SVQIQVAIPLTSATL | YP_177963; PPE FAMILY PROTEIN                                          | -0,44194934   |
| DTTILPPIHLGLTGQ | YP_177963; PPE FAMILY PROTEIN                                          | -0,442488384  |
| TLHSGVLNLGSLSG  | YP_177963; PPE FAMILY PROTEIN                                          | -0,453699372  |
| FEAALAATVDPAAVA | YP_177963; PPE FAMILY PROTEIN                                          | -0,455817492  |
| AAAAALPAFSPPAQA | YP_177963; PPE FAMILY PROTEIN                                          | -0,458665758  |
| VAAVLPACLDSIARQ | POSSIBLE GLYCOSYL TRANSFERASE CAB05419                                 | -0,46019168   |
| LKVVEQASLRAGPPT | HYPOTHETICAL PROTEIN RV2623 NP_217139                                  | -0,462208415  |
| HLIGPPPATVIRLSD | CONSERVED HYPOTHETICAL PROTEIN CAB08634                                | -0,464400191  |
| VELGYDRTAHQDVPS | PPE FAMILY PROTEIN CAE55504                                            | -0,495205498  |
| MAKLSTDELLDAFKE | CAB07109.1; PROBABLE 50S RIBOSOMAL PROTEIN L7/L12 RPLL                 | -0,508461187  |
| GLLGIASTLNPQVGS | PPE FAMILY PROTEIN CAE55334                                            | -0,509050419  |
| VYVADRGNDRVVKLT | TRANSMEMBRANE SERINE/THREONINE-PROTEIN KINASE D PKND NP_215446         | -0,521859632  |
| DVQVTMPVPEPMVKM | CONSERVED HYPOTHETICAL PROTEIN TB18.5CAD93033                          | -0,541909454  |
| LLGLLSEGLTNKQIA | TWO COMPONENT TRANSCRIPTIONAL REGULATORY PROTEIN DEVR NP_217649        | -0,547093757  |
| TRLASLVANLLGQN  | PPE FAMILY PROTEIN CAE55504                                            | -0,58142395   |
| DTNIIKLPNISASVP | PROBABLE ISOCITRATE DEHYDROGENASE CAA16247                             | -0,612020171  |
| SIIEVDLLDLAPNG  | MYCOBACTERIUM BOVIS ACYL-COA SYNTHASE GENE; U75685                     | -0,642602812  |
| VVFPIVQGELSKQTG | CAA98382.1; IMMUNOGENIC PROTEIN MPT64                                  | -0,656512179  |
| KRRQPVTVLLKALGW | RNA POLYMERASE BETA-SUBUNIT AAA21416                                   | -0,701395061  |
| LNALADAVKVTLGPK | 60 kDa chaperonin 2 P0A521                                             | -0,737675477  |

| Peptides        | Protein                                                   | Average Index |
|-----------------|-----------------------------------------------------------|---------------|
| APLDGVGALLRYAAT | CONSERVED HYPOTHETICAL PROTEIN CAB08634                   | -0,772298387  |
| ADPLTSGLLGIASTL | PPE FAMILY PROTEIN CAE55334                               | -0,831953838  |
| LRVLDEIAPDLVVG  | POSSIBLE GLYCOSYL TRANSFERASE CAB05415                    | -0,871855689  |
| STVKDLLPLEKVIG  | 60 kDa chaperonin 2 P0A521                                | -1,006236593  |
| MKLNRFGAAGVLA   | PERIPLASMIC PHOSPHATE-BINDING LIPOPROTEIN PSTS3 YP_177768 | 0,111501131   |
| NAAFSKLPASTIDEL | CAA98373.1; MAJOR SECRETED IMMUNOGENIC PROTEIN            | -0,424477996  |
